# Supplementary material for: Genetic and Epidemiological Evidence Linking Respiratory and Musculoskeletal Diseases: Shared Risk Factors and Intervention Windows
Source: Research Square preprint supplement (doi:10.21203/rs.3.rs-8232381/v1), 2025-12-08
Supplement: Supplementary file 1 [file 09e796973bc46ac1b37bc011.xlsx]

## Sheet: S1 
pair	Breathing condition	p1	p2	p1_long_name	p2_long_name	within_domain	Domian.(ICD.chapter)	genetics_strength_category	rg	rg_lci	rg_uci	rg_se	rg_p_fdr	observations_strength_category	Output.OR	Genetic.Output	p2_UKB_cases	p2_UKB_controls	p2_FinnGen_cases	p2_FinnGen_controls	p2_Consortium_cases	p2_Consortium_controls	Total N
asthma&OA	asthma	asthma	OA	Asthma	Osteoarthritis (excl spine)	across domain	Diseases of the respiratory system	Gen Intermediate 0.2539 <..≤ 0.478	0.3576	0.310952	0.404248	0.0238	2.47909e-49	Obs Weak ≤ 0.3817	OR:1.46, CI:1.45:1.47, p:<0.01	rg = 0.3576-SE=0.0238	111798	338399	96500	280777	177517	649173	1654164
asthma&PMR	asthma	asthma	PMR	Asthma	Polymyalgia Rheumatica	across domain	Diseases of the respiratory system	Gen Weak ≤ 0.2539	0.1415	0.02488	0.25812	0.0595	0.0289104	Obs Weak ≤ 0.3817	OR:1.3, CI:1.28:1.33, p:<0.01	rg = 0.1415-SE=0.0595	5366	444831	3501	365533	NA	NA	819231
asthma&psoriasis	asthma	asthma	psoriasis	Asthma	Psoriasis	across domain	Diseases of the respiratory system	Gen Weak ≤ 0.2539	0.1911	0.105448	0.276752	0.0437	3.24615e-05	Obs Weak ≤ 0.3817	OR:1.18, CI:1.17:1.2, p:<0.01	rg = 0.1911-SE=0.0437	11970	438227	9267	364071	NA	NA	823535
asthma&RA	asthma	asthma	RA	Asthma	Rheumatoid Arthritis	across domain	Diseases of the respiratory system	Gen Intermediate 0.2539 <..≤ 0.478	0.2827	0.213904	0.351496	0.0351	5.73681e-15	Obs Weak ≤ 0.3817	OR:1.38, CI:1.35:1.41, p:<0.01	rg = 0.2827-SE=0.0351	9952	440245	12555	240862	31313	995377	1730304
OA&asthma	asthma	OA	asthma	Osteoarthritis (excl spine)	Asthma	across domain	Diseases of the musculoskeletal system and connective tissue	Gen Intermediate 0.2539 <..≤ 0.478	0.3576	0.310952	0.404248	0.0238	2.47909e-49	Obs Weak ≤ 0.3817	OR:1.46, CI:1.45:1.47, p:<0.01	rg = 0.3576-SE=0.0238	52806	397391	42163	202399	69189	702199	1466147
PMR&asthma	asthma	PMR	asthma	Polymyalgia Rheumatica	Asthma	across domain	Diseases of the musculoskeletal system and connective tissue	Gen Weak ≤ 0.2539	0.1415	0.02488	0.25812	0.0595	0.0289104	Obs Weak ≤ 0.3817	OR:1.32, CI:1.29:1.35, p:<0.01	rg = 0.1415-SE=0.0595	52806	397391	42163	202399	69189	702199	1466147
psoriasis&asthma	asthma	psoriasis	asthma	Psoriasis	Asthma	across domain	Diseases of the skin and subcutaneous tissue	Gen Weak ≤ 0.2539	0.1911	0.105448	0.276752	0.0437	3.24615e-05	Obs Weak ≤ 0.3817	OR:1.18, CI:1.17:1.2, p:<0.01	rg = 0.1911-SE=0.0437	52806	397391	42163	202399	69189	702199	1466147
RA&asthma	asthma	RA	asthma	Rheumatoid Arthritis	Asthma	across domain	Diseases of the musculoskeletal system and connective tissue	Gen Intermediate 0.2539 <..≤ 0.478	0.2827	0.213904	0.351496	0.0351	5.73681e-15	Obs Weak ≤ 0.3817	OR:1.38, CI:1.35:1.41, p:<0.01	rg = 0.2827-SE=0.0351	52806	397391	42163	202399	69189	702199	1466147
COPD&OA	COPD	COPD	OA	COPD	Osteoarthritis (excl spine)	across domain	Diseases of the respiratory system	Gen Intermediate 0.2539 <..≤ 0.478	0.3553	0.310612	0.399988	0.0228	4.60452e-53	Obs Weak ≤ 0.3817	OR:1.2, CI:1.19:1.21, p:<0.01	rg = 0.3553-SE=0.0228	111798	338399	96500	280777	177517	649173	1654164
COPD&PMR	COPD	COPD	PMR	COPD	Polymyalgia Rheumatica	across domain	Diseases of the respiratory system	Gen Weak ≤ 0.2539	0.1913	0.063704	0.318896	0.0651	0.00619232	Obs Weak ≤ 0.3817	OR:1.1, CI:1.08:1.13, p:<0.01	rg = 0.1913-SE=0.0651	5366	444831	3501	365533	NA	NA	819231
COPD&psoriasis	COPD	COPD	psoriasis	COPD	Psoriasis	across domain	Diseases of the respiratory system	Gen Intermediate 0.2539 <..≤ 0.478	0.2966	0.222708	0.370492	0.0377	2.45959e-14	Obs Intermediate 0.3817 <..≤ 0.6438	OR:1.48, CI:1.46:1.51, p:<0.01	rg = 0.2966-SE=0.0377	11970	438227	9267	364071	NA	NA	823535
COPD&RA	COPD	COPD	RA	COPD	Rheumatoid Arthritis	across domain	Diseases of the respiratory system	Gen Intermediate 0.2539 <..≤ 0.478	0.35	0.268268	0.431732	0.0417	3.26484e-16	Obs Intermediate 0.3817 <..≤ 0.6438	OR:1.8, CI:1.75:1.84, p:<0.01	rg = 0.35-SE=0.0417	9952	440245	12555	240862	31313	995377	1730304
OA&COPD	COPD	OA	COPD	Osteoarthritis (excl spine)	COPD	across domain	Diseases of the musculoskeletal system and connective tissue	Gen Intermediate 0.2539 <..≤ 0.478	0.3553	0.310612	0.399988	0.0228	4.60452e-53	Obs Weak ≤ 0.3817	OR:1.21, CI:1.2:1.22, p:<0.01	rg = 0.3553-SE=0.0228	24508	425689	18266	311286	NA	NA	779749
PMR&COPD	COPD	PMR	COPD	Polymyalgia Rheumatica	COPD	across domain	Diseases of the musculoskeletal system and connective tissue	Gen Weak ≤ 0.2539	0.1913	0.063704	0.318896	0.0651	0.00619232	Obs Weak ≤ 0.3817	OR:1.15, CI:1.12:1.17, p:<0.01	rg = 0.1913-SE=0.0651	24508	425689	18266	311286	NA	NA	779749
psoriasis&COPD	COPD	psoriasis	COPD	Psoriasis	COPD	across domain	Diseases of the skin and subcutaneous tissue	Gen Intermediate 0.2539 <..≤ 0.478	0.2966	0.222708	0.370492	0.0377	2.45959e-14	Obs Intermediate 0.3817 <..≤ 0.6438	OR:1.48, CI:1.46:1.51, p:<0.01	rg = 0.2966-SE=0.0377	24508	425689	18266	311286	NA	NA	779749
RA&COPD	COPD	RA	COPD	Rheumatoid Arthritis	COPD	across domain	Diseases of the musculoskeletal system and connective tissue	Gen Intermediate 0.2539 <..≤ 0.478	0.35	0.268268	0.431732	0.0417	3.26484e-16	Obs Intermediate 0.3817 <..≤ 0.6438	OR:1.8, CI:1.75:1.84, p:<0.01	rg = 0.35-SE=0.0417	24508	425689	18266	311286	NA	NA	779749

## Sheet: S2 
Biomarker	Observational Data Categories (missing = Unknown)	Thresholds	Notes
LDL Cholesterol	Low, Moderate, Borderline High, High	Low: <1.8 mmol/LModerate: 1.8–2.5 mmol/LBorderline High: 2.5–4.0 mmol/LHigh: ≥4.0 mmol/L
HDL Cholesterol (Males)	Low, Normal	Low: <1.0 mmol/LNormal: ≥1.0 mmol/L	Different thresholds for males vs. females
HDL Cholesterol (Females)	Low, Normal	Low: <1.2 mmol/LNormal: ≥1.2 mmol/L
Systolic BP (SBP)	Low, Normal, Elevated, High	Low: <90 mmHgNormal: 90–120 mmHgElevated: 120–140 mmHgHigh: ≥140 mmHg
Diastolic BP (DBP)	Low, Normal, Elevated, High	Low: <60 mmHgNormal: 60–80 mmHgElevated: 80–90 mmHgHigh: ≥90 mmHg
Triglycerides	Normal, Borderline High, High	Normal: <1.7 mmol/LBorderline High: 1.7–2.2 mmol/LHigh: ≥2.2 mmol/L
Total Cholesterol	Desirable, Borderline High, High	Desirable: <5.2 mmol/LBorderline High: 5.2–6.2 mmol/LHigh: ≥6.2 mmol/L
Albumin (g/L)	Low, Normal, High	Low: <35 g/LNormal: 35–50 g/LHigh: >50 g/L
Socioeconomic Status (IMD)	Quintile 1–5, Unknown	Quintile 1 (most deprived) to Quintile 5 (least deprived)	From CPRD-linked ONS data; not available in genetics
Educational Attainment	—	—	Unavailable in observational data
Ethnicity	White, South Asian, Black, Other, Mixed, Unknown	—	GP-coded preferred; HES used if no GP code; “Unknown” if none available
Waist–Hip Ratio (WHR)	—	—	Unavailable in observational data
BMI Category	Underweight, Normal weight, Overweight, Obese, Unknown	Underweight: <18.5 kg/m²Normal: 18.5–24.9Overweight: 25.0–29.9Obese: ≥30.0	Most recent within 5 years before index; if missing or uncalculable → Unknown
Alcohol Consumption	0 = None, 1 = Within limits, 2 = Excess, 3 = Harmful, Unknown	As coded 0–3	Most recent ≤ index date; if ever level 3 → Harmful; ties → highest; missing → Unknown
Physical Activity (PA)	0 = No exercise, 1 = Some, 2 = Regular, 3 = High, Unknown	As coded 0–3	Most recent within 5 years before index; missing → Unknown
Smoking Status	Active smoker, Ex-smoker, Non-smoker, Unknown	—	If most recent = active → Active, If recent = ex → Ex, If non + prior history → Ex; otherwise Non
Smoking Quantity	—	—	Unavailable in observational data

## Sheet: S3 
label	levels	asthma_OA_asthma	asthma_OA_Neither	asthma_OA_p	asthma_PMR_asthma	asthma_PMR_Neither	asthma_PMR_p	asthma_psoriasis_asthma	asthma_psoriasis_Neither	asthma_psoriasis_p	asthma_RA_asthma	asthma_RA_Neither	asthma_RA_p	COPD_OA_COPD	COPD_OA_Neither	COPD_OA_p	COPD_PMR_COPD	COPD_PMR_Neither	COPD_PMR_p	COPD_psoriasis_COPD	COPD_psoriasis_Neither	COPD_psoriasis_p	COPD_RA_COPD	COPD_RA_Neither	COPD_RA_p	OA_asthma_Neither	OA_asthma_OA	OA_asthma_p	OA_COPD_Neither	OA_COPD_OA	OA_COPD_p	PMR_asthma_Neither	PMR_asthma_PMR	PMR_asthma_p	PMR_COPD_Neither	PMR_COPD_PMR	PMR_COPD_p	psoriasis_asthma_Neither	psoriasis_asthma_psoriasis	psoriasis_asthma_p	psoriasis_COPD_Neither	psoriasis_COPD_psoriasis	psoriasis_COPD_p	RA_asthma_Neither	RA_asthma_RA	RA_asthma_p	RA_COPD_Neither.y	RA_COPD_RA.y	RA_COPD_p.x
Total N		1156777	1156777		1343660	1343660		1300777	1300777		1339760	1339760		374088	374088		226745	226745		217107	217107		497654	497654		781611	781611		1708963	1708963		120187	120187		128876	128876		401938	401938		444009	444009		122149	122149		133354	133354
age	Mean (SD)	52.6 (13.0)	52.6 (13.0)	1	54.7 (14.0)	54.7 (14.0)	1	54.8 (14.2)	54.8 (14.2)	1	54.8 (14.1)	54.8 (14.1)	1	67.5 (12.1)	67.5 (12.1)	1	66.7 (11.5)	66.7 (11.5)	1	66.9 (11.5)	66.9 (11.5)	1	69.0 (12.0)	69.0 (12.0)	1	68.3 (12.8)	68.3 (12.8)	1	67.3 (12.9)	67.3 (12.9)	1	76.2 (10.5)	76.2 (10.5)	1	75.8 (10.7)	75.8 (10.7)	1	57.2 (14.0)	57.2 (14.0)	1	56.4 (13.8)	56.4 (13.8)	1	65.1 (14.0)	65.1 (14.0)	1	64.2 (14.0)	64.2 (14.0)	1
gender	1	537589 (46.5)	537589 (46.5)	1	598870 (44.6)	598870 (44.6)	1	577397 (44.4)	577397 (44.4)	1	598001 (44.6)	598001 (44.6)	1	207769 (55.5)	207769 (55.5)	1	121699 (53.7)	121699 (53.7)	1	116385 (53.6)	116385 (53.6)	1	264114 (53.1)	264114 (53.1)	1	313157 (40.1)	313157 (40.1)	1	673869 (39.4)	673869 (39.4)	1	39031 (32.5)	39031 (32.5)	1	40193 (31.2)	40193 (31.2)	1	205721 (51.2)	205721 (51.2)	1	222915 (50.2)	222915 (50.2)	1	38494 (31.5)	38494 (31.5)	1	39744 (29.8)	39744 (29.8)	1
	2	619188 (53.5)	619188 (53.5)		744790 (55.4)	744790 (55.4)		723380 (55.6)	723380 (55.6)		741759 (55.4)	741759 (55.4)		166319 (44.5)	166319 (44.5)		105046 (46.3)	105046 (46.3)		100722 (46.4)	100722 (46.4)		233540 (46.9)	233540 (46.9)		468454 (59.9)	468454 (59.9)		1035094 (60.6)	1035094 (60.6)		81156 (67.5)	81156 (67.5)		88683 (68.8)	88683 (68.8)		196217 (48.8)	196217 (48.8)		221094 (49.8)	221094 (49.8)		83655 (68.5)	83655 (68.5)		93610 (70.2)	93610 (70.2)
imd_quintile	1	243251 (21.0)	248909 (21.5)	<0.001	276577 (20.6)	285411 (21.2)	<0.001	268506 (20.6)	277199 (21.3)	<0.001	276803 (20.7)	285440 (21.3)	<0.001	50862 (13.6)	69771 (18.7)	<0.001	30683 (13.5)	60931 (26.9)	<0.001	29625 (13.6)	58872 (27.1)	<0.001	67865 (13.6)	127930 (25.7)	<0.001	195893 (25.1)	165370 (21.2)	<0.001	408969 (23.9)	361886 (21.2)	<0.001	31055 (25.8)	32108 (26.7)	<0.001	34716 (26.9)	34768 (27.0)	<0.001	86994 (21.6)	86654 (21.6)	<0.001	111338 (25.1)	96203 (21.7)	<0.001	25764 (21.1)	24121 (19.7)	<0.001	36332 (27.2)	26349 (19.8)	<0.001
	2	619188 (53.5)	619188 (53.5)		744790 (55.4)	744790 (55.4)		723380 (55.6)	723380 (55.6)		741759 (55.4)	741759 (55.4)		166319 (44.5)	166319 (44.5)		105046 (46.3)	105046 (46.3)		100722 (46.4)	100722 (46.4)		233540 (46.9)	233540 (46.9)		468454 (59.9)	468454 (59.9)		1035094 (60.6)	1035094 (60.6)		81156 (67.5)	81156 (67.5)		88683 (68.8)	88683 (68.8)		196217 (48.8)	196217 (48.8)		221094 (49.8)	221094 (49.8)		83655 (68.5)	83655 (68.5)		93610 (70.2)	93610 (70.2)
	3	218153 (18.9)	220952 (19.1)		253085 (18.8)	257024 (19.1)		245266 (18.9)	248403 (19.1)		252583 (18.9)	256197 (19.1)		67953 (18.2)	71064 (19.0)		41042 (18.1)	42708 (18.8)		39351 (18.1)	41130 (18.9)		90023 (18.1)	95646 (19.2)		151255 (19.4)	150609 (19.3)		333712 (19.5)	328690 (19.2)		24255 (20.2)	24434 (20.3)		24208 (18.8)	26141 (20.3)		77301 (19.2)	77456 (19.3)		85103 (19.2)	85537 (19.3)		23371 (19.1)	23704 (19.4)		23642 (17.7)	25910 (19.4)
	4	216898 (18.8)	216000 (18.7)		253665 (18.9)	251311 (18.7)		245524 (18.9)	243333 (18.7)		252439 (18.8)	250290 (18.7)		81138 (21.7)	72558 (19.4)		49444 (21.8)	38489 (17.0)		47224 (21.8)	36541 (16.8)		107754 (21.7)	83856 (16.9)		133276 (17.1)	144275 (18.5)		296455 (17.3)	315388 (18.5)		19057 (15.9)	18569 (15.5)		22459 (17.4)	19784 (15.4)		73037 (18.2)	73616 (18.3)		80423 (18.1)	80973 (18.2)		22667 (18.6)	23380 (19.1)		22655 (17.0)	25480 (19.1)
	5	211157 (18.3)	199051 (17.2)		252110 (18.8)	235818 (17.6)		242897 (18.7)	227429 (17.5)		250292 (18.7)	233245 (17.4)		103377 (27.6)	75246 (20.1)		63095 (27.8)	29089 (12.8)		60062 (27.7)	27673 (12.7)		137672 (27.7)	65361 (13.1)		105545 (13.5)	137304 (17.6)		242301 (14.2)	299196 (17.5)		14583 (12.1)	13284 (11.1)		16676 (12.9)	14049 (10.9)		68232 (17.0)	68109 (16.9)		63697 (14.3)	75113 (16.9)		21379 (17.5)	22679 (18.6)		18566 (13.9)	24541 (18.4)
	unknown	32439 (2.8)	32612 (2.8)		36828 (2.7)	36587 (2.7)		35528 (2.7)	35646 (2.7)		36597 (2.7)	36839 (2.7)		7488 (2.0)	9816 (2.6)		4566 (2.0)	4030 (1.8)		4335 (2.0)	3884 (1.8)		9746 (2.0)	9774 (2.0)		17574 (2.2)	16946 (2.2)		44185 (2.6)	38295 (2.2)		2477 (2.1)	2112 (1.8)		2353 (1.8)	2271 (1.8)		11307 (2.8)	10553 (2.6)		9999 (2.3)	11775 (2.7)		3214 (2.6)	2888 (2.4)		2800 (2.1)	3259 (2.4)
LDL_category	Moderate	94311 (8.2)	81220 (7.0)	<0.001	122172 (9.1)	106343 (7.9)	<0.001	118075 (9.1)	102611 (7.9)	<0.001	121798 (9.1)	106525 (8.0)	<0.001	56995 (15.2)	46853 (12.5)	<0.001	40634 (17.9)	28700 (12.7)	<0.001	38863 (17.9)	27447 (12.6)	<0.001	80302 (16.1)	62308 (12.5)	<0.001	82937 (10.6)	111214 (14.2)	<0.001	183405 (10.7)	239837 (14.0)	<0.001	16434 (13.7)	18768 (15.6)	<0.001	16020 (12.4)	20060 (15.6)	<0.001	35455 (8.8)	40840 (10.2)	<0.001	33851 (7.6)	44224 (10.0)	<0.001	13607 (11.1)	15649 (12.8)	<0.001	12616 (9.5)	17015 (12.8)	<0.001
	Low	40628 (3.5)	34076 (2.9)		56865 (4.2)	48042 (3.6)		55095 (4.2)	46605 (3.6)		56864 (4.2)	47581 (3.6)		36167 (9.7)	26809 (7.2)		26983 (11.9)	16665 (7.3)		25848 (11.9)	15985 (7.4)		53236 (10.7)	36613 (7.4)		45200 (5.8)	61228 (7.8)		96771 (5.7)	127969 (7.5)		10092 (8.4)	10629 (8.8)		9818 (7.6)	11136 (8.6)		17179 (4.3)	20233 (5.0)		15801 (3.6)	21196 (4.8)		7074 (5.8)	8369 (6.9)		6366 (4.8)	8834 (6.6)
	Borderline High	242414 (21.0)	208558 (18.0)		295908 (22.0)	259692 (19.3)		285439 (21.9)	249002 (19.1)		294990 (22.0)	258841 (19.3)		97385 (26.0)	95382 (25.5)		70487 (31.1)	63504 (28.0)		67278 (31.0)	60493 (27.9)		132390 (26.6)	126427 (25.4)		178679 (22.9)	228263 (29.2)		405920 (23.8)	508752 (29.8)		30347 (25.2)	35322 (29.4)		30734 (23.8)	38371 (29.8)		84191 (20.9)	96538 (24.0)		86094 (19.4)	107279 (24.2)		29919 (24.5)	32956 (27.0)		30010 (22.5)	36479 (27.4)
	High	70518 (6.1)	62215 (5.4)		86207 (6.4)	77503 (5.8)		83198 (6.4)	75477 (5.8)		86140 (6.4)	77537 (5.8)		24933 (6.7)	28779 (7.7)		18357 (8.1)	19337 (8.5)		17553 (8.1)	18310 (8.4)		33544 (6.7)	38868 (7.8)		58448 (7.5)	69872 (8.9)		131845 (7.7)	155877 (9.1)		9671 (8.0)	11423 (9.5)		9930 (7.7)	12508 (9.7)		25741 (6.4)	29743 (7.4)		26631 (6.0)	33240 (7.5)		9552 (7.8)	8728 (7.1)		9820 (7.4)	9799 (7.3)
	Unknown	708906 (61.3)	770708 (66.6)		782508 (58.2)	852080 (63.4)		758970 (58.3)	827082 (63.6)		779968 (58.2)	849276 (63.4)		158608 (42.4)	176265 (47.1)		70284 (31.0)	98539 (43.5)		67565 (31.1)	94872 (43.7)		198182 (39.8)	233438 (46.9)		416347 (53.3)	311034 (39.8)		891022 (52.1)	676528 (39.6)		53643 (44.6)	44045 (36.6)		62374 (48.4)	46801 (36.3)		239372 (59.6)	214584 (53.4)		281632 (63.4)	238070 (53.6)		61997 (50.8)	56447 (46.2)		74542 (55.9)	61227 (45.9)
HDL_category	Normal	430391 (37.2)	375397 (32.5)	<0.001	537058 (40.0)	474755 (35.3)	<0.001	519826 (40.0)	459002 (35.3)	<0.001	536215 (40.0)	474175 (35.4)	<0.001	207205 (55.4)	191945 (51.3)	<0.001	146197 (64.5)	133692 (59.0)	<0.001	140165 (64.6)	127726 (58.8)	<0.001	284962 (57.3)	267702 (53.8)	<0.001	371894 (47.6)	450026 (57.6)	<0.001	815610 (47.7)	986504 (57.7)	<0.001	65757 (54.7)	74756 (62.2)	<0.001	69599 (54.0)	80769 (62.7)	<0.001	157522 (39.2)	175125 (43.6)	<0.001	169082 (38.1)	192065 (43.3)	<0.001	58436 (47.8)	62143 (50.9)	<0.001	62176 (46.6)	68101 (51.1)	<0.001
	Low	40628 (3.5)	34076 (2.9)		56865 (4.2)	48042 (3.6)		55095 (4.2)	46605 (3.6)		56864 (4.2)	47581 (3.6)		36167 (9.7)	26809 (7.2)		26983 (11.9)	16665 (7.3)		25848 (11.9)	15985 (7.4)		53236 (10.7)	36613 (7.4)		45200 (5.8)	61228 (7.8)		96771 (5.7)	127969 (7.5)		10092 (8.4)	10629 (8.8)		9818 (7.6)	11136 (8.6)		17179 (4.3)	20233 (5.0)		15801 (3.6)	21196 (4.8)		7074 (5.8)	8369 (6.9)		6366 (4.8)	8834 (6.6)
	Unknown	708906 (61.3)	770708 (66.6)		782508 (58.2)	852080 (63.4)		758970 (58.3)	827082 (63.6)		779968 (58.2)	849276 (63.4)		158608 (42.4)	176265 (47.1)		70284 (31.0)	98539 (43.5)		67565 (31.1)	94872 (43.7)		198182 (39.8)	233438 (46.9)		416347 (53.3)	311034 (39.8)		891022 (52.1)	676528 (39.6)		53643 (44.6)	44045 (36.6)		62374 (48.4)	46801 (36.3)		239372 (59.6)	214584 (53.4)		281632 (63.4)	238070 (53.6)		61997 (50.8)	56447 (46.2)		74542 (55.9)	61227 (45.9)
sbp_category	Normal	232291 (20.1)	208701 (18.0)	<0.001	256424 (19.1)	231266 (17.2)	<0.001	247378 (19.0)	223322 (17.2)	<0.001	255124 (19.0)	230311 (17.2)	<0.001	60729 (16.2)	43327 (11.6)	<0.001	39244 (17.3)	30671 (13.5)	<0.001	37465 (17.3)	29347 (13.5)	<0.001	78219 (15.7)	58108 (11.7)	<0.001	94192 (12.1)	100990 (12.9)	<0.001	208116 (12.2)	223898 (13.1)	<0.001	12324 (10.3)	12860 (10.7)	<0.001	13221 (10.3)	13673 (10.6)	<0.001	62464 (15.5)	69095 (17.2)	<0.001	73226 (16.5)	77861 (17.5)	<0.001	17025 (13.9)	20140 (16.5)	<0.001	20034 (15.0)	22209 (16.7)	<0.001
	Low	40628 (3.5)	34076 (2.9)		56865 (4.2)	48042 (3.6)		55095 (4.2)	46605 (3.6)		56864 (4.2)	47581 (3.6)		36167 (9.7)	26809 (7.2)		26983 (11.9)	16665 (7.3)		25848 (11.9)	15985 (7.4)		53236 (10.7)	36613 (7.4)		45200 (5.8)	61228 (7.8)		96771 (5.7)	127969 (7.5)		10092 (8.4)	10629 (8.8)		9818 (7.6)	11136 (8.6)		17179 (4.3)	20233 (5.0)		15801 (3.6)	21196 (4.8)		7074 (5.8)	8369 (6.9)		6366 (4.8)	8834 (6.6)
	Elevated	469785 (40.6)	403114 (34.8)		550231 (41.0)	478805 (35.6)		531247 (40.8)	461523 (35.5)		548327 (40.9)	476666 (35.6)		158854 (42.5)	147415 (39.4)		107550 (47.4)	102263 (45.1)		102811 (47.4)	97343 (44.8)		213351 (42.9)	202714 (40.7)		293531 (37.6)	344091 (44.0)		642145 (37.6)	758519 (44.4)		46611 (38.8)	51381 (42.8)		50835 (39.4)	55410 (43.0)		147912 (36.8)	166771 (41.5)		165663 (37.3)	185655 (41.8)		46730 (38.3)	50890 (41.7)		52975 (39.7)	56128 (42.1)
	High	70518 (6.1)	62215 (5.4)		86207 (6.4)	77503 (5.8)		83198 (6.4)	75477 (5.8)		86140 (6.4)	77537 (5.8)		24933 (6.7)	28779 (7.7)		18357 (8.1)	19337 (8.5)		17553 (8.1)	18310 (8.4)		33544 (6.7)	38868 (7.8)		58448 (7.5)	69872 (8.9)		131845 (7.7)	155877 (9.1)		9671 (8.0)	11423 (9.5)		9930 (7.7)	12508 (9.7)		25741 (6.4)	29743 (7.4)		26631 (6.0)	33240 (7.5)		9552 (7.8)	8728 (7.1)		9820 (7.4)	9799 (7.3)
	Unknown	708906 (61.3)	770708 (66.6)		782508 (58.2)	852080 (63.4)		758970 (58.3)	827082 (63.6)		779968 (58.2)	849276 (63.4)		158608 (42.4)	176265 (47.1)		70284 (31.0)	98539 (43.5)		67565 (31.1)	94872 (43.7)		198182 (39.8)	233438 (46.9)		416347 (53.3)	311034 (39.8)		891022 (52.1)	676528 (39.6)		53643 (44.6)	44045 (36.6)		62374 (48.4)	46801 (36.3)		239372 (59.6)	214584 (53.4)		281632 (63.4)	238070 (53.6)		61997 (50.8)	56447 (46.2)		74542 (55.9)	61227 (45.9)
dbp_category	Normal	454901 (39.3)	405650 (35.1)	<0.001	538217 (40.1)	485105 (36.1)	<0.001	521296 (40.1)	468557 (36.0)	<0.001	536966 (40.1)	483082 (36.1)	<0.001	176945 (47.3)	150146 (40.1)	<0.001	117060 (51.6)	103065 (45.5)	<0.001	112141 (51.7)	98746 (45.5)	<0.001	241368 (48.5)	212729 (42.7)	<0.001	309713 (39.6)	351994 (45.0)	<0.001	663271 (38.8)	762111 (44.6)	<0.001	54388 (45.3)	61094 (50.8)	<0.001	59478 (46.2)	65225 (50.6)	<0.001	145662 (36.2)	161260 (40.1)	<0.001	163484 (36.8)	177419 (40.0)	<0.001	49259 (40.3)	54943 (45.0)	<0.001	56065 (42.0)	59647 (44.7)	<0.001
	Low	40628 (3.5)	34076 (2.9)		56865 (4.2)	48042 (3.6)		55095 (4.2)	46605 (3.6)		56864 (4.2)	47581 (3.6)		36167 (9.7)	26809 (7.2)		26983 (11.9)	16665 (7.3)		25848 (11.9)	15985 (7.4)		53236 (10.7)	36613 (7.4)		45200 (5.8)	61228 (7.8)		96771 (5.7)	127969 (7.5)		10092 (8.4)	10629 (8.8)		9818 (7.6)	11136 (8.6)		17179 (4.3)	20233 (5.0)		15801 (3.6)	21196 (4.8)		7074 (5.8)	8369 (6.9)		6366 (4.8)	8834 (6.6)
	Elevated	469785 (40.6)	403114 (34.8)		550231 (41.0)	478805 (35.6)		531247 (40.8)	461523 (35.5)		548327 (40.9)	476666 (35.6)		158854 (42.5)	147415 (39.4)		107550 (47.4)	102263 (45.1)		102811 (47.4)	97343 (44.8)		213351 (42.9)	202714 (40.7)		293531 (37.6)	344091 (44.0)		642145 (37.6)	758519 (44.4)		46611 (38.8)	51381 (42.8)		50835 (39.4)	55410 (43.0)		147912 (36.8)	166771 (41.5)		165663 (37.3)	185655 (41.8)		46730 (38.3)	50890 (41.7)		52975 (39.7)	56128 (42.1)
	High	70518 (6.1)	62215 (5.4)		86207 (6.4)	77503 (5.8)		83198 (6.4)	75477 (5.8)		86140 (6.4)	77537 (5.8)		24933 (6.7)	28779 (7.7)		18357 (8.1)	19337 (8.5)		17553 (8.1)	18310 (8.4)		33544 (6.7)	38868 (7.8)		58448 (7.5)	69872 (8.9)		131845 (7.7)	155877 (9.1)		9671 (8.0)	11423 (9.5)		9930 (7.7)	12508 (9.7)		25741 (6.4)	29743 (7.4)		26631 (6.0)	33240 (7.5)		9552 (7.8)	8728 (7.1)		9820 (7.4)	9799 (7.3)
	Unknown	708906 (61.3)	770708 (66.6)		782508 (58.2)	852080 (63.4)		758970 (58.3)	827082 (63.6)		779968 (58.2)	849276 (63.4)		158608 (42.4)	176265 (47.1)		70284 (31.0)	98539 (43.5)		67565 (31.1)	94872 (43.7)		198182 (39.8)	233438 (46.9)		416347 (53.3)	311034 (39.8)		891022 (52.1)	676528 (39.6)		53643 (44.6)	44045 (36.6)		62374 (48.4)	46801 (36.3)		239372 (59.6)	214584 (53.4)		281632 (63.4)	238070 (53.6)		61997 (50.8)	56447 (46.2)		74542 (55.9)	61227 (45.9)
bmi_category	Normal weight	272864 (23.6)	245817 (21.3)	<0.001	304549 (22.7)	280963 (20.9)	<0.001	295885 (22.7)	272371 (20.9)	<0.001	303618 (22.7)	279404 (20.9)	<0.001	114277 (30.5)	78500 (21.0)	<0.001	67254 (29.7)	51378 (22.7)	<0.001	64606 (29.8)	49033 (22.6)	<0.001	142812 (28.7)	103045 (20.7)	<0.001	174442 (22.3)	148061 (18.9)	<0.001	372188 (21.8)	312865 (18.3)	<0.001	27956 (23.3)	29401 (24.5)	<0.001	29092 (22.6)	30791 (23.9)	<0.001	81289 (20.2)	84761 (21.1)	<0.001	91179 (20.5)	92336 (20.8)	<0.001	26180 (21.4)	29445 (24.1)	<0.001	29330 (22.0)	31374 (23.5)	<0.001
	Underweight	13561 (1.2)	11322 (1.0)		15446 (1.1)	13140 (1.0)		15036 (1.2)	12714 (1.0)		15343 (1.1)	12997 (1.0)		17402 (4.7)	3682 (1.0)		8616 (3.8)	1990 (0.9)		8288 (3.8)	1880 (0.9)		20583 (4.1)	4436 (0.9)		11090 (1.4)	7431 (1.0)		20647 (1.2)	13624 (0.8)		1975 (1.6)	1922 (1.6)		1884 (1.5)	1816 (1.4)		3750 (0.9)	4065 (1.0)		3720 (0.8)	3998 (0.9)		1563 (1.3)	2442 (2.0)		1479 (1.1)	2314 (1.7)
	Overweight	318927 (27.6)	253340 (21.9)		371519 (27.6)	301836 (22.5)		359628 (27.6)	291498 (22.4)		370792 (27.7)	302011 (22.5)		103697 (27.7)	103405 (27.6)		68574 (30.2)	71122 (31.4)		65697 (30.3)	68207 (31.4)		140743 (28.3)	141811 (28.5)		191582 (24.5)	228495 (29.2)		424144 (24.8)	500089 (29.3)		31590 (26.3)	36358 (30.3)		35216 (27.3)	39209 (30.4)		95415 (23.7)	107957 (26.9)		107822 (24.3)	119767 (27.0)		30578 (25.0)	32408 (26.5)		34287 (25.7)	35601 (26.7)
	Obese	281453 (24.3)	179345 (15.5)		351312 (26.1)	226779 (16.9)		337464 (25.9)	216886 (16.7)		349825 (26.1)	225428 (16.8)		81633 (21.8)	69016 (18.4)		61575 (27.2)	51165 (22.6)		58409 (26.9)	48203 (22.2)		121929 (24.5)	98261 (19.7)		120272 (15.4)	220354 (28.2)		278362 (16.3)	508382 (29.7)		20729 (17.2)	25211 (21.0)		23753 (18.4)	28507 (22.1)		69689 (17.3)	91674 (22.8)		78613 (17.7)	106075 (23.9)		23295 (19.1)	26892 (22.0)		26348 (19.8)	31358 (23.5)
	Unknown	708906 (61.3)	770708 (66.6)		782508 (58.2)	852080 (63.4)		758970 (58.3)	827082 (63.6)		779968 (58.2)	849276 (63.4)		158608 (42.4)	176265 (47.1)		70284 (31.0)	98539 (43.5)		67565 (31.1)	94872 (43.7)		198182 (39.8)	233438 (46.9)		416347 (53.3)	311034 (39.8)		891022 (52.1)	676528 (39.6)		53643 (44.6)	44045 (36.6)		62374 (48.4)	46801 (36.3)		239372 (59.6)	214584 (53.4)		281632 (63.4)	238070 (53.6)		61997 (50.8)	56447 (46.2)		74542 (55.9)	61227 (45.9)
totalcholesterol_category	Desirable	308187 (26.6)	266916 (23.1)	<0.001	388267 (28.9)	339712 (25.3)	<0.001	375279 (28.9)	327011 (25.1)	<0.001	386944 (28.9)	338194 (25.2)	<0.001	166365 (44.5)	140268 (37.5)	<0.001	116549 (51.4)	93180 (41.1)	<0.001	111404 (51.3)	88918 (41.0)	<0.001	232825 (46.8)	193630 (38.9)	<0.001	256938 (32.9)	329407 (42.1)	<0.001	555518 (32.5)	711436 (41.6)	<0.001	47803 (39.8)	53692 (44.7)	<0.001	50471 (39.2)	57076 (44.3)	<0.001	112145 (27.9)	128505 (32.0)	<0.001	119282 (26.9)	139507 (31.4)	<0.001	40525 (33.2)	49122 (40.2)	<0.001	41172 (30.9)	53038 (39.8)	<0.001
	Borderline High	242414 (21.0)	208558 (18.0)		295908 (22.0)	259692 (19.3)		285439 (21.9)	249002 (19.1)		294990 (22.0)	258841 (19.3)		97385 (26.0)	95382 (25.5)		70487 (31.1)	63504 (28.0)		67278 (31.0)	60493 (27.9)		132390 (26.6)	126427 (25.4)		178679 (22.9)	228263 (29.2)		405920 (23.8)	508752 (29.8)		30347 (25.2)	35322 (29.4)		30734 (23.8)	38371 (29.8)		84191 (20.9)	96538 (24.0)		86094 (19.4)	107279 (24.2)		29919 (24.5)	32956 (27.0)		30010 (22.5)	36479 (27.4)
	High	70518 (6.1)	62215 (5.4)		86207 (6.4)	77503 (5.8)		83198 (6.4)	75477 (5.8)		86140 (6.4)	77537 (5.8)		24933 (6.7)	28779 (7.7)		18357 (8.1)	19337 (8.5)		17553 (8.1)	18310 (8.4)		33544 (6.7)	38868 (7.8)		58448 (7.5)	69872 (8.9)		131845 (7.7)	155877 (9.1)		9671 (8.0)	11423 (9.5)		9930 (7.7)	12508 (9.7)		25741 (6.4)	29743 (7.4)		26631 (6.0)	33240 (7.5)		9552 (7.8)	8728 (7.1)		9820 (7.4)	9799 (7.3)
	Unknown	708906 (61.3)	770708 (66.6)		782508 (58.2)	852080 (63.4)		758970 (58.3)	827082 (63.6)		779968 (58.2)	849276 (63.4)		158608 (42.4)	176265 (47.1)		70284 (31.0)	98539 (43.5)		67565 (31.1)	94872 (43.7)		198182 (39.8)	233438 (46.9)		416347 (53.3)	311034 (39.8)		891022 (52.1)	676528 (39.6)		53643 (44.6)	44045 (36.6)		62374 (48.4)	46801 (36.3)		239372 (59.6)	214584 (53.4)		281632 (63.4)	238070 (53.6)		61997 (50.8)	56447 (46.2)		74542 (55.9)	61227 (45.9)
smoking_status_final	non_smoker	320489 (27.7)	352929 (30.5)	<0.001	363327 (27.0)	404993 (30.1)	<0.001	355004 (27.3)	395385 (30.4)	<0.001	362612 (27.1)	405056 (30.2)	<0.001	16375 (4.4)	100289 (26.8)	<0.001	10114 (4.5)	69261 (30.5)	<0.001	10060 (4.6)	67068 (30.9)	<0.001	24001 (4.8)	143822 (28.9)	<0.001	227508 (29.1)	232227 (29.7)	<0.001	500307 (29.3)	515021 (30.1)	<0.001	34412 (28.6)	36232 (30.1)	<0.001	39092 (30.3)	39910 (31.0)	<0.001	118434 (29.5)	102140 (25.4)	<0.001	141287 (31.8)	114240 (25.7)	<0.001	36216 (29.6)	33081 (27.1)	<0.001	43489 (32.6)	37265 (27.9)	<0.001
	active_smoker	336255 (29.1)	292919 (25.3)		382918 (28.5)	334738 (24.9)		367084 (28.2)	320410 (24.6)		380828 (28.4)	333799 (24.9)		192574 (51.5)	85108 (22.8)		128516 (56.7)	48645 (21.5)		122247 (56.3)	45739 (21.1)		245193 (49.3)	100298 (20.2)		167388 (21.4)	180207 (23.1)		356384 (20.9)	384364 (22.5)		21580 (18.0)	22250 (18.5)		22591 (17.5)	22763 (17.7)		99214 (24.7)	127330 (31.7)		104840 (23.6)	138660 (31.2)		27418 (22.4)	32517 (26.6)		28175 (21.1)	34374 (25.8)
	ex_smoker	416788 (36.0)	320551 (27.7)		501854 (37.3)	391834 (29.2)		485033 (37.3)	376395 (28.9)		501009 (37.4)	389292 (29.1)		140717 (37.6)	137544 (36.8)		83378 (36.8)	91510 (40.4)		80144 (36.9)	87337 (40.2)		197987 (39.8)	194764 (39.1)		266325 (34.1)	325949 (41.7)		582450 (34.1)	718979 (42.1)		47943 (39.9)	55000 (45.8)		50100 (38.9)	59248 (46.0)		123869 (30.8)	149703 (37.2)		135398 (30.5)	166645 (37.5)		41584 (34.0)	47870 (39.2)		45801 (34.3)	52609 (39.5)
	unknown	32439 (2.8)	32612 (2.8)		36828 (2.7)	36587 (2.7)		35528 (2.7)	35646 (2.7)		36597 (2.7)	36839 (2.7)		7488 (2.0)	9816 (2.6)		4566 (2.0)	4030 (1.8)		4335 (2.0)	3884 (1.8)		9746 (2.0)	9774 (2.0)		17574 (2.2)	16946 (2.2)		44185 (2.6)	38295 (2.2)		2477 (2.1)	2112 (1.8)		2353 (1.8)	2271 (1.8)		11307 (2.8)	10553 (2.6)		9999 (2.3)	11775 (2.7)		3214 (2.6)	2888 (2.4)		2800 (2.1)	3259 (2.4)
pa_level	pa_level0	86718 (7.5)	66984 (5.8)	<0.001	113632 (8.5)	87367 (6.5)	<0.001	109885 (8.4)	84698 (6.5)	<0.001	112730 (8.4)	86613 (6.5)	<0.001	53205 (14.2)	32058 (8.6)	<0.001	38872 (17.1)	23954 (10.6)	<0.001	37123 (17.1)	22897 (10.5)	<0.001	77323 (15.5)	44674 (9.0)	<0.001	60384 (7.7)	88439 (11.3)	<0.001	130323 (7.6)	191329 (11.2)	<0.001	12052 (10.0)	13586 (11.3)	<0.001	13203 (10.2)	14441 (11.2)	<0.001	27662 (6.9)	33327 (8.3)	<0.001	29080 (6.5)	36230 (8.2)	<0.001	10737 (8.8)	15262 (12.5)	<0.001	11029 (8.3)	16645 (12.5)	<0.001
	pa_level1	214498 (18.5)	178071 (15.4)		260313 (19.4)	219910 (16.4)		252070 (19.4)	212013 (16.3)		259542 (19.4)	219836 (16.4)		88995 (23.8)	73994 (19.8)		56775 (25.0)	44457 (19.6)		54262 (25.0)	42412 (19.5)		122110 (24.5)	99100 (19.9)		144362 (18.5)	180659 (23.1)		314357 (18.4)	393658 (23.0)		25377 (21.1)	28342 (23.6)		26893 (20.9)	30469 (23.6)		67478 (16.8)	77857 (19.4)		72585 (16.3)	85570 (19.3)		23912 (19.6)	26228 (21.5)		23863 (17.9)	28745 (21.6)
	pa_level2	176359 (15.2)	163704 (14.2)		200556 (14.9)	190073 (14.1)		193599 (14.9)	183215 (14.1)		200153 (14.9)	189586 (14.2)		48792 (13.0)	63905 (17.1)		39655 (17.5)	49991 (22.0)		37828 (17.4)	47918 (22.1)		63505 (12.8)	86525 (17.4)		120353 (15.4)	128814 (16.5)		273326 (16.0)	290755 (17.0)		17287 (14.4)	18403 (15.3)		18482 (14.3)	20140 (15.6)		59803 (14.9)	62677 (15.6)		68227 (15.4)	70247 (15.8)		18774 (15.4)	16821 (13.8)		21201 (15.9)	18733 (14.0)
	pa_level3	44508 (3.8)	37420 (3.2)		48818 (3.6)	41474 (3.1)		47207 (3.6)	39992 (3.1)		48692 (3.6)	41571 (3.1)		6737 (1.8)	9360 (2.5)		4362 (1.9)	5342 (2.4)		4125 (1.9)	5145 (2.4)		8560 (1.7)	11136 (2.2)		16608 (2.1)	20432 (2.6)		39955 (2.3)	45950 (2.7)		2251 (1.9)	2460 (2.0)		2169 (1.7)	2657 (2.1)		12071 (3.0)	13226 (3.3)		12556 (2.8)	14924 (3.4)		2977 (2.4)	2621 (2.1)		3109 (2.3)	2929 (2.2)
	unknown	32439 (2.8)	32612 (2.8)		36828 (2.7)	36587 (2.7)		35528 (2.7)	35646 (2.7)		36597 (2.7)	36839 (2.7)		7488 (2.0)	9816 (2.6)		4566 (2.0)	4030 (1.8)		4335 (2.0)	3884 (1.8)		9746 (2.0)	9774 (2.0)		17574 (2.2)	16946 (2.2)		44185 (2.6)	38295 (2.2)		2477 (2.1)	2112 (1.8)		2353 (1.8)	2271 (1.8)		11307 (2.8)	10553 (2.6)		9999 (2.3)	11775 (2.7)		3214 (2.6)	2888 (2.4)		2800 (2.1)	3259 (2.4)
triglyceride_category	Normal	335531 (29.0)	294653 (25.5)	<0.001	417271 (31.1)	372595 (27.7)	<0.001	404015 (31.1)	359833 (27.7)	<0.001	416028 (31.1)	371312 (27.7)	<0.001	158478 (42.4)	148398 (39.7)	<0.001	109278 (48.2)	96375 (42.5)	<0.001	104740 (48.2)	92064 (42.4)	<0.001	217743 (43.8)	200921 (40.4)	<0.001	283675 (36.3)	344502 (44.1)	<0.001	630085 (36.9)	753306 (44.1)	<0.001	51053 (42.5)	56417 (46.9)	<0.001	52586 (40.8)	60716 (47.1)	<0.001	121271 (30.2)	132355 (32.9)	<0.001	126028 (28.4)	144864 (32.6)	<0.001	45641 (37.4)	50200 (41.1)	<0.001	45875 (34.4)	54794 (41.1)	<0.001
	Borderline High	242414 (21.0)	208558 (18.0)		295908 (22.0)	259692 (19.3)		285439 (21.9)	249002 (19.1)		294990 (22.0)	258841 (19.3)		97385 (26.0)	95382 (25.5)		70487 (31.1)	63504 (28.0)		67278 (31.0)	60493 (27.9)		132390 (26.6)	126427 (25.4)		178679 (22.9)	228263 (29.2)		405920 (23.8)	508752 (29.8)		30347 (25.2)	35322 (29.4)		30734 (23.8)	38371 (29.8)		84191 (20.9)	96538 (24.0)		86094 (19.4)	107279 (24.2)		29919 (24.5)	32956 (27.0)		30010 (22.5)	36479 (27.4)
	High	70518 (6.1)	62215 (5.4)		86207 (6.4)	77503 (5.8)		83198 (6.4)	75477 (5.8)		86140 (6.4)	77537 (5.8)		24933 (6.7)	28779 (7.7)		18357 (8.1)	19337 (8.5)		17553 (8.1)	18310 (8.4)		33544 (6.7)	38868 (7.8)		58448 (7.5)	69872 (8.9)		131845 (7.7)	155877 (9.1)		9671 (8.0)	11423 (9.5)		9930 (7.7)	12508 (9.7)		25741 (6.4)	29743 (7.4)		26631 (6.0)	33240 (7.5)		9552 (7.8)	8728 (7.1)		9820 (7.4)	9799 (7.3)
	Unknown	708906 (61.3)	770708 (66.6)		782508 (58.2)	852080 (63.4)		758970 (58.3)	827082 (63.6)		779968 (58.2)	849276 (63.4)		158608 (42.4)	176265 (47.1)		70284 (31.0)	98539 (43.5)		67565 (31.1)	94872 (43.7)		198182 (39.8)	233438 (46.9)		416347 (53.3)	311034 (39.8)		891022 (52.1)	676528 (39.6)		53643 (44.6)	44045 (36.6)		62374 (48.4)	46801 (36.3)		239372 (59.6)	214584 (53.4)		281632 (63.4)	238070 (53.6)		61997 (50.8)	56447 (46.2)		74542 (55.9)	61227 (45.9)
alcohol_consumption_level	0	85553 (7.4)	72441 (6.3)	<0.001	105047 (7.8)	88555 (6.6)	<0.001	101878 (7.8)	86074 (6.6)	<0.001	104380 (7.8)	88135 (6.6)	<0.001	33215 (8.9)	25843 (6.9)	<0.001	20356 (9.0)	16911 (7.5)	<0.001	19609 (9.0)	16193 (7.5)	<0.001	46040 (9.3)	34227 (6.9)	<0.001	54267 (6.9)	66391 (8.5)	<0.001	119226 (7.0)	145383 (8.5)	<0.001	9620 (8.0)	10936 (9.1)	<0.001	11788 (9.1)	11857 (9.2)	<0.001	25233 (6.3)	27474 (6.8)	<0.001	31198 (7.0)	30671 (6.9)	<0.001	9541 (7.8)	12577 (10.3)	<0.001	11488 (8.6)	13943 (10.5)	<0.001
	1	852696 (73.7)	753351 (65.1)		992784 (73.9)	885065 (65.9)		960044 (73.8)	853990 (65.7)		990061 (73.9)	882999 (65.9)		274912 (73.5)	259388 (69.3)		180269 (79.5)	172637 (76.1)		172482 (79.4)	164999 (76.0)		369170 (74.2)	357697 (71.9)		525561 (67.2)	600666 (76.8)		1141320 (66.8)	1319923 (77.2)		82837 (68.9)	91428 (76.1)		88439 (68.6)	98292 (76.3)		269596 (67.1)	303961 (75.6)		300184 (67.6)	336381 (75.8)		83213 (68.1)	89068 (72.9)		92776 (69.6)	97649 (73.2)
	2	619188 (53.5)	619188 (53.5)		744790 (55.4)	744790 (55.4)		723380 (55.6)	723380 (55.6)		741759 (55.4)	741759 (55.4)		166319 (44.5)	166319 (44.5)		105046 (46.3)	105046 (46.3)		100722 (46.4)	100722 (46.4)		233540 (46.9)	233540 (46.9)		468454 (59.9)	468454 (59.9)		1035094 (60.6)	1035094 (60.6)		81156 (67.5)	81156 (67.5)		88683 (68.8)	88683 (68.8)		196217 (48.8)	196217 (48.8)		221094 (49.8)	221094 (49.8)		83655 (68.5)	83655 (68.5)		93610 (70.2)	93610 (70.2)
	3	218153 (18.9)	220952 (19.1)		253085 (18.8)	257024 (19.1)		245266 (18.9)	248403 (19.1)		252583 (18.9)	256197 (19.1)		67953 (18.2)	71064 (19.0)		41042 (18.1)	42708 (18.8)		39351 (18.1)	41130 (18.9)		90023 (18.1)	95646 (19.2)		151255 (19.4)	150609 (19.3)		333712 (19.5)	328690 (19.2)		24255 (20.2)	24434 (20.3)		24208 (18.8)	26141 (20.3)		77301 (19.2)	77456 (19.3)		85103 (19.2)	85537 (19.3)		23371 (19.1)	23704 (19.4)		23642 (17.7)	25910 (19.4)
	unknown	32439 (2.8)	32612 (2.8)		36828 (2.7)	36587 (2.7)		35528 (2.7)	35646 (2.7)		36597 (2.7)	36839 (2.7)		7488 (2.0)	9816 (2.6)		4566 (2.0)	4030 (1.8)		4335 (2.0)	3884 (1.8)		9746 (2.0)	9774 (2.0)		17574 (2.2)	16946 (2.2)		44185 (2.6)	38295 (2.2)		2477 (2.1)	2112 (1.8)		2353 (1.8)	2271 (1.8)		11307 (2.8)	10553 (2.6)		9999 (2.3)	11775 (2.7)		3214 (2.6)	2888 (2.4)		2800 (2.1)	3259 (2.4)
albumin_category	Normal	638777 (55.2)	543019 (46.9)	<0.001	776262 (57.8)	670580 (49.9)	<0.001	749103 (57.6)	646500 (49.7)	<0.001	773303 (57.7)	667564 (49.8)	<0.001	265623 (71.0)	233911 (62.5)	<0.001	182847 (80.6)	158846 (70.1)	<0.001	174766 (80.5)	151405 (69.7)	<0.001	362737 (72.9)	323990 (65.1)	<0.001	457939 (58.6)	571518 (73.1)	<0.001	1002871 (58.7)	1257867 (73.6)	<0.001	79992 (66.6)	91582 (76.2)	<0.001	85685 (66.5)	98867 (76.7)	<0.001	211402 (52.6)	247891 (61.7)	<0.001	229885 (51.8)	274581 (61.8)	<0.001	74394 (60.9)	89718 (73.4)	<0.001	80981 (60.7)	98759 (74.1)	<0.001
	Low	40628 (3.5)	34076 (2.9)		56865 (4.2)	48042 (3.6)		55095 (4.2)	46605 (3.6)		56864 (4.2)	47581 (3.6)		36167 (9.7)	26809 (7.2)		26983 (11.9)	16665 (7.3)		25848 (11.9)	15985 (7.4)		53236 (10.7)	36613 (7.4)		45200 (5.8)	61228 (7.8)		96771 (5.7)	127969 (7.5)		10092 (8.4)	10629 (8.8)		9818 (7.6)	11136 (8.6)		17179 (4.3)	20233 (5.0)		15801 (3.6)	21196 (4.8)		7074 (5.8)	8369 (6.9)		6366 (4.8)	8834 (6.6)
	High	70518 (6.1)	62215 (5.4)		86207 (6.4)	77503 (5.8)		83198 (6.4)	75477 (5.8)		86140 (6.4)	77537 (5.8)		24933 (6.7)	28779 (7.7)		18357 (8.1)	19337 (8.5)		17553 (8.1)	18310 (8.4)		33544 (6.7)	38868 (7.8)		58448 (7.5)	69872 (8.9)		131845 (7.7)	155877 (9.1)		9671 (8.0)	11423 (9.5)		9930 (7.7)	12508 (9.7)		25741 (6.4)	29743 (7.4)		26631 (6.0)	33240 (7.5)		9552 (7.8)	8728 (7.1)		9820 (7.4)	9799 (7.3)
	Unknown	708906 (61.3)	770708 (66.6)		782508 (58.2)	852080 (63.4)		758970 (58.3)	827082 (63.6)		779968 (58.2)	849276 (63.4)		158608 (42.4)	176265 (47.1)		70284 (31.0)	98539 (43.5)		67565 (31.1)	94872 (43.7)		198182 (39.8)	233438 (46.9)		416347 (53.3)	311034 (39.8)		891022 (52.1)	676528 (39.6)		53643 (44.6)	44045 (36.6)		62374 (48.4)	46801 (36.3)		239372 (59.6)	214584 (53.4)		281632 (63.4)	238070 (53.6)		61997 (50.8)	56447 (46.2)		74542 (55.9)	61227 (45.9)
ethnicity_16cat	British	924156 (79.9)	818835 (70.8)	<0.001	1084435 (80.7)	974966 (72.6)	<0.001	1047834 (80.6)	940129 (72.3)	<0.001	1081994 (80.8)	972490 (72.6)	<0.001	336542 (90.0)	299287 (80.0)	<0.001	203919 (89.9)	185744 (81.9)	<0.001	195107 (89.9)	177460 (81.7)	<0.001	450163 (90.5)	409620 (82.3)	<0.001	627778 (80.3)	670178 (85.7)	<0.001	1351262 (79.1)	1454357 (85.1)	<0.001	104542 (87.0)	110407 (91.9)	<0.001	110040 (85.4)	117963 (91.5)	<0.001	302004 (75.1)	334328 (83.2)	<0.001	325299 (73.3)	369346 (83.2)	<0.001	96604 (79.1)	102496 (83.9)	<0.001	109176 (81.9)	111051 (83.3)	<0.001
	Irish	10562 (0.9)	9687 (0.8)		12684 (0.9)	11298 (0.8)		12153 (0.9)	10994 (0.8)		12676 (0.9)	11287 (0.8)		6189 (1.7)	3728 (1.0)		3431 (1.5)	2136 (0.9)		3285 (1.5)	1958 (0.9)		8095 (1.6)	4494 (0.9)		7002 (0.9)	7376 (0.9)		16127 (0.9)	15891 (0.9)		1089 (0.9)	1103 (0.9)		1236 (1.0)	1188 (0.9)		3533 (0.9)	4923 (1.2)		3794 (0.9)	5262 (1.2)		1168 (1.0)	1252 (1.0)		1076 (0.8)	1332 (1.0)
	Other White	39961 (3.5)	72707 (6.3)		44464 (3.3)	78762 (5.9)		43272 (3.3)	76248 (5.9)		44279 (3.3)	77934 (5.8)		9373 (2.5)	12252 (3.3)		5981 (2.6)	6426 (2.8)		5756 (2.7)	6230 (2.9)		11868 (2.4)	13741 (2.8)		24150 (3.1)	20770 (2.7)		57474 (3.4)	46376 (2.7)		2690 (2.2)	2095 (1.7)		2841 (2.2)	2313 (1.8)		20289 (5.0)	15010 (3.7)		21808 (4.9)	16262 (3.7)		4707 (3.9)	3841 (3.1)		4237 (3.2)	4191 (3.1)
	White and Black Caribbean	3558 (0.3)	2639 (0.2)		3980 (0.3)	3045 (0.2)		3900 (0.3)	3074 (0.2)		3937 (0.3)	3075 (0.2)		466 (0.1)	690 (0.2)		282 (0.1)	383 (0.2)		281 (0.1)	364 (0.2)		555 (0.1)	799 (0.2)		1190 (0.2)	1394 (0.2)		2966 (0.2)	3319 (0.2)		125 (0.1)	79 (0.1)		169 (0.1)	100 (0.1)		800 (0.2)	475 (0.1)		1036 (0.2)	564 (0.1)		232 (0.2)	242 (0.2)		216 (0.2)	311 (0.2)
	White and Black African	1906 (0.2)	2854 (0.2)		2088 (0.2)	3174 (0.2)		2064 (0.2)	3033 (0.2)		2074 (0.2)	3173 (0.2)		196 (0.1)	459 (0.1)		125 (0.1)	236 (0.1)		120 (0.1)	261 (0.1)		252 (0.1)	452 (0.1)		793 (0.1)	875 (0.1)		1971 (0.1)	1981 (0.1)		72 (0.1)	40 (0.0)		82 (0.1)	54 (0.0)		835 (0.2)	270 (0.1)		912 (0.2)	299 (0.1)		211 (0.2)	153 (0.1)		167 (0.1)	182 (0.1)
	White and Asian	2203 (0.2)	2176 (0.2)		2373 (0.2)	2373 (0.2)		2309 (0.2)	2259 (0.2)		2366 (0.2)	2356 (0.2)		240 (0.1)	434 (0.1)		160 (0.1)	237 (0.1)		155 (0.1)	227 (0.1)		299 (0.1)	502 (0.1)		785 (0.1)	680 (0.1)		1897 (0.1)	1548 (0.1)		67 (0.1)	51 (0.0)		91 (0.1)	63 (0.0)		644 (0.2)	565 (0.1)		717 (0.2)	651 (0.1)		151 (0.1)	148 (0.1)		168 (0.1)	174 (0.1)
	Other Mixed	4895 (0.4)	5353 (0.5)		5303 (0.4)	5894 (0.4)		5168 (0.4)	5759 (0.4)		5260 (0.4)	5824 (0.4)		639 (0.2)	992 (0.3)		399 (0.2)	513 (0.2)		380 (0.2)	478 (0.2)		764 (0.2)	1027 (0.2)		1791 (0.2)	1589 (0.2)		4474 (0.3)	3743 (0.2)		181 (0.2)	142 (0.1)		184 (0.1)	162 (0.1)		1580 (0.4)	1120 (0.3)		1740 (0.4)	1286 (0.3)		375 (0.3)	354 (0.3)		363 (0.3)	414 (0.3)
	Indian	24885 (2.2)	26286 (2.3)		29559 (2.2)	30296 (2.3)		28738 (2.2)	29404 (2.3)		29194 (2.2)	29953 (2.2)		2628 (0.7)	6023 (1.6)		1687 (0.7)	4931 (2.2)		1622 (0.7)	4871 (2.2)		3583 (0.7)	8887 (1.8)		11708 (1.5)	15238 (1.9)		28770 (1.7)	36034 (2.1)		1175 (1.0)	936 (0.8)		1965 (1.5)	1119 (0.9)		7898 (2.0)	7042 (1.8)		11881 (2.7)	8094 (1.8)		2450 (2.0)	3109 (2.5)		2612 (2.0)	3660 (2.7)
	Pakistani	15742 (1.4)	14244 (1.2)		18407 (1.4)	16085 (1.2)		17952 (1.4)	15805 (1.2)		18236 (1.4)	16107 (1.2)		1770 (0.5)	3085 (0.8)		1212 (0.5)	1805 (0.8)		1166 (0.5)	1728 (0.8)		2393 (0.5)	3376 (0.7)		4610 (0.6)	7509 (1.0)		11943 (0.7)	18491 (1.1)		496 (0.4)	461 (0.4)		648 (0.5)	587 (0.5)		4144 (1.0)	3567 (0.9)		5706 (1.3)	4166 (0.9)		1116 (0.9)	1461 (1.2)		1046 (0.8)	1764 (1.3)
	Bangladeshi	5619 (0.5)	5498 (0.5)		6362 (0.5)	6173 (0.5)		6195 (0.5)	6006 (0.5)		6304 (0.5)	6157 (0.5)		934 (0.2)	1206 (0.3)		575 (0.3)	391 (0.2)		543 (0.3)	374 (0.2)		1201 (0.2)	856 (0.2)		1246 (0.2)	2541 (0.3)		3771 (0.2)	6055 (0.4)		136 (0.1)	173 (0.1)		151 (0.1)	202 (0.2)		1564 (0.4)	1533 (0.4)		1104 (0.2)	1743 (0.4)		386 (0.3)	472 (0.4)		337 (0.3)	570 (0.4)
	Other Asian	14613 (1.3)	18390 (1.6)		16325 (1.2)	19814 (1.5)		15924 (1.2)	19299 (1.5)		16207 (1.2)	19720 (1.5)		1442 (0.4)	3417 (0.9)		953 (0.4)	2075 (0.9)		928 (0.4)	2064 (1.0)		1860 (0.4)	4078 (0.8)		6533 (0.8)	6153 (0.8)		16794 (1.0)	14447 (0.8)		607 (0.5)	365 (0.3)		755 (0.6)	440 (0.3)		5276 (1.3)	3698 (0.9)		6835 (1.5)	4216 (0.9)		1320 (1.1)	1301 (1.1)		1153 (0.9)	1517 (1.1)
	Caribbean	15458 (1.3)	12978 (1.1)		18124 (1.3)	15335 (1.1)		17912 (1.4)	15251 (1.2)		17931 (1.3)	15376 (1.1)		2241 (0.6)	4539 (1.2)		1484 (0.7)	2144 (0.9)		1453 (0.7)	2116 (1.0)		2951 (0.6)	5096 (1.0)		7829 (1.0)	9140 (1.2)		19785 (1.2)	21144 (1.2)		707 (0.6)	376 (0.3)		1185 (0.9)	446 (0.3)		3934 (1.0)	1640 (0.4)		5809 (1.3)	1912 (0.4)		1453 (1.2)	1450 (1.2)		844 (0.6)	1711 (1.3)
	African	13154 (1.1)	23366 (2.0)		14653 (1.1)	25639 (1.9)		14551 (1.1)	25463 (2.0)		14575 (1.1)	25621 (1.9)		878 (0.2)	4294 (1.1)		626 (0.3)	1824 (0.8)		612 (0.3)	1726 (0.8)		1097 (0.2)	3969 (0.8)		6732 (0.9)	8415 (1.1)		17318 (1.0)	19284 (1.1)		458 (0.4)	303 (0.3)		614 (0.5)	359 (0.3)		6369 (1.6)	1530 (0.4)		8405 (1.9)	1702 (0.4)		1593 (1.3)	973 (0.8)		984 (0.7)	1136 (0.9)
	Other Black	7012 (0.6)	7453 (0.6)		7731 (0.6)	8163 (0.6)		7638 (0.6)	7926 (0.6)		7685 (0.6)	7967 (0.6)		585 (0.2)	1451 (0.4)		406 (0.2)	822 (0.4)		406 (0.2)	728 (0.3)		757 (0.2)	1466 (0.3)		2349 (0.3)	2997 (0.4)		6064 (0.4)	6938 (0.4)		193 (0.2)	129 (0.1)		329 (0.3)	156 (0.1)		2022 (0.5)	790 (0.2)		2427 (0.5)	924 (0.2)		534 (0.4)	474 (0.4)		556 (0.4)	561 (0.4)
	Chinese	2982 (0.3)	6898 (0.6)		3253 (0.2)	7342 (0.5)		3176 (0.2)	7419 (0.6)		3237 (0.2)	7395 (0.6)		353 (0.1)	1427 (0.4)		212 (0.1)	772 (0.3)		204 (0.1)	758 (0.3)		417 (0.1)	1523 (0.3)		2943 (0.4)	1479 (0.2)		6639 (0.4)	3266 (0.2)		280 (0.2)	83 (0.1)		293 (0.2)	94 (0.1)		1952 (0.5)	1106 (0.3)		2168 (0.5)	1200 (0.3)		490 (0.4)	305 (0.2)		591 (0.4)	325 (0.2)
	Other Ethnic group	10380 (0.9)	16845 (1.5)		11510 (0.9)	18214 (1.4)		11232 (0.9)	17802 (1.4)		11446 (0.9)	18196 (1.4)		1502 (0.4)	3100 (0.8)		972 (0.4)	1701 (0.8)		952 (0.4)	1651 (0.8)		1878 (0.4)	3335 (0.7)		5740 (0.7)	5055 (0.6)		14088 (0.8)	11348 (0.7)		574 (0.5)	413 (0.3)		697 (0.5)	443 (0.3)		4694 (1.2)	3357 (0.8)		5054 (1.1)	3701 (0.8)		1125 (0.9)	922 (0.8)		1194 (0.9)	1056 (0.8)
	Unknown	708906 (61.3)	770708 (66.6)		782508 (58.2)	852080 (63.4)		758970 (58.3)	827082 (63.6)		779968 (58.2)	849276 (63.4)		158608 (42.4)	176265 (47.1)		70284 (31.0)	98539 (43.5)		67565 (31.1)	94872 (43.7)		198182 (39.8)	233438 (46.9)		416347 (53.3)	311034 (39.8)		891022 (52.1)	676528 (39.6)		53643 (44.6)	44045 (36.6)		62374 (48.4)	46801 (36.3)		239372 (59.6)	214584 (53.4)		281632 (63.4)	238070 (53.6)		61997 (50.8)	56447 (46.2)		74542 (55.9)	61227 (45.9)
region	London	191822 (16.6)	196564 (17.0)	<0.001	217519 (16.2)	222355 (16.5)	<0.001	210930 (16.2)	215787 (16.6)	<0.001	216230 (16.1)	221292 (16.5)	<0.001	52424 (14.0)	53429 (14.3)	<0.001	31084 (13.7)	25489 (11.2)	<0.001	29765 (13.7)	24052 (11.1)	<0.001	67076 (13.5)	55816 (11.2)	<0.001	96107 (12.3)	102396 (13.1)	<0.001	251691 (14.7)	227046 (13.3)	<0.001	11535 (9.6)	10926 (9.1)	0.006	13124 (10.2)	11815 (9.2)	<0.001	61461 (15.3)	60280 (15.0)	0.028	73927 (16.6)	66877 (15.1)	<0.001	18359 (15.0)	18293 (15.0)	0.993	11466 (8.6)	20338 (15.3)	<0.001
	E	59354 (5.1)	58965 (5.1)		67525 (5.0)	67268 (5.0)		65453 (5.0)	65144 (5.0)		67578 (5.0)	67359 (5.0)		14668 (3.9)	15065 (4.0)		8773 (3.9)	12430 (5.5)		8502 (3.9)	12136 (5.6)		19392 (3.9)	26219 (5.3)		41741 (5.3)	36504 (4.7)		88742 (5.2)	79991 (4.7)		7823 (6.5)	8028 (6.7)		7962 (6.2)	8681 (6.7)		20907 (5.2)	21071 (5.2)		25599 (5.8)	23465 (5.3)		5722 (4.7)	5629 (4.6)		6632 (5.0)	6196 (4.6)
	E_Midlands	28558 (2.5)	28086 (2.4)		33250 (2.5)	32777 (2.4)		32109 (2.5)	31756 (2.4)		33129 (2.5)	32670 (2.4)		8462 (2.3)	8474 (2.3)		5297 (2.3)	8594 (3.8)		5026 (2.3)	8321 (3.8)		11427 (2.3)	14230 (2.9)		21078 (2.7)	19437 (2.5)		41176 (2.4)	42556 (2.5)		2856 (2.4)	2885 (2.4)		4522 (3.5)	3114 (2.4)		9340 (2.3)	9301 (2.3)		14897 (3.4)	10347 (2.3)		2598 (2.1)	2566 (2.1)		6836 (5.1)	2879 (2.2)
	NE	34858 (3.0)	34603 (3.0)		42657 (3.2)	42459 (3.2)		40987 (3.2)	40735 (3.1)		42353 (3.2)	42173 (3.1)		16480 (4.4)	15482 (4.1)		10729 (4.7)	1166 (0.5)		10145 (4.7)	1047 (0.5)		23854 (4.8)	11529 (2.3)		21521 (2.8)	32385 (4.1)		50061 (2.9)	69046 (4.0)		3230 (2.7)	3145 (2.6)		1264 (1.0)	3295 (2.6)		14082 (3.5)	14290 (3.6)		1125 (0.3)	15485 (3.5)		4597 (3.8)	4613 (3.8)		1170 (0.9)	4899 (3.7)
	NI	3451 (0.3)	3532 (0.3)		3928 (0.3)	3993 (0.3)		3753 (0.3)	3836 (0.3)		3898 (0.3)	3999 (0.3)		1692 (0.5)	1590 (0.4)		1122 (0.5)	0 (0.0)		1044 (0.5)	0 (0.0)		2084 (0.4)	0 (0.0)		277 (0.0)	2223 (0.3)		3670 (0.2)	4862 (0.3)		302 (0.3)	297 (0.2)		0 (0.0)	306 (0.2)		1739 (0.4)	1816 (0.5)		0 (0.0)	1969 (0.4)		467 (0.4)	469 (0.4)		0 (0.0)	506 (0.4)
	NW	210163 (18.2)	207687 (18.0)		252903 (18.8)	249315 (18.6)		243305 (18.7)	239783 (18.4)		251780 (18.8)	248170 (18.5)		84500 (22.6)	81738 (21.8)		52963 (23.4)	30938 (13.6)		50493 (23.3)	29276 (13.5)		116714 (23.5)	72087 (14.5)		115729 (14.8)	162920 (20.8)		280177 (16.4)	354969 (20.8)		20545 (17.1)	20365 (16.9)		17689 (13.7)	21673 (16.8)		80160 (19.9)	81070 (20.2)		51718 (11.6)	89198 (20.1)		22769 (18.6)	22919 (18.8)		21205 (15.9)	24788 (18.6)
	Scentral	147629 (12.8)	147369 (12.7)		167034 (12.4)	167269 (12.4)		162105 (12.5)	162330 (12.5)		167089 (12.5)	167286 (12.5)		38105 (10.2)	39208 (10.5)		23394 (10.3)	48271 (21.3)		22381 (10.3)	46596 (21.5)		49258 (9.9)	76523 (15.4)		115649 (14.8)	86738 (11.1)		226641 (13.3)	190512 (11.1)		15632 (13.0)	15807 (13.2)		26024 (20.2)	17255 (13.4)		47074 (11.7)	46941 (11.7)		90211 (20.3)	52464 (11.8)		13294 (10.9)	13182 (10.8)		31564 (23.7)	14546 (10.9)
	SE_coast	103286 (8.9)	104041 (9.0)		117544 (8.7)	118601 (8.8)		114176 (8.8)	115127 (8.9)		117492 (8.8)	118407 (8.8)		33463 (8.9)	34103 (9.1)		18962 (8.4)	16505 (7.3)		18238 (8.4)	15792 (7.3)		42717 (8.6)	43186 (8.7)		72446 (9.3)	67651 (8.7)		171346 (10.0)	146239 (8.6)		13400 (11.1)	13587 (11.3)		9090 (7.1)	14368 (11.1)		37096 (9.2)	37047 (9.2)		32199 (7.3)	40726 (9.2)		11419 (9.3)	11374 (9.3)		7780 (5.8)	12323 (9.2)
	SW	152154 (13.2)	150627 (13.0)		174649 (13.0)	173480 (12.9)		169569 (13.0)	168274 (12.9)		174477 (13.0)	173173 (12.9)		48449 (13.0)	48768 (13.0)		27959 (12.3)	38726 (17.1)		26874 (12.4)	37005 (17.0)		63555 (12.8)	83179 (16.7)		125207 (16.0)	98673 (12.6)		242333 (14.2)	215231 (12.6)		18652 (15.5)	18948 (15.8)		22474 (17.4)	20261 (15.7)		49444 (12.3)	49465 (12.3)		68424 (15.4)	54733 (12.3)		15989 (13.1)	16041 (13.1)		21913 (16.4)	17607 (13.2)
	unknown	32439 (2.8)	32612 (2.8)		36828 (2.7)	36587 (2.7)		35528 (2.7)	35646 (2.7)		36597 (2.7)	36839 (2.7)		7488 (2.0)	9816 (2.6)		4566 (2.0)	4030 (1.8)		4335 (2.0)	3884 (1.8)		9746 (2.0)	9774 (2.0)		17574 (2.2)	16946 (2.2)		44185 (2.6)	38295 (2.2)		2477 (2.1)	2112 (1.8)		2353 (1.8)	2271 (1.8)		11307 (2.8)	10553 (2.6)		9999 (2.3)	11775 (2.7)		3214 (2.6)	2888 (2.4)		2800 (2.1)	3259 (2.4)
	W_Midlands	183151 (15.8)	182946 (15.8)		217237 (16.2)	216779 (16.1)		210811 (16.2)	210364 (16.2)		216521 (16.2)	216030 (16.1)		60401 (16.1)	60983 (16.3)		37124 (16.4)	35890 (15.8)		35762 (16.5)	34408 (15.8)		80900 (16.3)	100194 (20.1)		146339 (18.7)	140964 (18.0)		292733 (17.1)	310040 (18.1)		21525 (17.9)	21538 (17.9)		20837 (16.2)	23177 (18.0)		64220 (16.0)	64096 (15.9)		75610 (17.0)	70667 (15.9)		22284 (18.2)	22374 (18.3)		16038 (12.0)	24221 (18.2)
	Yorkshire	41107 (3.6)	41144 (3.6)		47974 (3.6)	47965 (3.6)		46178 (3.6)	46263 (3.6)		47776 (3.6)	47786 (3.6)		15121 (4.0)	14940 (4.0)		9191 (4.1)	8736 (3.9)		8737 (4.0)	8474 (3.9)		20206 (4.1)	14691 (3.0)		25508 (3.3)	30940 (4.0)		59718 (3.5)	66805 (3.9)		4587 (3.8)	4565 (3.8)		5890 (4.6)	4815 (3.7)		16001 (4.0)	16150 (4.0)		10299 (2.3)	17609 (4.0)		4549 (3.7)	4593 (3.8)		8750 (6.6)	4942 (3.7)
AF	0	1131046 (97.8)	1137020 (98.3)	<0.001	1303534 (97.0)	1312287 (97.7)	<0.001	1261009 (96.9)	1269826 (97.6)	<0.001	1299113 (97.0)	1307977 (97.6)	<0.001	344519 (92.1)	354516 (94.8)	<0.001	209271 (92.3)	213184 (94.0)	<0.001	200028 (92.1)	204013 (94.0)	<0.001	452253 (90.9)	465845 (93.6)	<0.001	740504 (94.7)	727568 (93.1)	<0.001	1628174 (95.3)	1600943 (93.7)	<0.001	109174 (90.8)	106532 (88.6)	<0.001	117294 (91.0)	114795 (89.1)	<0.001	390196 (97.1)	388104 (96.6)	<0.001	431648 (97.2)	430074 (96.9)	<0.001	116473 (95.4)	114902 (94.1)	<0.001	127249 (95.4)	126005 (94.5)	<0.001
	1	852696 (73.7)	753351 (65.1)		992784 (73.9)	885065 (65.9)		960044 (73.8)	853990 (65.7)		990061 (73.9)	882999 (65.9)		274912 (73.5)	259388 (69.3)		180269 (79.5)	172637 (76.1)		172482 (79.4)	164999 (76.0)		369170 (74.2)	357697 (71.9)		525561 (67.2)	600666 (76.8)		1141320 (66.8)	1319923 (77.2)		82837 (68.9)	91428 (76.1)		88439 (68.6)	98292 (76.3)		269596 (67.1)	303961 (75.6)		300184 (67.6)	336381 (75.8)		83213 (68.1)	89068 (72.9)		92776 (69.6)	97649 (73.2)
allergic_rhinitis	0	850483 (73.5)	1049900 (90.8)	<0.001	989945 (73.7)	1216446 (90.5)	<0.001	959636 (73.8)	1178504 (90.6)	<0.001	986830 (73.7)	1212850 (90.5)	<0.001	333221 (89.1)	339363 (90.7)	<0.001	198445 (87.5)	197356 (87.0)	<0.001	190259 (87.6)	189285 (87.2)	<0.001	437147 (87.8)	442576 (88.9)	<0.001	720044 (92.1)	692740 (88.6)	<0.001	1550067 (90.7)	1475557 (86.3)	<0.001	109714 (91.3)	107373 (89.3)	<0.001	114864 (89.1)	112611 (87.4)	<0.001	364337 (90.6)	356908 (88.8)	<0.001	389703 (87.8)	383712 (86.4)	<0.001	111000 (90.9)	109707 (89.8)	<0.001	116608 (87.4)	116707 (87.5)	0.566
	1	852696 (73.7)	753351 (65.1)		992784 (73.9)	885065 (65.9)		960044 (73.8)	853990 (65.7)		990061 (73.9)	882999 (65.9)		274912 (73.5)	259388 (69.3)		180269 (79.5)	172637 (76.1)		172482 (79.4)	164999 (76.0)		369170 (74.2)	357697 (71.9)		525561 (67.2)	600666 (76.8)		1141320 (66.8)	1319923 (77.2)		82837 (68.9)	91428 (76.1)		88439 (68.6)	98292 (76.3)		269596 (67.1)	303961 (75.6)		300184 (67.6)	336381 (75.8)		83213 (68.1)	89068 (72.9)		92776 (69.6)	97649 (73.2)
atopic_dermatitis	0	1067240 (92.3)	1112795 (96.2)	<0.001	1238898 (92.2)	1289812 (96.0)	<0.001	1201408 (92.4)	1250346 (96.1)	<0.001	1235213 (92.2)	1285679 (96.0)	<0.001	354502 (94.8)	359253 (96.0)	<0.001	213316 (94.1)	215477 (95.0)	<0.001	204801 (94.3)	206468 (95.1)	<0.001	468995 (94.2)	474320 (95.3)	<0.001	751419 (96.1)	739836 (94.7)	<0.001	1638625 (95.9)	1611210 (94.3)	<0.001	114746 (95.5)	113107 (94.1)	<0.001	122573 (95.1)	120885 (93.8)	<0.001	386431 (96.1)	370346 (92.1)	<0.001	424922 (95.7)	406796 (91.6)	<0.001	116814 (95.6)	115976 (94.9)	<0.001	126624 (95.0)	126016 (94.5)	<0.001
	1	852696 (73.7)	753351 (65.1)		992784 (73.9)	885065 (65.9)		960044 (73.8)	853990 (65.7)		990061 (73.9)	882999 (65.9)		274912 (73.5)	259388 (69.3)		180269 (79.5)	172637 (76.1)		172482 (79.4)	164999 (76.0)		369170 (74.2)	357697 (71.9)		525561 (67.2)	600666 (76.8)		1141320 (66.8)	1319923 (77.2)		82837 (68.9)	91428 (76.1)		88439 (68.6)	98292 (76.3)		269596 (67.1)	303961 (75.6)		300184 (67.6)	336381 (75.8)		83213 (68.1)	89068 (72.9)		92776 (69.6)	97649 (73.2)
coronary_heart	0	1096910 (94.8)	1112879 (96.2)	<0.001	1252396 (93.2)	1277012 (95.0)	<0.001	1211459 (93.1)	1235454 (95.0)	<0.001	1248087 (93.2)	1272698 (95.0)	<0.001	307672 (82.2)	333456 (89.1)	<0.001	188907 (83.3)	203570 (89.8)	<0.001	180662 (83.2)	194605 (89.6)	<0.001	398912 (80.2)	438446 (88.1)	<0.001	705711 (90.3)	677426 (86.7)	<0.001	1553927 (90.9)	1494424 (87.4)	<0.001	102520 (85.3)	98215 (81.7)	<0.001	110845 (86.0)	105904 (82.2)	<0.001	376687 (93.7)	370417 (92.2)	<0.001	419787 (94.5)	411871 (92.8)	<0.001	111124 (91.0)	107864 (88.3)	<0.001	122661 (92.0)	118599 (88.9)	<0.001
	1	852696 (73.7)	753351 (65.1)		992784 (73.9)	885065 (65.9)		960044 (73.8)	853990 (65.7)		990061 (73.9)	882999 (65.9)		274912 (73.5)	259388 (69.3)		180269 (79.5)	172637 (76.1)		172482 (79.4)	164999 (76.0)		369170 (74.2)	357697 (71.9)		525561 (67.2)	600666 (76.8)		1141320 (66.8)	1319923 (77.2)		82837 (68.9)	91428 (76.1)		88439 (68.6)	98292 (76.3)		269596 (67.1)	303961 (75.6)		300184 (67.6)	336381 (75.8)		83213 (68.1)	89068 (72.9)		92776 (69.6)	97649 (73.2)
diabetes_type_2	0	1080718 (93.4)	1098503 (95.0)	<0.001	1237556 (92.1)	1262278 (93.9)	<0.001	1198430 (92.1)	1222152 (94.0)	<0.001	1233818 (92.1)	1258599 (93.9)	<0.001	327391 (87.5)	331619 (88.6)	<0.001	196468 (86.6)	199982 (88.2)	<0.001	188180 (86.7)	191575 (88.2)	<0.001	428551 (86.1)	438841 (88.2)	<0.001	705856 (90.3)	681160 (87.1)	<0.001	1544503 (90.4)	1490367 (87.2)	<0.001	105419 (87.7)	103338 (86.0)	<0.001	112639 (87.4)	110695 (85.9)	<0.001	373771 (93.0)	366738 (91.2)	<0.001	414136 (93.3)	405578 (91.3)	<0.001	110378 (90.4)	108911 (89.2)	<0.001	121614 (91.2)	118647 (89.0)	<0.001
	1	852696 (73.7)	753351 (65.1)		992784 (73.9)	885065 (65.9)		960044 (73.8)	853990 (65.7)		990061 (73.9)	882999 (65.9)		274912 (73.5)	259388 (69.3)		180269 (79.5)	172637 (76.1)		172482 (79.4)	164999 (76.0)		369170 (74.2)	357697 (71.9)		525561 (67.2)	600666 (76.8)		1141320 (66.8)	1319923 (77.2)		82837 (68.9)	91428 (76.1)		88439 (68.6)	98292 (76.3)		269596 (67.1)	303961 (75.6)		300184 (67.6)	336381 (75.8)		83213 (68.1)	89068 (72.9)		92776 (69.6)	97649 (73.2)
HF	0	1141034 (98.6)	1147638 (99.2)	<0.001	1318326 (98.1)	1328982 (98.9)	<0.001	1275778 (98.1)	1286308 (98.9)	<0.001	1314208 (98.1)	1324679 (98.9)	<0.001	351023 (93.8)	365210 (97.6)	<0.001	214548 (94.6)	221230 (97.6)	<0.001	205317 (94.6)	211664 (97.5)	<0.001	462326 (92.9)	483694 (97.2)	<0.001	762779 (97.6)	754594 (96.5)	<0.001	1673409 (97.9)	1655976 (96.9)	<0.001	115356 (96.0)	113726 (94.6)	<0.001	123609 (95.9)	122434 (95.0)	<0.001	396315 (98.6)	394990 (98.3)	<0.001	438699 (98.8)	437300 (98.5)	<0.001	119423 (97.8)	117972 (96.6)	<0.001	130536 (97.9)	129282 (96.9)	<0.001
	1	852696 (73.7)	753351 (65.1)		992784 (73.9)	885065 (65.9)		960044 (73.8)	853990 (65.7)		990061 (73.9)	882999 (65.9)		274912 (73.5)	259388 (69.3)		180269 (79.5)	172637 (76.1)		172482 (79.4)	164999 (76.0)		369170 (74.2)	357697 (71.9)		525561 (67.2)	600666 (76.8)		1141320 (66.8)	1319923 (77.2)		82837 (68.9)	91428 (76.1)		88439 (68.6)	98292 (76.3)		269596 (67.1)	303961 (75.6)		300184 (67.6)	336381 (75.8)		83213 (68.1)	89068 (72.9)		92776 (69.6)	97649 (73.2)
hyperthyroid	0	1143468 (98.8)	1145868 (99.1)	<0.001	1326302 (98.7)	1329464 (98.9)	<0.001	1283821 (98.7)	1286860 (98.9)	<0.001	1322433 (98.7)	1325724 (99.0)	<0.001	367218 (98.2)	369706 (98.8)	<0.001	222436 (98.1)	223836 (98.7)	<0.001	212967 (98.1)	214273 (98.7)	<0.001	487648 (98.0)	491189 (98.7)	<0.001	770955 (98.6)	767836 (98.2)	<0.001	1686189 (98.7)	1679209 (98.3)	<0.001	118084 (98.3)	117490 (97.8)	<0.001	126654 (98.3)	126005 (97.8)	<0.001	397660 (98.9)	397060 (98.8)	<0.001	439476 (99.0)	438698 (98.8)	<0.001	120372 (98.5)	119624 (97.9)	<0.001	131287 (98.4)	130607 (97.9)	<0.001
	1	852696 (73.7)	753351 (65.1)		992784 (73.9)	885065 (65.9)		960044 (73.8)	853990 (65.7)		990061 (73.9)	882999 (65.9)		274912 (73.5)	259388 (69.3)		180269 (79.5)	172637 (76.1)		172482 (79.4)	164999 (76.0)		369170 (74.2)	357697 (71.9)		525561 (67.2)	600666 (76.8)		1141320 (66.8)	1319923 (77.2)		82837 (68.9)	91428 (76.1)		88439 (68.6)	98292 (76.3)		269596 (67.1)	303961 (75.6)		300184 (67.6)	336381 (75.8)		83213 (68.1)	89068 (72.9)		92776 (69.6)	97649 (73.2)
hypothyroid	0	1102796 (95.3)	1115651 (96.4)	<0.001	1271616 (94.6)	1287978 (95.9)	<0.001	1230518 (94.6)	1246536 (95.8)	<0.001	1267793 (94.6)	1283989 (95.8)	<0.001	351244 (93.9)	354340 (94.7)	<0.001	211833 (93.4)	213625 (94.2)	<0.001	202743 (93.4)	204398 (94.1)	<0.001	463311 (93.1)	468395 (94.1)	<0.001	734939 (94.0)	720146 (92.1)	<0.001	1606922 (94.0)	1574032 (92.1)	<0.001	110312 (91.8)	106281 (88.4)	<0.001	118172 (91.7)	113640 (88.2)	<0.001	385073 (95.8)	380681 (94.7)	<0.001	425719 (95.9)	420405 (94.7)	<0.001	114274 (93.6)	110944 (90.8)	<0.001	124345 (93.2)	120758 (90.6)	<0.001
	1	852696 (73.7)	753351 (65.1)		992784 (73.9)	885065 (65.9)		960044 (73.8)	853990 (65.7)		990061 (73.9)	882999 (65.9)		274912 (73.5)	259388 (69.3)		180269 (79.5)	172637 (76.1)		172482 (79.4)	164999 (76.0)		369170 (74.2)	357697 (71.9)		525561 (67.2)	600666 (76.8)		1141320 (66.8)	1319923 (77.2)		82837 (68.9)	91428 (76.1)		88439 (68.6)	98292 (76.3)		269596 (67.1)	303961 (75.6)		300184 (67.6)	336381 (75.8)		83213 (68.1)	89068 (72.9)		92776 (69.6)	97649 (73.2)
hypertension	0	925946 (80.0)	966187 (83.5)	<0.001	1022797 (76.1)	1074173 (79.9)	<0.001	988237 (76.0)	1039031 (79.9)	<0.001	1018600 (76.0)	1070031 (79.9)	<0.001	225640 (60.3)	237954 (63.6)	<0.001	133348 (58.8)	142206 (62.7)	<0.001	127400 (58.7)	135848 (62.6)	<0.001	282253 (56.7)	301060 (60.5)	<0.001	510195 (65.3)	435342 (55.7)	<0.001	1132638 (66.3)	968890 (56.7)	<0.001	62263 (51.8)	54884 (45.7)	<0.001	66535 (51.6)	58967 (45.8)	<0.001	308249 (76.7)	293125 (72.9)	<0.001	345321 (77.8)	327336 (73.7)	<0.001	80607 (66.0)	75620 (61.9)	<0.001	90123 (67.6)	83010 (62.2)	<0.001
	1	852696 (73.7)	753351 (65.1)		992784 (73.9)	885065 (65.9)		960044 (73.8)	853990 (65.7)		990061 (73.9)	882999 (65.9)		274912 (73.5)	259388 (69.3)		180269 (79.5)	172637 (76.1)		172482 (79.4)	164999 (76.0)		369170 (74.2)	357697 (71.9)		525561 (67.2)	600666 (76.8)		1141320 (66.8)	1319923 (77.2)		82837 (68.9)	91428 (76.1)		88439 (68.6)	98292 (76.3)		269596 (67.1)	303961 (75.6)		300184 (67.6)	336381 (75.8)		83213 (68.1)	89068 (72.9)		92776 (69.6)	97649 (73.2)
obesity	0	1050930 (90.8)	1095598 (94.7)	<0.001	1202989 (89.5)	1261908 (93.9)	<0.001	1166166 (89.7)	1222559 (94.0)	<0.001	1199816 (89.6)	1257966 (93.9)	<0.001	341994 (91.4)	349416 (93.4)	<0.001	202298 (89.2)	208167 (91.8)	<0.001	193943 (89.3)	199635 (92.0)	<0.001	446089 (89.6)	461801 (92.8)	<0.001	740641 (94.8)	690538 (88.3)	<0.001	1610332 (94.2)	1494557 (87.5)	<0.001	112080 (93.3)	109615 (91.2)	<0.001	119202 (92.5)	116628 (90.5)	<0.001	377215 (93.8)	367453 (91.4)	<0.001	416714 (93.9)	403104 (90.8)	<0.001	113157 (92.6)	111054 (90.9)	<0.001	122530 (91.9)	120004 (90.0)	<0.001
	1	852696 (73.7)	753351 (65.1)		992784 (73.9)	885065 (65.9)		960044 (73.8)	853990 (65.7)		990061 (73.9)	882999 (65.9)		274912 (73.5)	259388 (69.3)		180269 (79.5)	172637 (76.1)		172482 (79.4)	164999 (76.0)		369170 (74.2)	357697 (71.9)		525561 (67.2)	600666 (76.8)		1141320 (66.8)	1319923 (77.2)		82837 (68.9)	91428 (76.1)		88439 (68.6)	98292 (76.3)		269596 (67.1)	303961 (75.6)		300184 (67.6)	336381 (75.8)		83213 (68.1)	89068 (72.9)		92776 (69.6)	97649 (73.2)
asthma	0	NA	NA	NA	NA	NA	NA	NA	NA	NA	NA	NA	NA	265390 (70.9)	342955 (91.7)	<0.001	172577 (76.1)	203755 (89.9)	<0.001	165300 (76.1)	195044 (89.8)	<0.001	348219 (70.0)	451520 (90.7)	<0.001	NA	NA	NA	1560548 (91.3)	1490804 (87.2)	<0.001	NA	NA	NA	116558 (90.4)	112868 (87.6)	<0.001	NA	NA	NA	395921 (89.2)	388518 (87.5)	<0.001	NA	NA	NA	118685 (89.0)	114960 (86.2)	<0.001
	1	NA	NA	NA	NA	NA	NA	NA	NA	NA	NA	NA	NA	274912 (73.5)	259388 (69.3)		180269 (79.5)	172637 (76.1)		172482 (79.4)	164999 (76.0)		369170 (74.2)	357697 (71.9)		NA	NA	NA	1141320 (66.8)	1319923 (77.2)		NA	NA	NA	88439 (68.6)	98292 (76.3)		NA	NA	NA	300184 (67.6)	336381 (75.8)		NA	NA	NA	92776 (69.6)	97649 (73.2)

## Sheet: S4
	COPD (psoriasis)	COPD (psoriasis) Controls	COPD (RA)	COPD (RA) Controls	COPD (PMR)	COPD (PMR) Controls	COPD (osteoporosis)	COPD (osteoporosis) Controls	COPD (OA)	COPD (OA) Controls	Asthma (psoriasis)	Asthma (psoriasis) Controls	Asthma (RA)	Asthma (RA) Controls	Asthma (PMR)	Asthma (PMR) Controls	Asthma (osteoporosis)	Asthma (osteoporosis) Controls	Asthma (OA)	Asthma (OA) Controls	OA (COPD)	OA (COPD) Controls	OA (Asthma)	OA (Asthma) Controls	Osteoporosis (COPD)	Osteoporosis (COPD) Controls	Osteoporosis (Asthma)	Osteoporosis (Asthma) Controls	PMR (COPD)	PMR (COPD) Controls	PMR (Asthma)	PMR (Asthma) Controls	Psoriasis (COPD)	Psoriasis (COPD) Controls	Psoriasis (Asthma)	Psoriasis (Asthma) Controls	RA (COPD)	RA (COPD) Controls	RA (Asthma)	RA (Asthma) Controls
Number	183420	183420	187901	187901	188537	188537	174481	174481	141681	141681	144394	144394	146712	146712	147349	147349	130152	130152	109223	109223	589244	589244	593770	593770	248877	248877	243960	243960	26007	26007	26269	26269	80395	8035	81723	81723	26410	26410	26374	26374
age Mean (SD)	70.8 (11.6)	69.4 (12.0)	70.8 (11.6)	69.4 (12.0)	70.7 (11.5)	69.3 (11.9)	70.3 (11.6)	68.9 (12.0)	66.9 (12.3)	69.1 (11.6)	63.8 (13.5)	62.9 (13.5)	63.7 (13.4)	62.8 (13.5)	63.6 (13.4)	62.7 (13.4)	62.3 (13.3)	61.4 (13.2)	60.6 (12.8)	59.7 (12.8)	68.7 (12.1)	69.8 (11.7)	69.1 (12.1)	70.2 (11.7)	71.0 (11.1)	71.9 (10.8)	71.1 (11.1)	72.0 (10.8)	75.0 (10.2)	77.1 (9.76)	75.2 (10.1)	77.2 (9.68)	60.3 (11.8)	61.4 (11.8)	60.8 (12.0)	61.9 (11.9)	65.3 (12.6)	66.1 (12.5)	65.6 (12.6)	66.4 (12.5)
gender Female	51871 (28.3%)	51871 (28.3%)	52325 (27.8%)	52325 (27.8%)	52781 (28.0%)	52781 (28.0%)	41792 (24.0%)	41792 (24.0%)	45745 (23.9%)	34168 (24.1%)	98980 (68.5%)	98980 (68.5%)	99978 (68.1%)	99978 (68.1%)	100543 (68.2%)	100543 (68.2%)	83936 (64.5%)	83936 (64.5%)	68817 (63.0%)	68817 (63.0%)	399601 (67.8%)	399601 (67.8%)	385111 (64.9%)	385111 (64.9%)	232056 (93.2%)	232056 (93.2%)	223257 (91.5%)	223257 (91.5%)	18110 (69.6%)	18110 (69.6%)	17181 (65.4%)	17181 (65.4%)	37665 (46.8%)	37665 (46.8%)	36103 (44.2%)	36103 (44.2%)	19201 (72.7%)	19201 (72.7%)	18479 (70.1%)	18479 (70.1%)
imd quintile
1 (least deprived)	21793 (11.9%)	27634 (15.1%)	22317 (11.9%)	28337 (15.1%)	22399 (11.9%)	28604 (15.2%)	20167 (11.6%)	26129 (15.0%)	28553 (14.9%)	17255 (12.2%)	19527 (13.5%)	21941 (15.2%)	19831 (13.5%)	22377 (15.3%)	19935 (13.5%)	22523 (15.3%)	17385 (13.4%)	19599 (15.1%)	15607 (14.3%)	17110 (15.7%)	97108 (16.5%)	78837 (13.4%)	96707 (16.3%)	78978 (13.3%)	36963 (14.9%)	43818 (17.6%)	36478 (15.0%)	42987 (17.6%)	3965 (15.2%)	3689 (14.2%)	3794 (14.4%)	3734 (14.2%)	12081 (15.0%)	11787 (14.7%)	12237 (15.0%)	11845 (14.5%)	4030 (15.3%)	3907 (14.8%)	3994 (15.1%)	3873 (14.7%)
2	23085 (12.6%)	25730 (14.0%)	23681 (12.6%)	26654 (14.2%)	23780 (12.6%)	26663 (14.1%)	21974 (12.6%)	24749 (14.2%)	26574 (13.9%)	18109 (12.8%)	20817 (14.4%)	21195 (14.7%)	21161 (14.4%)	21564 (14.7%)	21266 (14.4%)	21613 (14.7%)	18798 (14.4%)	19123 (14.7%)	16126 (14.8%)	16465 (15.1%)	85289 (14.5%)	82706 (14.0%)	85151 (14.3%)	82512 (13.9%)	35276 (14.2%)	38054 (15.3%)	34312 (14.1%)	37034 (15.2%)	3624 (13.9%)	3615 (13.9%)	3720 (14.2%)	3624 (13.8%)	11842 (14.7%)	11898 (14.8%)	12019 (14.7%)	11989 (14.7%)	3880 (14.7%)	3815 (14.4%)	3878 (14.7%)	3763 (14.3%)
3	25227 (13.8%)	25866 (14.1%)	25813 (13.7%)	26309 (14.0%)	25921 (13.7%)	26557 (14.1%)	24168 (13.9%)	24639 (14.1%)	26688 (13.9%)	19578 (13.8%)	20867 (14.5%)	20821 (14.4%)	21263 (14.5%)	20885 (14.2%)	21345 (14.5%)	21105 (14.3%)	18899 (14.5%)	18649 (14.3%)	15838 (14.5%)	15702 (14.4%)	83124 (14.1%)	86358 (14.7%)	83367 (14.0%)	86560 (14.6%)	35627 (14.3%)	35600 (14.3%)	34989 (14.3%)	34761 (14.2%)	3702 (14.2%)	3683 (14.2%)	3710 (14.1%)	3733 (14.2%)	11801 (14.7%)	11953 (14.9%)	11847 (14.5%)	12038 (14.7%)	3888 (14.7%)	3750 (14.2%)	3770 (14.3%)	3743 (14.2%)
4	25734 (14.0%)	24724 (13.5%)	26438 (14.1%)	25400 (13.5%)	26535 (14.1%)	25342 (13.4%)	24764 (14.2%)	23636 (13.5%)	25467 (13.3%)	20030 (14.1%)	21231 (14.7%)	20081 (13.9%)	21560 (14.7%)	20545 (14.0%)	21695 (14.7%)	20582 (14.0%)	19127 (14.7%)	18387 (14.1%)	15819 (14.5%)	15029 (13.8%)	77315 (13.1%)	86515 (14.7%)	77848 (13.1%)	86763 (14.6%)	34053 (13.7%)	33890 (13.6%)	33415 (13.7%)	32894 (13.5%)	3348 (12.9%)	3391 (13.0%)	3507 (13.4%)	3357 (12.8%)	11336 (14.1%)	11766 (14.6%)	11459 (14.0%)	11939 (14.6%)	3722 (14.1%)	3669 (13.9%)	3707 (14.1%)	3630 (13.8%)
5 (most deprived)	26644 (14.5%)	21328 (11.6%)	27448 (14.6%)	22054 (11.7%)	27540 (14.6%)	22082 (11.7%)	25769 (14.8%)	20264 (11.6%)	22114 (11.6%)	20848 (14.7%)	20430 (14.1%)	18391 (12.7%)	20802 (14.2%)	18567 (12.7%)	20877 (14.2%)	18545 (12.6%)	18548 (14.3%)	16822 (12.9%)	15120 (13.8%)	13554 (12.4%)	66091 (11.2%)	78913 (13.4%)	66718 (11.2%)	79153 (13.3%)	30492 (12.3%)	27575 (11.1%)	29538 (12.1%)	26903 (11.0%)	2994 (11.5%)	2764 (10.6%)	2935 (11.2%)	2752 (10.5%)	10422 (13.0%)	10876 (13.5%)	10521 (12.9%)	11141 (13.6%)	3345 (12.7%)	3083 (11.7%)	3280 (12.4%)	3076 (11.7%)
Unknown	60937 (33.2%)	58138 (31.7%)	62204 (33.1%)	59147 (31.5%)	62362 (33.1%)	59289 (31.4%)	57639 (33.0%)	55064 (31.6%)	61969 (32.4%)	45861 (32.4%)	41522 (28.8%)	41965 (29.1%)	42095 (28.7%)	42774 (29.2%)	42231 (28.7%)	42981 (29.2%)	37395 (28.7%)	37572 (28.9%)	30713 (28.1%)	31363 (28.7%)	180317 (30.6%)	175915 (29.9%)	183979 (31.0%)	179804 (30.3%)	76466 (30.7%)	69940 (28.1%)	75228 (30.8%)	69381 (28.4%)	8374 (32.2%)	8865 (34.1%)	8603 (32.7%)	9069 (34.5%)	22913 (28.5%)	22115 (27.5%)	23640 (28.9%)	22771 (27.9%)	7545 (28.6%)	8186 (31.0%)	7745 (29.4%)	8289 (31.4%)
LDL category
Low	13507 (7.36%)	7918 (4.32%)	13924 (7.41%)	8073 (4.30%)	13930 (7.39%)	8188 (4.34%)	13136 (7.53%)	7752 (4.44%)	3 (0.00%)	10136 (7.15%)	4618 (3.20%)	3844 (2.66%)	4722 (3.22%)	3831 (2.61%)	4730 (3.21%)	3808 (2.58%)	4117 (3.16%)	3296 (2.53%)	3075 (2.82%)	2497 (2.29%)	18723 (3.18%)	23850 (4.05%)	20159 (3.40%)	25684 (4.33%)	7452 (2.99%)	7955 (3.20%)	7428 (3.04%)	8136 (3.33%)	1060 (4.08%)	1683 (6.47%)	1149 (4.37%)	1786 (6.80%)	1988 (2.47%)	2950 (3.67%)	2287 (2.80%)	3260 (3.99%)	731 (2.77%)	902 (3.42%)	756 (2.87%)	966 (3.66%)
Moderate	39338 (21.4%)	29420 (16.0%)	40370 (21.5%)	30095 (16.0%)	40438 (21.4%)	30683 (16.3%)	37636 (21.6%)	28055 (16.1%)	11 (0.01%)	28891 (20.4%)	20132 (13.9%)	16875 (11.7%)	20451 (13.9%)	17383 (11.8%)	20486 (13.9%)	17236 (11.7%)	17676 (13.6%)	14950 (11.5%)	13529 (12.4%)	11225 (10.3%)	77972 (13.2%)	98415 (16.7%)	81407 (13.7%)	102212 (17.2%)	34323 (13.8%)	36925 (14.8%)	34245 (14.0%)	36854 (15.1%)	4186 (16.1%)	5758 (22.1%)	4498 (17.1%)	5994 (22.8%)	9018 (11.2%)	11240 (14.0%)	9610 (11.8%)	11923 (14.6%)	3384 (12.8%)	3847 (14.6%)	3428 (13.0%)	3978 (15.1%)
Borderline High	76867 (41.9%)	69371 (37.8%)	78850 (42.0%)	71379 (38.0%)	79061 (41.9%)	71335 (37.8%)	72555 (41.6%)	65165 (37.3%)	32 (0.02%)	58103 (41.0%)	59322 (41.1%)	50690 (35.1%)	60362 (41.1%)	51604 (35.2%)	60562 (41.1%)	51777 (35.1%)	52239 (40.1%)	44014 (33.8%)	42320 (38.7%)	35045 (32.1%)	215566 (36.6%)	269803 (45.8%)	217369 (36.6%)	270545 (45.6%)	100754 (40.5%)	113657 (45.7%)	98353 (40.3%)	110827 (45.4%)	10988 (42.3%)	12060 (46.4%)	11011 (41.9%)	12056 (45.9%)	26922 (33.5%)	31975 (39.8%)	27478 (33.6%)	32513 (39.8%)	9863 (37.3%)	10531 (39.9%)	9845 (37.3%)	10440 (39.6%)
High	24464 (13.3%)	24717 (13.5%)	25088 (13.4%)	25467 (13.6%)	25182 (13.4%)	25396 (13.5%)	23074 (13.2%)	23329 (13.4%)	21 (0.01%)	19297 (13.6%)	24213 (16.8%)	21655 (15.0%)	24633 (16.8%)	21954 (15.0%)	24748 (16.8%)	21937 (14.9%)	21641 (16.6%)	19016 (14.6%)	17899 (16.4%)	15428 (14.1%)	90323 (15.3%)	103590 (17.6%)	89158 (15.0%)	101779 (17.1%)	42984 (17.3%)	45425 (18.3%)	41824 (17.1%)	43891 (18.0%)	3956 (15.2%)	3838 (14.8%)	3726 (14.2%)	3726 (14.2%)	11654 (14.5%)	13492 (16.8%)	11534 (14.1%)	13422 (16.4%)	4266 (16.2%)	3860 (14.6%)	4249 (16.1%)	3759 (14.3%)
Unknown	29244 (15.9%)	51994 (28.3%)	29669 (15.8%)	52887 (28.1%)	29926 (15.9%)	52935 (28.1%)	28080 (16.1%)	50180 (28.8%)	191298 (100.0%)	25254 (17.8%)	36109 (25.0%)	51330 (35.5%)	36544 (24.9%)	51940 (35.4%)	36823 (25.0%)	52591 (35.7%)	34479 (26.5%)	48876 (37.6%)	32400 (29.7%)	45028 (41.2%)	186660 (31.7%)	93586 (15.9%)	185677 (31.3%)	93550 (15.8%)	63364 (25.5%)	44915 (18.0%)	62110 (25.5%)	44252 (18.1%)	5817 (22.4%)	2668 (10.3%)	5885 (22.4%)	2707 (10.3%)	30813 (38.3%)	20738 (25.8%)	30814 (37.7%)	20605 (25.2%)	8166 (30.9%)	7270 (27.5%)	8096 (30.7%)	7231 (27.4%)
HDL category
Normal	119688 (65.3%)	105046 (57.3%)	122711 (65.3%)	107575 (57.3%)	122980 (65.2%)	108057 (57.3%)	113464 (65.0%)	99185 (56.8%)	51 (0.03%)	91189 (64.4%)	84676 (58.6%)	71699 (49.7%)	85977 (58.6%)	73297 (50.0%)	86317 (58.6%)	73293 (49.7%)	74330 (57.1%)	62691 (48.2%)	60971 (55.8%)	50262 (46.0%)	314083 (53.3%)	383126 (65.0%)	318425 (53.6%)	386442 (65.1%)	138100 (55.5%)	166521 (66.9%)	135666 (55.6%)	162876 (66.8%)	15516 (59.7%)	17426 (67.0%)	15761 (60.0%)	17651 (67.2%)	39168 (48.7%)	45735 (56.9%)	40099 (49.1%)	46829 (57.3%)	14185 (53.7%)	14970 (56.7%)	14229 (54.0%)	14957 (56.7%)
Low	38101 (20.8%)	29901 (16.3%)	39178 (20.9%)	30963 (16.5%)	39335 (20.9%)	31163 (16.5%)	36417 (20.9%)	28434 (16.3%)	22 (0.01%)	28281 (20.0%)	26535 (18.4%)	24298 (16.8%)	27114 (18.5%)	24469 (16.7%)	27193 (18.5%)	24482 (16.6%)	24044 (18.5%)	21253 (16.3%)	18275 (16.7%)	16193 (14.8%)	100547 (17.1%)	123770 (21.0%)	101676 (17.1%)	125070 (21.1%)	52240 (21.0%)	42712 (17.2%)	50952 (20.9%)	41985 (17.2%)	5112 (19.7%)	6300 (24.2%)	5081 (19.3%)	6298 (24.0%)	12065 (15.0%)	15933 (19.8%)	12468 (15.3%)	16313 (20.0%)	4601 (17.4%)	5149 (19.5%)	4585 (17.4%)	5156 (19.5%)
Unknown	25631 (14.0%)	48473 (26.4%)	26012 (13.8%)	49363 (26.3%)	26222 (13.9%)	49317 (26.2%)	24600 (14.1%)	46862 (26.9%)	191292 (100.0%)	22211 (15.7%)	33183 (23.0%)	48397 (33.5%)	33621 (22.9%)	48946 (33.4%)	33839 (23.0%)	49574 (33.6%)	31778 (24.4%)	46208 (35.5%)	29977 (27.4%)	42768 (39.2%)	174614 (29.6%)	82348 (14.0%)	173669 (29.2%)	82258 (13.9%)	58537 (23.5%)	39644 (15.9%)	57342 (23.5%)	39099 (16.0%)	5379 (20.7%)	2281 (8.77%)	5427 (20.7%)	2320 (8.83%)	29162 (36.3%)	18727 (23.3%)	29156 (35.7%)	18581 (22.7%)	7624 (28.9%)	6291 (23.8%)	7560 (28.7%)	6261 (23.7%)
sbp category
Normal	39505 (21.5%)	30616 (16.7%)	40383 (21.5%)	31416 (16.7%)	40512 (21.5%)	31718 (16.8%)	37010 (21.2%)	28462 (16.3%)	45 (0.02%)	30554 (21.6%)	31921 (22.1%)	27749 (19.2%)	32434 (22.1%)	28204 (19.2%)	32613 (22.1%)	28231 (19.2%)	28782 (22.1%)	24647 (18.9%)	24880 (22.8%)	21143 (19.4%)	104999 (17.8%)	120232 (20.4%)	106008 (17.9%)	121246 (20.4%)	44304 (17.8%)	58522 (23.5%)	43750 (17.9%)	57682 (23.6%)	4482 (17.2%)	4802 (18.5%)	4598 (17.5%)	4884 (18.6%)	14570 (18.1%)	16739 (20.8%)	14779 (18.1%)	16918 (20.7%)	5019 (19.0%)	5743 (21.7%)	5054 (19.2%)	5730 (21.7%)
Low	831 (0.45%)	402 (0.22%)	838 (0.45%)	416 (0.22%)	841 (0.45%)	417 (0.22%)	780 (0.45%)	346 (0.20%)	0 (0.00%)	629 (0.44%)	424 (0.29%)	404 (0.28%)	431 (0.29%)	422 (0.29%)	430 (0.29%)	440 (0.30%)	376 (0.29%)	401 (0.31%)	339 (0.31%)	322 (0.29%)	1516 (0.26%)	1461 (0.25%)	1667 (0.28%)	1548 (0.26%)	577 (0.23%)	937 (0.38%)	598 (0.25%)	945 (0.39%)	50 (0.19%)	76 (0.29%)	59 (0.22%)	81 (0.31%)	187 (0.23%)	203 (0.25%)	194 (0.24%)	213 (0.26%)	74 (0.28%)	80 (0.30%)	78 (0.30%)	83 (0.31%)
Elevated	98724 (53.8%)	86826 (47.3%)	101292 (53.9%)	89038 (47.4%)	101636 (53.9%)	89066 (47.2%)	93958 (53.8%)	82042 (47.0%)	53 (0.03%)	75042 (53.0%)	70409 (48.8%)	59157 (41.0%)	71604 (48.8%)	60277 (41.1%)	71920 (48.8%)	60015 (40.7%)	62463 (48.0%)	51643 (39.7%)	50259 (46.0%)	40495 (37.1%)	259950 (44.1%)	320543 (54.4%)	262888 (44.3%)	323188 (54.4%)	118909 (47.8%)	128331 (51.6%)	116476 (47.7%)	125545 (51.5%)	13141 (50.5%)	15114 (58.1%)	13193 (50.2%)	15260 (58.1%)	31992 (39.8%)	39034 (48.6%)	32922 (40.3%)	39951 (48.9%)	11629 (44.0%)	12722 (48.2%)	11526 (43.7%)	12729 (48.3%)
High	30599 (16.7%)	26964 (14.7%)	31436 (16.7%)	27744 (14.8%)	31506 (16.7%)	27880 (14.8%)	29425 (16.9%)	25648 (14.7%)	25 (0.01%)	23240 (16.4%)	19438 (13.5%)	16739 (11.6%)	19746 (13.5%)	17061 (11.6%)	19781 (13.4%)	17169 (11.7%)	17069 (13.1%)	14631 (11.2%)	13249 (12.1%)	10877 (9.96%)	79524 (13.5%)	91132 (15.5%)	81262 (13.7%)	92298 (15.5%)	38263 (15.4%)	33638 (13.5%)	37156 (15.2%)	32884 (13.5%)	4306 (16.6%)	4713 (18.1%)	4366 (16.6%)	4736 (18.0%)	8820 (11.0%)	10427 (13.0%)	9017 (11.0%)	10836 (13.3%)	3307 (12.5%)	3664 (13.9%)	3456 (13.1%)	3655 (13.9%)
Unknown	13761 (7.50%)	38612 (21.1%)	13952 (7.43%)	39287 (20.9%)	14042 (7.45%)	39456 (20.9%)	13308 (7.63%)	37983 (21.8%)	191242 (99.9%)	12216 (8.62%)	22202 (15.4%)	40345 (27.9%)	22497 (15.3%)	40748 (27.8%)	22605 (15.3%)	41494 (28.2%)	21462 (16.5%)	38830 (29.8%)	20496 (18.8%)	36386 (33.3%)	143255 (24.3%)	55876 (9.48%)	141945 (23.9%)	55490 (9.35%)	46824 (18.8%)	27449 (11.0%)	45980 (18.8%)	26904 (11.0%)	4028 (15.5%)	1302 (5.01%)	4053 (15.4%)	1308 (4.98%)	24826 (30.9%)	13992 (17.4%)	24811 (30.4%)	13805 (16.9%)	6381 (24.2%)	4201 (15.9%)	6260 (23.7%)	4177 (15.8%)
dbp category
Normal	110832 (60.4%)	97039 (52.9%)	113623 (60.5%)	99696 (53.1%)	113920 (60.4%)	99563 (52.8%)	104773 (60.0%)	91104 (52.2%)	68 (0.04%)	83701 (59.1%)	78422 (54.3%)	68615 (47.5%)	79613 (54.3%)	69871 (47.6%)	79926 (54.2%)	69680 (47.3%)	68891 (52.9%)	59381 (45.6%)	55839 (51.1%)	47212 (43.2%)	300015 (50.9%)	354605 (60.2%)	304127 (51.2%)	358505 (60.4%)	137231 (55.1%)	153772 (61.8%)	134696 (55.2%)	150640 (61.7%)	15267 (58.7%)	17147 (65.9%)	15389 (58.6%)	17312 (65.9%)	35552 (44.2%)	41571 (51.7%)	36707 (44.9%)	42705 (52.3%)	13233 (50.1%)	14662 (55.5%)	13274 (50.3%)	14685 (55.7%)
Low	16862 (9.19%)	11376 (6.20%)	17221 (9.16%)	11666 (6.21%)	17208 (9.13%)	11747 (6.23%)	15747 (9.03%)	10537 (6.04%)	9 (0.00%)	12050 (8.51%)	8336 (5.77%)	7608 (5.27%)	8464 (5.77%)	7611 (5.19%)	8438 (5.73%)	7539 (5.12%)	7041 (5.41%)	6416 (4.93%)	5621 (5.15%)	5013 (4.59%)	35888 (6.09%)	38821 (6.59%)	37504 (6.32%)	40914 (6.89%)	15889 (6.38%)	19626 (7.89%)	15780 (6.47%)	19591 (8.03%)	1977 (7.60%)	2873 (11.0%)	2134 (8.12%)	2977 (11.3%)	3352 (4.17%)	3814 (4.74%)	3552 (4.35%)	4073 (4.98%)	1461 (5.53%)	1706 (6.46%)	1516 (5.75%)	1768 (6.70%)
Elevated	34746 (18.9%)	30434 (16.6%)	35696 (19.0%)	31178 (16.6%)	35902 (19.0%)	31488 (16.7%)	33585 (19.2%)	28973 (16.6%)	29 (0.02%)	27751 (19.6%)	29221 (20.2%)	23011 (15.9%)	29803 (20.3%)	23552 (16.1%)	29984 (20.3%)	23615 (16.0%)	26878 (20.7%)	20976 (16.1%)	22272 (20.4%)	16874 (15.4%)	92370 (15.7%)	118479 (20.1%)	92658 (15.6%)	117678 (19.8%)	41541 (16.7%)	41695 (16.8%)	40344 (16.5%)	40645 (16.7%)	4076 (15.7%)	4069 (15.6%)	4013 (15.3%)	4061 (15.5%)	13634 (17.0%)	17106 (21.3%)	13695 (16.8%)	17207 (21.1%)	4446 (16.8%)	4881 (18.5%)	4445 (16.9%)	4804 (18.2%)
High	7219 (3.94%)	5959 (3.25%)	7409 (3.94%)	6074 (3.23%)	7465 (3.96%)	6283 (3.33%)	7068 (4.05%)	5884 (3.37%)	17 (0.01%)	5963 (4.21%)	6213 (4.30%)	4815 (3.33%)	6335 (4.32%)	4930 (3.36%)	6396 (4.34%)	5021 (3.41%)	5880 (4.52%)	4549 (3.50%)	4995 (4.57%)	3738 (3.42%)	17716 (3.01%)	21463 (3.64%)	17536 (2.95%)	21183 (3.57%)	7392 (2.97%)	6335 (2.55%)	7160 (2.93%)	6180 (2.53%)	659 (2.53%)	616 (2.37%)	680 (2.59%)	611 (2.33%)	3031 (3.77%)	3912 (4.87%)	2958 (3.62%)	3933 (4.81%)	889 (3.37%)	960 (3.63%)	879 (3.33%)	940 (3.56%)
Unknown	13761 (7.50%)	38612 (21.1%)	13952 (7.43%)	39287 (20.9%)	14042 (7.45%)	39456 (20.9%)	13308 (7.63%)	37983 (21.8%)	191242 (99.9%)	12216 (8.62%)	22202 (15.4%)	40345 (27.9%)	22497 (15.3%)	40748 (27.8%)	22605 (15.3%)	41494 (28.2%)	21462 (16.5%)	38830 (29.8%)	20496 (18.8%)	36386 (33.3%)	143255 (24.3%)	55876 (9.48%)	141945 (23.9%)	55490 (9.35%)	46824 (18.8%)	27449 (11.0%)	45980 (18.8%)	26904 (11.0%)	4028 (15.5%)	1302 (5.01%)	4053 (15.4%)	1308 (4.98%)	24826 (30.9%)	13992 (17.4%)	24811 (30.4%)	13805 (16.9%)	6381 (24.2%)	4201 (15.9%)	6260 (23.7%)	4177 (15.8%)
bmi category
Normal weight	32744 (17.9%)	19510 (10.6%)	33340 (17.7%)	19822 (10.5%)	33510 (17.8%)	20239 (10.7%)	30328 (17.4%)	18106 (10.4%)	25 (0.01%)	27544 (19.4%)	17915 (12.4%)	16166 (11.2%)	18117 (12.3%)	16405 (11.2%)	18215 (12.4%)	16472 (11.2%)	15616 (12.0%)	13767 (10.6%)	14854 (13.6%)	12313 (11.3%)	74391 (12.6%)	68136 (11.6%)	75712 (12.8%)	69747 (11.7%)	25971 (10.4%)	48618 (19.5%)	26041 (10.7%)	48651 (19.9%)	3073 (11.8%)	4097 (15.8%)	3117 (11.9%)	4253 (16.2%)	8112 (10.1%)	9716 (12.1%)	8298 (10.2%)	9992 (12.2%)	2934 (11.1%)	3907 (14.8%)	3028 (11.5%)	4006 (15.2%)
Underweight	1872 (1.02%)	320 (0.17%)	1884 (1.00%)	358 (0.19%)	1907 (1.01%)	382 (0.20%)	1634 (0.94%)	282 (0.16%)	0 (0.00%)	1687 (1.19%)	406 (0.28%)	435 (0.30%)	414 (0.28%)	462 (0.31%)	418 (0.28%)	468 (0.32%)	329 (0.25%)	342 (0.26%)	356 (0.33%)	335 (0.31%)	2020 (0.34%)	1354 (0.23%)	2261 (0.38%)	1487 (0.25%)	609 (0.24%)	1860 (0.75%)	617 (0.25%)	2015 (0.83%)	60 (0.23%)	112 (0.43%)	81 (0.31%)	123 (0.47%)	174 (0.22%)	205 (0.25%)	203 (0.25%)	229 (0.28%)	79 (0.30%)	117 (0.44%)	75 (0.28%)	136 (0.52%)
Overweight	57966 (31.6%)	48884 (26.7%)	59450 (31.6%)	49854 (26.5%)	59577 (31.6%)	49521 (26.3%)	55559 (31.8%)	46082 (26.4%)	28 (0.01%)	44966 (31.7%)	36410 (25.2%)	29051 (20.1%)	37039 (25.2%)	29633 (20.2%)	37189 (25.2%)	29603 (20.1%)	32116 (24.7%)	25491 (19.6%)	26971 (24.7%)	20263 (18.6%)	133198 (22.6%)	165402 (28.1%)	136284 (23.0%)	168235 (28.3%)	55534 (22.3%)	66689 (26.8%)	54957 (22.5%)	65317 (26.8%)	6880 (26.5%)	9144 (35.2%)	6959 (26.5%)	9339 (35.6%)	16399 (20.4%)	20612 (25.6%)	17041 (20.9%)	21320 (26.1%)	5603 (21.2%)	6713 (25.4%)	5746 (21.8%)	6783 (25.7%)
Obese	50901 (27.8%)	32518 (17.7%)	52640 (28.0%)	33922 (18.1%)	52784 (28.0%)	33849 (18.0%)	49263 (28.2%)	31201 (17.9%)	11 (0.01%)	35136 (24.8%)	39624 (27.4%)	24511 (17.0%)	40405 (27.5%)	25181 (17.2%)	40523 (27.5%)	25111 (17.0%)	35533 (27.3%)	22043 (16.9%)	24702 (22.6%)	14898 (13.6%)	90997 (15.4%)	172017 (29.2%)	91874 (15.5%)	172319 (29.0%)	58922 (23.7%)	44761 (18.0%)	56747 (23.3%)	42859 (17.6%)	5586 (21.5%)	6887 (26.5%)	5588 (21.3%)	6817 (26.0%)	12622 (15.7%)	18802 (23.4%)	12987 (15.9%)	19414 (23.8%)	5044 (19.1%)	5218 (19.8%)	4920 (18.7%)	5142 (19.5%)
Unknown	39937 (21.8%)	82188 (44.8%)	40587 (21.6%)	83945 (44.7%)	40759 (21.6%)	84546 (44.8%)	37697 (21.6%)	78810 (45.2%)	191301 (100.0%)	32348 (22.8%)	50039 (34.7%)	74231 (51.4%)	50737 (34.6%)	75031 (51.1%)	51004 (34.6%)	75695 (51.4%)	46558 (35.8%)	68509 (52.6%)	42340 (38.8%)	61414 (56.2%)	288638 (49.0%)	182335 (30.9%)	287639 (48.4%)	181982 (30.6%)	107841 (43.3%)	86949 (34.9%)	105598 (43.3%)	85118 (34.9%)	10408 (40.0%)	5767 (22.2%)	10524 (40.1%)	5737 (21.8%)	43088 (53.6%)	31060 (38.6%)	43194 (52.9%)	30768 (37.6%)	12750 (48.3%)	10455 (39.6%)	12605 (47.8%)	10307 (39.1%)
totalcholesterol category
Desirable	98068 (53.5%)	78878 (43.0%)	100705 (53.6%)	80995 (43.1%)	100937 (53.5%)	81785 (43.4%)	94243 (54.0%)	75805 (43.4%)	55 (0.03%)	73657 (52.0%)	55522 (38.5%)	48149 (33.3%)	56538 (38.5%)	48968 (33.4%)	56724 (38.5%)	49084 (33.3%)	49955 (38.4%)	43076 (33.1%)	39829 (36.5%)	33784 (30.9%)	208770 (35.4%)	254662 (43.2%)	216228 (36.4%)	262753 (44.3%)	87532 (35.2%)	91923 (36.9%)	86945 (35.6%)	91476 (37.5%)	10735 (41.3%)	13618 (52.4%)	11338 (43.2%)	14088 (53.6%)	26538 (33.0%)	32090 (39.9%)	28009 (34.3%)	33513 (41.0%)	9262 (35.1%)	10697 (40.5%)	9300 (35.3%)	10913 (41.4%)
Borderline High	48508 (26.4%)	46924 (25.6%)	49662 (26.4%)	48151 (25.6%)	49876 (26.5%)	48310 (25.6%)	45434 (26.0%)	43376 (24.9%)	32 (0.02%)	37293 (26.3%)	44532 (30.8%)	38910 (26.9%)	45177 (30.8%)	39784 (27.1%)	45422 (30.8%)	39876 (27.1%)	39227 (30.1%)	33900 (26.0%)	32453 (29.7%)	27614 (25.3%)	161105 (27.3%)	192145 (32.6%)	160438 (27.0%)	190640 (32.1%)	76505 (30.7%)	86885 (34.9%)	74466 (30.5%)	84315 (34.6%)	7719 (29.7%)	7668 (29.5%)	7677 (29.2%)	7559 (28.8%)	20579 (25.6%)	23488 (29.2%)	20647 (25.3%)	23631 (28.9%)	7446 (28.2%)	8077 (30.6%)	7424 (28.1%)	7942 (30.1%)
High	20443 (11.1%)	19731 (10.8%)	20897 (11.1%)	20276 (10.8%)	20980 (11.1%)	20064 (10.6%)	18997 (10.9%)	18309 (10.5%)	16 (0.01%)	16193 (11.4%)	21538 (14.9%)	19562 (13.5%)	21899 (14.9%)	19776 (13.5%)	21987 (14.9%)	19726 (13.4%)	18956 (14.6%)	16814 (12.9%)	15949 (14.6%)	13821 (12.7%)	81230 (13.8%)	90384 (15.3%)	79769 (13.4%)	88442 (14.9%)	39931 (16.0%)	44170 (17.7%)	38578 (15.8%)	42604 (17.5%)	3534 (13.6%)	3503 (13.5%)	3237 (12.3%)	3383 (12.9%)	10007 (12.4%)	11740 (14.6%)	9842 (12.0%)	11626 (14.2%)	3846 (14.6%)	3772 (14.3%)	3822 (14.5%)	3677 (13.9%)
Unknown	16401 (8.94%)	37887 (20.7%)	16637 (8.85%)	38479 (20.5%)	16744 (8.88%)	38378 (20.4%)	15807 (9.06%)	36991 (21.2%)	191262 (99.9%)	14538 (10.3%)	22802 (15.8%)	37773 (26.2%)	23098 (15.7%)	38184 (26.0%)	23216 (15.8%)	38663 (26.2%)	22014 (16.9%)	36362 (27.9%)	20992 (19.2%)	34004 (31.1%)	138139 (23.4%)	52053 (8.83%)	137335 (23.1%)	51935 (8.75%)	44909 (18.0%)	25899 (10.4%)	43971 (18.0%)	25565 (10.5%)	4019 (15.5%)	1218 (4.68%)	4017 (15.3%)	1239 (4.72%)	23271 (28.9%)	13077 (16.3%)	23225 (28.4%)	12953 (15.8%)	5856 (22.2%)	3864 (14.6%)	5828 (22.1%)	3842 (14.6%)
smoking status
non_smoker	48010 (26.2%)	92022 (50.2%)	48539 (25.8%)	93397 (49.7%)	48614 (25.8%)	94005 (49.9%)	41919 (24.0%)	84018 (48.2%)	74064 (38.7%)	31242 (22.1%)	85296 (59.1%)	75983 (52.6%)	86244 (58.8%)	77244 (52.7%)	86552 (58.7%)	77176 (52.4%)	73878 (56.8%)	64876 (49.8%)	59736 (54.7%)	51056 (46.7%)	335120 (56.9%)	374538 (63.6%)	326639 (55.0%)	364227 (61.3%)	169565 (68.1%)	177128 (71.2%)	163394 (67.0%)	169478 (69.5%)	16982 (65.3%)	17880 (68.8%)	16397 (62.4%)	17237 (65.6%)	36915 (45.9%)	35402 (44.0%)	36362 (44.5%)	34240 (41.9%)	14947 (56.6%)	15093 (57.1%)	14628 (55.5%)	14576 (55.3%)
active_smoker	59588 (32.5%)	24750 (13.5%)	61250 (32.6%)	25430 (13.5%)	61651 (32.7%)	25726 (13.6%)	58682 (33.6%)	25009 (14.3%)	29660 (15.5%)	51882 (36.6%)	19360 (13.4%)	23649 (16.4%)	19857 (13.5%)	24133 (16.4%)	20002 (13.6%)	24405 (16.6%)	19081 (14.7%)	23112 (17.8%)	17508 (16.0%)	21065 (19.3%)	70718 (12.0%)	64086 (10.9%)	75499 (12.7%)	68981 (11.6%)	18925 (7.60%)	20049 (8.06%)	19728 (8.09%)	21502 (8.81%)	1840 (7.08%)	1472 (5.66%)	2099 (7.99%)	1700 (6.47%)	15717 (19.5%)	18758 (23.3%)	16478 (20.2%)	19700 (24.1%)	3726 (14.1%)	3900 (14.8%)	3774 (14.3%)	4084 (15.5%)
ex_smoker	70951 (38.7%)	43105 (23.5%)	73222 (39.0%)	45066 (24.0%)	73334 (38.9%)	44740 (23.7%)	69256 (39.7%)	42395 (24.3%)	35394 (18.5%)	54356 (38.4%)	29627 (20.5%)	21152 (14.6%)	30441 (20.7%)	21516 (14.7%)	30557 (20.7%)	21553 (14.6%)	27532 (21.2%)	19448 (14.9%)	22761 (20.8%)	15762 (14.4%)	92617 (15.7%)	119146 (20.2%)	102088 (17.2%)	129304 (21.8%)	29903 (12.0%)	35250 (14.2%)	30971 (12.7%)	36876 (15.1%)	4529 (17.4%)	5732 (22.0%)	5109 (19.4%)	6418 (24.4%)	13480 (16.8%)	19325 (24.0%)	14639 (17.9%)	20963 (25.7%)	3977 (15.1%)	4902 (18.6%)	4266 (16.2%)	5240 (19.9%)
unknown	4871 (2.66%)	23543 (12.8%)	4890 (2.60%)	24008 (12.8%)	4938 (2.62%)	24066 (12.8%)	4624 (2.65%)	23059 (13.2%)	52247 (27.3%)	4201 (2.97%)	10111 (7.00%)	23610 (16.4%)	10170 (6.93%)	23819 (16.2%)	10238 (6.95%)	24215 (16.4%)	9661 (7.42%)	22716 (17.5%)	9218 (8.44%)	21340 (19.5%)	90789 (15.4%)	31474 (5.34%)	89544 (15.1%)	31258 (5.26%)	30484 (12.2%)	16450 (6.61%)	29867 (12.2%)	16104 (6.60%)	2656 (10.2%)	923 (3.55%)	2664 (10.1%)	914 (3.48%)	14283 (17.8%)	6910 (8.60%)	14244 (17.4%)	6820 (8.35%)	3760 (14.2%)	2515 (9.52%)	3706 (14.1%)	2474 (9.38%)
triglyceride category
Normal	115678 (63.1%)	102197 (55.7%)	118470 (63.0%)	104746 (55.7%)	118757 (63.0%)	105073 (55.7%)	108849 (62.4%)	96076 (55.1%)	57 (0.03%)	86996 (61.4%)	83904 (58.1%)	72717 (50.4%)	85145 (58.0%)	74031 (50.5%)	85581 (58.1%)	74198 (50.4%)	73497 (56.5%)	63109 (48.5%)	60008 (54.9%)	50373 (46.1%)	320280 (54.4%)	381514 (64.7%)	323786 (54.5%)	384674 (64.8%)	145285 (58.4%)	169224 (68.0%)	142224 (58.3%)	165739 (67.9%)	16048 (61.7%)	18088 (69.6%)	16234 (61.8%)	18375 (69.9%)	37939 (47.2%)	44105 (54.9%)	38995 (47.7%)	45067 (55.1%)	14341 (54.3%)	15654 (59.3%)	14391 (54.6%)	15629 (59.3%)
Borderline High	21894 (11.9%)	17629 (9.61%)	22532 (12.0%)	18102 (9.63%)	22621 (12.0%)	18200 (9.65%)	21164 (12.1%)	16702 (9.57%)	7 (0.00%)	16556 (11.7%)	14589 (10.1%)	12076 (8.36%)	14924 (10.2%)	12350 (8.42%)	14935 (10.1%)	12358 (8.39%)	13156 (10.1%)	10744 (8.25%)	10089 (9.24%)	8198 (7.51%)	51555 (8.75%)	68421 (11.6%)	52622 (8.86%)	69136 (11.6%)	25362 (10.2%)	23484 (9.44%)	24975 (10.2%)	22993 (9.42%)	2614 (10.1%)	3292 (12.7%)	2677 (10.2%)	3275 (12.5%)	6609 (8.22%)	8816 (11.0%)	6702 (8.20%)	9040 (11.1%)	2362 (8.94%)	2727 (10.3%)	2405 (9.12%)	2729 (10.3%)
High	21271 (11.6%)	15526 (8.46%)	21939 (11.7%)	16185 (8.61%)	22021 (11.7%)	16262 (8.63%)	20850 (11.9%)	15132 (8.67%)	10 (0.01%)	16798 (11.9%)	12477 (8.64%)	10821 (7.49%)	12790 (8.72%)	10890 (7.42%)	12793 (8.68%)	10843 (7.36%)	11533 (8.86%)	9671 (7.43%)	8972 (8.21%)	7606 (6.96%)	42936 (7.29%)	56571 (9.60%)	43989 (7.41%)	57521 (9.69%)	19691 (7.91%)	16405 (6.59%)	19370 (7.94%)	16167 (6.63%)	2033 (7.82%)	2523 (9.70%)	2041 (7.77%)	2502 (9.52%)	6549 (8.15%)	9127 (11.4%)	6756 (8.27%)	9447 (11.6%)	1973 (7.47%)	2237 (8.47%)	2002 (7.59%)	2254 (8.55%)
Unknown	24577 (13.4%)	48068 (26.2%)	24960 (13.3%)	48868 (26.0%)	25138 (13.3%)	49002 (26.0%)	23618 (13.5%)	46571 (26.7%)	191291 (100.0%)	21331 (15.1%)	33424 (23.1%)	48780 (33.8%)	33853 (23.1%)	49441 (33.7%)	34040 (23.1%)	49950 (33.9%)	31966 (24.6%)	46628 (35.8%)	30154 (27.6%)	43046 (39.4%)	174473 (29.6%)	82738 (14.0%)	173373 (29.2%)	82439 (13.9%)	58539 (23.5%)	39764 (16.0%)	57391 (23.5%)	39061 (16.0%)	5312 (20.4%)	2104 (8.09%)	5317 (20.2%)	2117 (8.06%)	29298 (36.4%)	18347 (22.8%)	29270 (35.8%)	18169 (22.2%)	7734 (29.3%)	5792 (21.9%)	7576 (28.7%)	5762 (21.8%)
alcohol consumption level
Non-drinker	83478 (45.5%)	73850 (40.3%)	85147 (45.3%)	75447 (40.2%)	85437 (45.3%)	76030 (40.3%)	76684 (43.9%)	67415 (38.6%)	43 (0.02%)	60639 (42.8%)	75506 (52.3%)	62774 (43.5%)	76494 (52.1%)	64100 (43.7%)	76861 (52.2%)	63789 (43.3%)	65268 (50.1%)	53515 (41.1%)	52181 (47.8%)	41886 (38.3%)	268740 (45.6%)	323409 (54.9%)	268704 (45.3%)	322007 (54.2%)	137414 (55.2%)	151227 (60.8%)	133379 (54.7%)	147143 (60.3%)	14014 (53.9%)	15828 (60.9%)	13876 (52.8%)	15721 (59.8%)	29809 (37.1%)	34587 (43.0%)	30026 (36.7%)	34891 (42.7%)	12348 (46.8%)	14139 (53.5%)	12178 (46.2%)	13978 (53.0%)
Low-risk drinker	60816 (33.2%)	44602 (24.3%)	62778 (33.4%)	45965 (24.5%)	62954 (33.4%)	45958 (24.4%)	60127 (34.5%)	44218 (25.3%)	18 (0.01%)	48554 (34.3%)	29300 (20.3%)	22299 (15.4%)	30065 (20.5%)	22807 (15.5%)	30178 (20.5%)	22881 (15.5%)	27828 (21.4%)	21052 (16.2%)	23388 (21.4%)	17072 (15.6%)	95712 (16.2%)	135270 (23.0%)	100186 (16.9%)	140433 (23.7%)	30044 (12.1%)	38521 (15.5%)	30544 (12.5%)	38770 (15.9%)	4253 (16.4%)	6190 (23.8%)	4577 (17.4%)	6550 (24.9%)	15208 (18.9%)	21685 (27.0%)	16139 (19.7%)	22591 (27.6%)	4106 (15.5%)	4753 (18.0%)	4300 (16.3%)	4909 (18.6%)
High-risk drinker	7246 (3.95%)	2915 (1.59%)	7523 (4.00%)	3316 (1.76%)	7557 (4.01%)	3229 (1.71%)	7348 (4.21%)	3085 (1.77%)	2 (0.00%)	6280 (4.43%)	1740 (1.21%)	1627 (1.13%)	1806 (1.23%)	1634 (1.11%)	1808 (1.23%)	1726 (1.17%)	1728 (1.33%)	1547 (1.19%)	1481 (1.36%)	1333 (1.22%)	6050 (1.03%)	7080 (1.20%)	6691 (1.13%)	7853 (1.32%)	1316 (0.53%)	1260 (0.51%)	1435 (0.59%)	1387 (0.57%)	216 (0.83%)	198 (0.76%)	257 (0.98%)	224 (0.85%)	1250 (1.55%)	1883 (2.34%)	1382 (1.69%)	2072 (2.54%)	294 (1.11%)	250 (0.95%)	287 (1.09%)	267 (1.01%)
unknown	31880 (17.4%)	62053 (33.8%)	32453 (17.3%)	63173 (33.6%)	32589 (17.3%)	63320 (33.6%)	30322 (17.4%)	59763 (34.3%)	191302 (100.0%)	26208 (18.5%)	37848 (26.2%)	57694 (40.0%)	38347 (26.1%)	58171 (39.6%)	38502 (26.1%)	58953 (40.0%)	35328 (27.1%)	54038 (41.5%)	32173 (29.5%)	48932 (44.8%)	218742 (37.1%)	123485 (21.0%)	218189 (36.7%)	123477 (20.8%)	80103 (32.2%)	57869 (23.3%)	78602 (32.2%)	56660 (23.2%)	7524 (28.9%)	3791 (14.6%)	7559 (28.8%)	3774 (14.4%)	34128 (42.5%)	22240 (27.7%)	34176 (41.8%)	22169 (27.1%)	9662 (36.6%)	7268 (27.5%)	9609 (36.4%)	7220 (27.4%)
albumin category
Normal	37290 (20.3%)	21508 (11.7%)	38178 (20.3%)	22231 (11.8%)	38248 (20.3%)	22171 (11.8%)	34552 (19.8%)	19981 (11.5%)	6 (0.00%)	27357 (19.3%)	22034 (15.3%)	15322 (10.6%)	22309 (15.2%)	15567 (10.6%)	22408 (15.2%)	15560 (10.6%)	18598 (14.3%)	12833 (9.86%)	14826 (13.6%)	10165 (9.31%)	68068 (11.6%)	98784 (16.8%)	69747 (11.7%)	100861 (17.0%)	31440 (12.6%)	48638 (19.5%)	30834 (12.6%)	48151 (19.7%)	3648 (14.0%)	7842 (30.2%)	3740 (14.2%)	7989 (30.4%)	7644 (9.51%)	11454 (14.2%)	8138 (9.96%)	11969 (14.6%)	3067 (11.6%)	5739 (21.7%)	3066 (11.6%)	5759 (21.8%)
Low	4478 (2.44%)	2138 (1.17%)	4515 (2.40%)	2109 (1.12%)	4534 (2.40%)	2188 (1.16%)	4080 (2.34%)	1926 (1.10%)	2 (0.00%)	3139 (2.22%)	1733 (1.20%)	1257 (0.87%)	1741 (1.19%)	1256 (0.86%)	1738 (1.18%)	1222 (0.83%)	1431 (1.10%)	1067 (0.82%)	1026 (0.94%)	751 (0.69%)	7516 (1.28%)	7656 (1.30%)	8002 (1.35%)	8171 (1.38%)	3399 (1.37%)	3988 (1.60%)	3415 (1.40%)	4089 (1.68%)	385 (1.48%)	926 (3.56%)	416 (1.58%)	960 (3.65%)	498 (0.62%)	650 (0.81%)	572 (0.70%)	721 (0.88%)	253 (0.96%)	650 (2.46%)	271 (1.03%)	688 (2.61%)
High	207 (0.11%)	108 (0.06%)	212 (0.11%)	105 (0.06%)	212 (0.11%)	106 (0.06%)	203 (0.12%)	91 (0.05%)	0 (0.00%)	163 (0.12%)	122 (0.08%)	56 (0.04%)	124 (0.08%)	83 (0.06%)	126 (0.09%)	71 (0.05%)	111 (0.09%)	73 (0.06%)	106 (0.10%)	56 (0.05%)	254 (0.04%)	462 (0.08%)	240 (0.04%)	466 (0.08%)	90 (0.04%)	199 (0.08%)	86 (0.04%)	196 (0.08%)	6 (0.02%)	11 (0.04%)	6 (0.02%)	12 (0.05%)	45 (0.06%)	112 (0.14%)	46 (0.06%)	111 (0.14%)	7 (0.03%)	21 (0.08%)	13 (0.05%)	21 (0.08%)
Unknown	141445 (77.1%)	159666 (87.0%)	144996 (77.2%)	163456 (87.0%)	145543 (77.2%)	164072 (87.0%)	135646 (77.7%)	152483 (87.4%)	191357 (100.0%)	111022 (78.4%)	120505 (83.5%)	127759 (88.5%)	122538 (83.5%)	129806 (88.5%)	123077 (83.5%)	130496 (88.6%)	110012 (84.5%)	116179 (89.3%)	93265 (85.4%)	98251 (90.0%)	513406 (87.1%)	482342 (81.9%)	515781 (86.9%)	484272 (81.6%)	213948 (86.0%)	196052 (78.8%)	209625 (85.9%)	191524 (78.5%)	21968 (84.5%)	17228 (66.2%)	22107 (84.2%)	17308 (65.9%)	72208 (89.8%)	68179 (84.8%)	72967 (89.3%)	68922 (84.3%)	23083 (87.4%)	20000 (75.7%)	23024 (87.3%)	19906 (75.5%)
region
Urban	147671 (80.5%)	144474 (78.8%)	151443 (80.6%)	148354 (79.0%)	151970 (80.6%)	149024 (79.0%)	140194 (80.3%)	137362 (78.7%)	150055 (78.4%)	114248 (80.6%)	116858 (80.9%)	115722 (80.1%)	118785 (81.0%)	117430 (80.0%)	119322 (81.0%)	118044 (80.1%)	104740 (80.5%)	103916 (79.8%)	88184 (80.7%)	87290 (79.9%)	469357 (79.7%)	472921 (80.3%)	472537 (79.6%)	475989 (80.2%)	197920 (79.5%)	206955 (83.2%)	193914 (79.5%)	202688 (83.1%)	20774 (79.9%)	20078 (77.2%)	20927 (79.7%)	20275 (77.2%)	64167 (79.8%)	64933 (80.8%)	65225 (79.8%)	66018 (80.8%)	21416 (81.1%)	20878 (79.1%)	21113 (80.1%)	20824 (79.0%)
Rural	35480 (19.3%)	38603 (21.0%)	36178 (19.3%)	39222 (20.9%)	36284 (19.2%)	39164 (20.8%)	34020 (19.5%)	36821 (21.1%)	40896 (21.4%)	27209 (19.2%)	27230 (18.9%)	28473 (19.7%)	27619 (18.8%)	29050 (19.8%)	27716 (18.8%)	29053 (19.7%)	25134 (19.3%)	26032 (20.0%)	20797 (19.0%)	21749 (19.9%)	118556 (20.1%)	115522 (19.6%)	119945 (20.2%)	116979 (19.7%)	50398 (20.3%)	41610 (16.7%)	49534 (20.3%)	40978 (16.8%)	5177 (19.9%)	5906 (22.7%)	5279 (20.1%)	5972 (22.7%)	16095 (20.0%)	15325 (19.1%)	16370 (20.0%)	15560 (19.0%)	4949 (18.7%)	5493 (20.8%)	5217 (19.8%)	5513 (20.9%)
Unknown	269 (0.15%)	343 (0.19%)	280 (0.15%)	325 (0.17%)	283 (0.15%)	349 (0.19%)	267 (0.15%)	298 (0.17%)	414 (0.22%)	224 (0.16%)	306 (0.21%)	199 (0.14%)	308 (0.21%)	232 (0.16%)	311 (0.21%)	252 (0.17%)	278 (0.21%)	204 (0.16%)	242 (0.22%)	184 (0.17%)	1331 (0.23%)	801 (0.14%)	1288 (0.22%)	802 (0.14%)	559 (0.22%)	312 (0.13%)	512 (0.21%)	294 (0.12%)	56 (0.22%)	23 (0.09%)	63 (0.24%)	22 (0.08%)	133 (0.17%)	137 (0.17%)	128 (0.16%)	145 (0.18%)	45 (0.17%)	39 (0.15%)	44 (0.17%)	37 (0.14%)
LTC
AF	19835 (10.8%)	10973 (5.98%)	20249 (10.8%)	11209 (5.97%)	20200 (10.7%)	11127 (5.90%)	18416 (10.6%)	10185 (5.84%)	8305 (4.34%)	13355 (9.43%)	7689 (5.33%)	5203 (3.60%)	7800 (5.32%)	5322 (3.63%)	7754 (5.26%)	5193 (3.52%)	6274 (4.82%)	4240 (3.26%)	4212 (3.86%)	2922 (2.68%)	29717 (5.04%)	35899 (6.09%)	32085 (5.40%)	38745 (6.53%)	14038 (5.64%)	15295 (6.15%)	14044 (5.76%)	15628 (6.41%)	2016 (7.75%)	2616 (10.1%)	2132 (8.12%)	2765 (10.5%)	2177 (2.71%)	2749 (3.42%)	2562 (3.13%)	3123 (3.82%)	1098 (4.16%)	1342 (5.08%)	1090 (4.13%)	1414 (5.36%)
allergic rhinitis	10905 (5.95%)	7767 (4.23%)	11250 (5.99%)	7944 (4.23%)	11267 (5.98%)	7934 (4.21%)	10262 (5.88%)	7398 (4.24%)	5657 (2.96%)	7634 (5.39%)	26862 (18.6%)	6327 (4.38%)	27447 (18.7%)	6437 (4.39%)	27565 (18.7%)	6460 (4.38%)	24861 (19.1%)	5703 (4.38%)	21332 (19.5%)	4632 (4.24%)	23313 (3.96%)	41697 (7.08%)	20818 (3.51%)	37746 (6.36%)	10656 (4.28%)	16216 (6.52%)	9360 (3.84%)	14097 (5.78%)	1088 (4.18%)	1809 (6.96%)	911 (3.47%)	1659 (6.32%)	3914 (4.87%)	5597 (6.96%)	3631 (4.44%)	5058 (6.19%)	1288 (4.88%)	1695 (6.42%)	1163 (4.41%)	1509 (5.72%)
atopic dermatitis	3205 (1.75%)	2298 (1.25%)	3369 (1.79%)	2349 (1.25%)	3367 (1.79%)	2465 (1.31%)	3057 (1.75%)	2195 (1.26%)	1423 (0.74%)	2305 (1.63%)	3588 (2.48%)	1825 (1.26%)	3680 (2.51%)	1937 (1.32%)	3714 (2.52%)	1894 (1.29%)	3191 (2.45%)	1688 (1.30%)	2595 (2.38%)	1337 (1.22%)	6950 (1.18%)	11412 (1.94%)	6742 (1.14%)	11240 (1.89%)	3377 (1.36%)	4725 (1.90%)	3172 (1.30%)	4486 (1.84%)	349 (1.34%)	542 (2.08%)	330 (1.26%)	533 (2.03%)	960 (1.19%)	2592 (3.22%)	932 (1.14%)	2558 (3.13%)	352 (1.33%)	533 (2.02%)	359 (1.36%)	523 (1.98%)
coronary heart	23375 (12.7%)	15596 (8.50%)	23976 (12.8%)	16129 (8.58%)	24005 (12.7%)	16312 (8.65%)	22538 (12.9%)	15218 (8.72%)	14452 (7.55%)	17153 (12.1%)	7460 (5.17%)	6057 (4.19%)	7583 (5.17%)	6161 (4.20%)	7571 (5.14%)	6211 (4.22%)	6433 (4.94%)	5270 (4.05%)	4545 (4.16%)	3825 (3.50%)	33538 (5.69%)	38915 (6.60%)	36576 (6.16%)	42241 (7.11%)	12229 (4.91%)	12586 (5.06%)	12464 (5.11%)	12927 (5.30%)	1914 (7.36%)	2495 (9.59%)	2133 (8.12%)	2632 (10.0%)	3391 (4.22%)	4421 (5.50%)	3883 (4.75%)	4988 (6.10%)	1227 (4.65%)	1419 (5.37%)	1218 (4.62%)	1523 (5.77%)
diabetes type 2	44081 (24.0%)	36282 (19.8%)	45532 (24.2%)	37696 (20.1%)	45581 (24.2%)	37716 (20.0%)	43143 (24.7%)	35429 (20.3%)	32593 (17.0%)	32753 (23.1%)	21441 (14.8%)	19090 (13.2%)	21876 (14.9%)	19524 (13.3%)	21886 (14.9%)	19561 (13.3%)	19216 (14.8%)	16970 (13.0%)	13537 (12.4%)	12191 (11.2%)	98274 (16.7%)	113723 (19.3%)	102017 (17.2%)	117654 (19.8%)	47035 (18.9%)	32982 (13.3%)	46293 (19.0%)	32694 (13.4%)	5440 (20.9%)	6440 (24.8%)	5550 (21.1%)	6603 (25.1%)	10186 (12.7%)	13522 (16.8%)	10895 (13.3%)	14434 (17.7%)	3935 (14.9%)	3857 (14.6%)	3991 (15.1%)	3938 (14.9%)
HF	17593 (9.59%)	5405 (2.95%)	17954 (9.56%)	5599 (2.98%)	17877 (9.48%)	5577 (2.96%)	15983 (9.16%)	4952 (2.84%)	3671 (1.92%)	11440 (8.07%)	6269 (4.34%)	3193 (2.21%)	6347 (4.33%)	3294 (2.25%)	6291 (4.27%)	3158 (2.14%)	4966 (3.82%)	2565 (1.97%)	3157 (2.89%)	1624 (1.49%)	16661 (2.83%)	22383 (3.80%)	18896 (3.18%)	24981 (4.21%)	8828 (3.55%)	10132 (4.07%)	9000 (3.69%)	10661 (4.37%)	1150 (4.42%)	1834 (7.05%)	1255 (4.78%)	1981 (7.54%)	1133 (1.41%)	1588 (1.98%)	1408 (1.72%)	1938 (2.37%)	619 (2.34%)	862 (3.26%)	666 (2.53%)	946 (3.59%)
hypertension	104283 (56.9%)	91334 (49.8%)	107012 (57.0%)	93541 (49.8%)	107209 (56.9%)	93564 (49.6%)	98710 (56.6%)	86119 (49.4%)	81866 (42.8%)	75388 (53.2%)	64099 (44.4%)	54800 (38.0%)	65094 (44.4%)	55984 (38.2%)	65233 (44.3%)	55763 (37.8%)	55050 (42.3%)	46721 (35.9%)	40644 (37.2%)	34093 (31.2%)	269650 (45.8%)	326674 (55.4%)	275598 (46.4%)	332453 (56.0%)	134268 (53.9%)	126113 (50.7%)	131667 (54.0%)	123637 (50.7%)	15467 (59.5%)	17768 (68.3%)	15675 (59.7%)	17996 (68.5%)	27339 (34.0%)	32935 (41.0%)	28563 (35.0%)	34358 (42.0%)	11338 (42.9%)	12145 (46.0%)	11424 (43.3%)	12246 (46.4%)
hyperthyroid	2197 (1.20%)	1442 (0.79%)	2241 (1.19%)	1459 (0.78%)	2253 (1.19%)	1474 (0.78%)	1919 (1.10%)	1260 (0.72%)	1021 (0.53%)	1541 (1.09%)	2104 (1.46%)	1648 (1.14%)	2139 (1.46%)	1660 (1.13%)	2147 (1.46%)	1709 (1.16%)	1791 (1.38%)	1427 (1.10%)	1441 (1.32%)	1120 (1.03%)	6627 (1.12%)	8411 (1.43%)	6584 (1.11%)	8300 (1.40%)	3487 (1.40%)	4671 (1.88%)	3309 (1.36%)	4565 (1.87%)	326 (1.25%)	509 (1.96%)	302 (1.15%)	494 (1.88%)	711 (0.88%)	891 (1.11%)	697 (0.85%)	889 (1.09%)	313 (1.19%)	393 (1.49%)	306 (1.16%)	389 (1.47%)
hypothyroid	6116 (3.33%)	4767 (2.60%)	6217 (3.31%)	4858 (2.59%)	6262 (3.32%)	4795 (2.54%)	5338 (3.06%)	4108 (2.35%)	2691 (1.41%)	4109 (2.90%)	7862 (5.44%)	5904 (4.09%)	7962 (5.43%)	6059 (4.13%)	8021 (5.44%)	5919 (4.02%)	6686 (5.14%)	4956 (3.81%)	5226 (4.78%)	4036 (3.70%)	25231 (4.28%)	31789 (5.39%)	24577 (4.14%)	30960 (5.21%)	14125 (5.68%)	16557 (6.65%)	13548 (5.55%)	15940 (6.53%)	1133 (4.36%)	1825 (7.02%)	1132 (4.31%)	1774 (6.75%)	2492 (3.10%)	3379 (4.20%)	2512 (3.07%)	3268 (4.00%)	1173 (4.44%)	1541 (5.83%)	1125 (4.27%)	1492 (5.66%)
obesity	48261 (26.3%)	29672 (16.2%)	49858 (26.5%)	30844 (16.4%)	49989 (26.5%)	30954 (16.4%)	46484 (26.6%)	28448 (16.3%)	24869 (13.0%)	32675 (23.1%)	39653 (27.5%)	24551 (17.0%)	40424 (27.6%)	25368 (17.3%)	40545 (27.5%)	25008 (17.0%)	35610 (27.4%)	22048 (16.9%)	24746 (22.7%)	15061 (13.8%)	89386 (15.2%)	173994 (29.5%)	89873 (15.1%)	173808 (29.3%)	58884 (23.7%)	46071 (18.5%)	56575 (23.2%)	44110 (18.1%)	5301 (20.4%)	7658 (29.4%)	5269 (20.1%)	7530 (28.7%)	12537 (15.6%)	18776 (23.4%)	12734 (15.6%)	19215 (23.5%)	4948 (18.7%)	5442 (20.6%)	4816 (18.3%)	5371 (20.4%)

## Sheet: S5 
label	levels	asthma&OA_Neither	asthma&OA_Only asthma	asthma&OA_Only OA	asthma&OA_asthma before OA	asthma&OA_OA before asthma	asthma&OA_p	asthma&PMR_Neither	asthma&PMR_Only asthma	asthma&PMR_Only PMR	asthma&PMR_asthma before PMR	asthma&PMR_PMR before asthma	asthma&PMR_p	asthma&psoriasis_Neither	asthma&psoriasis_Only asthma	asthma&psoriasis_Only psoriasis	asthma&psoriasis_asthma before psoriasis	asthma&psoriasis_psoriasis before asthma	asthma&psoriasis_p	asthma&RA_Neither	asthma&RA_Only asthma	asthma&RA_Only RA	asthma&RA_asthma before RA	asthma&RA_RA before asthma	asthma&RA_p	COPD&OA_Neither	COPD&OA_Only COPD	COPD&OA_Only OA	COPD&OA_COPD before OA	COPD&OA_OA before COPD	COPD&OA_p	COPD&PMR_Neither	COPD&PMR_Only COPD	COPD&PMR_Only PMR	COPD&PMR_COPD before PMR	COPD&PMR_PMR before COPD	COPD&PMR_p	COPD&psoriasis_Neither	COPD&psoriasis_Only COPD	COPD&psoriasis_Only psoriasis	COPD&psoriasis_COPD before psoriasis	COPD&psoriasis_psoriasis before COPD	COPD&psoriasis_p	COPD&RA_Neither	COPD&RA_Only COPD	COPD&RA_Only RA	COPD&RA_COPD before RA	COPD&RA_RA before COPD	COPD&RA_p
Total N (%)		275834 (25.0)	275834 (25.0)	275834 (25.0)	205293 (18.6)	70541 (6.4)		21887 (25.0)	21887 (25.0)	21887 (25.0)	17822 (20.4)	4065 (4.6)		69969 (25.0)	69969 (25.0)	69969 (25.0)	43921 (15.7)	26048 (9.3)		24747 (25.0)	24747 (25.0)	24747 (25.0)	17301 (17.5)	7446 (7.5)		166846 (25.0)	166846 (25.0)	166846 (25.0)	63320 (9.5)	103526 (15.5)		14771 (25.0)	14771 (25.0)	14771 (25.0)	7546 (12.8)	7225 (12.2)		34276 (25.0)	34276 (25.0)	34276 (25.0)	9847 (7.2)	24429 (17.8)		16776 (25.0)	16776 (25.0)	16776 (25.0)	5849 (8.7)	10927 (16.3)
age	Mean (SD)	65.7 (12.7)	65.7 (12.7)	65.7 (12.7)	64.4 (12.7)	69.5 (12.1)	<0.001	74.7 (10.6)	74.7 (10.6)	74.7 (10.6)	74.2 (10.6)	76.8 (10.6)	<0.001	56.3 (13.8)	56.3 (13.8)	56.3 (13.8)	55.3 (13.6)	58.1 (13.9)	<0.001	63.7 (13.5)	63.7 (13.5)	63.7 (13.5)	62.5 (13.6)	66.4 (13.1)	<0.001	72.7 (10.3)	72.7 (10.3)	72.7 (10.3)	72.1 (10.4)	73.1 (10.1)	<0.001	77.3 (8.7)	77.3 (8.7)	77.3 (8.7)	76.6 (8.5)	78.1 (8.9)	<0.001	68.8 (11.1)	68.8 (11.1)	68.8 (11.1)	69.5 (10.6)	68.5 (11.3)	<0.001	70.9 (10.3)	70.9 (10.3)	70.9 (10.3)	70.7 (10.2)	70.9 (10.3)	0.802
gender	1	95309 (34.6)	95309 (34.6)	95309 (34.6)	71201 (34.7)	24108 (34.2)	0.202	5914 (27.0)	5914 (27.0)	5914 (27.0)	4964 (27.9)	950 (23.4)	<0.001	30628 (43.8)	30628 (43.8)	30628 (43.8)	19965 (45.5)	10663 (40.9)	<0.001	6237 (25.2)	6237 (25.2)	6237 (25.2)	4481 (25.9)	1756 (23.6)	0.005	76456 (45.8)	76456 (45.8)	76456 (45.8)	29109 (46.0)	47347 (45.7)	0.926	5673 (38.4)	5673 (38.4)	5673 (38.4)	3045 (40.4)	2628 (36.4)	<0.001	17345 (50.6)	17345 (50.6)	17345 (50.6)	5137 (52.2)	12208 (50.0)	0.009	6646 (39.6)	6646 (39.6)	6646 (39.6)	2423 (41.4)	4223 (38.6)	0.015
	2	180525 (65.4)	180525 (65.4)	180525 (65.4)	134092 (65.3)	46433 (65.8)		15973 (73.0)	15973 (73.0)	15973 (73.0)	12858 (72.1)	3115 (76.6)		39341 (56.2)	39341 (56.2)	39341 (56.2)	23956 (54.5)	15385 (59.1)		18510 (74.8)	18510 (74.8)	18510 (74.8)	12820 (74.1)	5690 (76.4)		90390 (54.2)	90390 (54.2)	90390 (54.2)	34211 (54.0)	56179 (54.3)		9098 (61.6)	9098 (61.6)	9098 (61.6)	4501 (59.6)	4597 (63.6)		16931 (49.4)	16931 (49.4)	16931 (49.4)	4710 (47.8)	12221 (50.0)		10130 (60.4)	10130 (60.4)	10130 (60.4)	3426 (58.6)	6704 (61.4)
imd_quintile	1	70921 (25.7)	61173 (22.2)	62425 (22.6)	39311 (19.1)	12314 (17.5)	<0.001	5785 (26.4)	5291 (24.2)	6220 (28.4)	4397 (24.7)	978 (24.1)	<0.001	19486 (27.8)	17666 (25.2)	16569 (23.7)	8769 (20.0)	5078 (19.5)	<0.001	6001 (24.2)	5825 (23.5)	5494 (22.2)	3018 (17.4)	1224 (16.4)	<0.001	44965 (27.0)	26827 (16.1)	42858 (25.7)	8700 (13.7)	14531 (14.0)	<0.001	4129 (28.0)	2917 (19.7)	4376 (29.6)	1410 (18.7)	1527 (21.1)	<0.001	9522 (27.8)	5799 (16.9)	8540 (24.9)	1280 (13.0)	3506 (14.4)	<0.001	4288 (25.6)	3014 (18.0)	4014 (23.9)	792 (13.5)	1523 (13.9)	<0.001
	2	180525 (65.4)	180525 (65.4)	180525 (65.4)	134092 (65.3)	46433 (65.8)		15973 (73.0)	15973 (73.0)	15973 (73.0)	12858 (72.1)	3115 (76.6)		39341 (56.2)	39341 (56.2)	39341 (56.2)	23956 (54.5)	15385 (59.1)		18510 (74.8)	18510 (74.8)	18510 (74.8)	12820 (74.1)	5690 (76.4)		90390 (54.2)	90390 (54.2)	90390 (54.2)	34211 (54.0)	56179 (54.3)		9098 (61.6)	9098 (61.6)	9098 (61.6)	4501 (59.6)	4597 (63.6)		16931 (49.4)	16931 (49.4)	16931 (49.4)	4710 (47.8)	12221 (50.0)		10130 (60.4)	10130 (60.4)	10130 (60.4)	3426 (58.6)	6704 (61.4)
	3	52780 (19.1)	53404 (19.4)	53237 (19.3)	38531 (18.8)	13090 (18.6)		3633 (16.6)	3889 (17.8)	4379 (20.0)	3585 (20.1)	832 (20.5)		11685 (16.7)	12544 (17.9)	13597 (19.4)	8298 (18.9)	4867 (18.7)		3965 (16.0)	4162 (16.8)	4832 (19.5)	3308 (19.1)	1418 (19.0)		31646 (19.0)	31635 (19.0)	31772 (19.0)	11369 (18.0)	18658 (18.0)		2478 (16.8)	2500 (16.9)	2952 (20.0)	1535 (20.3)	1463 (20.2)		5761 (16.8)	6189 (18.1)	6682 (19.5)	1775 (18.0)	4442 (18.2)		2835 (16.9)	2802 (16.7)	3285 (19.6)	1073 (18.3)	2063 (18.9)
	4	47021 (17.0)	50102 (18.2)	51240 (18.6)	39515 (19.2)	14107 (20.0)		4168 (19.0)	4089 (18.7)	3356 (15.3)	2907 (16.3)	653 (16.1)		11958 (17.1)	12314 (17.6)	12688 (18.1)	8202 (18.7)	4807 (18.5)		4970 (20.1)	4613 (18.6)	4620 (18.7)	3381 (19.5)	1539 (20.7)		27773 (16.6)	35184 (21.1)	28822 (17.3)	13624 (21.5)	22203 (21.4)		2552 (17.3)	3288 (22.3)	2137 (14.5)	1430 (19.0)	1298 (18.0)		5969 (17.4)	7558 (22.1)	5872 (17.1)	2179 (22.1)	5197 (21.3)		3107 (18.5)	3749 (22.3)	2965 (17.7)	1275 (21.8)	2334 (21.4)
	5	36554 (13.3)	45446 (16.5)	42286 (15.3)	42203 (20.6)	16010 (22.7)		3130 (14.3)	3652 (16.7)	2143 (9.8)	2449 (13.7)	620 (15.3)		10163 (14.5)	11131 (15.9)	10341 (14.8)	8660 (19.7)	5346 (20.5)		4162 (16.8)	4493 (18.2)	3948 (16.0)	3685 (21.3)	1681 (22.6)		20514 (12.3)	39235 (23.5)	21815 (13.1)	17735 (28.0)	28135 (27.2)		2173 (14.7)	3118 (21.1)	1361 (9.2)	1479 (19.6)	1247 (17.3)		4810 (14.0)	8100 (23.6)	4678 (13.6)	2805 (28.5)	6482 (26.5)		2677 (16.0)	4019 (24.0)	2475 (14.8)	1581 (27.0)	2914 (26.7)
	unknown	6256 (2.3)	6265 (2.3)	4540 (1.6)	4828 (2.4)	1523 (2.2)		400 (1.8)	347 (1.6)	306 (1.4)	294 (1.6)	75 (1.8)		1456 (2.1)	1450 (2.1)	1261 (1.8)	1194 (2.7)	678 (2.6)		558 (2.3)	485 (2.0)	412 (1.7)	463 (2.7)	189 (2.5)		3391 (2.0)	2299 (1.4)	2358 (1.4)	1161 (1.8)	1860 (1.8)		247 (1.7)	131 (0.9)	171 (1.2)	102 (1.4)	120 (1.7)		609 (1.8)	400 (1.2)	572 (1.7)	199 (2.0)	518 (2.1)		304 (1.8)	174 (1.0)	262 (1.6)	125 (2.1)	205 (1.9)
LDL_category	Moderate	27361 (9.9)	30571 (11.1)	33943 (12.3)	30178 (14.7)	11574 (16.4)	<0.001	2698 (12.3)	2899 (13.2)	3189 (14.6)	2977 (16.7)	667 (16.4)	<0.001	5406 (7.7)	5878 (8.4)	6314 (9.0)	4991 (11.4)	3142 (12.1)	<0.001	2369 (9.6)	2538 (10.3)	2851 (11.5)	2537 (14.7)	1108 (14.9)	<0.001	21308 (12.8)	26364 (15.8)	24370 (14.6)	11989 (18.9)	20035 (19.4)	<0.001	1991 (13.5)	2370 (16.0)	2283 (15.5)	1414 (18.7)	1404 (19.4)	<0.001	4089 (11.9)	4979 (14.5)	4555 (13.3)	1833 (18.6)	4419 (18.1)	<0.001	2019 (12.0)	2475 (14.8)	2285 (13.6)	1058 (18.1)	1914 (17.5)	<0.001
	Low	14113 (5.1)	16211 (5.9)	17442 (6.3)	15902 (7.7)	7059 (10.0)		1717 (7.8)	1751 (8.0)	1714 (7.8)	1741 (9.8)	409 (10.1)		2591 (3.7)	2884 (4.1)	3167 (4.5)	2378 (5.4)	1578 (6.1)		1167 (4.7)	1342 (5.4)	1500 (6.1)	1293 (7.5)	594 (8.0)		12911 (7.7)	17828 (10.7)	14630 (8.8)	8283 (13.1)	14391 (13.9)		1312 (8.9)	1657 (11.2)	1341 (9.1)	988 (13.1)	902 (12.5)		2448 (7.1)	3371 (9.8)	2859 (8.3)	1243 (12.6)	2964 (12.1)		1188 (7.1)	1691 (10.1)	1425 (8.5)	716 (12.2)	1241 (11.4)
	Borderline High	63947 (23.2)	67459 (24.5)	78674 (28.5)	65097 (31.7)	21763 (30.9)		5316 (24.3)	5241 (23.9)	6362 (29.1)	5691 (31.9)	1223 (30.1)		13641 (19.5)	14455 (20.7)	15963 (22.8)	11794 (26.9)	7037 (27.0)		5631 (22.8)	5882 (23.8)	6410 (25.9)	5257 (30.4)	2136 (28.7)		41917 (25.1)	42132 (25.3)	47097 (28.2)	18580 (29.3)	30198 (29.2)		3702 (25.1)	3465 (23.5)	4246 (28.7)	2254 (29.9)	2180 (30.2)		8671 (25.3)	8496 (24.8)	9350 (27.3)	2882 (29.3)	7211 (29.5)		4339 (25.9)	4233 (25.2)	4552 (27.1)	1752 (30.0)	3152 (28.8)
	High	21093 (7.6)	21033 (7.6)	25013 (9.1)	19266 (9.4)	6168 (8.7)		1850 (8.5)	1568 (7.2)	2187 (10.0)	1792 (10.1)	369 (9.1)		4371 (6.2)	4249 (6.1)	5104 (7.3)	3534 (8.0)	2029 (7.8)		2061 (8.3)	1832 (7.4)	1805 (7.3)	1397 (8.1)	535 (7.2)		13388 (8.0)	10765 (6.5)	13911 (8.3)	4525 (7.1)	7383 (7.1)		1281 (8.7)	845 (5.7)	1375 (9.3)	602 (8.0)	569 (7.9)		2849 (8.3)	2173 (6.3)	2889 (8.4)	699 (7.1)	1827 (7.5)		1528 (9.1)	1106 (6.6)	1234 (7.4)	373 (6.4)	683 (6.3)
	Unknown	149320 (54.1)	140560 (51.0)	120762 (43.8)	74850 (36.5)	23977 (34.0)		10306 (47.1)	10428 (47.6)	8435 (38.5)	5621 (31.5)	1397 (34.4)		43960 (62.8)	42503 (60.7)	39421 (56.3)	21224 (48.3)	12262 (47.1)		13519 (54.6)	13153 (53.1)	12181 (49.2)	6817 (39.4)	3073 (41.3)		77322 (46.3)	69757 (41.8)	66838 (40.1)	19943 (31.5)	31519 (30.4)		6485 (43.9)	6434 (43.6)	5526 (37.4)	2288 (30.3)	2170 (30.0)		16219 (47.3)	15257 (44.5)	14623 (42.7)	3190 (32.4)	8008 (32.8)		7702 (45.9)	7271 (43.3)	7280 (43.4)	1950 (33.3)	3937 (36.0)
HDL_category	Normal	130848 (47.4)	135886 (49.3)	156702 (56.8)	124978 (60.9)	43436 (61.6)	<0.001	12169 (55.6)	11947 (54.6)	13807 (63.1)	12121 (68.0)	2630 (64.7)	<0.001	27504 (39.3)	28569 (40.8)	30084 (43.0)	20893 (47.6)	12803 (49.2)	<0.001	11885 (48.0)	12044 (48.7)	12657 (51.1)	9903 (57.2)	4098 (55.0)	<0.001	92152 (55.2)	95863 (57.5)	102275 (61.3)	41262 (65.2)	66416 (64.2)	<0.001	8684 (58.8)	8649 (58.6)	9575 (64.8)	5115 (67.8)	4916 (68.0)	<0.001	18917 (55.2)	19374 (56.5)	19361 (56.5)	6218 (63.1)	15016 (61.5)	<0.001	9586 (57.1)	9735 (58.0)	9583 (57.1)	3639 (62.2)	6680 (61.1)	<0.001
	Low	14113 (5.1)	16211 (5.9)	17442 (6.3)	15902 (7.7)	7059 (10.0)		1717 (7.8)	1751 (8.0)	1714 (7.8)	1741 (9.8)	409 (10.1)		2591 (3.7)	2884 (4.1)	3167 (4.5)	2378 (5.4)	1578 (6.1)		1167 (4.7)	1342 (5.4)	1500 (6.1)	1293 (7.5)	594 (8.0)		12911 (7.7)	17828 (10.7)	14630 (8.8)	8283 (13.1)	14391 (13.9)		1312 (8.9)	1657 (11.2)	1341 (9.1)	988 (13.1)	902 (12.5)		2448 (7.1)	3371 (9.8)	2859 (8.3)	1243 (12.6)	2964 (12.1)		1188 (7.1)	1691 (10.1)	1425 (8.5)	716 (12.2)	1241 (11.4)
	Unknown	149320 (54.1)	140560 (51.0)	120762 (43.8)	74850 (36.5)	23977 (34.0)		10306 (47.1)	10428 (47.6)	8435 (38.5)	5621 (31.5)	1397 (34.4)		43960 (62.8)	42503 (60.7)	39421 (56.3)	21224 (48.3)	12262 (47.1)		13519 (54.6)	13153 (53.1)	12181 (49.2)	6817 (39.4)	3073 (41.3)		77322 (46.3)	69757 (41.8)	66838 (40.1)	19943 (31.5)	31519 (30.4)		6485 (43.9)	6434 (43.6)	5526 (37.4)	2288 (30.3)	2170 (30.0)		16219 (47.3)	15257 (44.5)	14623 (42.7)	3190 (32.4)	8008 (32.8)		7702 (45.9)	7271 (43.3)	7280 (43.4)	1950 (33.3)	3937 (36.0)
sbp_category	Normal	37333 (13.5)	38179 (13.8)	39883 (14.5)	30213 (14.7)	9149 (13.0)	<0.001	2417 (11.0)	2427 (11.1)	2413 (11.0)	2122 (11.9)	467 (11.5)	<0.001	12465 (17.8)	12791 (18.3)	13059 (18.7)	8403 (19.1)	4739 (18.2)	<0.001	3941 (15.9)	3801 (15.4)	4384 (17.7)	3051 (17.6)	1195 (16.0)	<0.001	17765 (10.6)	24833 (14.9)	18849 (11.3)	9490 (15.0)	15084 (14.6)	<0.001	1566 (10.6)	2071 (14.0)	1482 (10.0)	1061 (14.1)	1003 (13.9)	<0.001	4116 (12.0)	5459 (15.9)	4159 (12.1)	1541 (15.6)	3894 (15.9)	<0.001	1919 (11.4)	2556 (15.2)	2148 (12.8)	961 (16.4)	1828 (16.7)	<0.001
	Low	14113 (5.1)	16211 (5.9)	17442 (6.3)	15902 (7.7)	7059 (10.0)		1717 (7.8)	1751 (8.0)	1714 (7.8)	1741 (9.8)	409 (10.1)		2591 (3.7)	2884 (4.1)	3167 (4.5)	2378 (5.4)	1578 (6.1)		1167 (4.7)	1342 (5.4)	1500 (6.1)	1293 (7.5)	594 (8.0)		12911 (7.7)	17828 (10.7)	14630 (8.8)	8283 (13.1)	14391 (13.9)		1312 (8.9)	1657 (11.2)	1341 (9.1)	988 (13.1)	902 (12.5)		2448 (7.1)	3371 (9.8)	2859 (8.3)	1243 (12.6)	2964 (12.1)		1188 (7.1)	1691 (10.1)	1425 (8.5)	716 (12.2)	1241 (11.4)
	Elevated	106862 (38.7)	108420 (39.3)	125024 (45.3)	95765 (46.6)	31748 (45.0)		9150 (41.8)	8483 (38.8)	9699 (44.3)	7868 (44.1)	1725 (42.4)		26983 (38.6)	28431 (40.6)	29368 (42.0)	19897 (45.3)	11502 (44.2)		10026 (40.5)	9988 (40.4)	10658 (43.1)	7860 (45.4)	3175 (42.6)		67137 (40.2)	69442 (41.6)	73969 (44.3)	29081 (45.9)	46596 (45.0)		6238 (42.2)	6174 (41.8)	6544 (44.3)	3361 (44.5)	3057 (42.3)		14773 (43.1)	15018 (43.8)	14693 (42.9)	4590 (46.6)	10967 (44.9)		7246 (43.2)	7380 (44.0)	7135 (42.5)	2657 (45.4)	4768 (43.6)
	High	21093 (7.6)	21033 (7.6)	25013 (9.1)	19266 (9.4)	6168 (8.7)		1850 (8.5)	1568 (7.2)	2187 (10.0)	1792 (10.1)	369 (9.1)		4371 (6.2)	4249 (6.1)	5104 (7.3)	3534 (8.0)	2029 (7.8)		2061 (8.3)	1832 (7.4)	1805 (7.3)	1397 (8.1)	535 (7.2)		13388 (8.0)	10765 (6.5)	13911 (8.3)	4525 (7.1)	7383 (7.1)		1281 (8.7)	845 (5.7)	1375 (9.3)	602 (8.0)	569 (7.9)		2849 (8.3)	2173 (6.3)	2889 (8.4)	699 (7.1)	1827 (7.5)		1528 (9.1)	1106 (6.6)	1234 (7.4)	373 (6.4)	683 (6.3)
	Unknown	149320 (54.1)	140560 (51.0)	120762 (43.8)	74850 (36.5)	23977 (34.0)		10306 (47.1)	10428 (47.6)	8435 (38.5)	5621 (31.5)	1397 (34.4)		43960 (62.8)	42503 (60.7)	39421 (56.3)	21224 (48.3)	12262 (47.1)		13519 (54.6)	13153 (53.1)	12181 (49.2)	6817 (39.4)	3073 (41.3)		77322 (46.3)	69757 (41.8)	66838 (40.1)	19943 (31.5)	31519 (30.4)		6485 (43.9)	6434 (43.6)	5526 (37.4)	2288 (30.3)	2170 (30.0)		16219 (47.3)	15257 (44.5)	14623 (42.7)	3190 (32.4)	8008 (32.8)		7702 (45.9)	7271 (43.3)	7280 (43.4)	1950 (33.3)	3937 (36.0)
dbp_category	Normal	110367 (40.0)	112792 (40.9)	124785 (45.2)	93870 (45.7)	33295 (47.2)	<0.001	10579 (48.3)	9916 (45.3)	11264 (51.5)	9250 (51.9)	2117 (52.1)	<0.001	27768 (39.7)	28191 (40.3)	28994 (41.4)	18745 (42.7)	11124 (42.7)	<0.001	10859 (43.9)	10513 (42.5)	11424 (46.2)	8094 (46.8)	3449 (46.3)	<0.001	73691 (44.2)	82655 (49.5)	80131 (48.0)	33880 (53.5)	54719 (52.9)	<0.001	7543 (51.1)	7715 (52.2)	7779 (52.7)	4246 (56.3)	4049 (56.0)	<0.001	15487 (45.2)	16867 (49.2)	15357 (44.8)	5237 (53.2)	12501 (51.2)	<0.001	7869 (46.9)	8458 (50.4)	7929 (47.3)	3118 (53.3)	5682 (52.0)	<0.001
	Low	14113 (5.1)	16211 (5.9)	17442 (6.3)	15902 (7.7)	7059 (10.0)		1717 (7.8)	1751 (8.0)	1714 (7.8)	1741 (9.8)	409 (10.1)		2591 (3.7)	2884 (4.1)	3167 (4.5)	2378 (5.4)	1578 (6.1)		1167 (4.7)	1342 (5.4)	1500 (6.1)	1293 (7.5)	594 (8.0)		12911 (7.7)	17828 (10.7)	14630 (8.8)	8283 (13.1)	14391 (13.9)		1312 (8.9)	1657 (11.2)	1341 (9.1)	988 (13.1)	902 (12.5)		2448 (7.1)	3371 (9.8)	2859 (8.3)	1243 (12.6)	2964 (12.1)		1188 (7.1)	1691 (10.1)	1425 (8.5)	716 (12.2)	1241 (11.4)
	Elevated	106862 (38.7)	108420 (39.3)	125024 (45.3)	95765 (46.6)	31748 (45.0)		9150 (41.8)	8483 (38.8)	9699 (44.3)	7868 (44.1)	1725 (42.4)		26983 (38.6)	28431 (40.6)	29368 (42.0)	19897 (45.3)	11502 (44.2)		10026 (40.5)	9988 (40.4)	10658 (43.1)	7860 (45.4)	3175 (42.6)		67137 (40.2)	69442 (41.6)	73969 (44.3)	29081 (45.9)	46596 (45.0)		6238 (42.2)	6174 (41.8)	6544 (44.3)	3361 (44.5)	3057 (42.3)		14773 (43.1)	15018 (43.8)	14693 (42.9)	4590 (46.6)	10967 (44.9)		7246 (43.2)	7380 (44.0)	7135 (42.5)	2657 (45.4)	4768 (43.6)
	High	21093 (7.6)	21033 (7.6)	25013 (9.1)	19266 (9.4)	6168 (8.7)		1850 (8.5)	1568 (7.2)	2187 (10.0)	1792 (10.1)	369 (9.1)		4371 (6.2)	4249 (6.1)	5104 (7.3)	3534 (8.0)	2029 (7.8)		2061 (8.3)	1832 (7.4)	1805 (7.3)	1397 (8.1)	535 (7.2)		13388 (8.0)	10765 (6.5)	13911 (8.3)	4525 (7.1)	7383 (7.1)		1281 (8.7)	845 (5.7)	1375 (9.3)	602 (8.0)	569 (7.9)		2849 (8.3)	2173 (6.3)	2889 (8.4)	699 (7.1)	1827 (7.5)		1528 (9.1)	1106 (6.6)	1234 (7.4)	373 (6.4)	683 (6.3)
	Unknown	149320 (54.1)	140560 (51.0)	120762 (43.8)	74850 (36.5)	23977 (34.0)		10306 (47.1)	10428 (47.6)	8435 (38.5)	5621 (31.5)	1397 (34.4)		43960 (62.8)	42503 (60.7)	39421 (56.3)	21224 (48.3)	12262 (47.1)		13519 (54.6)	13153 (53.1)	12181 (49.2)	6817 (39.4)	3073 (41.3)		77322 (46.3)	69757 (41.8)	66838 (40.1)	19943 (31.5)	31519 (30.4)		6485 (43.9)	6434 (43.6)	5526 (37.4)	2288 (30.3)	2170 (30.0)		16219 (47.3)	15257 (44.5)	14623 (42.7)	3190 (32.4)	8008 (32.8)		7702 (45.9)	7271 (43.3)	7280 (43.4)	1950 (33.3)	3937 (36.0)
bmi_category	Normal weight	63117 (22.9)	65995 (23.9)	53301 (19.3)	36877 (18.0)	11387 (16.1)	<0.001	5254 (24.0)	4854 (22.2)	5403 (24.7)	4033 (22.6)	898 (22.1)	<0.001	15372 (22.0)	15786 (22.6)	15666 (22.4)	9258 (21.1)	5213 (20.0)	<0.001	5578 (22.5)	5313 (21.5)	6234 (25.2)	4066 (23.5)	1596 (21.4)	<0.001	39560 (23.7)	52614 (31.5)	33787 (20.3)	15739 (24.9)	24077 (23.3)	<0.001	3573 (24.2)	4316 (29.2)	3722 (25.2)	2051 (27.2)	2024 (28.0)	<0.001	7339 (21.4)	9967 (29.1)	7063 (20.6)	2606 (26.5)	6516 (26.7)	<0.001	3720 (22.2)	4866 (29.0)	4065 (24.2)	1740 (29.7)	3231 (29.6)	<0.001
	Underweight	3648 (1.3)	4911 (1.8)	2339 (0.8)	1772 (0.9)	667 (0.9)		372 (1.7)	448 (2.0)	277 (1.3)	249 (1.4)	67 (1.6)		694 (1.0)	808 (1.2)	734 (1.0)	430 (1.0)	317 (1.2)		312 (1.3)	359 (1.5)	474 (1.9)	283 (1.6)	150 (2.0)		2144 (1.3)	8851 (5.3)	1402 (0.8)	1753 (2.8)	2556 (2.5)		210 (1.4)	675 (4.6)	164 (1.1)	247 (3.3)	238 (3.3)		313 (0.9)	1417 (4.1)	343 (1.0)	296 (3.0)	885 (3.6)		212 (1.3)	688 (4.1)	285 (1.7)	244 (4.2)	491 (4.5)
	Overweight	68440 (24.8)	77352 (28.0)	81132 (29.4)	61273 (29.8)	20567 (29.2)		6034 (27.6)	6267 (28.6)	6820 (31.2)	5830 (32.7)	1221 (30.0)		17294 (24.7)	19710 (28.2)	18876 (27.0)	12604 (28.7)	7526 (28.9)		6408 (25.9)	6842 (27.6)	6630 (26.8)	4971 (28.7)	2126 (28.6)		46771 (28.0)	45458 (27.2)	53484 (32.1)	19715 (31.1)	31281 (30.2)		4397 (29.8)	4247 (28.8)	4930 (33.4)	2469 (32.7)	2241 (31.0)		10340 (30.2)	10040 (29.3)	10525 (30.7)	2902 (29.5)	7284 (29.8)		4971 (29.6)	4897 (29.2)	4892 (29.2)	1730 (29.6)	3127 (28.6)
	Obese	44648 (16.2)	63946 (23.2)	81226 (29.4)	79724 (38.8)	28312 (40.1)		4366 (19.9)	5625 (25.7)	4899 (22.4)	5581 (31.3)	1260 (31.0)		12795 (18.3)	18535 (26.5)	16180 (23.1)	14549 (33.1)	8569 (32.9)		4870 (19.7)	7046 (28.5)	5651 (22.8)	5693 (32.9)	2398 (32.2)		27641 (16.6)	32560 (19.5)	45053 (27.0)	20412 (32.2)	34441 (33.3)		2960 (20.0)	3290 (22.3)	3155 (21.4)	2125 (28.2)	1887 (26.1)		7206 (21.0)	8504 (24.8)	8585 (25.0)	3227 (32.8)	7192 (29.4)		3721 (22.2)	4253 (25.4)	3798 (22.6)	1574 (26.9)	2763 (25.3)
	Unknown	149320 (54.1)	140560 (51.0)	120762 (43.8)	74850 (36.5)	23977 (34.0)		10306 (47.1)	10428 (47.6)	8435 (38.5)	5621 (31.5)	1397 (34.4)		43960 (62.8)	42503 (60.7)	39421 (56.3)	21224 (48.3)	12262 (47.1)		13519 (54.6)	13153 (53.1)	12181 (49.2)	6817 (39.4)	3073 (41.3)		77322 (46.3)	69757 (41.8)	66838 (40.1)	19943 (31.5)	31519 (30.4)		6485 (43.9)	6434 (43.6)	5526 (37.4)	2288 (30.3)	2170 (30.0)		16219 (47.3)	15257 (44.5)	14623 (42.7)	3190 (32.4)	8008 (32.8)		7702 (45.9)	7271 (43.3)	7280 (43.4)	1950 (33.3)	3937 (36.0)
totalcholesterol_category	Desirable	87010 (31.5)	92318 (33.5)	109064 (39.5)	87354 (42.6)	33343 (47.3)	<0.001	8700 (39.7)	8540 (39.0)	9571 (43.7)	8246 (46.3)	1826 (44.9)	<0.001	18696 (26.7)	19940 (28.5)	21326 (30.5)	15131 (34.5)	9304 (35.7)	<0.001	7785 (31.5)	8070 (32.6)	9562 (38.6)	7357 (42.5)	3218 (43.2)	<0.001	65370 (39.2)	77158 (46.2)	75308 (45.1)	33411 (52.8)	56893 (55.0)	<0.001	6523 (44.2)	7164 (48.5)	6991 (47.3)	3961 (52.5)	3772 (52.2)	<0.001	13469 (39.3)	15557 (45.4)	14376 (41.9)	5147 (52.3)	12520 (51.3)	<0.001	6739 (40.2)	7583 (45.2)	7391 (44.1)	3047 (52.1)	5668 (51.9)	<0.001
	Borderline High	63947 (23.2)	67459 (24.5)	78674 (28.5)	65097 (31.7)	21763 (30.9)		5316 (24.3)	5241 (23.9)	6362 (29.1)	5691 (31.9)	1223 (30.1)		13641 (19.5)	14455 (20.7)	15963 (22.8)	11794 (26.9)	7037 (27.0)		5631 (22.8)	5882 (23.8)	6410 (25.9)	5257 (30.4)	2136 (28.7)		41917 (25.1)	42132 (25.3)	47097 (28.2)	18580 (29.3)	30198 (29.2)		3702 (25.1)	3465 (23.5)	4246 (28.7)	2254 (29.9)	2180 (30.2)		8671 (25.3)	8496 (24.8)	9350 (27.3)	2882 (29.3)	7211 (29.5)		4339 (25.9)	4233 (25.2)	4552 (27.1)	1752 (30.0)	3152 (28.8)
	High	21093 (7.6)	21033 (7.6)	25013 (9.1)	19266 (9.4)	6168 (8.7)		1850 (8.5)	1568 (7.2)	2187 (10.0)	1792 (10.1)	369 (9.1)		4371 (6.2)	4249 (6.1)	5104 (7.3)	3534 (8.0)	2029 (7.8)		2061 (8.3)	1832 (7.4)	1805 (7.3)	1397 (8.1)	535 (7.2)		13388 (8.0)	10765 (6.5)	13911 (8.3)	4525 (7.1)	7383 (7.1)		1281 (8.7)	845 (5.7)	1375 (9.3)	602 (8.0)	569 (7.9)		2849 (8.3)	2173 (6.3)	2889 (8.4)	699 (7.1)	1827 (7.5)		1528 (9.1)	1106 (6.6)	1234 (7.4)	373 (6.4)	683 (6.3)
	Unknown	149320 (54.1)	140560 (51.0)	120762 (43.8)	74850 (36.5)	23977 (34.0)		10306 (47.1)	10428 (47.6)	8435 (38.5)	5621 (31.5)	1397 (34.4)		43960 (62.8)	42503 (60.7)	39421 (56.3)	21224 (48.3)	12262 (47.1)		13519 (54.6)	13153 (53.1)	12181 (49.2)	6817 (39.4)	3073 (41.3)		77322 (46.3)	69757 (41.8)	66838 (40.1)	19943 (31.5)	31519 (30.4)		6485 (43.9)	6434 (43.6)	5526 (37.4)	2288 (30.3)	2170 (30.0)		16219 (47.3)	15257 (44.5)	14623 (42.7)	3190 (32.4)	8008 (32.8)		7702 (45.9)	7271 (43.3)	7280 (43.4)	1950 (33.3)	3937 (36.0)
smoking_status_final	non_smoker	84448 (30.6)	69636 (25.2)	87000 (31.5)	47983 (23.4)	15904 (22.5)	<0.001	6566 (30.0)	5360 (24.5)	6800 (31.1)	4116 (23.1)	997 (24.5)	<0.001	22852 (32.7)	19811 (28.3)	18784 (26.8)	9187 (20.9)	5117 (19.6)	<0.001	7616 (30.8)	6435 (26.0)	7082 (28.6)	3751 (21.7)	1704 (22.9)	<0.001	49300 (29.5)	8731 (5.2)	50462 (30.2)	3207 (5.1)	6380 (6.2)	<0.001	4305 (29.1)	1042 (7.1)	4602 (31.2)	446 (5.9)	647 (9.0)	<0.001	10145 (29.6)	1650 (4.8)	8356 (24.4)	289 (2.9)	782 (3.2)	<0.001	4891 (29.2)	873 (5.2)	4518 (26.9)	264 (4.5)	695 (6.4)	<0.001
	active_smoker	60432 (21.9)	65634 (23.8)	64184 (23.3)	52921 (25.8)	17997 (25.5)		4608 (21.1)	4439 (20.3)	4201 (19.2)	3524 (19.8)	782 (19.2)		17194 (24.6)	18377 (26.3)	21641 (30.9)	14339 (32.6)	8505 (32.7)		6279 (25.4)	6348 (25.7)	6434 (26.0)	4968 (28.7)	1998 (26.8)		31232 (18.7)	76953 (46.1)	30412 (18.2)	26075 (41.2)	45505 (44.0)		2834 (19.2)	5900 (39.9)	2396 (16.2)	2534 (33.6)	2500 (34.6)		7378 (21.5)	16996 (49.6)	8233 (24.0)	4554 (46.2)	12606 (51.6)		3907 (23.3)	8274 (49.3)	3544 (21.1)	2517 (43.0)	4780 (43.7)
	ex_smoker	92281 (33.5)	112586 (40.8)	111925 (40.6)	95821 (46.7)	33262 (47.2)		8372 (38.3)	9665 (44.2)	9851 (45.0)	9476 (53.2)	2065 (50.8)		21508 (30.7)	26220 (37.5)	25769 (36.8)	18673 (42.5)	11156 (42.8)		8181 (33.1)	9711 (39.2)	9709 (39.2)	7757 (44.8)	3299 (44.3)		64657 (38.8)	69208 (41.5)	75728 (45.4)	31389 (49.6)	47336 (45.7)		6158 (41.7)	6800 (46.0)	6972 (47.2)	4284 (56.8)	3803 (52.6)		13428 (39.2)	13747 (40.1)	15337 (44.7)	4657 (47.3)	10177 (41.7)		6577 (39.2)	6731 (40.1)	7420 (44.2)	2816 (48.1)	4914 (45.0)
	unknown	6256 (2.3)	6265 (2.3)	4540 (1.6)	4828 (2.4)	1523 (2.2)		400 (1.8)	347 (1.6)	306 (1.4)	294 (1.6)	75 (1.8)		1456 (2.1)	1450 (2.1)	1261 (1.8)	1194 (2.7)	678 (2.6)		558 (2.3)	485 (2.0)	412 (1.7)	463 (2.7)	189 (2.5)		3391 (2.0)	2299 (1.4)	2358 (1.4)	1161 (1.8)	1860 (1.8)		247 (1.7)	131 (0.9)	171 (1.2)	102 (1.4)	120 (1.7)		609 (1.8)	400 (1.2)	572 (1.7)	199 (2.0)	518 (2.1)		304 (1.8)	174 (1.0)	262 (1.6)	125 (2.1)	205 (1.9)
pa_level	pa_level0	21296 (7.7)	27510 (10.0)	29641 (10.7)	27880 (13.6)	11233 (15.9)	<0.001	2705 (12.4)	2963 (13.5)	2524 (11.5)	2579 (14.5)	599 (14.7)	<0.001	4596 (6.6)	5907 (8.4)	5836 (8.3)	4795 (10.9)	2780 (10.7)	<0.001	2318 (9.4)	2507 (10.1)	3034 (12.3)	2683 (15.5)	1336 (17.9)	<0.001	15527 (9.3)	25514 (15.3)	19765 (11.8)	12439 (19.6)	20647 (19.9)	<0.001	1785 (12.1)	2488 (16.8)	1775 (12.0)	1390 (18.4)	1282 (17.7)	<0.001	3368 (9.8)	5188 (15.1)	3782 (11.0)	1930 (19.6)	4290 (17.6)	<0.001	1898 (11.3)	2712 (16.2)	2307 (13.8)	1182 (20.2)	2331 (21.3)	<0.001
	pa_level1	49622 (18.0)	57301 (20.8)	60812 (22.0)	50390 (24.5)	18028 (25.6)		4790 (21.9)	4766 (21.8)	5044 (23.0)	4624 (25.9)	1017 (25.0)		11475 (16.4)	13157 (18.8)	13064 (18.7)	9165 (20.9)	5544 (21.3)		4284 (17.3)	4906 (19.8)	5198 (21.0)	4144 (24.0)	1793 (24.1)		33190 (19.9)	40542 (24.3)	37353 (22.4)	17732 (28.0)	27804 (26.9)		3360 (22.7)	3599 (24.4)	3409 (23.1)	2072 (27.5)	1978 (27.4)		6756 (19.7)	8008 (23.4)	7173 (20.9)	2673 (27.1)	6351 (26.0)		3344 (19.9)	4138 (24.7)	3605 (21.5)	1585 (27.1)	2729 (25.0)
	pa_level2	45969 (16.7)	41809 (15.2)	48906 (17.7)	35962 (17.5)	9784 (13.9)		3248 (14.8)	2738 (12.5)	3582 (16.4)	2804 (15.7)	502 (12.3)		11437 (16.3)	10967 (15.7)	11320 (16.2)	7338 (16.7)	4016 (15.4)		4004 (16.2)	3613 (14.6)	3834 (15.5)	2660 (15.4)	803 (10.8)		29530 (17.7)	21129 (12.7)	30149 (18.1)	8345 (13.2)	13124 (12.7)		2282 (15.4)	1621 (11.0)	2596 (17.6)	959 (12.7)	819 (11.3)		6353 (18.5)	4644 (13.5)	6050 (17.7)	1256 (12.8)	3418 (14.0)		3059 (18.2)	2195 (13.1)	2661 (15.9)	783 (13.4)	1157 (10.6)
	pa_level3	6068 (2.2)	7045 (2.6)	6650 (2.4)	5476 (2.7)	1447 (2.1)		436 (2.0)	420 (1.9)	400 (1.8)	331 (1.9)	63 (1.5)		1964 (2.8)	2461 (3.5)	2055 (2.9)	1424 (3.2)	787 (3.0)		530 (2.1)	618 (2.5)	463 (1.9)	384 (2.2)	133 (1.8)		3359 (2.0)	2424 (1.5)	3770 (2.3)	979 (1.5)	1502 (1.5)		313 (2.1)	176 (1.2)	277 (1.9)	117 (1.6)	96 (1.3)		848 (2.5)	509 (1.5)	818 (2.4)	140 (1.4)	440 (1.8)		398 (2.4)	235 (1.4)	295 (1.8)	96 (1.6)	132 (1.2)
	unknown	6256 (2.3)	6265 (2.3)	4540 (1.6)	4828 (2.4)	1523 (2.2)		400 (1.8)	347 (1.6)	306 (1.4)	294 (1.6)	75 (1.8)		1456 (2.1)	1450 (2.1)	1261 (1.8)	1194 (2.7)	678 (2.6)		558 (2.3)	485 (2.0)	412 (1.7)	463 (2.7)	189 (2.5)		3391 (2.0)	2299 (1.4)	2358 (1.4)	1161 (1.8)	1860 (1.8)		247 (1.7)	131 (0.9)	171 (1.2)	102 (1.4)	120 (1.7)		609 (1.8)	400 (1.2)	572 (1.7)	199 (2.0)	518 (2.1)		304 (1.8)	174 (1.0)	262 (1.6)	125 (2.1)	205 (1.9)
triglyceride_category	Normal	98963 (35.9)	103828 (37.6)	116618 (42.3)	93963 (45.8)	32918 (46.7)	<0.001	9198 (42.0)	8891 (40.6)	10092 (46.1)	8953 (50.2)	1878 (46.2)	<0.001	19764 (28.2)	20796 (29.7)	22229 (31.8)	15454 (35.2)	9600 (36.9)	<0.001	8709 (35.2)	8732 (35.3)	9962 (40.3)	7742 (44.7)	3224 (43.3)	<0.001	69904 (41.9)	74019 (44.4)	75630 (45.3)	30917 (48.8)	50608 (48.9)	<0.001	6474 (43.8)	6551 (44.4)	6976 (47.2)	3823 (50.7)	3583 (49.6)	<0.001	13767 (40.2)	14120 (41.2)	14283 (41.7)	4641 (47.1)	11304 (46.3)	<0.001	6936 (41.3)	7028 (41.9)	7361 (43.9)	2940 (50.3)	5263 (48.2)	<0.001
	Borderline High	63947 (23.2)	67459 (24.5)	78674 (28.5)	65097 (31.7)	21763 (30.9)		5316 (24.3)	5241 (23.9)	6362 (29.1)	5691 (31.9)	1223 (30.1)		13641 (19.5)	14455 (20.7)	15963 (22.8)	11794 (26.9)	7037 (27.0)		5631 (22.8)	5882 (23.8)	6410 (25.9)	5257 (30.4)	2136 (28.7)		41917 (25.1)	42132 (25.3)	47097 (28.2)	18580 (29.3)	30198 (29.2)		3702 (25.1)	3465 (23.5)	4246 (28.7)	2254 (29.9)	2180 (30.2)		8671 (25.3)	8496 (24.8)	9350 (27.3)	2882 (29.3)	7211 (29.5)		4339 (25.9)	4233 (25.2)	4552 (27.1)	1752 (30.0)	3152 (28.8)
	High	21093 (7.6)	21033 (7.6)	25013 (9.1)	19266 (9.4)	6168 (8.7)		1850 (8.5)	1568 (7.2)	2187 (10.0)	1792 (10.1)	369 (9.1)		4371 (6.2)	4249 (6.1)	5104 (7.3)	3534 (8.0)	2029 (7.8)		2061 (8.3)	1832 (7.4)	1805 (7.3)	1397 (8.1)	535 (7.2)		13388 (8.0)	10765 (6.5)	13911 (8.3)	4525 (7.1)	7383 (7.1)		1281 (8.7)	845 (5.7)	1375 (9.3)	602 (8.0)	569 (7.9)		2849 (8.3)	2173 (6.3)	2889 (8.4)	699 (7.1)	1827 (7.5)		1528 (9.1)	1106 (6.6)	1234 (7.4)	373 (6.4)	683 (6.3)
	Unknown	149320 (54.1)	140560 (51.0)	120762 (43.8)	74850 (36.5)	23977 (34.0)		10306 (47.1)	10428 (47.6)	8435 (38.5)	5621 (31.5)	1397 (34.4)		43960 (62.8)	42503 (60.7)	39421 (56.3)	21224 (48.3)	12262 (47.1)		13519 (54.6)	13153 (53.1)	12181 (49.2)	6817 (39.4)	3073 (41.3)		77322 (46.3)	69757 (41.8)	66838 (40.1)	19943 (31.5)	31519 (30.4)		6485 (43.9)	6434 (43.6)	5526 (37.4)	2288 (30.3)	2170 (30.0)		16219 (47.3)	15257 (44.5)	14623 (42.7)	3190 (32.4)	8008 (32.8)		7702 (45.9)	7271 (43.3)	7280 (43.4)	1950 (33.3)	3937 (36.0)
alcohol_consumption_level	0	19470 (7.1)	23295 (8.4)	24767 (9.0)	19355 (9.4)	7554 (10.7)	<0.001	1931 (8.8)	2349 (10.7)	2059 (9.4)	1800 (10.1)	456 (11.2)	<0.001	4357 (6.2)	5669 (8.1)	5137 (7.3)	3536 (8.1)	2271 (8.7)	<0.001	1909 (7.7)	2396 (9.7)	2607 (10.5)	1988 (11.5)	997 (13.4)	<0.001	12034 (7.2)	15233 (9.1)	15230 (9.1)	6208 (9.8)	10799 (10.4)	<0.001	1233 (8.3)	1611 (10.9)	1340 (9.1)	726 (9.6)	815 (11.3)	<0.001	2368 (6.9)	3605 (10.5)	2607 (7.6)	969 (9.8)	2239 (9.2)	<0.001	1285 (7.7)	1645 (9.8)	1685 (10.0)	683 (11.7)	1341 (12.3)	<0.001
	1	189436 (68.7)	199202 (72.2)	215058 (78.0)	161396 (78.6)	54329 (77.0)		15786 (72.1)	15445 (70.6)	16954 (77.5)	13901 (78.0)	3084 (75.9)		49476 (70.7)	51800 (74.0)	53323 (76.2)	34034 (77.5)	19835 (76.1)		17732 (71.7)	18103 (73.2)	18389 (74.3)	13131 (75.9)	5445 (73.1)		117813 (70.6)	122841 (73.6)	128606 (77.1)	49252 (77.8)	80097 (77.4)		10820 (73.3)	10931 (74.0)	11461 (77.6)	5902 (78.2)	5584 (77.3)		25408 (74.1)	25546 (74.5)	26273 (76.7)	7612 (77.3)	18891 (77.3)		12553 (74.8)	12844 (76.6)	12437 (74.1)	4456 (76.2)	8181 (74.9)
	2	180525 (65.4)	180525 (65.4)	180525 (65.4)	134092 (65.3)	46433 (65.8)		15973 (73.0)	15973 (73.0)	15973 (73.0)	12858 (72.1)	3115 (76.6)		39341 (56.2)	39341 (56.2)	39341 (56.2)	23956 (54.5)	15385 (59.1)		18510 (74.8)	18510 (74.8)	18510 (74.8)	12820 (74.1)	5690 (76.4)		90390 (54.2)	90390 (54.2)	90390 (54.2)	34211 (54.0)	56179 (54.3)		9098 (61.6)	9098 (61.6)	9098 (61.6)	4501 (59.6)	4597 (63.6)		16931 (49.4)	16931 (49.4)	16931 (49.4)	4710 (47.8)	12221 (50.0)		10130 (60.4)	10130 (60.4)	10130 (60.4)	3426 (58.6)	6704 (61.4)
	3	52780 (19.1)	53404 (19.4)	53237 (19.3)	38531 (18.8)	13090 (18.6)		3633 (16.6)	3889 (17.8)	4379 (20.0)	3585 (20.1)	832 (20.5)		11685 (16.7)	12544 (17.9)	13597 (19.4)	8298 (18.9)	4867 (18.7)		3965 (16.0)	4162 (16.8)	4832 (19.5)	3308 (19.1)	1418 (19.0)		31646 (19.0)	31635 (19.0)	31772 (19.0)	11369 (18.0)	18658 (18.0)		2478 (16.8)	2500 (16.9)	2952 (20.0)	1535 (20.3)	1463 (20.2)		5761 (16.8)	6189 (18.1)	6682 (19.5)	1775 (18.0)	4442 (18.2)		2835 (16.9)	2802 (16.7)	3285 (19.6)	1073 (18.3)	2063 (18.9)
	unknown	6256 (2.3)	6265 (2.3)	4540 (1.6)	4828 (2.4)	1523 (2.2)		400 (1.8)	347 (1.6)	306 (1.4)	294 (1.6)	75 (1.8)		1456 (2.1)	1450 (2.1)	1261 (1.8)	1194 (2.7)	678 (2.6)		558 (2.3)	485 (2.0)	412 (1.7)	463 (2.7)	189 (2.5)		3391 (2.0)	2299 (1.4)	2358 (1.4)	1161 (1.8)	1860 (1.8)		247 (1.7)	131 (0.9)	171 (1.2)	102 (1.4)	120 (1.7)		609 (1.8)	400 (1.2)	572 (1.7)	199 (2.0)	518 (2.1)		304 (1.8)	174 (1.0)	262 (1.6)	125 (2.1)	205 (1.9)
albumin_category	Normal	162096 (58.8)	171219 (62.1)	200846 (72.8)	159358 (77.6)	55140 (78.2)	<0.001	15168 (69.3)	14568 (66.6)	16788 (76.7)	14243 (79.9)	3161 (77.8)	<0.001	38513 (55.0)	40902 (58.5)	43237 (61.8)	30042 (68.4)	18002 (69.1)	<0.001	15586 (63.0)	15906 (64.3)	18342 (74.1)	13596 (78.6)	5668 (76.1)	<0.001	108911 (65.3)	118433 (71.0)	123686 (74.1)	50770 (80.2)	82907 (80.1)	<0.001	10624 (71.9)	10613 (71.9)	11220 (76.0)	5900 (78.2)	5730 (79.3)	<0.001	23424 (68.3)	24714 (72.1)	23910 (69.8)	7812 (79.3)	19242 (78.8)	<0.001	11937 (71.2)	12380 (73.8)	12139 (72.4)	4587 (78.4)	8433 (77.2)	<0.001
	Low	14113 (5.1)	16211 (5.9)	17442 (6.3)	15902 (7.7)	7059 (10.0)		1717 (7.8)	1751 (8.0)	1714 (7.8)	1741 (9.8)	409 (10.1)		2591 (3.7)	2884 (4.1)	3167 (4.5)	2378 (5.4)	1578 (6.1)		1167 (4.7)	1342 (5.4)	1500 (6.1)	1293 (7.5)	594 (8.0)		12911 (7.7)	17828 (10.7)	14630 (8.8)	8283 (13.1)	14391 (13.9)		1312 (8.9)	1657 (11.2)	1341 (9.1)	988 (13.1)	902 (12.5)		2448 (7.1)	3371 (9.8)	2859 (8.3)	1243 (12.6)	2964 (12.1)		1188 (7.1)	1691 (10.1)	1425 (8.5)	716 (12.2)	1241 (11.4)
	High	21093 (7.6)	21033 (7.6)	25013 (9.1)	19266 (9.4)	6168 (8.7)		1850 (8.5)	1568 (7.2)	2187 (10.0)	1792 (10.1)	369 (9.1)		4371 (6.2)	4249 (6.1)	5104 (7.3)	3534 (8.0)	2029 (7.8)		2061 (8.3)	1832 (7.4)	1805 (7.3)	1397 (8.1)	535 (7.2)		13388 (8.0)	10765 (6.5)	13911 (8.3)	4525 (7.1)	7383 (7.1)		1281 (8.7)	845 (5.7)	1375 (9.3)	602 (8.0)	569 (7.9)		2849 (8.3)	2173 (6.3)	2889 (8.4)	699 (7.1)	1827 (7.5)		1528 (9.1)	1106 (6.6)	1234 (7.4)	373 (6.4)	683 (6.3)
	Unknown	149320 (54.1)	140560 (51.0)	120762 (43.8)	74850 (36.5)	23977 (34.0)		10306 (47.1)	10428 (47.6)	8435 (38.5)	5621 (31.5)	1397 (34.4)		43960 (62.8)	42503 (60.7)	39421 (56.3)	21224 (48.3)	12262 (47.1)		13519 (54.6)	13153 (53.1)	12181 (49.2)	6817 (39.4)	3073 (41.3)		77322 (46.3)	69757 (41.8)	66838 (40.1)	19943 (31.5)	31519 (30.4)		6485 (43.9)	6434 (43.6)	5526 (37.4)	2288 (30.3)	2170 (30.0)		16219 (47.3)	15257 (44.5)	14623 (42.7)	3190 (32.4)	8008 (32.8)		7702 (45.9)	7271 (43.3)	7280 (43.4)	1950 (33.3)	3937 (36.0)
ethnicity_16cat	British	218667 (79.3)	232078 (84.1)	235129 (85.2)	175971 (85.7)	60486 (85.7)	<0.001	19167 (87.6)	19180 (87.6)	20089 (91.8)	16300 (91.5)	3686 (90.7)	<0.001	54734 (78.2)	58798 (84.0)	58358 (83.4)	37667 (85.8)	22751 (87.3)	<0.001	20098 (81.2)	21181 (85.6)	20873 (84.3)	14690 (84.9)	6188 (83.1)	<0.001	137915 (82.7)	152265 (91.3)	147042 (88.1)	58202 (91.9)	95498 (92.2)	<0.001	13082 (88.6)	13686 (92.7)	13664 (92.5)	7130 (94.5)	6820 (94.4)	<0.001	29227 (85.3)	31395 (91.6)	30212 (88.1)	9003 (91.4)	22574 (92.4)	<0.001	14411 (85.9)	15572 (92.8)	14648 (87.3)	5403 (92.4)	10082 (92.3)	<0.001
	Irish	2463 (0.9)	3081 (1.1)	2664 (1.0)	2053 (1.0)	808 (1.1)		169 (0.8)	268 (1.2)	200 (0.9)	193 (1.1)	57 (1.4)		465 (0.7)	581 (0.8)	891 (1.3)	502 (1.1)	353 (1.4)		216 (0.9)	256 (1.0)	240 (1.0)	189 (1.1)	91 (1.2)		1494 (0.9)	2599 (1.6)	1714 (1.0)	1031 (1.6)	1498 (1.4)		119 (0.8)	226 (1.5)	117 (0.8)	110 (1.5)	90 (1.2)		220 (0.6)	537 (1.6)	465 (1.4)	200 (2.0)	439 (1.8)		139 (0.8)	261 (1.6)	178 (1.1)	80 (1.4)	170 (1.6)
	Other White	9230 (3.3)	8377 (3.0)	7483 (2.7)	5026 (2.4)	1774 (2.5)		525 (2.4)	482 (2.2)	361 (1.6)	347 (1.9)	86 (2.1)		3129 (4.5)	1977 (2.8)	2704 (3.9)	1202 (2.7)	704 (2.7)		927 (3.7)	688 (2.8)	786 (3.2)	434 (2.5)	204 (2.7)		4205 (2.5)	3697 (2.2)	3667 (2.2)	1259 (2.0)	2066 (2.0)		321 (2.2)	293 (2.0)	249 (1.7)	122 (1.6)	126 (1.7)		836 (2.4)	746 (2.2)	873 (2.5)	232 (2.4)	517 (2.1)		482 (2.9)	325 (1.9)	416 (2.5)	123 (2.1)	208 (1.9)
	White and Black Caribbean	424 (0.2)	612 (0.2)	481 (0.2)	500 (0.2)	146 (0.2)		37 (0.2)	32 (0.1)	10 (0.0)	23 (0.1)	3 (0.1)		110 (0.2)	154 (0.2)	90 (0.1)	80 (0.2)	40 (0.2)		53 (0.2)	57 (0.2)	38 (0.2)	54 (0.3)	25 (0.3)		237 (0.1)	154 (0.1)	238 (0.1)	61 (0.1)	83 (0.1)		25 (0.2)	6 (0.0)	7 (0.0)	5 (0.1)	1 (0.0)		57 (0.2)	32 (0.1)	32 (0.1)	8 (0.1)	12 (0.0)		36 (0.2)	9 (0.1)	26 (0.2)	2 (0.0)	18 (0.2)
	White and Black African	333 (0.1)	283 (0.1)	301 (0.1)	215 (0.1)	74 (0.1)		16 (0.1)	18 (0.1)	8 (0.0)	14 (0.1)	2 (0.0)		155 (0.2)	88 (0.1)	50 (0.1)	28 (0.1)	16 (0.1)		42 (0.2)	33 (0.1)	23 (0.1)	24 (0.1)	11 (0.1)		118 (0.1)	61 (0.0)	123 (0.1)	18 (0.0)	42 (0.0)		17 (0.1)	5 (0.0)	3 (0.0)	1 (0.0)	0 (0.0)		29 (0.1)	14 (0.0)	15 (0.0)	5 (0.1)	7 (0.0)		18 (0.1)	6 (0.0)	11 (0.1)	2 (0.0)	0 (0.0)
	White and Asian	299 (0.1)	374 (0.1)	281 (0.1)	241 (0.1)	65 (0.1)		16 (0.1)	17 (0.1)	11 (0.1)	11 (0.1)	3 (0.1)		129 (0.2)	103 (0.1)	119 (0.2)	67 (0.2)	36 (0.1)		37 (0.1)	33 (0.1)	32 (0.1)	27 (0.2)	7 (0.1)		140 (0.1)	73 (0.0)	121 (0.1)	34 (0.1)	57 (0.1)		8 (0.1)	6 (0.0)	5 (0.0)	0 (0.0)	2 (0.0)		31 (0.1)	12 (0.0)	37 (0.1)	4 (0.0)	9 (0.0)		12 (0.1)	7 (0.0)	22 (0.1)	4 (0.1)	5 (0.0)
	Other Mixed	746 (0.3)	781 (0.3)	596 (0.2)	477 (0.2)	155 (0.2)		35 (0.2)	29 (0.1)	28 (0.1)	24 (0.1)	5 (0.1)		223 (0.3)	224 (0.3)	203 (0.3)	139 (0.3)	65 (0.2)		76 (0.3)	71 (0.3)	88 (0.4)	58 (0.3)	21 (0.3)		282 (0.2)	205 (0.1)	267 (0.2)	75 (0.1)	107 (0.1)		16 (0.1)	12 (0.1)	15 (0.1)	6 (0.1)	7 (0.1)		56 (0.2)	45 (0.1)	67 (0.2)	14 (0.1)	33 (0.1)		31 (0.2)	14 (0.1)	42 (0.3)	12 (0.2)	12 (0.1)
	Indian	4523 (1.6)	5375 (1.9)	6481 (2.3)	4903 (2.4)	1703 (2.4)		231 (1.1)	445 (2.0)	271 (1.2)	192 (1.1)	54 (1.3)		1572 (2.2)	1572 (2.2)	1347 (1.9)	880 (2.0)	419 (1.6)		413 (1.7)	458 (1.9)	693 (2.8)	471 (2.7)	244 (3.3)		2407 (1.4)	980 (0.6)	3671 (2.2)	517 (0.8)	802 (0.8)		160 (1.1)	85 (0.6)	189 (1.3)	25 (0.3)	27 (0.4)		531 (1.5)	239 (0.7)	527 (1.5)	71 (0.7)	136 (0.6)		243 (1.4)	83 (0.5)	408 (2.4)	52 (0.9)	86 (0.8)
	Pakistani	1809 (0.7)	2594 (0.9)	2721 (1.0)	2983 (1.5)	1029 (1.5)		90 (0.4)	191 (0.9)	83 (0.4)	124 (0.7)	35 (0.9)		633 (0.9)	818 (1.2)	671 (1.0)	504 (1.1)	226 (0.9)		205 (0.8)	267 (1.1)	306 (1.2)	247 (1.4)	150 (2.0)		846 (0.5)	552 (0.3)	1232 (0.7)	328 (0.5)	503 (0.5)		73 (0.5)	37 (0.3)	36 (0.2)	15 (0.2)	13 (0.2)		214 (0.6)	137 (0.4)	196 (0.6)	32 (0.3)	78 (0.3)		110 (0.7)	45 (0.3)	123 (0.7)	38 (0.6)	44 (0.4)
	Bangladeshi	479 (0.2)	843 (0.3)	521 (0.2)	831 (0.4)	268 (0.4)		41 (0.2)	71 (0.3)	24 (0.1)	31 (0.2)	10 (0.2)		242 (0.3)	217 (0.3)	142 (0.2)	189 (0.4)	82 (0.3)		135 (0.5)	108 (0.4)	68 (0.3)	82 (0.5)	49 (0.7)		268 (0.2)	203 (0.1)	230 (0.1)	153 (0.2)	184 (0.2)		36 (0.2)	26 (0.2)	9 (0.1)	6 (0.1)	5 (0.1)		82 (0.2)	43 (0.1)	52 (0.2)	27 (0.3)	43 (0.2)		51 (0.3)	27 (0.2)	33 (0.2)	11 (0.2)	19 (0.2)
	Other Asian	2544 (0.9)	2910 (1.1)	2605 (0.9)	1976 (1.0)	663 (0.9)		97 (0.4)	185 (0.8)	75 (0.3)	78 (0.4)	28 (0.7)		713 (1.0)	690 (1.0)	721 (1.0)	429 (1.0)	217 (0.8)		175 (0.7)	203 (0.8)	265 (1.1)	190 (1.1)	97 (1.3)		1128 (0.7)	585 (0.4)	1171 (0.7)	219 (0.3)	309 (0.3)		43 (0.3)	44 (0.3)	42 (0.3)	10 (0.1)	15 (0.2)		183 (0.5)	137 (0.4)	255 (0.7)	40 (0.4)	62 (0.3)		72 (0.4)	52 (0.3)	126 (0.8)	19 (0.3)	21 (0.2)
	Caribbean	2811 (1.0)	3218 (1.2)	3367 (1.2)	2856 (1.4)	955 (1.4)		116 (0.5)	214 (1.0)	75 (0.3)	88 (0.5)	14 (0.3)		318 (0.5)	566 (0.8)	320 (0.5)	248 (0.6)	103 (0.4)		129 (0.5)	203 (0.8)	289 (1.2)	246 (1.4)	110 (1.5)		1685 (1.0)	889 (0.5)	1513 (0.9)	336 (0.5)	571 (0.6)		74 (0.5)	49 (0.3)	46 (0.3)	12 (0.2)	12 (0.2)		179 (0.5)	143 (0.4)	142 (0.4)	29 (0.3)	46 (0.2)		105 (0.6)	52 (0.3)	175 (1.0)	27 (0.5)	66 (0.6)
	African	2672 (1.0)	2063 (0.7)	3182 (1.2)	1722 (0.8)	624 (0.9)		108 (0.5)	121 (0.6)	71 (0.3)	51 (0.3)	15 (0.4)		642 (0.9)	530 (0.8)	248 (0.4)	134 (0.3)	58 (0.2)		271 (1.1)	199 (0.8)	172 (0.7)	118 (0.7)	63 (0.8)		1043 (0.6)	268 (0.2)	965 (0.6)	108 (0.2)	189 (0.2)		57 (0.4)	21 (0.1)	33 (0.2)	7 (0.1)	3 (0.0)		204 (0.6)	72 (0.2)	83 (0.2)	9 (0.1)	21 (0.1)		102 (0.6)	20 (0.1)	70 (0.4)	5 (0.1)	20 (0.2)
	Other Black	942 (0.3)	1069 (0.4)	1134 (0.4)	859 (0.4)	266 (0.4)		75 (0.3)	81 (0.4)	24 (0.1)	28 (0.2)	7 (0.2)		332 (0.5)	367 (0.5)	141 (0.2)	98 (0.2)	49 (0.2)		189 (0.8)	162 (0.7)	79 (0.3)	72 (0.4)	40 (0.5)		413 (0.2)	173 (0.1)	413 (0.2)	78 (0.1)	127 (0.1)		64 (0.4)	21 (0.1)	14 (0.1)	3 (0.0)	6 (0.1)		166 (0.5)	48 (0.1)	40 (0.1)	5 (0.1)	11 (0.0)		93 (0.6)	23 (0.1)	48 (0.3)	1 (0.0)	17 (0.2)
	Chinese	1165 (0.4)	632 (0.2)	537 (0.2)	306 (0.1)	96 (0.1)		52 (0.2)	36 (0.2)	19 (0.1)	12 (0.1)	2 (0.0)		434 (0.6)	142 (0.2)	215 (0.3)	76 (0.2)	41 (0.2)		144 (0.6)	53 (0.2)	65 (0.3)	29 (0.2)	5 (0.1)		541 (0.3)	158 (0.1)	287 (0.2)	35 (0.1)	56 (0.1)		31 (0.2)	7 (0.0)	10 (0.1)	1 (0.0)	2 (0.0)		127 (0.4)	31 (0.1)	87 (0.3)	5 (0.1)	12 (0.0)		55 (0.3)	14 (0.1)	35 (0.2)	5 (0.1)	9 (0.1)
	Other Ethnic group	2286 (0.8)	2020 (0.7)	1823 (0.7)	1221 (0.6)	452 (0.6)		123 (0.6)	116 (0.5)	78 (0.4)	46 (0.3)	9 (0.2)		810 (1.2)	523 (0.7)	550 (0.8)	286 (0.7)	137 (0.5)		279 (1.1)	192 (0.8)	200 (0.8)	118 (0.7)	48 (0.6)		1010 (0.6)	589 (0.4)	855 (0.5)	177 (0.3)	323 (0.3)		73 (0.5)	46 (0.3)	46 (0.3)	11 (0.1)	13 (0.2)		253 (0.7)	117 (0.3)	197 (0.6)	25 (0.3)	61 (0.2)		106 (0.6)	54 (0.3)	102 (0.6)	15 (0.3)	31 (0.3)
	Unknown	149320 (54.1)	140560 (51.0)	120762 (43.8)	74850 (36.5)	23977 (34.0)		10306 (47.1)	10428 (47.6)	8435 (38.5)	5621 (31.5)	1397 (34.4)		43960 (62.8)	42503 (60.7)	39421 (56.3)	21224 (48.3)	12262 (47.1)		13519 (54.6)	13153 (53.1)	12181 (49.2)	6817 (39.4)	3073 (41.3)		77322 (46.3)	69757 (41.8)	66838 (40.1)	19943 (31.5)	31519 (30.4)		6485 (43.9)	6434 (43.6)	5526 (37.4)	2288 (30.3)	2170 (30.0)		16219 (47.3)	15257 (44.5)	14623 (42.7)	3190 (32.4)	8008 (32.8)		7702 (45.9)	7271 (43.3)	7280 (43.4)	1950 (33.3)	3937 (36.0)
region	London	33813 (12.3)	37443 (13.6)	33136 (12.0)	27730 (13.5)	9414 (13.3)	<0.001	1169 (5.3)	1990 (9.1)	1620 (7.4)	1654 (9.3)	463 (11.4)	<0.001	3972 (5.7)	5678 (8.1)	9624 (13.8)	6573 (15.0)	3512 (13.5)	<0.001	1977 (8.0)	1949 (7.9)	3176 (12.8)	2592 (15.0)	1250 (16.8)	<0.001	18440 (11.1)	19866 (11.9)	15982 (9.6)	7724 (12.2)	11895 (11.5)	<0.001	664 (4.5)	1241 (8.4)	990 (6.7)	705 (9.3)	757 (10.5)	<0.001	1685 (4.9)	3586 (10.5)	3658 (10.7)	1356 (13.8)	3138 (12.8)	<0.001	1013 (6.0)	1153 (6.9)	1849 (11.0)	778 (13.3)	1412 (12.9)	<0.001
	E	14358 (5.2)	15039 (5.5)	13624 (4.9)	9701 (4.7)	3099 (4.4)		2350 (10.7)	1589 (7.3)	1512 (6.9)	1188 (6.7)	238 (5.9)		3581 (5.1)	2983 (4.3)	3866 (5.5)	2334 (5.3)	1344 (5.2)		3491 (14.1)	2336 (9.4)	1289 (5.2)	827 (4.8)	309 (4.1)		9566 (5.7)	7742 (4.6)	7628 (4.6)	2363 (3.7)	4065 (3.9)		1863 (12.6)	741 (5.0)	915 (6.2)	444 (5.9)	460 (6.4)		3397 (9.9)	1138 (3.3)	1963 (5.7)	401 (4.1)	1055 (4.3)		2535 (15.1)	791 (4.7)	836 (5.0)	224 (3.8)	441 (4.0)
	E_Midlands	8361 (3.0)	7480 (2.7)	8454 (3.1)	5381 (2.6)	1691 (2.4)		991 (4.5)	875 (4.0)	695 (3.2)	413 (2.3)	89 (2.2)		4929 (7.0)	3766 (5.4)	2162 (3.1)	1057 (2.4)	676 (2.6)		1110 (4.5)	1272 (5.1)	569 (2.3)	412 (2.4)	158 (2.1)		4606 (2.8)	3928 (2.4)	6049 (3.6)	1512 (2.4)	2532 (2.4)		816 (5.5)	558 (3.8)	561 (3.8)	172 (2.3)	158 (2.2)		1789 (5.2)	1283 (3.7)	1126 (3.3)	211 (2.1)	641 (2.6)		631 (3.8)	746 (4.4)	407 (2.4)	112 (1.9)	246 (2.3)
	NE	5694 (2.1)	7695 (2.8)	3558 (1.3)	8277 (4.0)	3238 (4.6)		734 (3.4)	479 (2.2)	197 (0.9)	507 (2.8)	84 (2.1)		765 (1.1)	608 (0.9)	917 (1.3)	1473 (3.4)	982 (3.8)		811 (3.3)	553 (2.2)	486 (2.0)	668 (3.9)	263 (3.5)		3485 (2.1)	8544 (5.1)	1377 (0.8)	3469 (5.5)	6387 (6.2)		561 (3.8)	309 (2.1)	91 (0.6)	309 (4.1)	227 (3.1)		809 (2.4)	331 (1.0)	617 (1.8)	469 (4.8)	1181 (4.8)		770 (4.6)	327 (1.9)	312 (1.9)	297 (5.1)	560 (5.1)
	NI	5 (0.0)	316 (0.1)	0 (0.0)	543 (0.3)	186 (0.3)		0 (0.0)	0 (0.0)	1 (0.0)	41 (0.2)	10 (0.2)		0 (0.0)	0 (0.0)	0 (0.0)	179 (0.4)	104 (0.4)		0 (0.0)	0 (0.0)	0 (0.0)	55 (0.3)	29 (0.4)		0 (0.0)	215 (0.1)	0 (0.0)	236 (0.4)	352 (0.3)		0 (0.0)	0 (0.0)	0 (0.0)	26 (0.3)	20 (0.3)		0 (0.0)	0 (0.0)	0 (0.0)	47 (0.5)	130 (0.5)		0 (0.0)	0 (0.0)	0 (0.0)	17 (0.3)	55 (0.5)
	NW	37496 (13.6)	45255 (16.4)	43244 (15.7)	43323 (21.1)	16774 (23.8)		4158 (19.0)	3821 (17.5)	2841 (13.0)	3281 (18.4)	709 (17.4)		11717 (16.7)	10808 (15.4)	10251 (14.7)	9217 (21.0)	5642 (21.7)		5295 (21.4)	4875 (19.7)	3429 (13.9)	3441 (19.9)	1507 (20.2)		22436 (13.4)	32172 (19.3)	26969 (16.2)	15771 (24.9)	26566 (25.7)		2758 (18.7)	3092 (20.9)	1933 (13.1)	1669 (22.1)	1390 (19.2)		6429 (18.8)	6272 (18.3)	5765 (16.8)	2491 (25.3)	5765 (23.6)		3546 (21.1)	3784 (22.6)	2467 (14.7)	1348 (23.0)	2440 (22.3)
	Scentral	45184 (16.4)	38047 (13.8)	44247 (16.0)	23189 (11.3)	7129 (10.1)		4327 (19.8)	4205 (19.2)	3998 (18.3)	2387 (13.4)	545 (13.4)		17335 (24.8)	16734 (23.9)	11998 (17.1)	5288 (12.0)	3061 (11.8)		3721 (15.0)	4647 (18.8)	3697 (14.9)	1845 (10.7)	750 (10.1)		26708 (16.0)	18567 (11.1)	32444 (19.4)	5985 (9.5)	9551 (9.2)		2811 (19.0)	2721 (18.4)	3164 (21.4)	781 (10.3)	834 (11.5)		7229 (21.1)	6675 (19.5)	5821 (17.0)	896 (9.1)	2487 (10.2)		2414 (14.4)	3088 (18.4)	2778 (16.6)	536 (9.2)	979 (9.0)
	SE_coast	24384 (8.8)	24585 (8.9)	21725 (7.9)	16235 (7.9)	5060 (7.2)		607 (2.8)	1136 (5.2)	1974 (9.0)	1758 (9.9)	426 (10.5)		3972 (5.7)	4195 (6.0)	5844 (8.4)	3951 (9.0)	2088 (8.0)		276 (1.1)	886 (3.6)	1966 (7.9)	1447 (8.4)	595 (8.0)		15441 (9.3)	14528 (8.7)	13165 (7.9)	4949 (7.8)	7755 (7.5)		424 (2.9)	677 (4.6)	1222 (8.3)	756 (10.0)	745 (10.3)		1104 (3.2)	2020 (5.9)	2824 (8.2)	831 (8.4)	1979 (8.1)		53 (0.3)	626 (3.7)	1318 (7.9)	446 (7.6)	952 (8.7)
	SW	46656 (16.9)	41908 (15.2)	44971 (16.3)	25533 (12.4)	8269 (11.7)		3305 (15.1)	3542 (16.2)	4116 (18.8)	2672 (15.0)	656 (16.1)		11644 (16.6)	12328 (17.6)	11018 (15.7)	5352 (12.2)	3301 (12.7)		3253 (13.1)	3828 (15.5)	4487 (18.1)	2360 (13.6)	876 (11.8)		28275 (16.9)	24929 (14.9)	27086 (16.2)	7873 (12.4)	12399 (12.0)		2111 (14.3)	2440 (16.5)	2852 (19.3)	1097 (14.5)	1129 (15.6)		5382 (15.7)	6175 (18.0)	5216 (15.2)	1155 (11.7)	3097 (12.7)		2385 (14.2)	2860 (17.0)	2975 (17.7)	701 (12.0)	1420 (13.0)
	unknown	6256 (2.3)	6265 (2.3)	4540 (1.6)	4828 (2.4)	1523 (2.2)		400 (1.8)	347 (1.6)	306 (1.4)	294 (1.6)	75 (1.8)		1456 (2.1)	1450 (2.1)	1261 (1.8)	1194 (2.7)	678 (2.6)		558 (2.3)	485 (2.0)	412 (1.7)	463 (2.7)	189 (2.5)		3391 (2.0)	2299 (1.4)	2358 (1.4)	1161 (1.8)	1860 (1.8)		247 (1.7)	131 (0.9)	171 (1.2)	102 (1.4)	120 (1.7)		609 (1.8)	400 (1.2)	572 (1.7)	199 (2.0)	518 (2.1)		304 (1.8)	174 (1.0)	262 (1.6)	125 (2.1)	205 (1.9)
	W_Midlands	51142 (18.5)	48367 (17.5)	56223 (20.4)	37389 (18.2)	13122 (18.6)		1672 (7.6)	2855 (13.0)	4488 (20.5)	3260 (18.3)	723 (17.8)		5909 (8.4)	9133 (13.1)	12463 (17.8)	6815 (15.5)	4225 (16.2)		1231 (5.0)	2147 (8.7)	5048 (20.4)	3016 (17.4)	1429 (19.2)		32654 (19.6)	30081 (18.0)	30615 (18.3)	10697 (16.9)	17636 (17.0)		888 (6.0)	1678 (11.4)	2685 (18.2)	1274 (16.9)	1223 (16.9)		2504 (7.3)	5112 (14.9)	5969 (17.4)	1518 (15.4)	3849 (15.8)		819 (4.9)	1788 (10.7)	3320 (19.8)	1163 (19.9)	1939 (17.7)
	Yorkshire	8739 (3.2)	9645 (3.5)	6652 (2.4)	7830 (3.8)	2488 (3.5)		2574 (11.8)	1395 (6.4)	445 (2.0)	640 (3.6)	116 (2.9)		6145 (8.8)	3736 (5.3)	1826 (2.6)	1631 (3.7)	1088 (4.2)		3582 (14.5)	2254 (9.1)	600 (2.4)	619 (3.6)	275 (3.7)		5235 (3.1)	6261 (3.8)	5531 (3.3)	2686 (4.2)	4290 (4.1)		1875 (12.7)	1314 (8.9)	358 (2.4)	305 (4.0)	278 (3.8)		3948 (11.5)	1684 (4.9)	1317 (3.8)	464 (4.7)	1082 (4.4)		2610 (15.6)	1613 (9.6)	514 (3.1)	218 (3.7)	479 (4.4)
AF	0	263774 (95.6)	260289 (94.4)	259947 (94.2)	193053 (94.0)	64510 (91.5)	<0.001	20031 (91.5)	19556 (89.3)	19567 (89.4)	15841 (88.9)	3526 (86.7)	<0.001	68038 (97.2)	67564 (96.6)	67824 (96.9)	42487 (96.7)	24984 (95.9)	<0.001	23765 (96.0)	23412 (94.6)	23428 (94.7)	16300 (94.2)	6904 (92.7)	<0.001	154915 (92.8)	149415 (89.6)	151638 (90.9)	56198 (88.8)	90475 (87.4)	<0.001	13295 (90.0)	12685 (85.9)	12915 (87.4)	6412 (85.0)	5991 (82.9)	<0.001	32149 (93.8)	31150 (90.9)	31830 (92.9)	8962 (91.0)	22171 (90.8)	<0.001	15672 (93.4)	15133 (90.2)	15350 (91.5)	5253 (89.8)	9780 (89.5)	<0.001
	1	189436 (68.7)	199202 (72.2)	215058 (78.0)	161396 (78.6)	54329 (77.0)		15786 (72.1)	15445 (70.6)	16954 (77.5)	13901 (78.0)	3084 (75.9)		49476 (70.7)	51800 (74.0)	53323 (76.2)	34034 (77.5)	19835 (76.1)		17732 (71.7)	18103 (73.2)	18389 (74.3)	13131 (75.9)	5445 (73.1)		117813 (70.6)	122841 (73.6)	128606 (77.1)	49252 (77.8)	80097 (77.4)		10820 (73.3)	10931 (74.0)	11461 (77.6)	5902 (78.2)	5584 (77.3)		25408 (74.1)	25546 (74.5)	26273 (76.7)	7612 (77.3)	18891 (77.3)		12553 (74.8)	12844 (76.6)	12437 (74.1)	4456 (76.2)	8181 (74.9)
allergic_rhinitis	0	252802 (91.7)	215549 (78.1)	241435 (87.5)	145448 (70.8)	54835 (77.7)	<0.001	19661 (89.8)	17066 (78.0)	19403 (88.7)	12967 (72.8)	3233 (79.5)	<0.001	62537 (89.4)	50049 (71.5)	61509 (87.9)	30722 (69.9)	19406 (74.5)	<0.001	22150 (89.5)	18373 (74.2)	21966 (88.8)	12590 (72.8)	6000 (80.6)	<0.001	150931 (90.5)	148952 (89.3)	143185 (85.8)	53260 (84.1)	87327 (84.4)	<0.001	12956 (87.7)	12797 (86.6)	12738 (86.2)	6291 (83.4)	6090 (84.3)	<0.001	30078 (87.8)	29521 (86.1)	29592 (86.3)	8419 (85.5)	20924 (85.7)	<0.001	14717 (87.7)	14391 (85.8)	14570 (86.9)	4984 (85.2)	9564 (87.5)	<0.001
	1	189436 (68.7)	199202 (72.2)	215058 (78.0)	161396 (78.6)	54329 (77.0)		15786 (72.1)	15445 (70.6)	16954 (77.5)	13901 (78.0)	3084 (75.9)		49476 (70.7)	51800 (74.0)	53323 (76.2)	34034 (77.5)	19835 (76.1)		17732 (71.7)	18103 (73.2)	18389 (74.3)	13131 (75.9)	5445 (73.1)		117813 (70.6)	122841 (73.6)	128606 (77.1)	49252 (77.8)	80097 (77.4)		10820 (73.3)	10931 (74.0)	11461 (77.6)	5902 (78.2)	5584 (77.3)		25408 (74.1)	25546 (74.5)	26273 (76.7)	7612 (77.3)	18891 (77.3)		12553 (74.8)	12844 (76.6)	12437 (74.1)	4456 (76.2)	8181 (74.9)
atopic_dermatitis	0	264725 (96.0)	258015 (93.5)	260643 (94.5)	187403 (91.3)	65087 (92.3)	<0.001	20790 (95.0)	20432 (93.4)	20625 (94.2)	16236 (91.1)	3721 (91.5)	<0.001	66989 (95.7)	64720 (92.5)	64187 (91.7)	37908 (86.3)	23498 (90.2)	<0.001	23555 (95.2)	22856 (92.4)	23505 (95.0)	15835 (91.5)	6916 (92.9)	<0.001	159716 (95.7)	157959 (94.7)	157124 (94.2)	58918 (93.0)	96085 (92.8)	<0.001	13887 (94.0)	13823 (93.6)	13879 (94.0)	6958 (92.2)	6672 (92.3)	<0.001	32646 (95.2)	32235 (94.0)	31035 (90.5)	8652 (87.9)	22056 (90.3)	<0.001	15910 (94.8)	15703 (93.6)	15864 (94.6)	5447 (93.1)	10308 (94.3)	<0.001
	1	189436 (68.7)	199202 (72.2)	215058 (78.0)	161396 (78.6)	54329 (77.0)		15786 (72.1)	15445 (70.6)	16954 (77.5)	13901 (78.0)	3084 (75.9)		49476 (70.7)	51800 (74.0)	53323 (76.2)	34034 (77.5)	19835 (76.1)		17732 (71.7)	18103 (73.2)	18389 (74.3)	13131 (75.9)	5445 (73.1)		117813 (70.6)	122841 (73.6)	128606 (77.1)	49252 (77.8)	80097 (77.4)		10820 (73.3)	10931 (74.0)	11461 (77.6)	5902 (78.2)	5584 (77.3)		25408 (74.1)	25546 (74.5)	26273 (76.7)	7612 (77.3)	18891 (77.3)		12553 (74.8)	12844 (76.6)	12437 (74.1)	4456 (76.2)	8181 (74.9)
coronary_heart	0	253807 (92.0)	244704 (88.7)	246383 (89.3)	178492 (86.9)	57159 (81.0)	<0.001	18817 (86.0)	17874 (81.7)	18373 (83.9)	14319 (80.3)	3098 (76.2)	<0.001	66167 (94.6)	64854 (92.7)	65320 (93.4)	40399 (92.0)	23462 (90.1)	<0.001	22787 (92.1)	22011 (88.9)	22323 (90.2)	15114 (87.4)	6221 (83.5)	<0.001	146611 (87.9)	133066 (79.8)	140777 (84.4)	47752 (75.4)	77356 (74.7)	<0.001	12287 (83.2)	11271 (76.3)	11989 (81.2)	5538 (73.4)	5283 (73.1)	<0.001	30250 (88.3)	27858 (81.3)	29559 (86.2)	7611 (77.3)	19482 (79.7)	<0.001	14587 (87.0)	13471 (80.3)	14359 (85.6)	4548 (77.8)	8487 (77.7)	<0.001
	1	189436 (68.7)	199202 (72.2)	215058 (78.0)	161396 (78.6)	54329 (77.0)		15786 (72.1)	15445 (70.6)	16954 (77.5)	13901 (78.0)	3084 (75.9)		49476 (70.7)	51800 (74.0)	53323 (76.2)	34034 (77.5)	19835 (76.1)		17732 (71.7)	18103 (73.2)	18389 (74.3)	13131 (75.9)	5445 (73.1)		117813 (70.6)	122841 (73.6)	128606 (77.1)	49252 (77.8)	80097 (77.4)		10820 (73.3)	10931 (74.0)	11461 (77.6)	5902 (78.2)	5584 (77.3)		25408 (74.1)	25546 (74.5)	26273 (76.7)	7612 (77.3)	18891 (77.3)		12553 (74.8)	12844 (76.6)	12437 (74.1)	4456 (76.2)	8181 (74.9)
diabetes_type_2	0	251316 (91.1)	244304 (88.6)	243963 (88.4)	175558 (85.5)	58799 (83.4)	<0.001	19132 (87.4)	18532 (84.7)	18877 (86.2)	14880 (83.5)	3416 (84.0)	<0.001	65503 (93.6)	64045 (91.5)	64174 (91.7)	39120 (89.1)	23160 (88.9)	<0.001	22619 (91.4)	21909 (88.5)	22245 (89.9)	14882 (86.0)	6397 (85.9)	<0.001	146252 (87.7)	143859 (86.2)	142348 (85.3)	52250 (82.5)	85139 (82.2)	<0.001	12722 (86.1)	12515 (84.7)	12551 (85.0)	6234 (82.6)	5963 (82.5)	<0.001	30240 (88.2)	29655 (86.5)	29326 (85.6)	8041 (81.7)	20523 (84.0)	<0.001	14663 (87.4)	14416 (85.9)	14403 (85.9)	4877 (83.4)	9366 (85.7)	<0.001
	1	189436 (68.7)	199202 (72.2)	215058 (78.0)	161396 (78.6)	54329 (77.0)		15786 (72.1)	15445 (70.6)	16954 (77.5)	13901 (78.0)	3084 (75.9)		49476 (70.7)	51800 (74.0)	53323 (76.2)	34034 (77.5)	19835 (76.1)		17732 (71.7)	18103 (73.2)	18389 (74.3)	13131 (75.9)	5445 (73.1)		117813 (70.6)	122841 (73.6)	128606 (77.1)	49252 (77.8)	80097 (77.4)		10820 (73.3)	10931 (74.0)	11461 (77.6)	5902 (78.2)	5584 (77.3)		25408 (74.1)	25546 (74.5)	26273 (76.7)	7612 (77.3)	18891 (77.3)		12553 (74.8)	12844 (76.6)	12437 (74.1)	4456 (76.2)	8181 (74.9)
HF	0	270522 (98.1)	266468 (96.6)	268142 (97.2)	197849 (96.4)	66277 (94.0)	<0.001	20899 (95.5)	20441 (93.4)	20859 (95.3)	16694 (93.7)	3663 (90.1)	<0.001	69062 (98.7)	68479 (97.9)	68888 (98.5)	42938 (97.8)	25307 (97.2)	<0.001	24205 (97.8)	23916 (96.6)	24059 (97.2)	16620 (96.1)	7041 (94.6)	<0.001	161887 (97.0)	153990 (92.3)	159846 (95.8)	57610 (91.0)	93535 (90.3)	<0.001	14024 (94.9)	13184 (89.3)	13950 (94.4)	6731 (89.2)	6336 (87.7)	<0.001	33233 (97.0)	31912 (93.1)	33181 (96.8)	9024 (91.6)	22713 (93.0)	<0.001	16218 (96.7)	15485 (92.3)	16081 (95.9)	5346 (91.4)	9924 (90.8)	<0.001
	1	189436 (68.7)	199202 (72.2)	215058 (78.0)	161396 (78.6)	54329 (77.0)		15786 (72.1)	15445 (70.6)	16954 (77.5)	13901 (78.0)	3084 (75.9)		49476 (70.7)	51800 (74.0)	53323 (76.2)	34034 (77.5)	19835 (76.1)		17732 (71.7)	18103 (73.2)	18389 (74.3)	13131 (75.9)	5445 (73.1)		117813 (70.6)	122841 (73.6)	128606 (77.1)	49252 (77.8)	80097 (77.4)		10820 (73.3)	10931 (74.0)	11461 (77.6)	5902 (78.2)	5584 (77.3)		25408 (74.1)	25546 (74.5)	26273 (76.7)	7612 (77.3)	18891 (77.3)		12553 (74.8)	12844 (76.6)	12437 (74.1)	4456 (76.2)	8181 (74.9)
hyperthyroid	0	272002 (98.6)	271145 (98.3)	270915 (98.2)	201197 (98.0)	68991 (97.8)	<0.001	21510 (98.3)	21392 (97.7)	21389 (97.7)	17354 (97.4)	3953 (97.2)	<0.001	69112 (98.8)	68992 (98.6)	69053 (98.7)	43328 (98.6)	25658 (98.5)	0.007	24323 (98.3)	24258 (98.0)	24197 (97.8)	16890 (97.6)	7270 (97.6)	<0.001	164597 (98.7)	163046 (97.7)	163998 (98.3)	61764 (97.5)	100907 (97.5)	<0.001	14519 (98.3)	14390 (97.4)	14466 (97.9)	7299 (96.7)	6985 (96.7)	<0.001	33819 (98.7)	33535 (97.8)	33751 (98.5)	9635 (97.8)	23917 (97.9)	<0.001	16511 (98.4)	16371 (97.6)	16422 (97.9)	5686 (97.2)	10626 (97.2)	<0.001
	1	189436 (68.7)	199202 (72.2)	215058 (78.0)	161396 (78.6)	54329 (77.0)		15786 (72.1)	15445 (70.6)	16954 (77.5)	13901 (78.0)	3084 (75.9)		49476 (70.7)	51800 (74.0)	53323 (76.2)	34034 (77.5)	19835 (76.1)		17732 (71.7)	18103 (73.2)	18389 (74.3)	13131 (75.9)	5445 (73.1)		117813 (70.6)	122841 (73.6)	128606 (77.1)	49252 (77.8)	80097 (77.4)		10820 (73.3)	10931 (74.0)	11461 (77.6)	5902 (78.2)	5584 (77.3)		25408 (74.1)	25546 (74.5)	26273 (76.7)	7612 (77.3)	18891 (77.3)		12553 (74.8)	12844 (76.6)	12437 (74.1)	4456 (76.2)	8181 (74.9)
hypothyroid	0	259339 (94.0)	254658 (92.3)	254444 (92.2)	186954 (91.1)	63394 (89.9)	<0.001	20033 (91.5)	19606 (89.6)	19320 (88.3)	15410 (86.5)	3490 (85.9)	<0.001	66851 (95.5)	65885 (94.2)	65938 (94.2)	41001 (93.4)	24256 (93.1)	<0.001	23088 (93.3)	22680 (91.6)	22432 (90.6)	15415 (89.1)	6599 (88.6)	<0.001	156037 (93.5)	154121 (92.4)	153227 (91.8)	57601 (91.0)	93850 (90.7)	<0.001	13527 (91.6)	13308 (90.1)	13095 (88.7)	6687 (88.6)	6230 (86.2)	<0.001	32178 (93.9)	31832 (92.9)	31644 (92.3)	9008 (91.5)	22499 (92.1)	<0.001	15529 (92.6)	15394 (91.8)	15197 (90.6)	5289 (90.4)	9838 (90.0)	<0.001
	1	189436 (68.7)	199202 (72.2)	215058 (78.0)	161396 (78.6)	54329 (77.0)		15786 (72.1)	15445 (70.6)	16954 (77.5)	13901 (78.0)	3084 (75.9)		49476 (70.7)	51800 (74.0)	53323 (76.2)	34034 (77.5)	19835 (76.1)		17732 (71.7)	18103 (73.2)	18389 (74.3)	13131 (75.9)	5445 (73.1)		117813 (70.6)	122841 (73.6)	128606 (77.1)	49252 (77.8)	80097 (77.4)		10820 (73.3)	10931 (74.0)	11461 (77.6)	5902 (78.2)	5584 (77.3)		25408 (74.1)	25546 (74.5)	26273 (76.7)	7612 (77.3)	18891 (77.3)		12553 (74.8)	12844 (76.6)	12437 (74.1)	4456 (76.2)	8181 (74.9)
hypertension	0	188229 (68.2)	174191 (63.2)	165147 (59.9)	117980 (57.5)	34317 (48.6)	<0.001	11192 (51.1)	10520 (48.1)	10389 (47.5)	7946 (44.6)	1618 (39.8)	<0.001	54392 (77.7)	51971 (74.3)	52248 (74.7)	31656 (72.1)	17874 (68.6)	<0.001	16763 (67.7)	15774 (63.7)	15843 (64.0)	10512 (60.8)	4028 (54.1)	<0.001	97031 (58.2)	90314 (54.1)	82664 (49.5)	30931 (48.8)	47699 (46.1)	<0.001	6992 (47.3)	6798 (46.0)	6466 (43.8)	3324 (44.0)	2950 (40.8)	<0.001	20485 (59.8)	19525 (57.0)	19111 (55.8)	5084 (51.6)	13147 (53.8)	<0.001	9401 (56.0)	8985 (53.6)	8963 (53.4)	3198 (54.7)	5655 (51.8)	<0.001
	1	189436 (68.7)	199202 (72.2)	215058 (78.0)	161396 (78.6)	54329 (77.0)		15786 (72.1)	15445 (70.6)	16954 (77.5)	13901 (78.0)	3084 (75.9)		49476 (70.7)	51800 (74.0)	53323 (76.2)	34034 (77.5)	19835 (76.1)		17732 (71.7)	18103 (73.2)	18389 (74.3)	13131 (75.9)	5445 (73.1)		117813 (70.6)	122841 (73.6)	128606 (77.1)	49252 (77.8)	80097 (77.4)		10820 (73.3)	10931 (74.0)	11461 (77.6)	5902 (78.2)	5584 (77.3)		25408 (74.1)	25546 (74.5)	26273 (76.7)	7612 (77.3)	18891 (77.3)		12553 (74.8)	12844 (76.6)	12437 (74.1)	4456 (76.2)	8181 (74.9)
obesity	0	260622 (94.5)	251158 (91.1)	243007 (88.1)	167078 (81.4)	56882 (80.6)	<0.001	19995 (91.4)	19168 (87.6)	19860 (90.7)	15121 (84.8)	3480 (85.6)	<0.001	65382 (93.4)	62452 (89.3)	63964 (91.4)	37431 (85.2)	22259 (85.5)	<0.001	22776 (92.0)	21584 (87.2)	22511 (91.0)	14464 (83.6)	6314 (84.8)	<0.001	157292 (94.3)	154243 (92.4)	148616 (89.1)	53608 (84.7)	87343 (84.4)	<0.001	13522 (91.5)	13256 (89.7)	13412 (90.8)	6565 (87.0)	6362 (88.1)	<0.001	31361 (91.5)	30650 (89.4)	30892 (90.1)	8364 (84.9)	21226 (86.9)	<0.001	15152 (90.3)	14884 (88.7)	15203 (90.6)	5104 (87.3)	9645 (88.3)	<0.001
	1	189436 (68.7)	199202 (72.2)	215058 (78.0)	161396 (78.6)	54329 (77.0)		15786 (72.1)	15445 (70.6)	16954 (77.5)	13901 (78.0)	3084 (75.9)		49476 (70.7)	51800 (74.0)	53323 (76.2)	34034 (77.5)	19835 (76.1)		17732 (71.7)	18103 (73.2)	18389 (74.3)	13131 (75.9)	5445 (73.1)		117813 (70.6)	122841 (73.6)	128606 (77.1)	49252 (77.8)	80097 (77.4)		10820 (73.3)	10931 (74.0)	11461 (77.6)	5902 (78.2)	5584 (77.3)		25408 (74.1)	25546 (74.5)	26273 (76.7)	7612 (77.3)	18891 (77.3)		12553 (74.8)	12844 (76.6)	12437 (74.1)	4456 (76.2)	8181 (74.9)
asthma	0	NA	NA	NA	NA	NA	NA	NA	NA	NA	NA	NA	NA	NA	NA	NA	NA	NA	NA	NA	NA	NA	NA	NA	NA	153203 (91.8)	123009 (73.7)	147712 (88.5)	38510 (60.8)	72228 (69.8)	<0.001	13305 (90.1)	10735 (72.7)	12978 (87.9)	4597 (60.9)	5043 (69.8)	<0.001	30836 (90.0)	24137 (70.4)	30526 (89.1)	6241 (63.4)	17517 (71.7)	<0.001	15014 (89.5)	11901 (70.9)	14715 (87.7)	3664 (62.6)	7700 (70.5)	<0.001
	1	NA	NA	NA	NA	NA	NA	NA	NA	NA	NA	NA	NA	NA	NA	NA	NA	NA	NA	NA	NA	NA	NA	NA	NA	117813 (70.6)	122841 (73.6)	128606 (77.1)	49252 (77.8)	80097 (77.4)		10820 (73.3)	10931 (74.0)	11461 (77.6)	5902 (78.2)	5584 (77.3)		25408 (74.1)	25546 (74.5)	26273 (76.7)	7612 (77.3)	18891 (77.3)		12553 (74.8)	12844 (76.6)	12437 (74.1)	4456 (76.2)	8181 (74.9)

## Sheet: S6 
id.exposure	id.outcome	outcome	exposure	method	nsnp	b	se	pval	Fstat	Q	Q_df	Q_pval	pval_bh	consider for MR?	observation_mapping
COPD	AF	AF	COPD	Inverse variance weighted	43	0.0328385	0.0236089	0.164244	39.0811	39.8988	42	0.563588	0.191618	FALSE	AF
COPD	Alcohol	Alcohol	COPD	Inverse variance weighted	40	-0.00025422	0.0099196	0.979554	38.5109	NA	NA	NA	0.979554	FALSE	alcohol_consumption_level
COPD	BMI	BMI	COPD	Inverse variance weighted	44	0.120944	0.0262898	4.21664094993631e-06	39.0811	NA	NA	NA	8.04995090442387e-06	TRUE	bmi_category
COPD	Education	Education	COPD	Inverse variance weighted	30	-0.0663852	0.0115841	9.99929242249546e-09	37.5607	NA	NA	NA	3.49975234787341e-08	TRUE	imd_quintile
COPD	HF	HF	COPD	Inverse variance weighted	44	0.151453	0.0317624	1.85776099647377e-06	39.0811	79.3977	43	0.000609382	3.90129809259491e-06	TRUE	HF
COPD	Lipids-HDL	Lipids-HDL	COPD	Inverse variance weighted	28	-0.038851	0.00749509	2.17729728019458e-07	39.4957	NA	NA	NA	5.08036032045403e-07	TRUE	HDL_category
COPD	Lipids-LDL	Lipids-LDL	COPD	Inverse variance weighted	28	-0.00938641	0.00796982	0.238899	38.0819	NA	NA	NA	0.264046	FALSE	LDL_category
COPD	Lipids-Trig	Lipids-Trig	COPD	Inverse variance weighted	17	0.00668489	0.0102904	0.515935	41.0407	NA	NA	NA	0.541732	FALSE	triglyceride_category
COPD	PA	PA	COPD	Inverse variance weighted	43	-0.0283251	0.0174733	0.105007	39.19	NA	NA	NA	0.137821	FALSE	pa_level
COPD	SBP	SBP	COPD	Inverse variance weighted	25	0.464256	0.177741	0.00900206	41.4776	NA	NA	NA	0.0135031	TRUE	sbp_category
COPD	Smoking-Ever	Smoking-Ever	COPD	Inverse variance weighted	33	0.0691854	0.0107689	1.3224617697715e-10	36.8151	NA	NA	NA	5.55433943304028e-10	TRUE	smoking_status_final
COPD	Smoking-Num	Smoking-Num	COPD	Inverse variance weighted	34	0.0771195	0.0141435	4.96217055735853e-08	34.4656	NA	NA	NA	1.30256977130661e-07	TRUE	smoking_status_final
COPD	WHR	WHR	COPD	Inverse variance weighted	29	0.0827869	0.0149133	2.83667976140007e-08	38.0119	NA	NA	NA	8.5100392842002e-08	TRUE	WHR
COPD	allergic_rhinitis	allergic_rhinitis	COPD	Inverse variance weighted	43	0.0575832	0.0299216	0.054296	39.0811	49.0754	42	0.21061	0.0760144	FALSE	allergic_rhinitis
COPD	asthma	asthma	COPD	Inverse variance weighted	39	0.343353	0.0332264	4.95795753586944e-25	39.0811	97.2667	38	4.27054397617038e-07	1.04117108253258e-23	TRUE	asthma
COPD	coronary_heart	coronary_heart	COPD	Inverse variance weighted	38	0.146136	0.0223101	5.74573777159548e-11	39.0811	65.277	37	0.00280201	3.01651233008763e-10	TRUE	coronary_heart
COPD	diabetes_type_2	diabetes_type_2	COPD	Inverse variance weighted	33	0.128498	0.0334417	0.000121814	39.0811	85.2283	32	1.00106521816516e-06	0.000213174	TRUE	diabetes_type_2
COPD	hypertension	hypertension	COPD	Inverse variance weighted	26	0.15836	0.0236591	2.17997838846043e-11	39.0811	41.4307	25	0.020674	1.5259848719223e-10	TRUE	hypertension
COPD	hyperthyroid	hyperthyroid	COPD	Inverse variance weighted	43	0.079487	0.0517416	0.124482	39.0811	55.3947	42	0.0806204	0.153772	FALSE	hyperthyroid
COPD	hypothyroid	hypothyroid	COPD	Inverse variance weighted	33	0.0839181	0.0316571	0.00802895	39.0811	53.1487	32	0.010832	0.0129698	TRUE	hypothyroid
COPD	obesity	obesity	COPD	Inverse variance weighted	43	0.26734	0.0380475	2.11812146429665e-12	39.0811	133.74	42	1.69005865249651e-11	2.22402753751149e-11	TRUE	obesity
OA	AF	AF	OA	Inverse variance weighted	124	0.166501	0.0420783	7.59200406158006e-05	39.2565	276.922	123	7.09283135695289e-14	0.000159432	TRUE	AF
OA	Alcohol	Alcohol	OA	Inverse variance weighted	104	0.0147979	0.0104749	0.157742	39.3655	NA	NA	NA	0.157742	FALSE	alcohol_consumption_level
OA	BMI	BMI	OA	Inverse variance weighted	126	0.25147	0.0307491	2.88239183001306e-16	39.1893	NA	NA	NA	3.02651142151371e-15	TRUE	bmi_category
OA	Education	Education	OA	Inverse variance weighted	99	-0.0829618	0.0136434	1.19640257905981e-09	39.1196	NA	NA	NA	3.58920773717942e-09	TRUE	imd_quintile
OA	HF	HF	OA	Inverse variance weighted	128	0.205102	0.0335756	1.00465090751091e-09	39.1302	208.289	127	7.24982229733415e-06	3.51627817628818e-09	TRUE	HF
OA	Lipids-HDL	Lipids-HDL	OA	Inverse variance weighted	96	-0.0345	0.0101753	0.000697482	38.035	NA	NA	NA	0.00104622	TRUE	HDL_category
OA	Lipids-LDL	Lipids-LDL	OA	Inverse variance weighted	91	-0.0241875	0.0104005	0.0200391	38.3346	NA	NA	NA	0.0247541	TRUE	LDL_category
OA	Lipids-Trig	Lipids-Trig	OA	Inverse variance weighted	96	0.0434824	0.0108746	6.37356784881113e-05	38.5503	NA	NA	NA	0.000148717	TRUE	triglyceride_category
OA	PA	PA	OA	Inverse variance weighted	126	-0.0593062	0.0189474	0.00174785	38.7233	NA	NA	NA	0.00244699	TRUE	pa_level
OA	SBP	SBP	OA	Inverse variance weighted	80	-0.378477	0.260964	0.146974	38.5308	NA	NA	NA	0.154323	FALSE	sbp_category
OA	Smoking-Ever	Smoking-Ever	OA	Inverse variance weighted	98	0.0598673	0.0101739	3.99559546413394e-09	39.5613	NA	NA	NA	1.04884380933516e-08	TRUE	smoking_status_final
OA	Smoking-Num	Smoking-Num	OA	Inverse variance weighted	106	0.0226672	0.0153004	0.13848	39.7551	NA	NA	NA	0.153056	FALSE	smoking_status_final
OA	WHR	WHR	OA	Inverse variance weighted	93	0.0942092	0.0148005	1.9494474026562e-10	37.2763	NA	NA	NA	1.02345988639451e-09	TRUE	WHR
OA	allergic_rhinitis	allergic_rhinitis	OA	Inverse variance weighted	129	0.133671	0.0352349	0.000148405	39.1302	176.77	128	0.00280464	0.000239731	TRUE	allergic_rhinitis
OA	asthma	asthma	OA	Inverse variance weighted	127	0.212188	0.0342768	5.99950562625528e-10	39.1302	297.638	126	6.40215570222119e-16	2.51979236302722e-09	TRUE	asthma
OA	coronary_heart	coronary_heart	OA	Inverse variance weighted	115	0.100336	0.0257761	9.91740288858589e-05	39.1302	197.081	114	2.22709510023514e-06	0.000189332	TRUE	coronary_heart
OA	diabetes_type_2	diabetes_type_2	OA	Inverse variance weighted	106	0.11177	0.0400017	0.00520398	39.2565	318.373	105	2.42459522621618e-23	0.00683022	TRUE	diabetes_type_2
OA	hypertension	hypertension	OA	Inverse variance weighted	96	0.251356	0.0330363	2.77334996613435e-14	39.1302	283.4	95	1.242438995606e-20	1.94134497629405e-13	TRUE	hypertension
OA	hyperthyroid	hyperthyroid	OA	Inverse variance weighted	128	0.130791	0.0579947	0.0241191	39.1302	162.268	127	0.0189054	0.0281389	TRUE	hyperthyroid
OA	hypothyroid	hypothyroid	OA	Inverse variance weighted	119	0.126865	0.0332949	0.000138772	39.1302	201.776	118	2.48673898239089e-06	0.000239731	TRUE	hypothyroid
OA	obesity	obesity	OA	Inverse variance weighted	126	0.471595	0.039675	1.39188986870328e-32	39.1302	310.217	125	9.48234325974569e-18	2.92296872427688e-31	TRUE	obesity
PMR	AF	AF	PMR	Inverse variance weighted	7	-0.0277594	0.0223786	0.21481	141.91	11.4304	6	0.0759512	0.467942	FALSE	AF
PMR	BMI	BMI	PMR	Inverse variance weighted	9	0.00651515	0.00675693	0.334937	133.824	NA	NA	NA	0.483269	FALSE	bmi_category
PMR	Education	Education	PMR	Inverse variance weighted	2	-0.0310216	0.0114406	0.00669736	54.824	NA	NA	NA	0.0357193	TRUE	imd_quintile
PMR	HF	HF	PMR	Inverse variance weighted	7	0.0243265	0.0231415	0.293164	141.91	13.6125	6	0.0342779	0.476242	FALSE	HF
PMR	Lipids-HDL	Lipids-HDL	PMR	Inverse variance weighted	7	-0.00905634	0.00605116	0.13449	74.5487	NA	NA	NA	0.35864	FALSE	HDL_category
PMR	Lipids-LDL	Lipids-LDL	PMR	Inverse variance weighted	6	0.00232126	0.00688994	0.736188	42.7787	NA	NA	NA	0.906078	FALSE	LDL_category
PMR	Lipids-Trig	Lipids-Trig	PMR	Inverse variance weighted	7	-0.000856377	0.00491108	0.86157	74.5487	NA	NA	NA	0.975889	FALSE	triglyceride_category
PMR	PA	PA	PMR	Inverse variance weighted	9	-0.00972671	0.00817238	0.233971	141.353	NA	NA	NA	0.467942	FALSE	pa_level
PMR	allergic_rhinitis	allergic_rhinitis	PMR	Inverse variance weighted	10	-0.0175002	0.0168032	0.297651	130.9	10.9586	9	0.278559	0.476242	FALSE	allergic_rhinitis
PMR	asthma	asthma	PMR	Inverse variance weighted	8	0.0426751	0.0278703	0.125719	157.265	9.70119	7	0.206148	0.35864	FALSE	asthma
PMR	coronary_heart	coronary_heart	PMR	Inverse variance weighted	7	0.0223893	0.0086989	0.0100585	157.265	6.68387	6	0.351074	0.0402338	TRUE	coronary_heart
PMR	diabetes_type_2	diabetes_type_2	PMR	Inverse variance weighted	5	-0.000366239	0.0125919	0.976797	141.91	2.58848	4	0.628865	0.976797	FALSE	diabetes_type_2
PMR	hypertension	hypertension	PMR	Inverse variance weighted	9	0.0397694	0.00990453	5.93754544999231e-05	130.9	16.8496	8	0.0317137	0.000475004	TRUE	hypertension
PMR	hyperthyroid	hyperthyroid	PMR	Inverse variance weighted	8	-0.00541208	0.0506442	0.914896	130.9	14.4227	7	0.0441538	0.975889	FALSE	hyperthyroid
PMR	hypothyroid	hypothyroid	PMR	Inverse variance weighted	7	0.153808	0.0196832	5.53321542073174e-15	130.9	10.8105	6	0.0944112	8.85314467317079e-14	TRUE	hypothyroid
PMR	obesity	obesity	PMR	Inverse variance weighted	10	0.014913	0.0163753	0.362452	130.9	17.2673	9	0.0446903	0.483269	FALSE	obesity
RA	AF	AF	RA	Inverse variance weighted	57	0.0252187	0.0141718	0.0751584	74.2083	75.2945	56	0.0437012	0.112738	FALSE	AF
RA	Alcohol	Alcohol	RA	Inverse variance weighted	53	-0.00877722	0.00356955	0.0139357	73.6823	NA	NA	NA	0.0243874	TRUE	alcohol_consumption_level
RA	BMI	BMI	RA	Inverse variance weighted	60	-0.0101699	0.00820577	0.215213	89.4602	NA	NA	NA	0.301298	FALSE	bmi_category
RA	Education	Education	RA	Inverse variance weighted	55	-0.0157714	0.00454586	0.000521613	75.6607	NA	NA	NA	0.0012171	TRUE	imd_quintile
RA	HF	HF	RA	Inverse variance weighted	54	0.0706396	0.0141588	6.06656760347284e-07	74.2083	77.858	53	0.014707	2.12329866121549e-06	TRUE	HF
RA	Lipids-HDL	Lipids-HDL	RA	Inverse variance weighted	42	-0.0206257	0.00455684	6.00242154615493e-06	65.0989	NA	NA	NA	1.80072646384648e-05	TRUE	HDL_category
RA	Lipids-LDL	Lipids-LDL	RA	Inverse variance weighted	50	-0.0124438	0.00361886	0.000584755	82.3372	NA	NA	NA	0.00122799	TRUE	LDL_category
RA	Lipids-Trig	Lipids-Trig	RA	Inverse variance weighted	51	0.00101443	0.0041283	0.805895	77.98	NA	NA	NA	0.84619	FALSE	triglyceride_category
RA	PA	PA	RA	Inverse variance weighted	61	-0.0166078	0.00620985	0.00748563	89.4602	NA	NA	NA	0.0142907	TRUE	pa_level
RA	SBP	SBP	RA	Inverse variance weighted	40	0.201119	0.0985594	0.041292	69.8395	NA	NA	NA	0.0667024	FALSE	sbp_category
RA	Smoking-Ever	Smoking-Ever	RA	Inverse variance weighted	54	0.00476771	0.00431803	0.269532	75.2338	NA	NA	NA	0.353761	FALSE	smoking_status_final
RA	Smoking-Num	Smoking-Num	RA	Inverse variance weighted	55	-0.00480358	0.00563265	0.393765	75.3607	NA	NA	NA	0.486416	FALSE	smoking_status_final
RA	WHR	WHR	RA	Inverse variance weighted	51	0.00419827	0.00541974	0.43856	69.9945	NA	NA	NA	0.511653	FALSE	WHR
RA	allergic_rhinitis	allergic_rhinitis	RA	Inverse variance weighted	55	0.010553	0.0160811	0.511673	89.9663	88.7178	54	0.00203009	0.565533	FALSE	allergic_rhinitis
RA	asthma	asthma	RA	Inverse variance weighted	49	0.110221	0.0165229	2.5439636676739e-11	87.1076	101.68	48	1.00195683769345e-05	1.78077456737173e-10	TRUE	asthma
RA	coronary_heart	coronary_heart	RA	Inverse variance weighted	50	0.0433905	0.0123668	0.000450425	87.0927	96.8982	49	5.45459319276021e-05	0.00118237	TRUE	coronary_heart
RA	diabetes_type_2	diabetes_type_2	RA	Inverse variance weighted	53	0.0650472	0.0119008	4.60859131346788e-08	74.2083	88.8215	52	0.00110984	2.02209278167631e-07	TRUE	diabetes_type_2
RA	hypertension	hypertension	RA	Inverse variance weighted	51	0.0797353	0.0106103	5.69513575038606e-14	89.9663	109.231	50	2.6614109845939e-06	5.97989253790537e-13	TRUE	hypertension
RA	hyperthyroid	hyperthyroid	RA	Inverse variance weighted	50	0.264331	0.0484298	4.81450662303884e-08	89.9663	109.272	49	1.72616280723754e-06	2.02209278167631e-07	TRUE	hyperthyroid
RA	hypothyroid	hypothyroid	RA	Inverse variance weighted	45	0.331479	0.0417994	2.18737781750495e-15	89.9663	232.256	44	2.02914284551411e-27	4.59349341676039e-14	TRUE	hypothyroid
RA	obesity	obesity	RA	Inverse variance weighted	58	0.000180032	0.014289	0.989947	89.9663	120.346	57	1.98316673657055e-06	0.989947	FALSE	obesity
asthma	AF	AF	asthma	Inverse variance weighted	157	0.0715889	0.0181185	7.77798107703029e-05	62.9624	274.547	156	1.45899362833375e-08	0.00019445	TRUE	AF
asthma	Alcohol	Alcohol	asthma	Inverse variance weighted	152	-0.00832382	0.00479417	0.0825218	64.2318	NA	NA	NA	0.11857	FALSE	alcohol_consumption_level
asthma	BMI	BMI	asthma	Inverse variance weighted	160	0.0225105	0.011515	0.0505958	62.9026	NA	NA	NA	0.0919923	FALSE	bmi_category
asthma	Education	Education	asthma	Inverse variance weighted	141	-0.0225104	0.00542392	3.3218990051837e-05	65.7669	NA	NA	NA	0.000132876	TRUE	imd_quintile
asthma	HF	HF	asthma	Inverse variance weighted	159	0.0606182	0.0157188	0.000115059	62.9624	215.946	158	0.00150901	0.000255687	TRUE	HF
asthma	Lipids-HDL	Lipids-HDL	asthma	Inverse variance weighted	120	-0.00363581	0.00539052	0.500005	61.79	NA	NA	NA	0.531168	FALSE	HDL_category
asthma	Lipids-LDL	Lipids-LDL	asthma	Inverse variance weighted	130	-0.00923979	0.00533525	0.0833027	60.6438	NA	NA	NA	0.11857	FALSE	LDL_category
asthma	Lipids-Trig	Lipids-Trig	asthma	Inverse variance weighted	119	-0.00874267	0.00513947	0.0889272	64.0855	NA	NA	NA	0.11857	FALSE	triglyceride_category
asthma	PA	PA	asthma	Inverse variance weighted	158	-0.0355498	0.00888758	6.33592432842517e-05	63.3434	NA	NA	NA	0.000181026	TRUE	pa_level
asthma	SBP	SBP	asthma	Inverse variance weighted	121	0.182702	0.110065	0.0969246	62.2968	NA	NA	NA	0.121156	FALSE	sbp_category
asthma	Smoking-Ever	Smoking-Ever	asthma	Inverse variance weighted	146	0.00200226	0.00464064	0.666132	65.467	NA	NA	NA	0.666132	FALSE	smoking_status_final
asthma	Smoking-Num	Smoking-Num	asthma	Inverse variance weighted	152	0.00992325	0.00565695	0.0794015	63.7859	NA	NA	NA	0.11857	FALSE	smoking_status_final
asthma	WHR	WHR	asthma	Inverse variance weighted	136	0.0138425	0.0061978	0.0255191	65.0807	NA	NA	NA	0.0510382	FALSE	WHR
asthma	allergic_rhinitis	allergic_rhinitis	asthma	Inverse variance weighted	160	0.511552	0.0222319	3.72175956653799e-117	62.9624	274.169	159	3.77131150080921e-08	7.44351913307598e-116	TRUE	allergic_rhinitis
asthma	coronary_heart	coronary_heart	asthma	Inverse variance weighted	151	0.0184024	0.0139141	0.185977	62.9624	289.156	150	6.98166754826439e-11	0.218797	FALSE	coronary_heart
asthma	diabetes_type_2	diabetes_type_2	asthma	Inverse variance weighted	144	0.0845736	0.0180049	2.63690372108524e-06	62.9624	368.936	143	6.88061551357705e-22	1.31845186054262e-05	TRUE	diabetes_type_2
asthma	hypertension	hypertension	asthma	Inverse variance weighted	144	0.0825285	0.0140634	4.40263865444971e-09	62.9624	359.631	143	1.21009371151695e-20	4.40263865444971e-08	TRUE	hypertension
asthma	hyperthyroid	hyperthyroid	asthma	Inverse variance weighted	154	0.0260794	0.0390847	0.50461	62.9624	244.369	153	3.76473349490512e-06	0.531168	FALSE	hyperthyroid
asthma	hypothyroid	hypothyroid	asthma	Inverse variance weighted	133	0.10319	0.0257053	5.96125120657992e-05	62.9624	350.97	132	8.82697402444661e-22	0.000181026	TRUE	hypothyroid
asthma	obesity	obesity	asthma	Inverse variance weighted	153	0.0918027	0.017967	3.23001721500858e-07	62.9624	304.111	152	3.22581152125489e-12	2.15334481000572e-06	TRUE	obesity
psoriasis	AF	AF	psoriasis	Inverse variance weighted	60	0.0359429	0.0118604	0.00244161	146.125	92.1142	59	0.00376529	0.00776026	TRUE	AF
psoriasis	Alcohol	Alcohol	psoriasis	Inverse variance weighted	58	-0.00440571	0.00293831	0.133769	153.006	NA	NA	NA	0.187277	FALSE	alcohol_consumption_level
psoriasis	BMI	BMI	psoriasis	Inverse variance weighted	65	0.00868194	0.00513173	0.0906809	143.892	NA	NA	NA	0.136021	FALSE	bmi_category
psoriasis	Education	Education	psoriasis	Inverse variance weighted	52	-0.0114754	0.00380862	0.00258675	116.26	NA	NA	NA	0.00776026	TRUE	imd_quintile
psoriasis	HF	HF	psoriasis	Inverse variance weighted	64	0.0468161	0.0112269	3.04603517737689e-05	145.124	82.3358	63	0.0515012	0.000213222	TRUE	HF
psoriasis	Lipids-HDL	Lipids-HDL	psoriasis	Inverse variance weighted	49	0.00266289	0.00272005	0.327586	149.931	NA	NA	NA	0.382184	FALSE	HDL_category
psoriasis	Lipids-LDL	Lipids-LDL	psoriasis	Inverse variance weighted	57	0.009998	0.00300177	0.000866288	135.734	NA	NA	NA	0.00363841	TRUE	LDL_category
psoriasis	Lipids-Trig	Lipids-Trig	psoriasis	Inverse variance weighted	56	0.00681951	0.00282283	0.0156987	159.543	NA	NA	NA	0.0329673	TRUE	triglyceride_category
psoriasis	PA	PA	psoriasis	Inverse variance weighted	64	-0.0163477	0.00561418	0.00359284	145.163	NA	NA	NA	0.0094312	TRUE	pa_level
psoriasis	SBP	SBP	psoriasis	Inverse variance weighted	37	0.097632	0.0672826	0.146759	147.69	NA	NA	NA	0.192621	FALSE	sbp_category
psoriasis	Smoking-Ever	Smoking-Ever	psoriasis	Inverse variance weighted	56	-0.00334025	0.0027894	0.231119	157.166	NA	NA	NA	0.2855	FALSE	smoking_status_final
psoriasis	Smoking-Num	Smoking-Num	psoriasis	Inverse variance weighted	56	-0.0034831	0.0046537	0.454184	156.993	NA	NA	NA	0.501993	FALSE	smoking_status_final
psoriasis	WHR	WHR	psoriasis	Inverse variance weighted	59	0.00667907	0.00325176	0.0399769	151.478	NA	NA	NA	0.0699595	FALSE	WHR
psoriasis	allergic_rhinitis	allergic_rhinitis	psoriasis	Inverse variance weighted	63	-0.00759422	0.0126935	0.549656	143.892	119.243	62	1.72164096132254e-05	0.577138	FALSE	allergic_rhinitis
psoriasis	asthma	asthma	psoriasis	Inverse variance weighted	54	0.0272743	0.0128948	0.034418	143.892	107.559	53	1.39817139127058e-05	0.0657071	FALSE	asthma
psoriasis	coronary_heart	coronary_heart	psoriasis	Inverse variance weighted	63	0.0163227	0.00872192	0.0612815	143.892	102.904	62	0.000850869	0.0989932	FALSE	coronary_heart
psoriasis	diabetes_type_2	diabetes_type_2	psoriasis	Inverse variance weighted	57	0.0385795	0.00827416	3.12164772340182e-06	146.125	85.0253	56	0.00743497	3.27773010957191e-05	TRUE	diabetes_type_2
psoriasis	hypertension	hypertension	psoriasis	Inverse variance weighted	57	-0.00302844	0.00836004	0.717164	143.892	114.266	56	7.12602941393037e-06	0.717164	FALSE	hypertension
psoriasis	hyperthyroid	hyperthyroid	psoriasis	Inverse variance weighted	62	-0.125455	0.0348579	0.000319381	143.892	160.954	61	5.98359167386965e-11	0.00167675	TRUE	hyperthyroid
psoriasis	hypothyroid	hypothyroid	psoriasis	Inverse variance weighted	50	0.0541034	0.0205116	0.00834709	143.892	136.884	49	3.04540678133684e-10	0.0194766	TRUE	hypothyroid
psoriasis	obesity	obesity	psoriasis	Inverse variance weighted	64	0.0572207	0.00825036	4.04659960497042e-12	143.892	74.671	63	0.149111	8.49785917043789e-11	TRUE	obesity

## Sheet: S7
pair tested	Outcome	confounder	crude OR	Crude se	Adjusted OR	Adjusted SE	Confounder effect %	fisher z score	fisher z p	significant
asthma&OA	OA	Imd Quintile	1.59718	0.00242093	1.59139	0.00242334	0.363908	-1.06045	0.28894	FALSE
asthma&OA	OA	LDL Category	1.59718	0.00242093	1.50364	0.00245749	6.22097	-17.4949	1.5679e-68	TRUE
asthma&OA	OA	HDL Category	1.59718	0.00242093	1.47711	0.00246178	8.12869	-22.6349	1.96517e-113	TRUE
asthma&OA	OA	Sbp Category	1.59718	0.00242093	1.4876	0.00244427	7.36574	-20.6586	8.16468e-95	TRUE
asthma&OA	OA	Dbp Category	1.59718	0.00242093	1.48896	0.00244264	7.26775	-20.4001	1.66957e-92	TRUE
asthma&OA	OA	Bmi Category	1.59718	0.00242093	1.38327	0.00247839	15.4635	-41.5012	0	TRUE
asthma&OA	OA	Totalcholesterol Category	1.59718	0.00242093	1.46892	0.0024611	8.73147	-24.2484	6.8764e-130	TRUE
asthma&OA	OA	Smoking Status Final	1.59718	0.00242093	1.46996	0.00245341	8.65442	-24.0813	3.92722e-128	TRUE
asthma&OA	OA	Pa Level	1.59718	0.00242093	1.52243	0.00244957	4.90994	-13.9175	4.96063e-44	TRUE
asthma&OA	OA	Triglyceride Category	1.59718	0.00242093	1.48996	0.00246053	7.19598	-20.1309	3.95386e-90	TRUE
asthma&OA	OA	Alcohol Consumption Level	1.59718	0.00242093	1.5187	0.00244594	5.16711	-14.6393	1.5762e-48	TRUE
asthma&OA	OA	Albumin Category	1.59718	0.00242093	1.45713	0.00245352	9.61148	-26.625	3.48739e-156	TRUE
asthma&OA	OA	Ethnicity 16cat	1.59718	0.00242093	1.49207	0.00243791	7.04456	-19.8138	2.26387e-87	TRUE
asthma&OA	OA	Region	1.59718	0.00242093	1.58446	0.00242669	0.802872	-2.33289	0.0196538	TRUE
asthma&OA	OA	AF	1.59718	0.00242093	1.58858	0.00242469	0.54126	-1.57543	0.115158	FALSE
asthma&OA	OA	Allergic Rhinitis	1.59718	0.00242093	1.46561	0.0024707	8.97677	-24.8518	2.47104e-136	TRUE
asthma&OA	OA	Atopic Dermatitis	1.59718	0.00242093	1.57063	0.00242724	1.69039	-4.88966	1.01012e-06	TRUE
asthma&OA	OA	Coronary Heart	1.59718	0.00242093	1.5744	0.00242977	1.44677	-4.1878	2.81666e-05	TRUE
asthma&OA	OA	Diabetes Type 2	1.59718	0.00242093	1.56962	0.00243085	1.75581	-5.07347	3.90625e-07	TRUE
asthma&OA	OA	HF	1.59718	0.00242093	1.58771	0.00242468	0.596386	-1.73541	0.0826685	FALSE
asthma&OA	OA	Hyperthyroid	1.59718	0.00242093	1.5953	0.00242167	0.117732	-0.343619	0.731133	FALSE
asthma&OA	OA	Hypothyroid	1.59718	0.00242093	1.58761	0.00242443	0.602846	-1.75424	0.079389	FALSE
asthma&OA	OA	Hypertension	1.59718	0.00242093	1.54254	0.00244539	3.54223	-10.1159	4.69681e-24	TRUE
asthma&OA	OA	Obesity	1.59718	0.00242093	1.49716	0.00245163	6.68034	-18.7685	1.36674e-78	TRUE
asthma&OA	OA	AF	1.59718	0.00242093	1.58858	0.00242469	0.54126	-1.57543	0.115158	FALSE
asthma&OA	OA	Allergic Rhinitis	1.59718	0.00242093	1.46561	0.0024707	8.97677	-24.8518	2.47104e-136	TRUE
asthma&OA	OA	Atopic Dermatitis	1.59718	0.00242093	1.57063	0.00242724	1.69039	-4.88966	1.01012e-06	TRUE
asthma&OA	OA	Coronary Heart	1.59718	0.00242093	1.5744	0.00242977	1.44677	-4.1878	2.81666e-05	TRUE
asthma&OA	OA	Diabetes Type 2	1.59718	0.00242093	1.56962	0.00243085	1.75581	-5.07347	3.90625e-07	TRUE
asthma&OA	OA	HF	1.59718	0.00242093	1.58771	0.00242468	0.596386	-1.73541	0.0826685	FALSE
asthma&OA	OA	Hyperthyroid	1.59718	0.00242093	1.5953	0.00242167	0.117732	-0.343619	0.731133	FALSE
asthma&OA	OA	Hypothyroid	1.59718	0.00242093	1.58761	0.00242443	0.602846	-1.75424	0.079389	FALSE
asthma&OA	OA	Hypertension	1.59718	0.00242093	1.54254	0.00244539	3.54223	-10.1159	4.69681e-24	TRUE
asthma&OA	OA	Obesity	1.59718	0.00242093	1.49716	0.00245163	6.68034	-18.7685	1.36674e-78	TRUE
asthma&OA	OA	Asthma	1.59718	0.00242093	1.59718	0.00242093	0	0	1	FALSE
asthma&PMR	PMR	Imd Quintile	1.50954	0.00750617	1.51778	0.00751367	-0.543297	0.512943	0.607991	FALSE
asthma&PMR	PMR	LDL Category	1.50954	0.00750617	1.4158	0.00752739	6.62029	-6.03025	1.6371e-09	TRUE
asthma&PMR	PMR	HDL Category	1.50954	0.00750617	1.38389	0.00752943	9.07936	-8.17412	2.98037e-16	TRUE
asthma&PMR	PMR	Sbp Category	1.50954	0.00750617	1.40455	0.00751659	7.47435	-6.78566	1.1556e-11	TRUE
asthma&PMR	PMR	Dbp Category	1.50954	0.00750617	1.40162	0.00751684	7.69911	-6.98221	2.90582e-12	TRUE
asthma&PMR	PMR	Bmi Category	1.50954	0.00750617	1.34621	0.00754575	12.1324	-10.7589	5.38227e-27	TRUE
asthma&PMR	PMR	Totalcholesterol Category	1.50954	0.00750617	1.38096	0.00752839	9.31024	-8.37357	5.58993e-17	TRUE
asthma&PMR	PMR	Smoking Status Final	1.50954	0.00750617	1.37845	0.00754072	9.50953	-8.53789	1.36691e-17	TRUE
asthma&PMR	PMR	Pa Level	1.50954	0.00750617	1.44997	0.00752637	4.10801	-3.78741	0.000152225	TRUE
asthma&PMR	PMR	Triglyceride Category	1.50954	0.00750617	1.40589	0.0075289	7.37213	-6.69059	2.22267e-11	TRUE
asthma&PMR	PMR	Alcohol Consumption Level	1.50954	0.00750617	1.42371	0.00752267	6.02846	-5.50836	3.62187e-08	TRUE
asthma&PMR	PMR	Albumin Category	1.50954	0.00750617	1.36337	0.00752312	10.7205	-9.58276	9.44841e-22	TRUE
asthma&PMR	PMR	Ethnicity 16cat	1.50954	0.00750617	1.4236	0.00752281	6.03627	-5.51524	3.48306e-08	TRUE
asthma&PMR	PMR	Region	1.50954	0.00750617	1.50699	0.00751297	0.169204	-0.159189	0.87352	FALSE
asthma&PMR	PMR	AF	1.50954	0.00750617	1.48939	0.00751502	1.35261	-1.26492	0.2059	FALSE
asthma&PMR	PMR	Allergic Rhinitis	1.50954	0.00750617	1.42118	0.00764705	6.21719	-5.62888	1.81384e-08	TRUE
asthma&PMR	PMR	Atopic Dermatitis	1.50954	0.00750617	1.48813	0.00752192	1.4386	-1.34414	0.178902	FALSE
asthma&PMR	PMR	Coronary Heart	1.50954	0.00750617	1.47218	0.00752464	2.53769	-2.35786	0.0183806	TRUE
asthma&PMR	PMR	Diabetes Type 2	1.50954	0.00750617	1.4821	0.00751682	1.85104	-1.72657	0.0842448	FALSE
asthma&PMR	PMR	HF	1.50954	0.00750617	1.49255	0.00751896	1.13784	-1.06493	0.28691	FALSE
asthma&PMR	PMR	Hyperthyroid	1.50954	0.00750617	1.50661	0.00750754	0.194429	-0.182964	0.854826	FALSE
asthma&PMR	PMR	Hypothyroid	1.50954	0.00750617	1.49035	0.00751506	1.28726	-1.20419	0.228516	FALSE
asthma&PMR	PMR	Hypertension	1.50954	0.00750617	1.44497	0.00752398	4.46795	-4.11276	3.90961e-05	TRUE
asthma&PMR	PMR	Obesity	1.50954	0.00750617	1.46806	0.00753826	2.82504	-2.61879	0.00882434	TRUE
asthma&PMR	PMR	AF	1.50954	0.00750617	1.48939	0.00751502	1.35261	-1.26492	0.2059	FALSE
asthma&PMR	PMR	Allergic Rhinitis	1.50954	0.00750617	1.42118	0.00764705	6.21719	-5.62888	1.81384e-08	TRUE
asthma&PMR	PMR	Atopic Dermatitis	1.50954	0.00750617	1.48813	0.00752192	1.4386	-1.34414	0.178902	FALSE
asthma&PMR	PMR	Coronary Heart	1.50954	0.00750617	1.47218	0.00752464	2.53769	-2.35786	0.0183806	TRUE
asthma&PMR	PMR	Diabetes Type 2	1.50954	0.00750617	1.4821	0.00751682	1.85104	-1.72657	0.0842448	FALSE
asthma&PMR	PMR	HF	1.50954	0.00750617	1.49255	0.00751896	1.13784	-1.06493	0.28691	FALSE
asthma&PMR	PMR	Hyperthyroid	1.50954	0.00750617	1.50661	0.00750754	0.194429	-0.182964	0.854826	FALSE
asthma&PMR	PMR	Hypothyroid	1.50954	0.00750617	1.49035	0.00751506	1.28726	-1.20419	0.228516	FALSE
asthma&PMR	PMR	Hypertension	1.50954	0.00750617	1.44497	0.00752398	4.46795	-4.11276	3.90961e-05	TRUE
asthma&PMR	PMR	Obesity	1.50954	0.00750617	1.46806	0.00753826	2.82504	-2.61879	0.00882434	TRUE
asthma&PMR	PMR	Asthma	1.50954	0.00750617	1.50954	0.00750617	0	0	1	FALSE
asthma&psoriasis	psoriasis	Imd Quintile	1.27295	0.00420543	1.27256	0.00420587	0.030737	-0.0516709	0.958791	FALSE
asthma&psoriasis	psoriasis	LDL Category	1.27295	0.00420543	1.23237	0.00421478	3.2924	-5.44066	5.30846e-08	TRUE
asthma&psoriasis	psoriasis	HDL Category	1.27295	0.00420543	1.22243	0.00421612	4.13253	-6.80011	1.04536e-11	TRUE
asthma&psoriasis	psoriasis	Sbp Category	1.27295	0.00420543	1.2136	0.00421251	4.8901	-8.02082	1.05046e-15	TRUE
asthma&psoriasis	psoriasis	Dbp Category	1.27295	0.00420543	1.21458	0.00421223	4.80518	-7.88501	3.14504e-15	TRUE
asthma&psoriasis	psoriasis	Bmi Category	1.27295	0.00420543	1.18816	0.00422804	7.13558	-11.558	6.7241e-31	TRUE
asthma&psoriasis	psoriasis	Totalcholesterol Category	1.27295	0.00420543	1.21886	0.00421609	4.43715	-7.29066	3.08445e-13	TRUE
asthma&psoriasis	psoriasis	Smoking Status Final	1.27295	0.00420543	1.18394	0.00422124	7.51737	-12.1644	4.81072e-34	TRUE
asthma&psoriasis	psoriasis	Pa Level	1.27295	0.00420543	1.2478	0.00421258	2.01555	-3.35242	0.000801074	TRUE
asthma&psoriasis	psoriasis	Triglyceride Category	1.27295	0.00420543	1.2258	0.00421652	3.84648	-6.33788	2.32941e-10	TRUE
asthma&psoriasis	psoriasis	Alcohol Consumption Level	1.27295	0.00420543	1.23481	0.00421145	3.08831	-5.11049	3.21324e-07	TRUE
asthma&psoriasis	psoriasis	Albumin Category	1.27295	0.00420543	1.20043	0.00421874	6.04117	-9.84711	7.0544e-23	TRUE
asthma&psoriasis	psoriasis	Ethnicity 16cat	1.27295	0.00420543	1.18377	0.0042255	7.53342	-12.1833	3.81736e-34	TRUE
asthma&psoriasis	psoriasis	Region	1.27295	0.00420543	1.25881	0.00420959	1.12278	-1.87641	0.0605993	FALSE
asthma&psoriasis	psoriasis	AF	1.27295	0.00420543	1.27007	0.00420658	0.226664	-0.380632	0.703476	FALSE
asthma&psoriasis	psoriasis	Allergic Rhinitis	1.27295	0.00420543	1.21718	0.00430027	4.58168	-7.44799	9.47721e-14	TRUE
asthma&psoriasis	psoriasis	Atopic Dermatitis	1.27295	0.00420543	1.2206	0.00422883	4.28833	-7.04052	1.91524e-12	TRUE
asthma&psoriasis	psoriasis	Coronary Heart	1.27295	0.00420543	1.26267	0.00420913	0.814221	-1.3629	0.172914	FALSE
asthma&psoriasis	psoriasis	Diabetes Type 2	1.27295	0.00420543	1.26019	0.0042099	1.01193	-1.69203	0.0906411	FALSE
asthma&psoriasis	psoriasis	HF	1.27295	0.00420543	1.26937	0.00420766	0.281609	-0.47271	0.63642	FALSE
asthma&psoriasis	psoriasis	Hyperthyroid	1.27295	0.00420543	1.27233	0.0042057	0.04846	-0.081459	0.935077	FALSE
asthma&psoriasis	psoriasis	Hypothyroid	1.27295	0.00420543	1.26776	0.00420733	0.409305	-0.686651	0.492302	FALSE
asthma&psoriasis	psoriasis	Hypertension	1.27295	0.00420543	1.25125	0.00421176	1.73394	-2.88831	0.00387319	TRUE
asthma&psoriasis	psoriasis	Obesity	1.27295	0.00420543	1.23737	0.00422465	2.87507	-4.75511	1.98342e-06	TRUE
asthma&psoriasis	psoriasis	AF	1.27295	0.00420543	1.27007	0.00420658	0.226664	-0.380632	0.703476	FALSE
asthma&psoriasis	psoriasis	Allergic Rhinitis	1.27295	0.00420543	1.21718	0.00430027	4.58168	-7.44799	9.47721e-14	TRUE
asthma&psoriasis	psoriasis	Atopic Dermatitis	1.27295	0.00420543	1.2206	0.00422883	4.28833	-7.04052	1.91524e-12	TRUE
asthma&psoriasis	psoriasis	Coronary Heart	1.27295	0.00420543	1.26267	0.00420913	0.814221	-1.3629	0.172914	FALSE
asthma&psoriasis	psoriasis	Diabetes Type 2	1.27295	0.00420543	1.26019	0.0042099	1.01193	-1.69203	0.0906411	FALSE
asthma&psoriasis	psoriasis	HF	1.27295	0.00420543	1.26937	0.00420766	0.281609	-0.47271	0.63642	FALSE
asthma&psoriasis	psoriasis	Hyperthyroid	1.27295	0.00420543	1.27233	0.0042057	0.04846	-0.081459	0.935077	FALSE
asthma&psoriasis	psoriasis	Hypothyroid	1.27295	0.00420543	1.26776	0.00420733	0.409305	-0.686651	0.492302	FALSE
asthma&psoriasis	psoriasis	Hypertension	1.27295	0.00420543	1.25125	0.00421176	1.73394	-2.88831	0.00387319	TRUE
asthma&psoriasis	psoriasis	Obesity	1.27295	0.00420543	1.23737	0.00422465	2.87507	-4.75511	1.98342e-06	TRUE
asthma&psoriasis	psoriasis	Asthma	1.27295	0.00420543	1.27295	0.00420543	0	0	1	FALSE
asthma&RA	RA	Imd Quintile	1.48534	0.00706032	1.47847	0.00706287	0.464259	-0.463806	0.642787	FALSE
asthma&RA	RA	LDL Category	1.48534	0.00706032	1.41604	0.00707657	4.89342	-4.77923	1.75965e-06	TRUE
asthma&RA	RA	HDL Category	1.48534	0.00706032	1.39731	0.00707576	6.29998	-6.1121	9.83269e-10	TRUE
asthma&RA	RA	Sbp Category	1.48534	0.00706032	1.40943	0.00706644	5.38549	-5.25118	1.51124e-07	TRUE
asthma&RA	RA	Dbp Category	1.48534	0.00706032	1.40878	0.00706628	5.434	-5.29732	1.17517e-07	TRUE
asthma&RA	RA	Bmi Category	1.48534	0.00706032	1.36909	0.00709675	8.49078	-8.14088	3.92429e-16	TRUE
asthma&RA	RA	Totalcholesterol Category	1.48534	0.00706032	1.38763	0.00707611	7.04141	-6.8073	9.94474e-12	TRUE
asthma&RA	RA	Smoking Status Final	1.48534	0.00706032	1.38175	0.00708693	7.49679	-7.22645	4.95777e-13	TRUE
asthma&RA	RA	Pa Level	1.48534	0.00706032	1.4295	0.0070786	3.90572	-3.83224	0.00012698	TRUE
asthma&RA	RA	Triglyceride Category	1.48534	0.00706032	1.40937	0.00707612	5.38978	-5.25166	1.50735e-07	TRUE
asthma&RA	RA	Alcohol Consumption Level	1.48534	0.00706032	1.43393	0.00706945	3.58471	-3.52503	0.000423431	TRUE
asthma&RA	RA	Albumin Category	1.48534	0.00706032	1.34866	0.00707597	10.1342	-9.65689	4.59598e-22	TRUE
asthma&RA	RA	Ethnicity 16cat	1.48534	0.00706032	1.40055	0.0070774	6.05394	-5.8796	4.11256e-09	TRUE
asthma&RA	RA	Region	1.48534	0.00706032	1.4799	0.00706356	0.367545	-0.367346	0.713361	FALSE
asthma&RA	RA	AF	1.48534	0.00706032	1.47876	0.00706349	0.444482	-0.444073	0.65699	FALSE
asthma&RA	RA	Allergic Rhinitis	1.48534	0.00706032	1.44199	0.00721263	3.00589	-2.93429	0.00334314	TRUE
asthma&RA	RA	Atopic Dermatitis	1.48534	0.00706032	1.47443	0.00707776	0.739796	-0.737284	0.46095	FALSE
asthma&RA	RA	Coronary Heart	1.48534	0.00706032	1.46076	0.00707175	1.68243	-1.66962	0.0949952	FALSE
asthma&RA	RA	Diabetes Type 2	1.48534	0.00706032	1.46787	0.00706982	1.18998	-1.18396	0.236427	FALSE
asthma&RA	RA	HF	1.48534	0.00706032	1.47185	0.00706799	0.916444	-0.913163	0.361157	FALSE
asthma&RA	RA	Hyperthyroid	1.48534	0.00706032	1.48301	0.0070613	0.156921	-0.157026	0.875225	FALSE
asthma&RA	RA	Hypothyroid	1.48534	0.00706032	1.47251	0.00706562	0.87085	-0.868074	0.385354	FALSE
asthma&RA	RA	Hypertension	1.48534	0.00706032	1.44532	0.00707389	2.76847	-2.73237	0.0062881	TRUE
asthma&RA	RA	Obesity	1.48534	0.00706032	1.44484	0.00709653	2.80313	-2.76168	0.00575041	TRUE
asthma&RA	RA	AF	1.48534	0.00706032	1.47876	0.00706349	0.444482	-0.444073	0.65699	FALSE
asthma&RA	RA	Allergic Rhinitis	1.48534	0.00706032	1.44199	0.00721263	3.00589	-2.93429	0.00334314	TRUE
asthma&RA	RA	Atopic Dermatitis	1.48534	0.00706032	1.47443	0.00707776	0.739796	-0.737284	0.46095	FALSE
asthma&RA	RA	Coronary Heart	1.48534	0.00706032	1.46076	0.00707175	1.68243	-1.66962	0.0949952	FALSE
asthma&RA	RA	Diabetes Type 2	1.48534	0.00706032	1.46787	0.00706982	1.18998	-1.18396	0.236427	FALSE
asthma&RA	RA	HF	1.48534	0.00706032	1.47185	0.00706799	0.916444	-0.913163	0.361157	FALSE
asthma&RA	RA	Hyperthyroid	1.48534	0.00706032	1.48301	0.0070613	0.156921	-0.157026	0.875225	FALSE
asthma&RA	RA	Hypothyroid	1.48534	0.00706032	1.47251	0.00706562	0.87085	-0.868074	0.385354	FALSE
asthma&RA	RA	Hypertension	1.48534	0.00706032	1.44532	0.00707389	2.76847	-2.73237	0.0062881	TRUE
asthma&RA	RA	Obesity	1.48534	0.00706032	1.44484	0.00709653	2.80313	-2.76168	0.00575041	TRUE
asthma&RA	RA	Asthma	1.48534	0.00706032	1.48534	0.00706032	0	0	1	FALSE
COPD&OA	OA	Imd Quintile	1.44101	0.00325759	1.41148	0.00327157	2.09215	-4.48483	7.29711e-06	TRUE
COPD&OA	OA	LDL Category	1.44101	0.00325759	1.313	0.00328921	9.74912	-20.095	8.15661e-90	TRUE
COPD&OA	OA	HDL Category	1.44101	0.00325759	1.28924	0.00328507	11.772	-24.0557	7.27964e-128	TRUE
COPD&OA	OA	Sbp Category	1.44101	0.00325759	1.30896	0.00327639	10.0877	-20.8013	4.20904e-96	TRUE
COPD&OA	OA	Dbp Category	1.44101	0.00325759	1.2955	0.0032766	11.2321	-23.0389	1.90205e-117	TRUE
COPD&OA	OA	Bmi Category	1.44101	0.00325759	1.28243	0.00332788	12.365	-25.0343	2.58513e-138	TRUE
COPD&OA	OA	Totalcholesterol Category	1.44101	0.00325759	1.27144	0.00328623	13.3364	-27.0551	3.32416e-161	TRUE
COPD&OA	OA	Smoking Status Final	1.44101	0.00325759	1.26525	0.00333827	13.891	-27.8865	3.89469e-171	TRUE
COPD&OA	OA	Pa Level	1.44101	0.00325759	1.31696	0.00329331	9.41899	-19.432	4.13553e-84	TRUE
COPD&OA	OA	Triglyceride Category	1.44101	0.00325759	1.30606	0.0032834	10.3322	-21.2587	2.74159e-100	TRUE
COPD&OA	OA	Alcohol Consumption Level	1.44101	0.00325759	1.3344	0.0032874	7.98914	-16.6075	6.15047e-62	TRUE
COPD&OA	OA	Albumin Category	1.44101	0.00325759	1.26934	0.00327528	13.524	-27.4586	5.48154e-166	TRUE
COPD&OA	OA	Ethnicity 16cat	1.44101	0.00325759	1.31118	0.0032723	9.90184	-20.4484	6.20293e-93	TRUE
COPD&OA	OA	Region	1.44101	0.00325759	1.40203	0.00326812	2.77984	-5.94208	2.81426e-09	TRUE
COPD&OA	OA	AF	1.44101	0.00325759	1.41903	0.00326896	1.54865	-3.32999	0.000868484	TRUE
COPD&OA	OA	Allergic Rhinitis	1.44101	0.00325759	1.4185	0.00327062	1.58636	-3.40958	0.000650636	TRUE
COPD&OA	OA	Atopic Dermatitis	1.44101	0.00325759	1.43063	0.00326152	0.725039	-1.56718	0.117073	FALSE
COPD&OA	OA	Coronary Heart	1.44101	0.00325759	1.38123	0.00328074	4.32784	-9.16397	5.00203e-20	TRUE
COPD&OA	OA	Diabetes Type 2	1.44101	0.00325759	1.4094	0.00326614	2.24227	-4.8071	1.53135e-06	TRUE
COPD&OA	OA	HF	1.44101	0.00325759	1.41101	0.00327718	2.12622	-4.55317	5.28441e-06	TRUE
COPD&OA	OA	Hyperthyroid	1.44101	0.00325759	1.43635	0.00325932	0.324244	-0.702492	0.482372	FALSE
COPD&OA	OA	Hypothyroid	1.44101	0.00325759	1.43384	0.00326199	0.499685	-1.08121	0.279605	FALSE
COPD&OA	OA	Hypertension	1.44101	0.00325759	1.38587	0.00328148	3.97836	-8.43724	3.24912e-17	TRUE
COPD&OA	OA	Obesity	1.44101	0.00325759	1.37206	0.00328438	5.02526	-10.5991	3.00745e-26	TRUE
COPD&OA	OA	AF	1.44101	0.00325759	1.41903	0.00326896	1.54865	-3.32999	0.000868484	TRUE
COPD&OA	OA	Allergic Rhinitis	1.44101	0.00325759	1.4185	0.00327062	1.58636	-3.40958	0.000650636	TRUE
COPD&OA	OA	Atopic Dermatitis	1.44101	0.00325759	1.43063	0.00326152	0.725039	-1.56718	0.117073	FALSE
COPD&OA	OA	Coronary Heart	1.44101	0.00325759	1.38123	0.00328074	4.32784	-9.16397	5.00203e-20	TRUE
COPD&OA	OA	Diabetes Type 2	1.44101	0.00325759	1.4094	0.00326614	2.24227	-4.8071	1.53135e-06	TRUE
COPD&OA	OA	HF	1.44101	0.00325759	1.41101	0.00327718	2.12622	-4.55317	5.28441e-06	TRUE
COPD&OA	OA	Hyperthyroid	1.44101	0.00325759	1.43635	0.00325932	0.324244	-0.702492	0.482372	FALSE
COPD&OA	OA	Hypothyroid	1.44101	0.00325759	1.43384	0.00326199	0.499685	-1.08121	0.279605	FALSE
COPD&OA	OA	Hypertension	1.44101	0.00325759	1.38587	0.00328148	3.97836	-8.43724	3.24912e-17	TRUE
COPD&OA	OA	Obesity	1.44101	0.00325759	1.37206	0.00328438	5.02526	-10.5991	3.00745e-26	TRUE
COPD&OA	OA	Asthma	1.44101	0.00325759	1.30352	0.00332047	10.5471	-21.5563	4.62543e-103	TRUE
COPD&PMR	PMR	Imd Quintile	1.3874	0.00887968	1.45083	0.00892983	-4.3718	3.5497	0.000385664	TRUE
COPD&PMR	PMR	LDL Category	1.3874	0.00887968	1.28164	0.00891406	8.25205	-6.30198	2.93866e-10	TRUE
COPD&PMR	PMR	HDL Category	1.3874	0.00887968	1.24353	0.00890756	11.5693	-8.70411	3.20088e-18	TRUE
COPD&PMR	PMR	Sbp Category	1.3874	0.00887968	1.26314	0.00890247	9.83764	-7.46253	8.48757e-14	TRUE
COPD&PMR	PMR	Dbp Category	1.3874	0.00887968	1.24241	0.00890613	11.67	-8.77654	1.68581e-18	TRUE
COPD&PMR	PMR	Bmi Category	1.3874	0.00887968	1.2266	0.00893883	13.1092	-9.77672	1.41735e-22	TRUE
COPD&PMR	PMR	Totalcholesterol Category	1.3874	0.00887968	1.24033	0.00891197	11.8571	-8.90672	5.2563e-19	TRUE
COPD&PMR	PMR	Smoking Status Final	1.3874	0.00887968	1.23428	0.00904308	12.4059	-9.22737	2.77355e-20	TRUE
COPD&PMR	PMR	Pa Level	1.3874	0.00887968	1.3146	0.00893266	5.53787	-4.27935	1.87439e-05	TRUE
COPD&PMR	PMR	Triglyceride Category	1.3874	0.00887968	1.26597	0.00890293	9.59234	-7.28453	3.22792e-13	TRUE
COPD&PMR	PMR	Alcohol Consumption Level	1.3874	0.00887968	1.2858	0.0089092	7.90182	-6.04608	1.48416e-09	TRUE
COPD&PMR	PMR	Albumin Category	1.3874	0.00887968	1.20665	0.00890334	14.9794	-11.1005	1.24804e-28	TRUE
COPD&PMR	PMR	Ethnicity 16cat	1.3874	0.00887968	1.24715	0.00889673	11.2455	-8.47818	2.28736e-17	TRUE
COPD&PMR	PMR	Region	1.3874	0.00887968	1.4009	0.00889878	-0.963166	0.769877	0.441373	FALSE
COPD&PMR	PMR	AF	1.3874	0.00887968	1.35147	0.00890378	2.65894	-2.08688	0.0368993	TRUE
COPD&PMR	PMR	Allergic Rhinitis	1.3874	0.00887968	1.36249	0.00889239	1.82851	-1.44189	0.149333	FALSE
COPD&PMR	PMR	Atopic Dermatitis	1.3874	0.00887968	1.37693	0.00888455	0.760522	-0.603162	0.546401	FALSE
COPD&PMR	PMR	Coronary Heart	1.3874	0.00887968	1.32225	0.00893026	4.92709	-3.81905	0.000133965	TRUE
COPD&PMR	PMR	Diabetes Type 2	1.3874	0.00887968	1.3609	0.00888726	1.9478	-1.53551	0.124659	FALSE
COPD&PMR	PMR	HF	1.3874	0.00887968	1.35183	0.00893616	2.63148	-2.06184	0.039223	TRUE
COPD&PMR	PMR	Hyperthyroid	1.3874	0.00887968	1.38115	0.0088842	0.452624	-0.359529	0.719199	FALSE
COPD&PMR	PMR	Hypothyroid	1.3874	0.00887968	1.36984	0.00888882	1.28189	-1.01378	0.310687	FALSE
COPD&PMR	PMR	Hypertension	1.3874	0.00887968	1.32526	0.00889414	4.68891	-3.646	0.000266351	TRUE
COPD&PMR	PMR	Obesity	1.3874	0.00887968	1.35817	0.00889263	2.15245	-1.69462	0.0901481	FALSE
COPD&PMR	PMR	AF	1.3874	0.00887968	1.35147	0.00890378	2.65894	-2.08688	0.0368993	TRUE
COPD&PMR	PMR	Allergic Rhinitis	1.3874	0.00887968	1.36249	0.00889239	1.82851	-1.44189	0.149333	FALSE
COPD&PMR	PMR	Atopic Dermatitis	1.3874	0.00887968	1.37693	0.00888455	0.760522	-0.603162	0.546401	FALSE
COPD&PMR	PMR	Coronary Heart	1.3874	0.00887968	1.32225	0.00893026	4.92709	-3.81905	0.000133965	TRUE
COPD&PMR	PMR	Diabetes Type 2	1.3874	0.00887968	1.3609	0.00888726	1.9478	-1.53551	0.124659	FALSE
COPD&PMR	PMR	HF	1.3874	0.00887968	1.35183	0.00893616	2.63148	-2.06184	0.039223	TRUE
COPD&PMR	PMR	Hyperthyroid	1.3874	0.00887968	1.38115	0.0088842	0.452624	-0.359529	0.719199	FALSE
COPD&PMR	PMR	Hypothyroid	1.3874	0.00887968	1.36984	0.00888882	1.28189	-1.01378	0.310687	FALSE
COPD&PMR	PMR	Hypertension	1.3874	0.00887968	1.32526	0.00889414	4.68891	-3.646	0.000266351	TRUE
COPD&PMR	PMR	Obesity	1.3874	0.00887968	1.35817	0.00889263	2.15245	-1.69462	0.0901481	FALSE
COPD&PMR	PMR	Asthma	1.3874	0.00887968	1.26267	0.00914085	9.87811	-7.39196	1.44679e-13	TRUE
COPD&psoriasis	psoriasis	Imd Quintile	1.60122	0.00591342	1.61566	0.00594167	-0.893773	1.07099	0.284176	FALSE
COPD&psoriasis	psoriasis	LDL Category	1.60122	0.00591342	1.53015	0.00593324	4.64453	-5.41957	5.97436e-08	TRUE
COPD&psoriasis	psoriasis	HDL Category	1.60122	0.00591342	1.5205	0.00592169	5.30847	-6.18061	6.38536e-10	TRUE
COPD&psoriasis	psoriasis	Sbp Category	1.60122	0.00591342	1.51903	0.00592331	5.41043	-6.29539	3.0663e-10	TRUE
COPD&psoriasis	psoriasis	Dbp Category	1.60122	0.00591342	1.5133	0.00592524	5.80989	-6.7462	1.51768e-11	TRUE
COPD&psoriasis	psoriasis	Bmi Category	1.60122	0.00591342	1.5017	0.00595295	6.62689	-7.64709	2.05576e-14	TRUE
COPD&psoriasis	psoriasis	Totalcholesterol Category	1.60122	0.00591342	1.51649	0.00592591	5.58693	-6.49384	8.36741e-11	TRUE
COPD&psoriasis	psoriasis	Smoking Status Final	1.60122	0.00591342	1.38264	0.00597981	15.8084	-17.4516	3.34573e-68	TRUE
COPD&psoriasis	psoriasis	Pa Level	1.60122	0.00591342	1.54464	0.00594424	3.66283	-4.29038	1.78367e-05	TRUE
COPD&psoriasis	psoriasis	Triglyceride Category	1.60122	0.00591342	1.52597	0.00592205	4.93091	-5.75126	8.8583e-09	TRUE
COPD&psoriasis	psoriasis	Alcohol Consumption Level	1.60122	0.00591342	1.53281	0.00592663	4.46261	-5.21477	1.8405e-07	TRUE
COPD&psoriasis	psoriasis	Albumin Category	1.60122	0.00591342	1.48092	0.00592955	8.12331	-9.32645	1.09473e-20	TRUE
COPD&psoriasis	psoriasis	Ethnicity 16cat	1.60122	0.00591342	1.47285	0.00592212	8.71552	-9.985	1.77301e-23	TRUE
COPD&psoriasis	psoriasis	Region	1.60122	0.00591342	1.57516	0.00592181	1.65393	-1.96014	0.0499791	TRUE
COPD&psoriasis	psoriasis	AF	1.60122	0.00591342	1.59041	0.00592323	0.679586	-0.809205	0.418397	FALSE
COPD&psoriasis	psoriasis	Allergic Rhinitis	1.60122	0.00591342	1.58753	0.0059174	0.862193	-1.02622	0.30479	FALSE
COPD&psoriasis	psoriasis	Atopic Dermatitis	1.60122	0.00591342	1.5751	0.00592511	1.65831	-1.96474	0.0494443	TRUE
COPD&psoriasis	psoriasis	Coronary Heart	1.60122	0.00591342	1.55885	0.00594495	2.71758	-3.19769	0.00138535	TRUE
COPD&psoriasis	psoriasis	Diabetes Type 2	1.60122	0.00591342	1.57793	0.00591999	1.47566	-1.75068	0.0800018	FALSE
COPD&psoriasis	psoriasis	HF	1.60122	0.00591342	1.586	0.00594501	0.959193	-1.13846	0.254929	FALSE
COPD&psoriasis	psoriasis	Hyperthyroid	1.60122	0.00591342	1.5992	0.00591478	0.126001	-0.150555	0.880327	FALSE
COPD&psoriasis	psoriasis	Hypothyroid	1.60122	0.00591342	1.59563	0.00591512	0.350234	-0.418006	0.675943	FALSE
COPD&psoriasis	psoriasis	Hypertension	1.60122	0.00591342	1.56807	0.00592101	2.11365	-2.49949	0.0124374	TRUE
COPD&psoriasis	psoriasis	Obesity	1.60122	0.00591342	1.563	0.00592363	2.44483	-2.88578	0.00390441	TRUE
COPD&psoriasis	psoriasis	AF	1.60122	0.00591342	1.59041	0.00592323	0.679586	-0.809205	0.418397	FALSE
COPD&psoriasis	psoriasis	Allergic Rhinitis	1.60122	0.00591342	1.58753	0.0059174	0.862193	-1.02622	0.30479	FALSE
COPD&psoriasis	psoriasis	Atopic Dermatitis	1.60122	0.00591342	1.5751	0.00592511	1.65831	-1.96474	0.0494443	TRUE
COPD&psoriasis	psoriasis	Coronary Heart	1.60122	0.00591342	1.55885	0.00594495	2.71758	-3.19769	0.00138535	TRUE
COPD&psoriasis	psoriasis	Diabetes Type 2	1.60122	0.00591342	1.57793	0.00591999	1.47566	-1.75068	0.0800018	FALSE
COPD&psoriasis	psoriasis	HF	1.60122	0.00591342	1.586	0.00594501	0.959193	-1.13846	0.254929	FALSE
COPD&psoriasis	psoriasis	Hyperthyroid	1.60122	0.00591342	1.5992	0.00591478	0.126001	-0.150555	0.880327	FALSE
COPD&psoriasis	psoriasis	Hypothyroid	1.60122	0.00591342	1.59563	0.00591512	0.350234	-0.418006	0.675943	FALSE
COPD&psoriasis	psoriasis	Hypertension	1.60122	0.00591342	1.56807	0.00592101	2.11365	-2.49949	0.0124374	TRUE
COPD&psoriasis	psoriasis	Obesity	1.60122	0.00591342	1.563	0.00592363	2.44483	-2.88578	0.00390441	TRUE
COPD&psoriasis	psoriasis	Asthma	1.60122	0.00591342	1.5284	0.00601004	4.76406	-5.51988	3.39226e-08	TRUE
COPD&RA	RA	Imd Quintile	2.04136	0.00846706	1.99757	0.00851586	2.19219	-1.80577	0.0709547	FALSE
COPD&RA	RA	LDL Category	2.04136	0.00846706	1.89686	0.00850154	7.61786	-6.11873	9.43243e-10	TRUE
COPD&RA	RA	HDL Category	2.04136	0.00846706	1.88641	0.00848235	8.21439	-6.58688	4.49153e-11	TRUE
COPD&RA	RA	Sbp Category	2.04136	0.00846706	1.90326	0.00848614	7.25607	-5.84339	5.11485e-09	TRUE
COPD&RA	RA	Dbp Category	2.04136	0.00846706	1.89698	0.00849007	7.61104	-6.11759	9.50012e-10	TRUE
COPD&RA	RA	Bmi Category	2.04136	0.00846706	1.83794	0.00853656	11.0678	-8.73044	2.53679e-18	TRUE
COPD&RA	RA	Totalcholesterol Category	2.04136	0.00846706	1.8504	0.00849043	10.3199	-8.19084	2.59401e-16	TRUE
COPD&RA	RA	Smoking Status Final	2.04136	0.00846706	1.79697	0.00863191	13.6002	-10.546	5.30141e-26	TRUE
COPD&RA	RA	Pa Level	2.04136	0.00846706	1.88383	0.00852587	8.36253	-6.68383	2.32773e-11	TRUE
COPD&RA	RA	Triglyceride Category	2.04136	0.00846706	1.90548	0.0084844	7.13143	-5.74698	9.0851e-09	TRUE
COPD&RA	RA	Alcohol Consumption Level	2.04136	0.00846706	1.94883	0.00849259	4.74803	-3.86812	0.00010968	TRUE
COPD&RA	RA	Albumin Category	2.04136	0.00846706	1.77392	0.00849253	15.0765	-11.7098	1.13503e-31	TRUE
COPD&RA	RA	Ethnicity 16cat	2.04136	0.00846706	1.90696	0.0084931	7.04804	-5.6791	1.35404e-08	TRUE
COPD&RA	RA	Region	2.04136	0.00846706	2.01958	0.00848366	1.07882	-0.895252	0.370652	FALSE
COPD&RA	RA	AF	2.04136	0.00846706	2.0221	0.00848427	0.952571	-0.790948	0.428974	FALSE
COPD&RA	RA	Allergic Rhinitis	2.04136	0.00846706	2.02491	0.00847381	0.812562	-0.675581	0.499307	FALSE
COPD&RA	RA	Atopic Dermatitis	2.04136	0.00846706	2.03418	0.00846997	0.35298	-0.294214	0.768595	FALSE
COPD&RA	RA	Coronary Heart	2.04136	0.00846706	1.96565	0.00852464	3.85168	-3.14553	0.00165788	TRUE
COPD&RA	RA	Diabetes Type 2	2.04136	0.00846706	2.01344	0.00847663	1.3868	-1.14955	0.250329	FALSE
COPD&RA	RA	HF	2.04136	0.00846706	1.99432	0.00852725	2.35889	-1.94018	0.0523573	FALSE
COPD&RA	RA	Hyperthyroid	2.04136	0.00846706	2.03359	0.00847152	0.382188	-0.318483	0.750119	FALSE
COPD&RA	RA	Hypothyroid	2.04136	0.00846706	2.0253	0.00847267	0.792921	-0.659359	0.509665	FALSE
COPD&RA	RA	Hypertension	2.04136	0.00846706	1.98218	0.00848065	2.98603	-2.45523	0.0140793	TRUE
COPD&RA	RA	Obesity	2.04136	0.00846706	1.99885	0.00848149	2.12689	-1.7561	0.0790719	FALSE
COPD&RA	RA	AF	2.04136	0.00846706	2.0221	0.00848427	0.952571	-0.790948	0.428974	FALSE
COPD&RA	RA	Allergic Rhinitis	2.04136	0.00846706	2.02491	0.00847381	0.812562	-0.675581	0.499307	FALSE
COPD&RA	RA	Atopic Dermatitis	2.04136	0.00846706	2.03418	0.00846997	0.35298	-0.294214	0.768595	FALSE
COPD&RA	RA	Coronary Heart	2.04136	0.00846706	1.96565	0.00852464	3.85168	-3.14553	0.00165788	TRUE
COPD&RA	RA	Diabetes Type 2	2.04136	0.00846706	2.01344	0.00847663	1.3868	-1.14955	0.250329	FALSE
COPD&RA	RA	HF	2.04136	0.00846706	1.99432	0.00852725	2.35889	-1.94018	0.0523573	FALSE
COPD&RA	RA	Hyperthyroid	2.04136	0.00846706	2.03359	0.00847152	0.382188	-0.318483	0.750119	FALSE
COPD&RA	RA	Hypothyroid	2.04136	0.00846706	2.0253	0.00847267	0.792921	-0.659359	0.509665	FALSE
COPD&RA	RA	Hypertension	2.04136	0.00846706	1.98218	0.00848065	2.98603	-2.45523	0.0140793	TRUE
COPD&RA	RA	Obesity	2.04136	0.00846706	1.99885	0.00848149	2.12689	-1.7561	0.0790719	FALSE
COPD&RA	RA	Asthma	2.04136	0.00846706	1.89435	0.00869209	7.76063	-6.15953	7.29604e-10	TRUE
OA&asthma	asthma	Imd Quintile	1.60049	0.00244632	1.59705	0.00244775	0.21569	-0.622596	0.53355	FALSE
OA&asthma	asthma	LDL Category	1.60049	0.00244632	1.52371	0.00246533	5.03935	-14.1559	1.71613e-45	TRUE
OA&asthma	asthma	HDL Category	1.60049	0.00244632	1.50702	0.00246449	6.20241	-17.3295	2.81602e-67	TRUE
OA&asthma	asthma	Sbp Category	1.60049	0.00244632	1.50544	0.00245636	6.31387	-17.6609	8.386e-70	TRUE
OA&asthma	asthma	Dbp Category	1.60049	0.00244632	1.50806	0.00245565	6.12905	-17.1615	5.15713e-66	TRUE
OA&asthma	asthma	Bmi Category	1.60049	0.00244632	1.40362	0.00248122	14.0261	-37.6702	0	TRUE
OA&asthma	asthma	Totalcholesterol Category	1.60049	0.00244632	1.50335	0.00246389	6.46126	-18.0328	1.07787e-72	TRUE
OA&asthma	asthma	Smoking Status Final	1.60049	0.00244632	1.47794	0.002465	8.29167	-22.9374	1.97026e-116	TRUE
OA&asthma	asthma	Pa Level	1.60049	0.00244632	1.53781	0.00246269	4.07602	-11.5093	1.184e-30	TRUE
OA&asthma	asthma	Triglyceride Category	1.60049	0.00244632	1.51395	0.00246602	5.71585	-16.0021	1.23501e-57	TRUE
OA&asthma	asthma	Alcohol Consumption Level	1.60049	0.00244632	1.53143	0.00245989	4.50955	-12.7141	4.93629e-37	TRUE
OA&asthma	asthma	Albumin Category	1.60049	0.00244632	1.48536	0.00246205	7.75088	-21.5087	1.29009e-102	TRUE
OA&asthma	asthma	Ethnicity 16cat	1.60049	0.00244632	1.50205	0.00245725	6.5535	-18.307	7.27147e-75	TRUE
OA&asthma	asthma	Region	1.60049	0.00244632	1.58493	0.00245155	0.981776	-2.82096	0.00478805	TRUE
OA&asthma	asthma	AF	1.60049	0.00244632	1.5903	0.00245124	0.640635	-1.84399	0.065185	FALSE
OA&asthma	asthma	Allergic Rhinitis	1.60049	0.00244632	1.4691	0.00250173	8.94348	-24.4808	2.36427e-132	TRUE
OA&asthma	asthma	Atopic Dermatitis	1.60049	0.00244632	1.57262	0.00245518	1.772	-5.06792	4.02186e-07	TRUE
OA&asthma	asthma	Coronary Heart	1.60049	0.00244632	1.57772	0.00245457	1.44342	-4.13539	3.5436e-05	TRUE
OA&asthma	asthma	Diabetes Type 2	1.60049	0.00244632	1.57409	0.00245332	1.67703	-4.80036	1.58379e-06	TRUE
OA&asthma	asthma	HF	1.60049	0.00244632	1.58904	0.00245161	0.720489	-2.07286	0.0381856	TRUE
OA&asthma	asthma	Hyperthyroid	1.60049	0.00244632	1.59864	0.00244693	0.115755	-0.334352	0.738114	FALSE
OA&asthma	asthma	Hypothyroid	1.60049	0.00244632	1.5901	0.00244961	0.653195	-1.88065	0.0600199	FALSE
OA&asthma	asthma	Hypertension	1.60049	0.00244632	1.54707	0.00246487	3.45298	-9.77522	1.4385e-22	TRUE
OA&asthma	asthma	Obesity	1.60049	0.00244632	1.50283	0.00247127	6.49806	-18.105	2.91127e-73	TRUE
OA&asthma	asthma	AF	1.60049	0.00244632	1.5903	0.00245124	0.640635	-1.84399	0.065185	FALSE
OA&asthma	asthma	Allergic Rhinitis	1.60049	0.00244632	1.4691	0.00250173	8.94348	-24.4808	2.36427e-132	TRUE
OA&asthma	asthma	Atopic Dermatitis	1.60049	0.00244632	1.57262	0.00245518	1.772	-5.06792	4.02186e-07	TRUE
OA&asthma	asthma	Coronary Heart	1.60049	0.00244632	1.57772	0.00245457	1.44342	-4.13539	3.5436e-05	TRUE
OA&asthma	asthma	Diabetes Type 2	1.60049	0.00244632	1.57409	0.00245332	1.67703	-4.80036	1.58379e-06	TRUE
OA&asthma	asthma	HF	1.60049	0.00244632	1.58904	0.00245161	0.720489	-2.07286	0.0381856	TRUE
OA&asthma	asthma	Hyperthyroid	1.60049	0.00244632	1.59864	0.00244693	0.115755	-0.334352	0.738114	FALSE
OA&asthma	asthma	Hypothyroid	1.60049	0.00244632	1.5901	0.00244961	0.653195	-1.88065	0.0600199	FALSE
OA&asthma	asthma	Hypertension	1.60049	0.00244632	1.54707	0.00246487	3.45298	-9.77522	1.4385e-22	TRUE
OA&asthma	asthma	Obesity	1.60049	0.00244632	1.50283	0.00247127	6.49806	-18.105	2.91127e-73	TRUE
OA&asthma	asthma	Asthma	1.60049	0.00244632	1.60049	0.00244632	0	0	1	FALSE
OA&COPD	COPD	Imd Quintile	1.45878	0.00324849	1.43927	0.00326863	1.35496	-2.92051	0.0034946	TRUE
OA&COPD	COPD	LDL Category	1.45878	0.00324849	1.30459	0.00329045	11.8187	-24.1593	5.96312e-129	TRUE
OA&COPD	COPD	HDL Category	1.45878	0.00324849	1.2829	0.00328375	13.709	-27.8136	2.97094e-170	TRUE
OA&COPD	COPD	Sbp Category	1.45878	0.00324849	1.29928	0.0032809	12.2757	-25.0783	8.58102e-139	TRUE
OA&COPD	COPD	Dbp Category	1.45878	0.00324849	1.2885	0.00327889	13.2151	-26.8913	2.7758e-159	TRUE
OA&COPD	COPD	Bmi Category	1.45878	0.00324849	1.26925	0.00333433	14.9316	-29.8953	2.26347e-196	TRUE
OA&COPD	COPD	Totalcholesterol Category	1.45878	0.00324849	1.26445	0.00328612	15.3679	-30.9379	3.69496e-210	TRUE
OA&COPD	COPD	Smoking Status Final	1.45878	0.00324849	1.28405	0.00334829	13.6074	-27.347	1.17144e-164	TRUE
OA&COPD	COPD	Pa Level	1.45878	0.00324849	1.31747	0.00329627	10.7258	-22.0154	2.05181e-107	TRUE
OA&COPD	COPD	Triglyceride Category	1.45878	0.00324849	1.29797	0.0032844	12.3893	-25.2836	4.83563e-141	TRUE
OA&COPD	COPD	Alcohol Consumption Level	1.45878	0.00324849	1.33711	0.00328773	9.09876	-18.8415	3.45024e-79	TRUE
OA&COPD	COPD	Albumin Category	1.45878	0.00324849	1.25737	0.00328105	16.0182	-32.1795	3.41941e-227	TRUE
OA&COPD	COPD	Ethnicity 16cat	1.45878	0.00324849	1.31233	0.00327033	11.1593	-22.9513	1.43073e-116	TRUE
OA&COPD	COPD	Region	1.45878	0.00324849	1.42019	0.00325832	2.71655	-5.82547	5.69513e-09	TRUE
OA&COPD	COPD	AF	1.45878	0.00324849	1.43156	0.00326436	1.90086	-4.08883	4.3356e-05	TRUE
OA&COPD	COPD	Allergic Rhinitis	1.45878	0.00324849	1.43533	0.00326128	1.63374	-3.52053	0.000430679	TRUE
OA&COPD	COPD	Atopic Dermatitis	1.45878	0.00324849	1.44699	0.00325415	0.814305	-1.7638	0.0777653	FALSE
OA&COPD	COPD	Coronary Heart	1.45878	0.00324849	1.39015	0.00327933	4.9363	-10.4385	1.65339e-25	TRUE
OA&COPD	COPD	Diabetes Type 2	1.45878	0.00324849	1.42368	0.00325855	2.46505	-5.29247	1.20678e-07	TRUE
OA&COPD	COPD	HF	1.45878	0.00324849	1.41746	0.00327723	2.91474	-6.22629	4.77624e-10	TRUE
OA&COPD	COPD	Hyperthyroid	1.45878	0.00324849	1.45383	0.00325035	0.33986	-0.738316	0.460323	FALSE
OA&COPD	COPD	Hypothyroid	1.45878	0.00324849	1.4508	0.00325285	0.549523	-1.19209	0.233227	FALSE
OA&COPD	COPD	Hypertension	1.45878	0.00324849	1.38716	0.00328314	5.16297	-10.8996	1.15775e-27	TRUE
OA&COPD	COPD	Obesity	1.45878	0.00324849	1.38582	0.0032756	5.26428	-11.1209	9.92128e-29	TRUE
OA&COPD	COPD	AF	1.45878	0.00324849	1.43156	0.00326436	1.90086	-4.08883	4.3356e-05	TRUE
OA&COPD	COPD	Allergic Rhinitis	1.45878	0.00324849	1.43533	0.00326128	1.63374	-3.52053	0.000430679	TRUE
OA&COPD	COPD	Atopic Dermatitis	1.45878	0.00324849	1.44699	0.00325415	0.814305	-1.7638	0.0777653	FALSE
OA&COPD	COPD	Coronary Heart	1.45878	0.00324849	1.39015	0.00327933	4.9363	-10.4385	1.65339e-25	TRUE
OA&COPD	COPD	Diabetes Type 2	1.45878	0.00324849	1.42368	0.00325855	2.46505	-5.29247	1.20678e-07	TRUE
OA&COPD	COPD	HF	1.45878	0.00324849	1.41746	0.00327723	2.91474	-6.22629	4.77624e-10	TRUE
OA&COPD	COPD	Hyperthyroid	1.45878	0.00324849	1.45383	0.00325035	0.33986	-0.738316	0.460323	FALSE
OA&COPD	COPD	Hypothyroid	1.45878	0.00324849	1.4508	0.00325285	0.549523	-1.19209	0.233227	FALSE
OA&COPD	COPD	Hypertension	1.45878	0.00324849	1.38716	0.00328314	5.16297	-10.8996	1.15775e-27	TRUE
OA&COPD	COPD	Obesity	1.45878	0.00324849	1.38582	0.0032756	5.26428	-11.1209	9.92128e-29	TRUE
OA&COPD	COPD	Asthma	1.45878	0.00324849	1.32792	0.0033158	9.85379	-20.2461	3.84771e-91	TRUE
PMR&asthma	asthma	Imd Quintile	1.43206	0.00746546	1.43473	0.00746752	-0.186139	0.176446	0.859944	FALSE
PMR&asthma	asthma	LDL Category	1.43206	0.00746546	1.40269	0.00747756	2.09332	-1.96067	0.0499171	TRUE
PMR&asthma	asthma	HDL Category	1.43206	0.00746546	1.39273	0.00747689	2.82399	-2.63571	0.00839621	TRUE
PMR&asthma	asthma	Sbp Category	1.43206	0.00746546	1.38002	0.00747022	3.77053	-3.50454	0.000457402	TRUE
PMR&asthma	asthma	Dbp Category	1.43206	0.00746546	1.37963	0.00747	3.80012	-3.53159	0.000413074	TRUE
PMR&asthma	asthma	Bmi Category	1.43206	0.00746546	1.35335	0.00750165	5.81604	-5.34158	9.21425e-08	TRUE
PMR&asthma	asthma	Totalcholesterol Category	1.43206	0.00746546	1.39059	0.00747576	2.98224	-2.78147	0.0054113	TRUE
PMR&asthma	asthma	Smoking Status Final	1.43206	0.00746546	1.35285	0.00749172	5.85479	-5.37975	7.45909e-08	TRUE
PMR&asthma	asthma	Pa Level	1.43206	0.00746546	1.41292	0.0074786	1.3543	-1.27302	0.203009	FALSE
PMR&asthma	asthma	Triglyceride Category	1.43206	0.00746546	1.39782	0.00747895	2.44962	-2.29018	0.0220111	TRUE
PMR&asthma	asthma	Alcohol Consumption Level	1.43206	0.00746546	1.38917	0.00747604	3.08688	-2.87755	0.00400781	TRUE
PMR&asthma	asthma	Albumin Category	1.43206	0.00746546	1.35798	0.00747452	5.45521	-5.02796	4.95737e-07	TRUE
PMR&asthma	asthma	Ethnicity 16cat	1.43206	0.00746546	1.37109	0.007479	4.44673	-4.11713	3.83626e-05	TRUE
PMR&asthma	asthma	Region	1.43206	0.00746546	1.41776	0.00747003	1.00841	-0.950063	0.34208	FALSE
PMR&asthma	asthma	AF	1.43206	0.00746546	1.41062	0.00747347	1.52	-1.4281	0.153263	FALSE
PMR&asthma	asthma	Allergic Rhinitis	1.43206	0.00746546	1.35818	0.0076288	5.43942	-4.96224	6.96848e-07	TRUE
PMR&asthma	asthma	Atopic Dermatitis	1.43206	0.00746546	1.41027	0.00749098	1.54455	-1.44929	0.147256	FALSE
PMR&asthma	asthma	Coronary Heart	1.43206	0.00746546	1.40318	0.00747832	2.05822	-1.92803	0.0538513	FALSE
PMR&asthma	asthma	Diabetes Type 2	1.43206	0.00746546	1.41823	0.00747588	0.974852	-0.918239	0.358494	FALSE
PMR&asthma	asthma	HF	1.43206	0.00746546	1.41023	0.00747772	1.54738	-1.45322	0.146163	FALSE
PMR&asthma	asthma	Hyperthyroid	1.43206	0.00746546	1.42989	0.00746647	0.151457	-0.143338	0.886023	FALSE
PMR&asthma	asthma	Hypothyroid	1.43206	0.00746546	1.41442	0.00747305	1.24669	-1.17293	0.240823	FALSE
PMR&asthma	asthma	Hypertension	1.43206	0.00746546	1.39406	0.00747934	2.72546	-2.54455	0.0109418	TRUE
PMR&asthma	asthma	Obesity	1.43206	0.00746546	1.41304	0.00749844	1.34603	-1.26362	0.206367	FALSE
PMR&asthma	asthma	AF	1.43206	0.00746546	1.41062	0.00747347	1.52	-1.4281	0.153263	FALSE
PMR&asthma	asthma	Allergic Rhinitis	1.43206	0.00746546	1.35818	0.0076288	5.43942	-4.96224	6.96848e-07	TRUE
PMR&asthma	asthma	Atopic Dermatitis	1.43206	0.00746546	1.41027	0.00749098	1.54455	-1.44929	0.147256	FALSE
PMR&asthma	asthma	Coronary Heart	1.43206	0.00746546	1.40318	0.00747832	2.05822	-1.92803	0.0538513	FALSE
PMR&asthma	asthma	Diabetes Type 2	1.43206	0.00746546	1.41823	0.00747588	0.974852	-0.918239	0.358494	FALSE
PMR&asthma	asthma	HF	1.43206	0.00746546	1.41023	0.00747772	1.54738	-1.45322	0.146163	FALSE
PMR&asthma	asthma	Hyperthyroid	1.43206	0.00746546	1.42989	0.00746647	0.151457	-0.143338	0.886023	FALSE
PMR&asthma	asthma	Hypothyroid	1.43206	0.00746546	1.41442	0.00747305	1.24669	-1.17293	0.240823	FALSE
PMR&asthma	asthma	Hypertension	1.43206	0.00746546	1.39406	0.00747934	2.72546	-2.54455	0.0109418	TRUE
PMR&asthma	asthma	Obesity	1.43206	0.00746546	1.41304	0.00749844	1.34603	-1.26362	0.206367	FALSE
PMR&asthma	asthma	Asthma	1.43206	0.00746546	1.43206	0.00746546	0	0	1	FALSE
PMR&COPD	COPD	Imd Quintile	1.14024	0.00892297	1.21235	0.00899067	-5.94852	4.84157	1.28817e-06	TRUE
PMR&COPD	COPD	LDL Category	1.14024	0.00892297	1.07668	0.00894502	5.90248	-4.53901	5.65189e-06	TRUE
PMR&COPD	COPD	HDL Category	1.14024	0.00892297	1.04788	0.00893276	8.81398	-6.69018	2.22889e-11	TRUE
PMR&COPD	COPD	Sbp Category	1.14024	0.00892297	1.0394	0.0089498	9.70083	-7.32608	2.36985e-13	TRUE
PMR&COPD	COPD	Dbp Category	1.14024	0.00892297	1.03046	0.00894571	10.6533	-8.01196	1.12891e-15	TRUE
PMR&COPD	COPD	Bmi Category	1.14024	0.00892297	1.02216	0.00902267	11.5511	-8.61426	7.0395e-18	TRUE
PMR&COPD	COPD	Totalcholesterol Category	1.14024	0.00892297	1.04542	0.00893839	9.06959	-6.87384	6.2495e-12	TRUE
PMR&COPD	COPD	Smoking Status Final	1.14024	0.00892297	1.04851	0.00916304	8.74793	-6.55694	5.49223e-11	TRUE
PMR&COPD	COPD	Pa Level	1.14024	0.00892297	1.09144	0.00898165	4.47112	-3.45487	0.000550563	TRUE
PMR&COPD	COPD	Triglyceride Category	1.14024	0.00892297	1.06096	0.00893283	7.47164	-5.70704	1.1496e-08	TRUE
PMR&COPD	COPD	Alcohol Consumption Level	1.14024	0.00892297	1.06542	0.00895207	7.02179	-5.36903	7.91622e-08	TRUE
PMR&COPD	COPD	Albumin Category	1.14024	0.00892297	1.00776	0.00894297	13.145	-9.77587	1.42918e-22	TRUE
PMR&COPD	COPD	Ethnicity 16cat	1.14024	0.00892297	1.03395	0.00893816	10.279	-7.74708	9.40305e-15	TRUE
PMR&COPD	COPD	Region	1.14024	0.00892297	1.15218	0.00893971	-1.03666	0.825021	0.40936	FALSE
PMR&COPD	COPD	AF	1.14024	0.00892297	1.11148	0.00894549	2.58687	-2.02137	0.0432418	TRUE
PMR&COPD	COPD	Allergic Rhinitis	1.14024	0.00892297	1.1262	0.00892908	1.24632	-0.981213	0.326488	FALSE
PMR&COPD	COPD	Atopic Dermatitis	1.14024	0.00892297	1.13181	0.00892802	0.744214	-0.587408	0.55693	FALSE
PMR&COPD	COPD	Coronary Heart	1.14024	0.00892297	1.08512	0.00898428	5.07951	-3.91293	9.11819e-05	TRUE
PMR&COPD	COPD	Diabetes Type 2	1.14024	0.00892297	1.1228	0.00892972	1.55255	-1.22042	0.222307	FALSE
PMR&COPD	COPD	HF	1.14024	0.00892297	1.10094	0.00899807	3.56953	-2.76771	0.00564518	TRUE
PMR&COPD	COPD	Hyperthyroid	1.14024	0.00892297	1.1358	0.00892689	0.390396	-0.308701	0.757549	FALSE
PMR&COPD	COPD	Hypothyroid	1.14024	0.00892297	1.12877	0.00892836	1.01538	-0.800347	0.42351	FALSE
PMR&COPD	COPD	Hypertension	1.14024	0.00892297	1.09752	0.00893065	3.89194	-3.02439	0.00249138	TRUE
PMR&COPD	COPD	Obesity	1.14024	0.00892297	1.12534	0.00893178	1.32324	-1.04122	0.297774	FALSE
PMR&COPD	COPD	AF	1.14024	0.00892297	1.11148	0.00894549	2.58687	-2.02137	0.0432418	TRUE
PMR&COPD	COPD	Allergic Rhinitis	1.14024	0.00892297	1.1262	0.00892908	1.24632	-0.981213	0.326488	FALSE
PMR&COPD	COPD	Atopic Dermatitis	1.14024	0.00892297	1.13181	0.00892802	0.744214	-0.587408	0.55693	FALSE
PMR&COPD	COPD	Coronary Heart	1.14024	0.00892297	1.08512	0.00898428	5.07951	-3.91293	9.11819e-05	TRUE
PMR&COPD	COPD	Diabetes Type 2	1.14024	0.00892297	1.1228	0.00892972	1.55255	-1.22042	0.222307	FALSE
PMR&COPD	COPD	HF	1.14024	0.00892297	1.10094	0.00899807	3.56953	-2.76771	0.00564518	TRUE
PMR&COPD	COPD	Hyperthyroid	1.14024	0.00892297	1.1358	0.00892689	0.390396	-0.308701	0.757549	FALSE
PMR&COPD	COPD	Hypothyroid	1.14024	0.00892297	1.12877	0.00892836	1.01538	-0.800347	0.42351	FALSE
PMR&COPD	COPD	Hypertension	1.14024	0.00892297	1.09752	0.00893065	3.89194	-3.02439	0.00249138	TRUE
PMR&COPD	COPD	Obesity	1.14024	0.00892297	1.12534	0.00893178	1.32324	-1.04122	0.297774	FALSE
PMR&COPD	COPD	Asthma	1.14024	0.00892297	1.05236	0.00914837	8.35048	-6.27582	3.47791e-10	TRUE
psoriasis&asthma	asthma	Imd Quintile	1.27304	0.00420529	1.27257	0.00420577	0.0366493	-0.06161	0.950873	FALSE
psoriasis&asthma	asthma	LDL Category	1.27304	0.00420529	1.23389	0.00421416	3.17274	-5.24644	1.55064e-07	TRUE
psoriasis&asthma	asthma	HDL Category	1.27304	0.00420529	1.22449	0.00421544	3.96489	-6.53018	6.56901e-11	TRUE
psoriasis&asthma	asthma	Sbp Category	1.27304	0.00420529	1.21445	0.00421239	4.82398	-7.91511	2.47025e-15	TRUE
psoriasis&asthma	asthma	Dbp Category	1.27304	0.00420529	1.21563	0.00421207	4.72193	-7.75177	9.06188e-15	TRUE
psoriasis&asthma	asthma	Bmi Category	1.27304	0.00420529	1.18887	0.00422786	7.07939	-11.4705	1.85604e-30	TRUE
psoriasis&asthma	asthma	Totalcholesterol Category	1.27304	0.00420529	1.2212	0.00421566	4.24469	-6.98139	2.92276e-12	TRUE
psoriasis&asthma	asthma	Smoking Status Final	1.27304	0.00420529	1.18412	0.00422078	7.50937	-12.1528	5.54634e-34	TRUE
psoriasis&asthma	asthma	Pa Level	1.27304	0.00420529	1.24908	0.00421209	1.91799	-3.19192	0.0014133	TRUE
psoriasis&asthma	asthma	Triglyceride Category	1.27304	0.00420529	1.22722	0.00421585	3.73364	-6.1559	7.46521e-10	TRUE
psoriasis&asthma	asthma	Alcohol Consumption Level	1.27304	0.00420529	1.23581	0.00421134	3.0122	-4.98655	6.14666e-07	TRUE
psoriasis&asthma	asthma	Albumin Category	1.27304	0.00420529	1.20179	0.00421844	5.92844	-9.66906	4.08093e-22	TRUE
psoriasis&asthma	asthma	Ethnicity 16cat	1.27304	0.00420529	1.18316	0.00422473	7.59606	-12.2823	1.128e-34	TRUE
psoriasis&asthma	asthma	Region	1.27304	0.00420529	1.25812	0.0042096	1.18563	-1.98086	0.047607	TRUE
psoriasis&asthma	asthma	AF	1.27304	0.00420529	1.2702	0.0042064	0.223446	-0.37525	0.707475	FALSE
psoriasis&asthma	asthma	Allergic Rhinitis	1.27304	0.00420529	1.21789	0.00430053	4.52836	-7.36309	1.79697e-13	TRUE
psoriasis&asthma	asthma	Atopic Dermatitis	1.27304	0.00420529	1.22058	0.00422866	4.29777	-7.05596	1.7141e-12	TRUE
psoriasis&asthma	asthma	Coronary Heart	1.27304	0.00420529	1.26268	0.00420888	0.819951	-1.37251	0.169903	FALSE
psoriasis&asthma	asthma	Diabetes Type 2	1.27304	0.00420529	1.26009	0.00420966	1.02743	-1.71788	0.0858181	FALSE
psoriasis&asthma	asthma	HF	1.27304	0.00420529	1.26939	0.00420756	0.28739	-0.482414	0.629512	FALSE
psoriasis&asthma	asthma	Hyperthyroid	1.27304	0.00420529	1.27243	0.00420556	0.0479108	-0.0805386	0.935809	FALSE
psoriasis&asthma	asthma	Hypothyroid	1.27304	0.00420529	1.26781	0.00420722	0.411966	-0.691126	0.489486	FALSE
psoriasis&asthma	asthma	Hypertension	1.27304	0.00420529	1.25158	0.00421141	1.71398	-2.85551	0.00429684	TRUE
psoriasis&asthma	asthma	Obesity	1.27304	0.00420529	1.23718	0.00422471	2.89849	-4.79335	1.64017e-06	TRUE
psoriasis&asthma	asthma	AF	1.27304	0.00420529	1.2702	0.0042064	0.223446	-0.37525	0.707475	FALSE
psoriasis&asthma	asthma	Allergic Rhinitis	1.27304	0.00420529	1.21789	0.00430053	4.52836	-7.36309	1.79697e-13	TRUE
psoriasis&asthma	asthma	Atopic Dermatitis	1.27304	0.00420529	1.22058	0.00422866	4.29777	-7.05596	1.7141e-12	TRUE
psoriasis&asthma	asthma	Coronary Heart	1.27304	0.00420529	1.26268	0.00420888	0.819951	-1.37251	0.169903	FALSE
psoriasis&asthma	asthma	Diabetes Type 2	1.27304	0.00420529	1.26009	0.00420966	1.02743	-1.71788	0.0858181	FALSE
psoriasis&asthma	asthma	HF	1.27304	0.00420529	1.26939	0.00420756	0.28739	-0.482414	0.629512	FALSE
psoriasis&asthma	asthma	Hyperthyroid	1.27304	0.00420529	1.27243	0.00420556	0.0479108	-0.0805386	0.935809	FALSE
psoriasis&asthma	asthma	Hypothyroid	1.27304	0.00420529	1.26781	0.00420722	0.411966	-0.691126	0.489486	FALSE
psoriasis&asthma	asthma	Hypertension	1.27304	0.00420529	1.25158	0.00421141	1.71398	-2.85551	0.00429684	TRUE
psoriasis&asthma	asthma	Obesity	1.27304	0.00420529	1.23718	0.00422471	2.89849	-4.79335	1.64017e-06	TRUE
psoriasis&asthma	asthma	Asthma	1.27304	0.00420529	1.27304	0.00420529	0	0	1	FALSE
psoriasis&COPD	COPD	Imd Quintile	1.67035	0.00590755	1.68626	0.00594586	-0.943669	1.13122	0.257963	FALSE
psoriasis&COPD	COPD	LDL Category	1.67035	0.00590755	1.56425	0.00594104	6.78294	-7.83313	4.75862e-15	TRUE
psoriasis&COPD	COPD	HDL Category	1.67035	0.00590755	1.5464	0.00593023	8.01522	-9.21106	3.22935e-20	TRUE
psoriasis&COPD	COPD	Sbp Category	1.67035	0.00590755	1.55683	0.00592904	7.29138	-8.40863	4.14826e-17	TRUE
psoriasis&COPD	COPD	Dbp Category	1.67035	0.00590755	1.55035	0.00593091	7.7401	-8.90586	5.29714e-19	TRUE
psoriasis&COPD	COPD	Bmi Category	1.67035	0.00590755	1.53576	0.00596911	8.76401	-10.0034	1.47264e-23	TRUE
psoriasis&COPD	COPD	Totalcholesterol Category	1.67035	0.00590755	1.53642	0.00593456	8.71733	-9.98142	1.83822e-23	TRUE
psoriasis&COPD	COPD	Smoking Status Final	1.67035	0.00590755	1.43612	0.00602572	16.3097	-17.9044	1.09008e-71	TRUE
psoriasis&COPD	COPD	Pa Level	1.67035	0.00590755	1.59184	0.00595571	4.93201	-5.73898	9.52471e-09	TRUE
psoriasis&COPD	COPD	Triglyceride Category	1.67035	0.00590755	1.55329	0.00593097	7.53601	-8.67932	3.98152e-18	TRUE
psoriasis&COPD	COPD	Alcohol Consumption Level	1.67035	0.00590755	1.58039	0.00593288	5.69208	-6.61212	3.78852e-11	TRUE
psoriasis&COPD	COPD	Albumin Category	1.67035	0.00590755	1.51479	0.00593313	10.2697	-11.676	1.69035e-31	TRUE
psoriasis&COPD	COPD	Ethnicity 16cat	1.67035	0.00590755	1.5212	0.00592737	9.80505	-11.1771	5.27818e-29	TRUE
psoriasis&COPD	COPD	Region	1.67035	0.00590755	1.64639	0.00591841	1.4551	-1.72755	0.0840692	FALSE
psoriasis&COPD	COPD	AF	1.67035	0.00590755	1.6587	0.00591794	0.702285	-0.836928	0.402633	FALSE
psoriasis&COPD	COPD	Allergic Rhinitis	1.67035	0.00590755	1.65356	0.00591301	1.01527	-1.20855	0.226837	FALSE
psoriasis&COPD	COPD	Atopic Dermatitis	1.67035	0.00590755	1.64216	0.00592105	1.71633	-2.03461	0.0418903	TRUE
psoriasis&COPD	COPD	Coronary Heart	1.67035	0.00590755	1.62731	0.00594234	2.64503	-3.11564	0.00183544	TRUE
psoriasis&COPD	COPD	Diabetes Type 2	1.67035	0.00590755	1.64273	0.00591785	1.68144	-1.99413	0.046138	TRUE
psoriasis&COPD	COPD	HF	1.67035	0.00590755	1.6544	0.00593823	0.963785	-1.14511	0.252166	FALSE
psoriasis&COPD	COPD	Hyperthyroid	1.67035	0.00590755	1.668	0.00590945	0.14075	-0.168326	0.866327	FALSE
psoriasis&COPD	COPD	Hypothyroid	1.67035	0.00590755	1.66362	0.00590992	0.404724	-0.483362	0.628839	FALSE
psoriasis&COPD	COPD	Hypertension	1.67035	0.00590755	1.62508	0.00592134	2.78583	-3.28508	0.00101955	TRUE
psoriasis&COPD	COPD	Obesity	1.67035	0.00590755	1.62795	0.00592154	2.6043	-3.07369	0.0021143	TRUE
psoriasis&COPD	COPD	AF	1.67035	0.00590755	1.6587	0.00591794	0.702285	-0.836928	0.402633	FALSE
psoriasis&COPD	COPD	Allergic Rhinitis	1.67035	0.00590755	1.65356	0.00591301	1.01527	-1.20855	0.226837	FALSE
psoriasis&COPD	COPD	Atopic Dermatitis	1.67035	0.00590755	1.64216	0.00592105	1.71633	-2.03461	0.0418903	TRUE
psoriasis&COPD	COPD	Coronary Heart	1.67035	0.00590755	1.62731	0.00594234	2.64503	-3.11564	0.00183544	TRUE
psoriasis&COPD	COPD	Diabetes Type 2	1.67035	0.00590755	1.64273	0.00591785	1.68144	-1.99413	0.046138	TRUE
psoriasis&COPD	COPD	HF	1.67035	0.00590755	1.6544	0.00593823	0.963785	-1.14511	0.252166	FALSE
psoriasis&COPD	COPD	Hyperthyroid	1.67035	0.00590755	1.668	0.00590945	0.14075	-0.168326	0.866327	FALSE
psoriasis&COPD	COPD	Hypothyroid	1.67035	0.00590755	1.66362	0.00590992	0.404724	-0.483362	0.628839	FALSE
psoriasis&COPD	COPD	Hypertension	1.67035	0.00590755	1.62508	0.00592134	2.78583	-3.28508	0.00101955	TRUE
psoriasis&COPD	COPD	Obesity	1.67035	0.00590755	1.62795	0.00592154	2.6043	-3.07369	0.0021143	TRUE
psoriasis&COPD	COPD	Asthma	1.67035	0.00590755	1.60424	0.00603783	4.12063	-4.7803	1.75033e-06	TRUE
RA&asthma	asthma	Imd Quintile	1.47623	0.00705583	1.47309	0.00705701	0.212981	-0.213196	0.831174	FALSE
RA&asthma	asthma	LDL Category	1.47623	0.00705583	1.42299	0.00707101	3.74145	-3.67713	0.000235869	TRUE
RA&asthma	asthma	HDL Category	1.47623	0.00705583	1.40912	0.00707014	4.76187	-4.65729	3.20397e-06	TRUE
RA&asthma	asthma	Sbp Category	1.47623	0.00705583	1.41554	0.00706189	4.28691	-4.20482	2.61288e-05	TRUE
RA&asthma	asthma	Dbp Category	1.47623	0.00705583	1.41529	0.00706129	4.30558	-4.22294	2.41137e-05	TRUE
RA&asthma	asthma	Bmi Category	1.47623	0.00705583	1.37914	0.0070904	7.03923	-6.80054	1.0423e-11	TRUE
RA&asthma	asthma	Totalcholesterol Category	1.47623	0.00705583	1.40315	0.00707056	5.20802	-5.08259	3.72316e-07	TRUE
RA&asthma	asthma	Smoking Status Final	1.47623	0.00705583	1.3864	0.00708003	6.47908	-6.28061	3.37243e-10	TRUE
RA&asthma	asthma	Pa Level	1.47623	0.00705583	1.43439	0.00707087	2.91675	-2.87816	0.004	TRUE
RA&asthma	asthma	Triglyceride Category	1.47623	0.00705583	1.418	0.00707103	4.10614	-4.02842	5.61522e-05	TRUE
RA&asthma	asthma	Alcohol Consumption Level	1.47623	0.00705583	1.43512	0.00706479	2.86399	-2.82805	0.00468329	TRUE
RA&asthma	asthma	Albumin Category	1.47623	0.00705583	1.35948	0.00707124	8.58756	-8.24745	1.61812e-16	TRUE
RA&asthma	asthma	Ethnicity 16cat	1.47623	0.00705583	1.40122	0.00707618	5.35273	-5.21811	1.80756e-07	TRUE
RA&asthma	asthma	Region	1.47623	0.00705583	1.47061	0.00706084	0.38174	-0.381701	0.702683	FALSE
RA&asthma	asthma	AF	1.47623	0.00705583	1.46917	0.00705881	0.479972	-0.479757	0.6314	FALSE
RA&asthma	asthma	Allergic Rhinitis	1.47623	0.00705583	1.43571	0.00722207	2.82196	-2.75623	0.0058472	TRUE
RA&asthma	asthma	Atopic Dermatitis	1.47623	0.00705583	1.46569	0.00707905	0.718568	-0.716365	0.473766	FALSE
RA&asthma	asthma	Coronary Heart	1.47623	0.00705583	1.45541	0.00706436	1.43055	-1.42263	0.154845	FALSE
RA&asthma	asthma	Diabetes Type 2	1.47623	0.00705583	1.46243	0.00706405	0.943604	-0.94066	0.346879	FALSE
RA&asthma	asthma	HF	1.47623	0.00705583	1.46191	0.00706306	0.979016	-0.975859	0.329134	FALSE
RA&asthma	asthma	Hyperthyroid	1.47623	0.00705583	1.47402	0.00705674	0.149956	-0.150157	0.88064	FALSE
RA&asthma	asthma	Hypothyroid	1.47623	0.00705583	1.46264	0.0070617	0.928553	-0.925879	0.354509	FALSE
RA&asthma	asthma	Hypertension	1.47623	0.00705583	1.44085	0.00706857	2.45526	-2.42865	0.0151553	TRUE
RA&asthma	asthma	Obesity	1.47623	0.00705583	1.44116	0.00709097	2.43338	-2.40345	0.0162413	TRUE
RA&asthma	asthma	AF	1.47623	0.00705583	1.46917	0.00705881	0.479972	-0.479757	0.6314	FALSE
RA&asthma	asthma	Allergic Rhinitis	1.47623	0.00705583	1.43571	0.00722207	2.82196	-2.75623	0.0058472	TRUE
RA&asthma	asthma	Atopic Dermatitis	1.47623	0.00705583	1.46569	0.00707905	0.718568	-0.716365	0.473766	FALSE
RA&asthma	asthma	Coronary Heart	1.47623	0.00705583	1.45541	0.00706436	1.43055	-1.42263	0.154845	FALSE
RA&asthma	asthma	Diabetes Type 2	1.47623	0.00705583	1.46243	0.00706405	0.943604	-0.94066	0.346879	FALSE
RA&asthma	asthma	HF	1.47623	0.00705583	1.46191	0.00706306	0.979016	-0.975859	0.329134	FALSE
RA&asthma	asthma	Hyperthyroid	1.47623	0.00705583	1.47402	0.00705674	0.149956	-0.150157	0.88064	FALSE
RA&asthma	asthma	Hypothyroid	1.47623	0.00705583	1.46264	0.0070617	0.928553	-0.925879	0.354509	FALSE
RA&asthma	asthma	Hypertension	1.47623	0.00705583	1.44085	0.00706857	2.45526	-2.42865	0.0151553	TRUE
RA&asthma	asthma	Obesity	1.47623	0.00705583	1.44116	0.00709097	2.43338	-2.40345	0.0162413	TRUE
RA&asthma	asthma	Asthma	1.47623	0.00705583	1.47623	0.00705583	0	0	1	FALSE
RA&COPD	COPD	Imd Quintile	2.07155	0.00853012	2.03546	0.00859639	1.77333	-1.45147	0.146648	FALSE
RA&COPD	COPD	LDL Category	2.07155	0.00853012	1.9325	0.00855447	7.19557	-5.75174	8.83274e-09	TRUE
RA&COPD	COPD	HDL Category	2.07155	0.00853012	1.91567	0.00853609	8.13735	-6.4828	9.00381e-11	TRUE
RA&COPD	COPD	Sbp Category	2.07155	0.00853012	1.92555	0.00855602	7.58244	-6.0494	1.45386e-09	TRUE
RA&COPD	COPD	Dbp Category	2.07155	0.00853012	1.91827	0.00855575	7.99083	-6.36311	1.97715e-10	TRUE
RA&COPD	COPD	Bmi Category	2.07155	0.00853012	1.87169	0.00863367	10.6785	-8.35961	6.29284e-17	TRUE
RA&COPD	COPD	Totalcholesterol Category	2.07155	0.00853012	1.88001	0.00854201	10.1881	-8.03682	9.21965e-16	TRUE
RA&COPD	COPD	Smoking Status Final	2.07155	0.00853012	1.84699	0.00876009	12.1584	-9.38424	6.3372e-21	TRUE
RA&COPD	COPD	Pa Level	2.07155	0.00853012	1.91178	0.00859385	8.35724	-6.62864	3.38784e-11	TRUE
RA&COPD	COPD	Triglyceride Category	2.07155	0.00853012	1.93791	0.00853752	6.89644	-5.52591	3.27775e-08	TRUE
RA&COPD	COPD	Alcohol Consumption Level	2.07155	0.00853012	1.97599	0.00855996	4.83642	-3.90839	9.29145e-05	TRUE
RA&COPD	COPD	Albumin Category	2.07155	0.00853012	1.80596	0.00854797	14.7062	-11.3617	6.48905e-30	TRUE
RA&COPD	COPD	Ethnicity 16cat	2.07155	0.00853012	1.92987	0.00855669	7.34158	-5.86365	4.52791e-09	TRUE
RA&COPD	COPD	Region	2.07155	0.00853012	2.04984	0.00854869	1.05927	-0.872516	0.382927	FALSE
RA&COPD	COPD	AF	2.07155	0.00853012	2.05017	0.00854895	1.0432	-0.859334	0.390156	FALSE
RA&COPD	COPD	Allergic Rhinitis	2.07155	0.00853012	2.05794	0.00853431	0.661408	-0.546337	0.584834	FALSE
RA&COPD	COPD	Atopic Dermatitis	2.07155	0.00853012	2.06438	0.00853357	0.347355	-0.287384	0.773818	FALSE
RA&COPD	COPD	Coronary Heart	2.07155	0.00853012	1.99871	0.00858734	3.64434	-2.9573	0.00310344	TRUE
RA&COPD	COPD	Diabetes Type 2	2.07155	0.00853012	2.04676	0.00853747	1.21118	-0.997553	0.318496	FALSE
RA&COPD	COPD	HF	2.07155	0.00853012	2.02198	0.00859607	2.45153	-1.99995	0.0455057	TRUE
RA&COPD	COPD	Hyperthyroid	2.07155	0.00853012	2.06381	0.00853472	0.375085	-0.310263	0.756361	FALSE
RA&COPD	COPD	Hypothyroid	2.07155	0.00853012	2.05847	0.0085329	0.635675	-0.525191	0.59945	FALSE
RA&COPD	COPD	Hypertension	2.07155	0.00853012	2.00881	0.00854107	3.12363	-2.54809	0.0108315	TRUE
RA&COPD	COPD	Obesity	2.07155	0.00853012	2.03452	0.00854185	1.82025	-1.49431	0.135095	FALSE
RA&COPD	COPD	AF	2.07155	0.00853012	2.05017	0.00854895	1.0432	-0.859334	0.390156	FALSE
RA&COPD	COPD	Allergic Rhinitis	2.07155	0.00853012	2.05794	0.00853431	0.661408	-0.546337	0.584834	FALSE
RA&COPD	COPD	Atopic Dermatitis	2.07155	0.00853012	2.06438	0.00853357	0.347355	-0.287384	0.773818	FALSE
RA&COPD	COPD	Coronary Heart	2.07155	0.00853012	1.99871	0.00858734	3.64434	-2.9573	0.00310344	TRUE
RA&COPD	COPD	Diabetes Type 2	2.07155	0.00853012	2.04676	0.00853747	1.21118	-0.997553	0.318496	FALSE
RA&COPD	COPD	HF	2.07155	0.00853012	2.02198	0.00859607	2.45153	-1.99995	0.0455057	TRUE
RA&COPD	COPD	Hyperthyroid	2.07155	0.00853012	2.06381	0.00853472	0.375085	-0.310263	0.756361	FALSE
RA&COPD	COPD	Hypothyroid	2.07155	0.00853012	2.05847	0.0085329	0.635675	-0.525191	0.59945	FALSE
RA&COPD	COPD	Hypertension	2.07155	0.00853012	2.00881	0.00854107	3.12363	-2.54809	0.0108315	TRUE
RA&COPD	COPD	Obesity	2.07155	0.00853012	2.03452	0.00854185	1.82025	-1.49431	0.135095	FALSE
RA&COPD	COPD	Asthma	2.07155	0.00853012	1.94065	0.00876608	6.7451	-5.33656	9.47281e-08	TRUE

## Sheet: S8
id.exposure	id.outcome	outcome	exposure	method	nsnp	b	se	p value	Q	Q_df	Q_pval	Fstat	analysis
psoriasis	COPD	COPD	psoriasis	Inverse variance weighted	65	0.012494778500173215	0.014496319014020305	0.388727	138.53039157010673	64	2.0360698875778764e-7	143.89203162477546	original
psoriasis	COPD	COPD	psoriasis	MR Egger	65	-0.044026	0.018741022334385873	0.0219637	108.58728657447756	63	3.173148520144262e-4	NA	original
psoriasis	COPD	COPD	psoriasis	Weighted median	65	-0.031154	0.0162039	0.0545274	NA	NA	NA	NA	original
psoriasis	COPD	COPD	psoriasis	Weighted mode	65	-0.0372711	0.015302463448238135	0.0176615	NA	NA	NA	NA	original
psoriasis	COPD	COPD	psoriasis	MR GRIP	65	-0.0241979	0.015787849616063422	0.130359	NA	NA	NA	NA	original
psoriasis	COPD	COPD	psoriasis	MR Egger Intercept	65	0.010259625153268188	0.00246151	9.54863e-05	NA	NA	NA	NA	original
psoriasis	COPD	COPD	psoriasis	Inverse variance weighted	64	0.00927518	0.013601989832666939	0.495303	119.39297812339692	63	2.3443329894559907e-5	143.89203162477546	radial
psoriasis	COPD	COPD	psoriasis	MR Egger	64	-0.0428243	0.017566612158060834	0.0176565	93.84494351357856	62	0.00559554	NA	radial
psoriasis	COPD	COPD	psoriasis	Weighted median	64	-0.0312026	0.016274032724193355	0.0551964	NA	NA	NA	NA	radial
psoriasis	COPD	COPD	psoriasis	Weighted mode	64	-0.0362816	0.015467688850728337	0.0221559	NA	NA	NA	NA	radial
psoriasis	COPD	COPD	psoriasis	MR GRIP	64	-0.024662	0.0147674	0.0999557	NA	NA	NA	NA	radial
psoriasis	COPD	COPD	psoriasis	MR Egger Intercept	64	0.0095259	0.00231866	0.000118862	NA	NA	NA	NA	radial
psoriasis	COPD	COPD	psoriasis	Inverse variance weighted	64	0.00927518	0.013601989832666939	0.495303	119.39297812339692	63	2.3443329894559907e-5	143.89203162477546	direction only steiger
psoriasis	COPD	COPD	psoriasis	MR Egger	64	-0.0428243	0.017566612158060834	0.0176565	93.84494351357856	62	0.00559554	NA	direction only steiger
psoriasis	COPD	COPD	psoriasis	Weighted median	64	-0.0312026	0.0161266	0.0530083	NA	NA	NA	NA	direction only steiger
psoriasis	COPD	COPD	psoriasis	Weighted mode	64	-0.0362816	0.016907708232507774	0.0357435	NA	NA	NA	NA	direction only steiger
psoriasis	COPD	COPD	psoriasis	MR GRIP	64	-0.024662	0.0147674	0.0999557	NA	NA	NA	NA	direction only steiger
psoriasis	COPD	COPD	psoriasis	MR Egger Intercept	64	0.0095259	0.00231866	0.000118862	NA	NA	NA	NA	direction only steiger
COPD	psoriasis	psoriasis	COPD	Inverse variance weighted	41	0.11432894789235827	0.0534666	0.0324903	72.18251911320289	40	0.00135883	37.570726196305785	original
COPD	psoriasis	psoriasis	COPD	MR Egger	41	0.28753616352700084	0.19118035936458275	0.140636	70.57084773405377	39	0.00145585	NA	original
COPD	psoriasis	psoriasis	COPD	Weighted median	41	0.11813595671093875	0.0663579	0.0750295	NA	NA	NA	NA	original
COPD	psoriasis	psoriasis	COPD	Weighted mode	41	0.14119051503850844	0.11386348247153252	0.222201	NA	NA	NA	NA	original
COPD	psoriasis	psoriasis	COPD	MR GRIP	41	0.236038	0.12737329682127288	0.0714428	NA	NA	NA	NA	original
COPD	psoriasis	psoriasis	COPD	MR Egger Intercept	41	-0.00920753	0.0097563	0.351107	NA	NA	NA	NA	original
COPD	psoriasis	psoriasis	COPD	Inverse variance weighted	41	0.11432894789235827	0.0534666	0.0324903	72.18251911320289	40	0.00135883	37.570726196305785	radial
COPD	psoriasis	psoriasis	COPD	MR Egger	41	0.28753616352700084	0.19118035936458275	0.140636	70.57084773405377	39	0.00145585	NA	radial
COPD	psoriasis	psoriasis	COPD	Weighted median	41	0.11813595671093875	0.0638557	0.0643071	NA	NA	NA	NA	radial
COPD	psoriasis	psoriasis	COPD	Weighted mode	41	0.14119051503850844	0.11380061469298869	0.221951	NA	NA	NA	NA	radial
COPD	psoriasis	psoriasis	COPD	MR GRIP	41	0.236038	0.12737329682127288	0.0714428	NA	NA	NA	NA	radial
COPD	psoriasis	psoriasis	COPD	MR Egger Intercept	41	-0.00920753	0.0097563	0.351107	NA	NA	NA	NA	radial
COPD	psoriasis	psoriasis	COPD	Inverse variance weighted	40	0.10752825657604316	0.0510337	0.0351171	63.8939	39	0.00719673	37.48996670022111	direction only steiger
COPD	psoriasis	psoriasis	COPD	MR Egger	40	0.2903211759296897	0.18168588843956562	0.118342	62.09841101053599	38	0.00809639	NA	direction only steiger
COPD	psoriasis	psoriasis	COPD	Weighted median	40	0.11695502765127952	0.0623203	0.0605626	NA	NA	NA	NA	direction only steiger
COPD	psoriasis	psoriasis	COPD	Weighted mode	40	0.14613817863747358	0.11652551461124236	0.21726	NA	NA	NA	NA	direction only steiger
COPD	psoriasis	psoriasis	COPD	MR GRIP	40	0.23416610451730605	0.12101992116372716	0.060467	NA	NA	NA	NA	direction only steiger
COPD	psoriasis	psoriasis	COPD	MR Egger Intercept	40	-0.00972119	0.00927431	0.301175	NA	NA	NA	NA	direction only steiger
RA	COPD	COPD	RA	Inverse variance weighted	60	0.0989652	0.0179358	3.4336e-08	112.9077063869521	59	3.0454309854503106e-5	89.96626370563156	original
RA	COPD	COPD	RA	MR Egger	60	0.0419985	0.0302642	0.170528	103.50526541939823	58	2.2392654928258475e-4	NA	original
RA	COPD	COPD	RA	Weighted median	60	0.0942915	0.019837149689351664	2.00146e-06	NA	NA	NA	NA	original
RA	COPD	COPD	RA	Weighted mode	60	0.090368	0.0207974	5.56378e-05	NA	NA	NA	NA	original
RA	COPD	COPD	RA	MR GRIP	60	0.0685308	0.022619719849058032	0.0036524	NA	NA	NA	NA	original
RA	COPD	COPD	RA	MR Egger Intercept	60	0.00733458	0.00319538	0.0253469	NA	NA	NA	NA	original
RA	COPD	COPD	RA	Inverse variance weighted	58	0.0880013	0.015290447283399374	8.64818e-09	77.69586460330405	57	0.035586559567344904	89.96626370563156	radial
RA	COPD	COPD	RA	MR Egger	58	0.0442554	0.025714350553063606	0.0907649	72.101	56	0.072463	NA	radial
RA	COPD	COPD	RA	Weighted median	58	0.0929116	0.019524158405543644	1.94744e-06	NA	NA	NA	NA	radial
RA	COPD	COPD	RA	Weighted mode	58	0.0902538	0.0221025	0.000140057	NA	NA	NA	NA	radial
RA	COPD	COPD	RA	MR GRIP	58	0.0630955	0.019134521779252383	0.00169823	NA	NA	NA	NA	radial
RA	COPD	COPD	RA	MR Egger Intercept	58	0.00570062	0.00273467	0.0416803	NA	NA	NA	NA	radial
RA	COPD	COPD	RA	Inverse variance weighted	58	0.0880013	0.015290447283399374	8.64818e-09	77.69586460330405	57	0.035586559567344904	89.96626370563156	direction only steiger
RA	COPD	COPD	RA	MR Egger	58	0.0442554	0.025714350553063606	0.0907649	72.101	56	0.072463	NA	direction only steiger
RA	COPD	COPD	RA	Weighted median	58	0.0929116	0.021287442419471173	1.27343e-05	NA	NA	NA	NA	direction only steiger
RA	COPD	COPD	RA	Weighted mode	58	0.0902538	0.0234091	0.000295956	NA	NA	NA	NA	direction only steiger
RA	COPD	COPD	RA	MR GRIP	58	0.0630955	0.019134521779252383	0.00169823	NA	NA	NA	NA	direction only steiger
RA	COPD	COPD	RA	MR Egger Intercept	58	0.00570062	0.00273467	0.0416803	NA	NA	NA	NA	direction only steiger
COPD	RA	RA	COPD	Inverse variance weighted	41	0.3921445209590193	0.16340892510693494	0.0164052	1019.9025460425814	40	8.042343011820691e-188	37.570726196305785	original
COPD	RA	RA	COPD	MR Egger	41	0.0150109	0.6681502074839762	0.98219	1011.107751637927	39	1.0807740593418981e-186	NA	original
COPD	RA	RA	COPD	Weighted median	41	0.1744959134306151	0.0553005	0.00160271	NA	NA	NA	NA	original
COPD	RA	RA	COPD	Weighted mode	41	0.10782465328486024	0.082167	0.196913	NA	NA	NA	NA	original
COPD	RA	RA	COPD	MR GRIP	41	0.18686863316449595	0.43768057439450697	0.671762	NA	NA	NA	NA	original
COPD	RA	RA	COPD	MR Egger Intercept	41	0.0194855	0.033455238503948874	0.563627	NA	NA	NA	NA	original
COPD	RA	RA	COPD	Inverse variance weighted	39	0.2618823883381335	0.047174830147671154	2.83527e-08	76.821	38	1.9544802100881372e-4	37.570726196305785	radial
COPD	RA	RA	COPD	MR Egger	39	0.090195	0.18716133918096606	0.632708	74.99923680287334	37	2.1922381055324464e-4	NA	radial
COPD	RA	RA	COPD	Weighted median	39	0.18241439237900892	0.054174	0.000759373	NA	NA	NA	NA	radial
COPD	RA	RA	COPD	Weighted mode	39	0.11327046097654347	0.0890347	0.21103	NA	NA	NA	NA	radial
COPD	RA	RA	COPD	MR GRIP	39	0.1658779238363754	0.12326558009576377	0.18659	NA	NA	NA	NA	radial
COPD	RA	RA	COPD	MR Egger Intercept	39	0.00888126	0.00936828	0.349273	NA	NA	NA	NA	radial
COPD	RA	RA	COPD	Inverse variance weighted	39	0.2618823883381335	0.047174830147671154	2.83527e-08	76.821	38	1.9544802100881372e-4	37.48996670022111	direction only steiger
COPD	RA	RA	COPD	MR Egger	39	0.090195	0.18716133918096606	0.632708	74.99923680287334	37	2.1922381055324464e-4	NA	direction only steiger
COPD	RA	RA	COPD	Weighted median	39	0.18241439237900892	0.0540958	0.000746071	NA	NA	NA	NA	direction only steiger
COPD	RA	RA	COPD	Weighted mode	39	0.11327046097654347	0.0898338	0.215036	NA	NA	NA	NA	direction only steiger
COPD	RA	RA	COPD	MR GRIP	39	0.1658779238363754	0.12326558009576377	0.18659	NA	NA	NA	NA	direction only steiger
COPD	RA	RA	COPD	MR Egger Intercept	39	0.00888126	0.00936828	0.349273	NA	NA	NA	NA	direction only steiger
PMR	COPD	COPD	PMR	Inverse variance weighted	10	0.0721207	0.022226810538322456	0.0011755	12.639693970416882	9	0.1795988223826725	130.8999274969057	original
PMR	COPD	COPD	PMR	MR Egger	10	0.079681	0.0352686	0.0537846	12.510848699678522	8	0.12982487050334973	NA	original
PMR	COPD	COPD	PMR	Weighted median	10	0.042311800111240576	0.0291997	0.147324	NA	NA	NA	NA	original
PMR	COPD	COPD	PMR	Weighted mode	10	0.030300189797866722	0.042810731660121094	0.497006	NA	NA	NA	NA	original
PMR	COPD	COPD	PMR	MR GRIP	10	0.0762068	0.0284075	0.0278123	NA	NA	NA	NA	original
PMR	COPD	COPD	PMR	MR Egger Intercept	10	-0.00281532	0.00980825	0.781379	NA	NA	NA	NA	original
PMR	COPD	COPD	PMR	Inverse variance weighted	10	0.0721207	0.022226810538322456	0.0011755	12.639693970416882	9	0.1795988223826725	130.8999274969057	radial
PMR	COPD	COPD	PMR	MR Egger	10	0.079681	0.0352686	0.0537846	12.510848699678522	8	0.12982487050334973	NA	radial
PMR	COPD	COPD	PMR	Weighted median	10	0.042311800111240576	0.0291729	0.146953	NA	NA	NA	NA	radial
PMR	COPD	COPD	PMR	Weighted mode	10	0.030300189797866722	0.0417661	0.486596	NA	NA	NA	NA	radial
PMR	COPD	COPD	PMR	MR GRIP	10	0.0762068	0.0284075	0.0278123	NA	NA	NA	NA	radial
PMR	COPD	COPD	PMR	MR Egger Intercept	10	-0.00281532	0.00980825	0.781379	NA	NA	NA	NA	radial
PMR	COPD	COPD	PMR	Inverse variance weighted	10	0.0721207	0.022226810538322456	0.0011755	12.639693970416882	9	0.1795988223826725	130.8999274969057	direction only steiger
PMR	COPD	COPD	PMR	MR Egger	10	0.079681	0.0352686	0.0537846	12.510848699678522	8	0.12982487050334973	NA	direction only steiger
PMR	COPD	COPD	PMR	Weighted median	10	0.042311800111240576	0.029136250754591173	0.146445	NA	NA	NA	NA	direction only steiger
PMR	COPD	COPD	PMR	Weighted mode	10	0.030300189797866722	0.0423586	0.492546	NA	NA	NA	NA	direction only steiger
PMR	COPD	COPD	PMR	MR GRIP	10	0.0762068	0.0284075	0.0278123	NA	NA	NA	NA	direction only steiger
PMR	COPD	COPD	PMR	MR Egger Intercept	10	-0.00281532	0.00980825	0.781379	NA	NA	NA	NA	direction only steiger
COPD	PMR	PMR	COPD	Inverse variance weighted	41	0.30284716235402587	0.10561514640210712	0.00413782	92.74343254609784	40	4.507159893205245e-6	37.570726196305785	original
COPD	PMR	PMR	COPD	MR Egger	41	0.3817286496539932	0.4401109829521323	0.391058	92.66232141755857	39	2.92765056518204e-6	NA	original
COPD	PMR	PMR	COPD	Weighted median	41	0.24310526757688788	0.10113442640095957	0.0162264	NA	NA	NA	NA	original
COPD	PMR	PMR	COPD	Weighted mode	41	0.3262610484985722	0.19600669652929248	0.10382	NA	NA	NA	NA	original
COPD	PMR	PMR	COPD	MR GRIP	41	0.3397253817594016	0.2875656130928186	0.244604	NA	NA	NA	NA	original
COPD	PMR	PMR	COPD	MR Egger Intercept	41	-0.00407024	0.022029213540160415	0.85437	NA	NA	NA	NA	original
COPD	PMR	PMR	COPD	Inverse variance weighted	39	0.18478143489824386	0.0716336	0.00989333	38.47402773786363	38	0.4480308827087001	37.570726196305785	radial
COPD	PMR	PMR	COPD	MR Egger	39	0.49520450408405753	0.2869503378411279	0.0927361	37.21910551790227	37	0.4589897698865032	NA	radial
COPD	PMR	PMR	COPD	Weighted median	39	0.22909402112452548	0.108044	0.0339742	NA	NA	NA	NA	radial
COPD	PMR	PMR	COPD	Weighted mode	39	0.3028524910383703	0.1971258086313282	0.13274	NA	NA	NA	NA	radial
COPD	PMR	PMR	COPD	MR GRIP	39	0.35872350161911903	0.18786113607745364	0.0639729	NA	NA	NA	NA	radial
COPD	PMR	PMR	COPD	MR Egger Intercept	39	-0.0161238	0.014435803629660262	0.271225	NA	NA	NA	NA	radial
COPD	PMR	PMR	COPD	Inverse variance weighted	39	0.18478143489824386	0.0716336	0.00989333	38.47402773786363	38	0.4480308827087001	37.498161005567304	direction only steiger
COPD	PMR	PMR	COPD	MR Egger	39	0.49520450408405753	0.2869503378411279	0.0927361	37.21910551790227	37	0.4589897698865032	NA	direction only steiger
COPD	PMR	PMR	COPD	Weighted median	39	0.22909402112452548	0.10736295647528006	0.0328569	NA	NA	NA	NA	direction only steiger
COPD	PMR	PMR	COPD	Weighted mode	39	0.3028524910383703	0.208764	0.155071	NA	NA	NA	NA	direction only steiger
COPD	PMR	PMR	COPD	MR GRIP	39	0.35872350161911903	0.18786113607745364	0.0639729	NA	NA	NA	NA	direction only steiger
COPD	PMR	PMR	COPD	MR Egger Intercept	39	-0.0161238	0.014435803629660262	0.271225	NA	NA	NA	NA	direction only steiger
OA	COPD	COPD	OA	Inverse variance weighted	129	0.42213487964653157	0.0497808	2.25434e-17	337.3202651248133	128	9.059597992750885e-21	39.13019254326185	original
OA	COPD	COPD	OA	MR Egger	129	0.24038768920863435	0.20222686541397458	0.236775	335.05173642050346	127	1.1304579701138356e-20	NA	original
OA	COPD	COPD	OA	Weighted median	129	0.3062228007729002	0.051341646441500036	2.45515e-09	NA	NA	NA	NA	original
OA	COPD	COPD	OA	Weighted mode	129	0.29357915062357076	0.13860921770332751	0.0361056	NA	NA	NA	NA	original
OA	COPD	COPD	OA	MR GRIP	129	0.3012482792864162	0.12204604097373957	0.014905	NA	NA	NA	NA	original
OA	COPD	COPD	OA	MR Egger Intercept	129	0.00509736	0.00549701	0.355532	NA	NA	NA	NA	original
OA	COPD	COPD	OA	Inverse variance weighted	124	0.37977620858800265	0.0440929	7.11135e-18	245.14515117299425	123	3.911658223113877e-10	39.13019254326185	radial
OA	COPD	COPD	OA	MR Egger	124	0.2803251040890964	0.17867101718344716	0.119251	244.48378130924854	122	3.2425466938055806e-10	NA	radial
OA	COPD	COPD	OA	Weighted median	124	0.2988222005116143	0.0519159	8.6187e-09	NA	NA	NA	NA	radial
OA	COPD	COPD	OA	Weighted mode	124	0.30079122092335053	0.14888690187623524	0.0455279	NA	NA	NA	NA	radial
OA	COPD	COPD	OA	MR GRIP	124	0.3107386094121211	0.10800078977485852	0.00473788	NA	NA	NA	NA	radial
OA	COPD	COPD	OA	MR Egger Intercept	124	0.00280221	0.00487779	0.566699	NA	NA	NA	NA	radial
OA	COPD	COPD	OA	Inverse variance weighted	106	0.24339773292812114	0.0364859	2.54064e-11	123.29338562314278	105	0.10728479263075379	39.945345745756256	direction only steiger
OA	COPD	COPD	OA	MR Egger	106	0.39397361924238933	0.14329835000501198	0.00704316	121.90953234638748	104	0.11075188062846938	NA	direction only steiger
OA	COPD	COPD	OA	Weighted median	106	0.2560594102730283	0.051248283786540894	5.83958e-07	NA	NA	NA	NA	direction only steiger
OA	COPD	COPD	OA	Weighted mode	106	0.3262608812550525	0.14384317141907985	0.0253653	NA	NA	NA	NA	direction only steiger
OA	COPD	COPD	OA	MR GRIP	106	0.31711196271457104	0.0863952	0.000384018	NA	NA	NA	NA	direction only steiger
OA	COPD	COPD	OA	MR Egger Intercept	106	-0.00431204	0.00396862	0.279755	NA	NA	NA	NA	direction only steiger
COPD	OA	OA	COPD	Inverse variance weighted	41	0.12709923647937707	0.0318987	6.76315e-05	205.57629249022563	40	3.882555887801569e-24	37.570726196305785	original
COPD	OA	OA	COPD	MR Egger	41	-0.119467	0.1379481436786932	0.391772	189.24941850358115	39	1.2923250953376657e-21	NA	original
COPD	OA	OA	COPD	Weighted median	41	0.0834405	0.027089247060675822	0.00206857	NA	NA	NA	NA	original
COPD	OA	OA	COPD	Weighted mode	41	0.0646394	0.0492627	0.196954	NA	NA	NA	NA	original
COPD	OA	OA	COPD	MR GRIP	41	-0.0124519	0.0910359	0.891908	NA	NA	NA	NA	original
COPD	OA	OA	COPD	MR Egger Intercept	41	0.012451381888874253	0.00678814	0.0742496	NA	NA	NA	NA	original
COPD	OA	OA	COPD	Inverse variance weighted	35	0.13321402182038838	0.023651200260545985	1.77675e-08	78.17765918133567	34	2.4742801188749528e-5	37.570726196305785	radial
COPD	OA	OA	COPD	MR Egger	35	0.023978860729518568	0.12796665028118653	0.852507	76.42987890460395	33	2.6759118867713194e-5	NA	radial
COPD	OA	OA	COPD	Weighted median	35	0.10526597726657634	0.026397	6.66904e-05	NA	NA	NA	NA	radial
COPD	OA	OA	COPD	Weighted mode	35	0.062264772978971705	0.0513747	0.233878	NA	NA	NA	NA	radial
COPD	OA	OA	COPD	MR GRIP	35	0.0704475	0.0801237	0.385632	NA	NA	NA	NA	radial
COPD	OA	OA	COPD	MR Egger Intercept	35	0.00537726	0.00619002	0.391287	NA	NA	NA	NA	radial
COPD	OA	OA	COPD	Inverse variance weighted	35	0.13321402182038838	0.023651200260545985	1.77675e-08	78.17765918133567	34	2.4742801188749528e-5	37.570726196305785	direction only steiger
COPD	OA	OA	COPD	MR Egger	35	0.023978860729518568	0.12796665028118653	0.852507	76.42987890460395	33	2.6759118867713194e-5	NA	direction only steiger
COPD	OA	OA	COPD	Weighted median	35	0.10526597726657634	0.026791261434657695	8.52587e-05	NA	NA	NA	NA	direction only steiger
COPD	OA	OA	COPD	Weighted mode	35	0.062264772978971705	0.0535064	0.252652	NA	NA	NA	NA	direction only steiger
COPD	OA	OA	COPD	MR GRIP	35	0.0704475	0.0801237	0.385632	NA	NA	NA	NA	direction only steiger
COPD	OA	OA	COPD	MR Egger Intercept	35	0.00537726	0.00619002	0.391287	NA	NA	NA	NA	direction only steiger
psoriasis	asthma	asthma	psoriasis	Inverse variance weighted	65	0.00253449	0.0294844	0.902152	450.81610974219313	64	1.57565e-59	143.89203162477546	original
psoriasis	asthma	asthma	psoriasis	MR Egger	65	-0.0550117	0.0153916	0.0667275	406.3365941157438	63	1.1411723965014232e-51	NA	original
psoriasis	asthma	asthma	psoriasis	Weighted median	65	0.0121439	0.0419364	0.430113	NA	NA	NA	NA	original
psoriasis	asthma	asthma	psoriasis	Weighted mode	65	0.0378028	0.0246655	0.370739	NA	NA	NA	NA	original
psoriasis	asthma	asthma	psoriasis	MR GRIP	65	-0.0367637	0.0035566	0.141085	NA	NA	NA	NA	original
psoriasis	asthma	asthma	psoriasis	MR Egger Intercept	65	0.00933991	0.0128948	0.0108299	NA	NA	NA	NA	original
psoriasis	asthma	asthma	psoriasis	Inverse variance weighted	54	0.0272743	0.0189913	0.034418	107.55858079316316	53	1.3981713912705769e-5	143.89203162477546	radial
psoriasis	asthma	asthma	psoriasis	MR Egger	54	-0.0119067	0.0144249	0.533431	94.40676370667519	52	2.9348131456507457e-4	NA	radial
psoriasis	asthma	asthma	psoriasis	Weighted median	54	0.0432505	0.0213278	0.00271473	NA	NA	NA	NA	radial
psoriasis	asthma	asthma	psoriasis	Weighted mode	54	0.0437288	0.0159981	0.0452935	NA	NA	NA	NA	radial
psoriasis	asthma	asthma	psoriasis	MR GRIP	54	0.00427219	0.00220793	0.790492	NA	NA	NA	NA	radial
psoriasis	asthma	asthma	psoriasis	MR Egger Intercept	54	0.00594262	0.013434	0.0095455	NA	NA	NA	NA	radial
psoriasis	asthma	asthma	psoriasis	Inverse variance weighted	50	0.0284308	0.0197265	0.0343164	105.01338734350752	49	5.865398347168517e-6	131.88573463735895	direction only steiger
psoriasis	asthma	asthma	psoriasis	MR Egger	50	-0.00993993	0.0150496	0.616647	92.50532099075912	48	1.2057963906623247e-4	NA	direction only steiger
psoriasis	asthma	asthma	psoriasis	Weighted median	50	0.042583	0.0207486	0.0046619	NA	NA	NA	NA	direction only steiger
psoriasis	asthma	asthma	psoriasis	Weighted mode	50	0.0445012	0.0166248	0.0369548	NA	NA	NA	NA	direction only steiger
psoriasis	asthma	asthma	psoriasis	MR GRIP	50	0.00609049	0.00230375	0.715715	NA	NA	NA	NA	direction only steiger
psoriasis	asthma	asthma	psoriasis	MR Egger Intercept	50	0.00586905	0.0458141	0.0141044	NA	NA	NA	NA	direction only steiger
asthma	psoriasis	psoriasis	asthma	Inverse variance weighted	161	0.041258	0.109395	0.367826	684.4091871399146	160	5.660812454314395e-66	62.96238947402547	original
asthma	psoriasis	psoriasis	asthma	MR Egger	161	0.0458356	0.0427593	0.675787	684.4000350171345	159	2.7286663743988136e-66	NA	original
asthma	psoriasis	psoriasis	asthma	Weighted median	161	0.0751515	0.0656366	0.0788246	NA	NA	NA	NA	original
asthma	psoriasis	psoriasis	asthma	Weighted mode	161	0.0769285	0.0727077	0.242925	NA	NA	NA	NA	original
asthma	psoriasis	psoriasis	asthma	MR GRIP	161	0.0265798	0.00525269	0.715171	NA	NA	NA	NA	original
asthma	psoriasis	psoriasis	asthma	MR Egger Intercept	161	-0.000242207	0.0346011	0.96328	NA	NA	NA	NA	original
asthma	psoriasis	psoriasis	asthma	Inverse variance weighted	148	0.121223	0.0803405	0.000459274	314.8805782909345	147	2.89316216909746e-14	62.96238947402547	radial
asthma	psoriasis	psoriasis	asthma	MR Egger	148	0.16116	0.040487	0.0467078	314.2269460925253	146	2.338557390798821e-14	NA	radial
asthma	psoriasis	psoriasis	asthma	Weighted median	148	0.0795512	0.0668699	0.0494306	NA	NA	NA	NA	radial
asthma	psoriasis	psoriasis	asthma	Weighted mode	148	0.0758682	0.0547889	0.258405	NA	NA	NA	NA	radial
asthma	psoriasis	psoriasis	asthma	MR GRIP	148	0.143184	0.00377882	0.00990409	NA	NA	NA	NA	radial
asthma	psoriasis	psoriasis	asthma	MR Egger Intercept	148	-0.00208247	0.0315202	0.582415	NA	NA	NA	NA	radial
asthma	psoriasis	psoriasis	asthma	Inverse variance weighted	120	0.0770138	0.0779612	0.014553	163.7216598097384	119	0.00413152	61.494064329131064	direction only steiger
asthma	psoriasis	psoriasis	asthma	MR Egger	120	0.161076	0.0435276	0.0410077	161.81697576831831	118	0.00462819	NA	direction only steiger
asthma	psoriasis	psoriasis	asthma	Weighted median	120	0.0708347	0.062514	0.103662	NA	NA	NA	NA	direction only steiger
asthma	psoriasis	psoriasis	asthma	Weighted mode	120	0.066015	0.0526995	0.293106	NA	NA	NA	NA	direction only steiger
asthma	psoriasis	psoriasis	asthma	MR GRIP	120	0.126471	0.00347627	0.0179657	NA	NA	NA	NA	direction only steiger
asthma	psoriasis	psoriasis	asthma	MR Egger Intercept	120	-0.00409689	0.0236583	0.240957	NA	NA	NA	NA	direction only steiger
RA	asthma	asthma	RA	Inverse variance weighted	58	0.109531	0.0499634	3.6622e-06	289.2679519566651	57	8.429634067647819e-33	87.10756285063974	original
RA	asthma	asthma	RA	MR Egger	58	0.089908	0.0205735	0.0773314	288.24034830417645	56	5.587869409631515e-33	NA	original
RA	asthma	asthma	RA	Weighted median	58	0.0843717	0.028378	4.11376e-05	NA	NA	NA	NA	original
RA	asthma	asthma	RA	Weighted mode	58	0.0670243	0.0364749	0.0216236	NA	NA	NA	NA	original
RA	asthma	asthma	RA	MR GRIP	58	0.094963	0.00437909	0.0117905	NA	NA	NA	NA	original
RA	asthma	asthma	RA	MR Egger Intercept	58	0.00195665	0.0165229	0.656731	NA	NA	NA	NA	original
RA	asthma	asthma	RA	Inverse variance weighted	49	0.110221	0.0331807	2.54396e-11	101.68016944344348	48	1.0019568376934533e-5	87.10756285063974	radial
RA	asthma	asthma	RA	MR Egger	49	0.107699	0.0202608	0.00216155	101.66343471724768	47	6.697435783962651e-6	NA	radial
RA	asthma	asthma	RA	Weighted median	49	0.0926172	0.0335841	4.84804e-06	NA	NA	NA	NA	radial
RA	asthma	asthma	RA	Weighted mode	49	0.0617456	0.0244054	0.0721748	NA	NA	NA	NA	radial
RA	asthma	asthma	RA	MR GRIP	49	0.108693	0.00302399	5.18911e-05	NA	NA	NA	NA	radial
RA	asthma	asthma	RA	MR Egger Intercept	49	0.000265984	0.0166189	0.930284	NA	NA	NA	NA	radial
RA	asthma	asthma	RA	Inverse variance weighted	47	0.103089	0.0340335	5.53614e-10	93.23932560762564	46	4.728625486773168e-5	73.91320338951833	direction only steiger
RA	asthma	asthma	RA	MR Egger	47	0.0856441	0.0209489	0.0154878	92.52675282185925	45	3.9066112546436656e-5	NA	direction only steiger
RA	asthma	asthma	RA	Weighted median	47	0.0818865	0.030695	9.27297e-05	NA	NA	NA	NA	direction only steiger
RA	asthma	asthma	RA	Weighted mode	47	0.0594868	0.0249902	0.0587758	NA	NA	NA	NA	direction only steiger
RA	asthma	asthma	RA	MR GRIP	47	0.0934839	0.00303536	0.000517093	NA	NA	NA	NA	direction only steiger
RA	asthma	asthma	RA	MR Egger Intercept	47	0.00178689	0.0516743	0.559012	NA	NA	NA	NA	direction only steiger
asthma	RA	RA	asthma	Inverse variance weighted	151	0.299933	0.12104	6.46362e-09	1163.7384205025517	150	2.7157494873233453e-156	63.212213771803384	original
asthma	RA	RA	asthma	MR Egger	151	0.56573	0.0418696	6.55985e-06	1119.731081435027	149	2.0626495295608395e-148	NA	original
asthma	RA	RA	asthma	Weighted median	151	0.16902	0.145986	5.41836e-05	NA	NA	NA	NA	original
asthma	RA	RA	asthma	Weighted mode	151	-0.095421	0.081107	0.51435	NA	NA	NA	NA	original
asthma	RA	RA	asthma	MR GRIP	151	0.404919	0.00586422	1.64551e-06	NA	NA	NA	NA	original
asthma	RA	RA	asthma	MR Egger Intercept	151	-0.0141909	0.0345782	0.0167286	NA	NA	NA	NA	original
asthma	RA	RA	asthma	Inverse variance weighted	138	0.263475	0.098147	2.54303e-14	359.5696562631487	137	6.934928146286743e-22	63.212213771803384	radial
asthma	RA	RA	asthma	MR Egger	138	0.270421	0.0388106	0.00666833	359.5545200743774	136	4.258928365236985e-22	NA	radial
asthma	RA	RA	asthma	Weighted median	138	0.299895	0.0900913	1.09989e-14	NA	NA	NA	NA	radial
asthma	RA	RA	asthma	Weighted mode	138	0.423877	0.062646	6.13238e-06	NA	NA	NA	NA	radial
asthma	RA	RA	asthma	MR GRIP	138	0.258436	0.00433179	6.41297e-05	NA	NA	NA	NA	radial
asthma	RA	RA	asthma	MR Egger Intercept	138	-0.000327765	0.0347351	0.939797	NA	NA	NA	NA	radial
asthma	RA	RA	asthma	Inverse variance weighted	121	0.247599	0.0960093	1.01687e-12	277.9968345753016	120	1.463574070312832e-14	60.681596328784465	direction only steiger
asthma	RA	RA	asthma	MR Egger	121	0.316724	0.0412805	0.00128071	276.6097126729582	119	1.4232207825849205e-14	NA	direction only steiger
asthma	RA	RA	asthma	Weighted median	121	0.301336	0.0837835	2.88351e-13	NA	NA	NA	NA	direction only steiger
asthma	RA	RA	asthma	Weighted mode	121	0.443204	0.0621396	5.58718e-07	NA	NA	NA	NA	direction only steiger
asthma	RA	RA	asthma	MR GRIP	121	0.280793	0.00422234	1.47701e-05	NA	NA	NA	NA	direction only steiger
asthma	RA	RA	asthma	MR Egger Intercept	121	-0.00326174	0.0278703	0.441351	NA	NA	NA	NA	direction only steiger
PMR	asthma	asthma	PMR	Inverse variance weighted	8	0.0426751	0.0509649	0.125719	9.701190737539918	7	0.20614848428246907	157.2650947058297	original
PMR	asthma	asthma	PMR	MR Egger	8	0.0523953	0.0317395	0.343567	9.612128353255432	6	0.14196531038589189	NA	original
PMR	asthma	asthma	PMR	Weighted median	8	0.0406006	0.0415113	0.200833	NA	NA	NA	NA	original
PMR	asthma	asthma	PMR	Weighted mode	8	0.040536	0.0394224	0.361345	NA	NA	NA	NA	original
PMR	asthma	asthma	PMR	MR GRIP	8	0.0429113	0.0120924	0.318152	NA	NA	NA	NA	original
PMR	asthma	asthma	PMR	MR Egger Intercept	8	-0.00285118	0.0278703	0.821443	NA	NA	NA	NA	original
PMR	asthma	asthma	PMR	Inverse variance weighted	8	0.0426751	0.0509649	0.125719	9.701190737539918	7	0.20614848428246907	157.2650947058297	radial
PMR	asthma	asthma	PMR	MR Egger	8	0.0523953	0.032569	0.343567	9.612128353255432	6	0.14196531038589189	NA	radial
PMR	asthma	asthma	PMR	Weighted median	8	0.0406006	0.0384674	0.212544	NA	NA	NA	NA	radial
PMR	asthma	asthma	PMR	Weighted mode	8	0.040536	0.0394224	0.326994	NA	NA	NA	NA	radial
PMR	asthma	asthma	PMR	MR GRIP	8	0.0429113	0.0120924	0.318152	NA	NA	NA	NA	radial
PMR	asthma	asthma	PMR	MR Egger Intercept	8	-0.00285118	0.0313717	0.821443	NA	NA	NA	NA	radial
PMR	asthma	asthma	PMR	Inverse variance weighted	7	0.0334121	0.0615718	0.286857	8.88015	6	0.18043160059842556	141.91046615622326	direction only steiger
PMR	asthma	asthma	PMR	MR Egger	7	0.0330106	0.034197	0.61485	8.88004	5	0.11394582629630813	NA	direction only steiger
PMR	asthma	asthma	PMR	Weighted median	7	0.0299579	0.0392673	0.381009	NA	NA	NA	NA	direction only steiger
PMR	asthma	asthma	PMR	Weighted mode	7	0.0214912	0.0472723	0.603914	NA	NA	NA	NA	direction only steiger
PMR	asthma	asthma	PMR	MR GRIP	7	0.0261471	0.0135398	0.604003	NA	NA	NA	NA	direction only steiger
PMR	asthma	asthma	PMR	MR Egger Intercept	7	0.000106408	0.0530084	0.994033	NA	NA	NA	NA	direction only steiger
asthma	PMR	PMR	asthma	Inverse variance weighted	161	0.150726	0.12398	0.00446301	310.7977536140707	160	9.697776626798487e-12	62.96238947402547	original
asthma	PMR	PMR	asthma	MR Egger	161	0.220029	0.0669121	0.0778592	310.0514948506966	159	8.295198736411704e-12	NA	original
asthma	PMR	PMR	asthma	Weighted median	161	0.116794	0.145349	0.0809003	NA	NA	NA	NA	original
asthma	PMR	PMR	asthma	Weighted mode	161	0.10958	0.0825028	0.452013	NA	NA	NA	NA	original
asthma	PMR	PMR	asthma	MR GRIP	161	0.164488	0.00611062	0.0478925	NA	NA	NA	NA	original
asthma	PMR	PMR	asthma	MR Egger Intercept	161	-0.00378017	0.0512369	0.53705	NA	NA	NA	NA	original
asthma	PMR	PMR	asthma	Inverse variance weighted	159	0.0920719	0.129742	0.0723381	261.4136725537667	158	4.3186587774864757e-7	62.96238947402547	radial
asthma	PMR	PMR	asthma	MR Egger	159	-0.0978868	0.0682999	0.451694	257.2593907438283	157	7.80775353285219e-7	NA	radial
asthma	PMR	PMR	asthma	Weighted median	159	0.0677147	0.113822	0.321475	NA	NA	NA	NA	radial
asthma	PMR	PMR	asthma	Weighted mode	159	0.109687	0.0833727	0.336685	NA	NA	NA	NA	radial
asthma	PMR	PMR	asthma	MR GRIP	159	-0.0107806	0.0061603	0.897281	NA	NA	NA	NA	radial
asthma	PMR	PMR	asthma	MR Egger Intercept	159	0.00980875	0.0476306	0.113339	NA	NA	NA	NA	radial
asthma	PMR	PMR	asthma	Inverse variance weighted	111	0.016167	0.116073	0.73429	83.65507695038924	110	0.9710126261362254	65.21180100429851	direction only steiger
asthma	PMR	PMR	asthma	MR Egger	111	-0.0640841	0.0720969	0.582008	83.0803	109	0.9693776069707597	NA	direction only steiger
asthma	PMR	PMR	asthma	Weighted median	111	0.0779944	0.146738	0.279342	NA	NA	NA	NA	direction only steiger
asthma	PMR	PMR	asthma	Weighted mode	111	0.208876	0.0659905	0.157432	NA	NA	NA	NA	direction only steiger
asthma	PMR	PMR	asthma	MR GRIP	111	-0.0282572	0.00557482	0.669349	NA	NA	NA	NA	direction only steiger
asthma	PMR	PMR	asthma	MR Egger Intercept	111	0.00422661	0.0354701	0.449991	NA	NA	NA	NA	direction only steiger
OA	asthma	asthma	OA	Inverse variance weighted	129	0.230171	0.139422	8.63297e-11	330.4437381762697	128	7.799422593235068e-20	39.13019254326185	original
OA	asthma	asthma	OA	MR Egger	129	0.247525	0.0403759	0.0782329	330.4006176155393	127	4.867881022590462e-20	NA	original
OA	asthma	asthma	OA	Weighted median	129	0.177418	0.107223	1.11204e-05	NA	NA	NA	NA	original
OA	asthma	asthma	OA	Weighted mode	129	0.188167	0.0859085	0.0816676	NA	NA	NA	NA	original
OA	asthma	asthma	OA	MR GRIP	129	0.23565	0.00378868	0.00696791	NA	NA	NA	NA	original
OA	asthma	asthma	OA	MR Egger Intercept	129	-0.000487767	0.0342768	0.897765	NA	NA	NA	NA	original
OA	asthma	asthma	OA	Inverse variance weighted	127	0.212188	0.133924	5.99951e-10	297.63755253456594	126	6.40215570222119e-16	39.13019254326185	radial
OA	asthma	asthma	OA	MR Egger	127	0.293633	0.03938	0.030193	296.69788093260934	125	5.43456072146668e-16	NA	radial
OA	asthma	asthma	OA	Weighted median	127	0.175934	0.103381	7.90992e-06	NA	NA	NA	NA	radial
OA	asthma	asthma	OA	Weighted mode	127	0.188164	0.0825076	0.0711169	NA	NA	NA	NA	radial
OA	asthma	asthma	OA	MR GRIP	127	0.258473	0.00365524	0.00215781	NA	NA	NA	NA	radial
OA	asthma	asthma	OA	MR Egger Intercept	127	-0.00229986	0.032843	0.530369	NA	NA	NA	NA	radial
OA	asthma	asthma	OA	Inverse variance weighted	114	0.182892	0.126315	2.56683e-08	234.39500438420595	113	1.6697211000085e-10	39.70687866948683	direction only steiger
OA	asthma	asthma	OA	MR Egger	114	0.307749	0.0380698	0.0164118	232.2223721471159	112	2.0450331333614866e-10	NA	direction only steiger
OA	asthma	asthma	OA	Weighted median	114	0.161623	0.119108	2.18152e-05	NA	NA	NA	NA	direction only steiger
OA	asthma	asthma	OA	Weighted mode	114	0.20588	0.0780729	0.0866271	NA	NA	NA	NA	direction only steiger
OA	asthma	asthma	OA	MR GRIP	114	0.253941	0.00345308	0.00151151	NA	NA	NA	NA	direction only steiger
OA	asthma	asthma	OA	MR Egger Intercept	114	-0.00353473	0.0125487	0.308208	NA	NA	NA	NA	direction only steiger
asthma	OA	OA	asthma	Inverse variance weighted	161	0.0412853	0.0296937	0.00100189	406.05853126965394	160	2.414744130851514e-23	62.96238947402547	original
asthma	OA	OA	asthma	MR Egger	161	-0.0261259	0.0137966	0.380271	390.74438992067047	159	1.5931376628814363e-21	NA	original
asthma	OA	OA	asthma	Weighted median	161	0.025902	0.0183818	0.0604597	NA	NA	NA	NA	original
asthma	OA	OA	asthma	Weighted mode	161	0.0327291	0.0194681	0.0768894	NA	NA	NA	NA	original
asthma	OA	OA	asthma	MR GRIP	161	0.00172165	0.0014322	0.929643	NA	NA	NA	NA	original
asthma	OA	OA	asthma	MR Egger Intercept	161	0.00357522	0.0109455	0.0135686	NA	NA	NA	NA	original
asthma	OA	OA	asthma	Inverse variance weighted	156	0.0399617	0.0258021	0.000261236	292.427	155	1.6560751522067535e-10	62.96238947402547	radial
asthma	OA	OA	asthma	MR Egger	156	-0.0153527	0.013807	0.552705	282.22081141803693	154	1.36846757410569e-9	NA	radial
asthma	OA	OA	asthma	Weighted median	156	0.0259201	0.0172881	0.0604746	NA	NA	NA	NA	radial
asthma	OA	OA	asthma	Weighted mode	156	0.0345746	0.0169222	0.0472572	NA	NA	NA	NA	radial
asthma	OA	OA	asthma	MR GRIP	156	0.00979693	0.0012579	0.563476	NA	NA	NA	NA	radial
asthma	OA	OA	asthma	MR Egger Intercept	156	0.0029686	0.0118784	0.0195307	NA	NA	NA	NA	radial
asthma	OA	OA	asthma	Inverse variance weighted	141	0.0484689	0.0299375	4.49566e-05	257.54539028162003	140	5.556457973396247e-9	59.29531413909605	direction only steiger
asthma	OA	OA	asthma	MR Egger	141	-0.0117805	0.015331	0.694551	248.97732793859544	139	2.9980450517532656e-8	NA	direction only steiger
asthma	OA	OA	asthma	Weighted median	141	0.0534384	0.0211075	0.000490967	NA	NA	NA	NA	direction only steiger
asthma	OA	OA	asthma	Weighted mode	141	0.0420493	0.0193369	0.0482996	NA	NA	NA	NA	direction only steiger
asthma	OA	OA	asthma	MR GRIP	141	0.0170851	0.00138704	0.378464	NA	NA	NA	NA	direction only steiger
asthma	OA	OA	asthma	MR Egger Intercept	141	0.0030336	0.00138704	0.0304075	NA	NA	NA	NA	direction only steiger
psoriasis	COPD	COPD	psoriasis	Inverse variance weighted	52	0.0655784	0.0207093	0.00154223	106.311	51	9.08E-06	55.2357	NO HLA original
psoriasis	COPD	COPD	psoriasis	MR Egger	52	-0.0100506	0.0533429	0.851314	101.527	50	2.29E-05	NA	NO HLA original
psoriasis	COPD	COPD	psoriasis	Weighted median	52	0.0887992	0.0243722	2.69E-04	NA	NA	NA	NA	NO HLA original
psoriasis	COPD	COPD	psoriasis	Weighted mode	52	0.110481	0.0340733	0.00209173	NA	NA	NA	NA	NO HLA original
psoriasis	COPD	COPD	psoriasis	MR GRIP	52	0.0149734	0.0348597	0.669381	NA	NA	NA	NA	NO HLA original
psoriasis	COPD	COPD	psoriasis	MR Egger Intercept	52	0.0074517	0.00485472	0.131103	NA	NA	NA	NA	NO HLA original
psoriasis	COPD	COPD	psoriasis	Inverse variance weighted	51	0.0593441	0.0194048	0.00222654	90.4335	50	4.04E-04	55.2357	NO HLA radial
psoriasis	COPD	COPD	psoriasis	MR Egger	51	-0.00746699	0.0498008	0.88143	86.6938	49	7.26E-04	NA	NO HLA radial
psoriasis	COPD	COPD	psoriasis	Weighted median	51	0.0884604	0.0235556	1.73E-04	NA	NA	NA	NA	NO HLA radial
psoriasis	COPD	COPD	psoriasis	Weighted mode	51	0.110603	0.0350823	0.00273437	NA	NA	NA	NA	NO HLA radial
psoriasis	COPD	COPD	psoriasis	MR GRIP	51	0.0127535	0.0324848	0.696318	NA	NA	NA	NA	NO HLA radial
psoriasis	COPD	COPD	psoriasis	MR Egger Intercept	51	0.00660217	0.00454112	0.152359	NA	NA	NA	NA	NO HLA radial
psoriasis	COPD	COPD	psoriasis	Inverse variance weighted	51	0.0593441	0.0194048	0.00222654	90.4335	50	4.04E-04	55.2357	NO HLA direction only steiger
psoriasis	COPD	COPD	psoriasis	MR Egger	51	-0.00746699	0.0498008	0.88143	86.6938	49	7.26E-04	NA	NO HLA direction only steiger
psoriasis	COPD	COPD	psoriasis	Weighted median	51	0.0884604	0.0229769	1.18E-04	NA	NA	NA	NA	NO HLA direction only steiger
psoriasis	COPD	COPD	psoriasis	Weighted mode	51	0.110603	0.0346359	0.00243435	NA	NA	NA	NA	NO HLA direction only steiger
psoriasis	COPD	COPD	psoriasis	MR GRIP	51	0.0127535	0.0324848	0.696318	NA	NA	NA	NA	NO HLA direction only steiger
psoriasis	COPD	COPD	psoriasis	MR Egger Intercept	51	0.00660217	0.00454112	0.152359	NA	NA	NA	NA	NO HLA direction only steiger
COPD	psoriasis	psoriasis	COPD	Inverse variance weighted	40	0.107528	0.0510337	0.0351171	63.8939	39	0.00719673	37.49	NO HLA original
COPD	psoriasis	psoriasis	COPD	MR Egger	40	0.290321	0.181686	0.118342	62.0984	38	0.00809639	NA	NO HLA original
COPD	psoriasis	psoriasis	COPD	Weighted median	40	0.116955	0.0637715	0.0666585	NA	NA	NA	NA	NO HLA original
COPD	psoriasis	psoriasis	COPD	Weighted mode	40	0.146138	0.107055	0.180055	NA	NA	NA	NA	NO HLA original
COPD	psoriasis	psoriasis	COPD	MR GRIP	40	0.234166	0.12102	0.060467	NA	NA	NA	NA	NO HLA original
COPD	psoriasis	psoriasis	COPD	MR Egger Intercept	40	-0.00972119	0.00927431	0.301175	NA	NA	NA	NA	NO HLA original
COPD	psoriasis	psoriasis	COPD	Inverse variance weighted	40	0.107528	0.0510337	0.0351171	63.8939	39	0.00719673	37.49	NO HLA radial
COPD	psoriasis	psoriasis	COPD	MR Egger	40	0.290321	0.181686	0.118342	62.0984	38	0.00809639	NA	NO HLA radial
COPD	psoriasis	psoriasis	COPD	Weighted median	40	0.116955	0.060924	0.0548975	NA	NA	NA	NA	NO HLA radial
COPD	psoriasis	psoriasis	COPD	Weighted mode	40	0.146138	0.113468	0.205363	NA	NA	NA	NA	NO HLA radial
COPD	psoriasis	psoriasis	COPD	MR GRIP	40	0.234166	0.12102	0.060467	NA	NA	NA	NA	NO HLA radial
COPD	psoriasis	psoriasis	COPD	MR Egger Intercept	40	-0.00972119	0.00927431	0.301175	NA	NA	NA	NA	NO HLA radial
COPD	psoriasis	psoriasis	COPD	Inverse variance weighted	40	0.107528	0.0510337	0.0351171	63.8939	39	0.00719673	37.49	NO HLA direction only steiger
COPD	psoriasis	psoriasis	COPD	MR Egger	40	0.290321	0.181686	0.118342	62.0984	38	0.00809639	NA	NO HLA direction only steiger
COPD	psoriasis	psoriasis	COPD	Weighted median	40	0.116955	0.0625789	0.061634	NA	NA	NA	NA	NO HLA direction only steiger
COPD	psoriasis	psoriasis	COPD	Weighted mode	40	0.146138	0.117739	0.221945	NA	NA	NA	NA	NO HLA direction only steiger
COPD	psoriasis	psoriasis	COPD	MR GRIP	40	0.234166	0.12102	0.060467	NA	NA	NA	NA	NO HLA direction only steiger
COPD	psoriasis	psoriasis	COPD	MR Egger Intercept	40	-0.00972119	0.00927431	0.301175	NA	NA	NA	NA	NO HLA direction only steiger
RA	COPD	COPD	RA	Inverse variance weighted	47	0.142978	0.0229132	4.38E-10	84.3914	46	4.79E-04	60.7158	NO HLA original
RA	COPD	COPD	RA	MR Egger	47	0.110218	0.0459476	0.0206554	83.1384	45	4.68E-04	NA	NO HLA original
RA	COPD	COPD	RA	Weighted median	47	0.111497	0.0292027	1.35E-04	NA	NA	NA	NA	NO HLA original
RA	COPD	COPD	RA	Weighted mode	47	0.11134	0.0241935	3.30E-05	NA	NA	NA	NA	NO HLA original
RA	COPD	COPD	RA	MR GRIP	47	0.127273	0.0350991	7.30E-04	NA	NA	NA	NA	NO HLA original
RA	COPD	COPD	RA	MR Egger Intercept	47	0.00323102	0.00392341	0.414555	NA	NA	NA	NA	NO HLA original
RA	COPD	COPD	RA	Inverse variance weighted	44	0.133547	0.0173689	1.48E-14	42.6273	43	0.487349	60.7158	NO HLA radial
RA	COPD	COPD	RA	MR Egger	44	0.0950127	0.0339319	0.00768748	40.8798	42	0.520078	NA	NO HLA radial
RA	COPD	COPD	RA	Weighted median	44	0.111345	0.028069	7.28E-05	NA	NA	NA	NA	NO HLA radial
RA	COPD	COPD	RA	Weighted mode	44	0.109608	0.0269069	1.95E-04	NA	NA	NA	NA	NO HLA radial
RA	COPD	COPD	RA	MR GRIP	44	0.108023	0.0255589	1.25E-04	NA	NA	NA	NA	NO HLA radial
RA	COPD	COPD	RA	MR Egger Intercept	44	0.00388208	0.00293661	0.193336	NA	NA	NA	NA	NO HLA radial
RA	COPD	COPD	RA	Inverse variance weighted	44	0.133547	0.0173689	1.48E-14	42.6273	43	0.487349	60.7158	NO HLA direction only steiger
RA	COPD	COPD	RA	MR Egger	44	0.0950127	0.0339319	0.00768748	40.8798	42	0.520078	NA	NO HLA direction only steiger
RA	COPD	COPD	RA	Weighted median	44	0.111345	0.028241	8.06E-05	NA	NA	NA	NA	NO HLA direction only steiger
RA	COPD	COPD	RA	Weighted mode	44	0.109608	0.0294793	5.76E-04	NA	NA	NA	NA	NO HLA direction only steiger
RA	COPD	COPD	RA	MR GRIP	44	0.108023	0.0255589	1.25E-04	NA	NA	NA	NA	NO HLA direction only steiger
RA	COPD	COPD	RA	MR Egger Intercept	44	0.00388208	0.00293661	0.193336	NA	NA	NA	NA	NO HLA direction only steiger
COPD	RA	RA	COPD	Inverse variance weighted	40	0.245627	0.048425	3.93E-07	85.453	39	2.53E-05	37.49	NO HLA original
COPD	RA	RA	COPD	MR Egger	40	0.0678004	0.194529	0.729361	83.4952	38	2.93E-05	NA	NO HLA original
COPD	RA	RA	COPD	Weighted median	40	0.174137	0.056357	0.0020023	NA	NA	NA	NA	NO HLA original
COPD	RA	RA	COPD	Weighted mode	40	0.112892	0.0903244	0.218802	NA	NA	NA	NA	NO HLA original
COPD	RA	RA	COPD	MR GRIP	40	0.139602	0.127438	0.280214	NA	NA	NA	NA	NO HLA original
COPD	RA	RA	COPD	MR Egger Intercept	40	0.00920561	0.00975234	0.351164	NA	NA	NA	NA	NO HLA original
COPD	RA	RA	COPD	Inverse variance weighted	40	0.245627	0.048425	3.93E-07	85.453	39	2.53E-05	37.49	NO HLA radial
COPD	RA	RA	COPD	MR Egger	40	0.0678004	0.194529	0.729361	83.4952	38	2.93E-05	NA	NO HLA radial
COPD	RA	RA	COPD	Weighted median	40	0.174137	0.0539323	0.00124306	NA	NA	NA	NA	NO HLA radial
COPD	RA	RA	COPD	Weighted mode	40	0.112892	0.0825444	0.179251	NA	NA	NA	NA	NO HLA radial
COPD	RA	RA	COPD	MR GRIP	40	0.139602	0.127438	0.280214	NA	NA	NA	NA	NO HLA radial
COPD	RA	RA	COPD	MR Egger Intercept	40	0.00920561	0.00975234	0.351164	NA	NA	NA	NA	NO HLA radial
COPD	RA	RA	COPD	Inverse variance weighted	40	0.245627	0.048425	3.93E-07	85.453	39	2.53E-05	37.49	NO HLA direction only steiger
COPD	RA	RA	COPD	MR Egger	40	0.0678004	0.194529	0.729361	83.4952	38	2.93E-05	NA	NO HLA direction only steiger
COPD	RA	RA	COPD	Weighted median	40	0.174137	0.0554635	0.00169139	NA	NA	NA	NA	NO HLA direction only steiger
COPD	RA	RA	COPD	Weighted mode	40	0.112892	0.091637	0.225345	NA	NA	NA	NA	NO HLA direction only steiger
COPD	RA	RA	COPD	MR GRIP	40	0.139602	0.127438	0.280214	NA	NA	NA	NA	NO HLA direction only steiger
COPD	RA	RA	COPD	MR Egger Intercept	40	0.00920561	0.00975234	0.351164	NA	NA	NA	NA	NO HLA direction only steiger
OA	COPD	COPD	OA	Inverse variance weighted	125	0.417831	0.049562	3.44E-17	315.836	124	1.06E-18	38.9686	NO HLA original
OA	COPD	COPD	OA	MR Egger	125	0.296495	0.203359	0.147393	314.866	123	8.87E-19	NA	NO HLA original
OA	COPD	COPD	OA	Weighted median	125	0.307327	0.0539199	1.20E-08	NA	NA	NA	NA	NO HLA original
OA	COPD	COPD	OA	Weighted mode	125	0.297813	0.131938	0.0257442	NA	NA	NA	NA	NO HLA original
OA	COPD	COPD	OA	MR GRIP	125	0.330419	0.122903	0.00817358	NA	NA	NA	NA	NO HLA original
OA	COPD	COPD	OA	MR Egger Intercept	125	0.0033895	0.00550863	0.53949	NA	NA	NA	NA	NO HLA original
OA	COPD	COPD	OA	Inverse variance weighted	121	0.385644	0.0445735	5.07E-18	239.966	120	5.08E-10	38.9686	NO HLA radial
OA	COPD	COPD	OA	MR Egger	121	0.312798	0.182698	0.0894819	239.625	119	3.87E-10	NA	NO HLA radial
OA	COPD	COPD	OA	Weighted median	121	0.303476	0.0521562	5.93E-09	NA	NA	NA	NA	NO HLA radial
OA	COPD	COPD	OA	Weighted mode	121	0.308102	0.137121	0.026472	NA	NA	NA	NA	NO HLA radial
OA	COPD	COPD	OA	MR GRIP	121	0.330867	0.110661	0.00339164	NA	NA	NA	NA	NO HLA radial
OA	COPD	COPD	OA	MR Egger Intercept	121	0.00204098	0.00496302	0.681638	NA	NA	NA	NA	NO HLA radial
OA	COPD	COPD	OA	Inverse variance weighted	103	0.247295	0.0368204	1.86E-11	119.4	102	0.114834	39.6848	NO HLA direction only steiger
OA	COPD	COPD	OA	MR Egger	103	0.422628	0.145851	0.00461068	117.604	101	0.123833	NA	NO HLA direction only steiger
OA	COPD	COPD	OA	Weighted median	103	0.257049	0.051772	6.87E-07	NA	NA	NA	NA	NO HLA direction only steiger
OA	COPD	COPD	OA	Weighted mode	103	0.325819	0.152872	0.0354648	NA	NA	NA	NA	NO HLA direction only steiger
OA	COPD	COPD	OA	MR GRIP	103	0.334593	0.0881723	2.52E-04	NA	NA	NA	NA	NO HLA direction only steiger
OA	COPD	COPD	OA	MR Egger Intercept	103	-0.00498921	0.00401658	0.217057	NA	NA	NA	NA	NO HLA direction only steiger
COPD	OA	OA	COPD	Inverse variance weighted	40	0.127757	0.0328052	9.84E-05	205.507	39	1.72E-24	37.49	NO HLA original
COPD	OA	OA	COPD	MR Egger	40	-0.119692	0.139677	0.396861	189.036	38	6.23E-22	NA	NO HLA original
COPD	OA	OA	COPD	Weighted median	40	0.0760999	0.0261187	0.00357271	NA	NA	NA	NA	NO HLA original
COPD	OA	OA	COPD	Weighted mode	40	0.058329	0.0502664	0.252941	NA	NA	NA	NA	NO HLA original
COPD	OA	OA	COPD	MR GRIP	40	-0.0120125	0.0922229	0.897051	NA	NA	NA	NA	NO HLA original
COPD	OA	OA	COPD	MR Egger Intercept	40	0.0125211	0.00688126	0.0767063	NA	NA	NA	NA	NO HLA original
COPD	OA	OA	COPD	Inverse variance weighted	34	0.134267	0.0244529	4.00E-08	78.0609	33	1.62E-05	37.49	NO HLA radial
COPD	OA	OA	COPD	MR Egger	34	0.0239413	0.12982	0.854848	76.2756	32	1.77E-05	NA	NO HLA radial
COPD	OA	OA	COPD	Weighted median	34	0.0939582	0.0275962	6.62E-04	NA	NA	NA	NA	NO HLA radial
COPD	OA	OA	COPD	Weighted mode	34	0.0542806	0.05428	0.324582	NA	NA	NA	NA	NO HLA radial
COPD	OA	OA	COPD	MR GRIP	34	0.0711442	0.0813441	0.388304	NA	NA	NA	NA	NO HLA radial
COPD	OA	OA	COPD	MR Egger Intercept	34	0.00543875	0.0062843	0.393234	NA	NA	NA	NA	NO HLA radial
COPD	OA	OA	COPD	Inverse variance weighted	34	0.134267	0.0244529	4.00E-08	78.0609	33	1.62E-05	37.49	NO HLA direction only steiger
COPD	OA	OA	COPD	MR Egger	34	0.0239413	0.12982	0.854848	76.2756	32	1.77E-05	NA	NO HLA direction only steiger
COPD	OA	OA	COPD	Weighted median	34	0.0939582	0.0271059	5.28E-04	NA	NA	NA	NA	NO HLA direction only steiger
COPD	OA	OA	COPD	Weighted mode	34	0.0542806	0.0555877	0.335929	NA	NA	NA	NA	NO HLA direction only steiger
COPD	OA	OA	COPD	MR GRIP	34	0.0711442	0.0813441	0.388304	NA	NA	NA	NA	NO HLA direction only steiger
COPD	OA	OA	COPD	MR Egger Intercept	34	0.00543875	0.0062843	0.393234	NA	NA	NA	NA	NO HLA direction only steiger
COPD	PMR	PMR	COPD	Inverse variance weighted	40	0.240952	0.0895362	0.00712137	63.2778	39	0.00827217	37.49	NO HLA original
COPD	PMR	PMR	COPD	MR Egger	40	0.405566	0.36746	0.276664	62.9241	38	0.00670162	NA	NO HLA original
COPD	PMR	PMR	COPD	Weighted median	40	0.236028	0.104319	0.0236629	NA	NA	NA	NA	NO HLA original
COPD	PMR	PMR	COPD	Weighted mode	40	0.323324	0.19062	0.0978236	NA	NA	NA	NA	NO HLA original
COPD	PMR	PMR	COPD	MR GRIP	40	0.320671	0.240333	0.190054	NA	NA	NA	NA	NO HLA original
COPD	PMR	PMR	COPD	MR Egger Intercept	40	-0.00851391	0.0184205	0.646575	NA	NA	NA	NA	NO HLA original
COPD	PMR	PMR	COPD	Inverse variance weighted	39	0.184781	0.0716336	0.00989333	38.474	38	0.448031	37.49	NO HLA radial
COPD	PMR	PMR	COPD	MR Egger	39	0.495205	0.28695	0.0927361	37.2191	37	0.45899	NA	NO HLA radial
COPD	PMR	PMR	COPD	Weighted median	39	0.229094	0.104358	0.0281449	NA	NA	NA	NA	NO HLA radial
COPD	PMR	PMR	COPD	Weighted mode	39	0.302852	0.209228	0.155965	NA	NA	NA	NA	NO HLA radial
COPD	PMR	PMR	COPD	MR GRIP	39	0.358724	0.187861	0.0639729	NA	NA	NA	NA	NO HLA radial
COPD	PMR	PMR	COPD	MR Egger Intercept	39	-0.0161238	0.0144358	0.271225	NA	NA	NA	NA	NO HLA radial
COPD	PMR	PMR	COPD	Inverse variance weighted	39	0.184781	0.0716336	0.00989333	38.474	38	0.448031	37.4982	NO HLA direction only steiger
COPD	PMR	PMR	COPD	MR Egger	39	0.495205	0.28695	0.0927361	37.2191	37	0.45899	NA	NO HLA direction only steiger
COPD	PMR	PMR	COPD	Weighted median	39	0.229094	0.11141	0.0397516	NA	NA	NA	NA	NO HLA direction only steiger
COPD	PMR	PMR	COPD	Weighted mode	39	0.302852	0.200308	0.138822	NA	NA	NA	NA	NO HLA direction only steiger
COPD	PMR	PMR	COPD	MR GRIP	39	0.358724	0.187861	0.0639729	NA	NA	NA	NA	NO HLA direction only steiger
COPD	PMR	PMR	COPD	MR Egger Intercept	39	-0.0161238	0.0144358	0.271225	NA	NA	NA	NA	NO HLA direction only steiger
psoriasis	asthma	asthma	psoriasis	Inverse variance weighted	52	0.0475835	0.029068414070283904	0.10164148634395172	376.5476512253386	51	3.4412814040058364e-51	55.23572013539428	NO HLA original
psoriasis	asthma	asthma	psoriasis	MR Egger	52	-0.0247377	0.0735217	0.7379261732702003	368.109	50	4.926316172576424e-50	NA	NO HLA original
psoriasis	asthma	asthma	psoriasis	Weighted median	52	0.0468048	0.019948603266323476	0.0189625	NA	NA	NA	NA	NO HLA original
psoriasis	asthma	asthma	psoriasis	Weighted mode	52	0.0603751	0.020476804601515297	0.00480892	NA	NA	NA	NA	NO HLA original
psoriasis	asthma	asthma	psoriasis	MR GRIP	52	-0.00447181	0.050024876877432255	0.929128	NA	NA	NA	NA	NO HLA original
psoriasis	asthma	asthma	psoriasis	MR Egger Intercept	52	0.00694403	0.00648584	0.2894698949630707	NA	NA	NA	NA	NO HLA original
psoriasis	asthma	asthma	psoriasis	Inverse variance weighted	44	0.0733165	0.015810420633085565	3.5312049861682354e-6	82.10518096741409	43	3.0389721934552104e-4	55.23572013539428	NO HLA radial
psoriasis	asthma	asthma	psoriasis	MR Egger	44	0.0152847	0.0392604	0.6990102660532931	77.33631764044563	42	7.300767525416604e-4	NA	NO HLA radial
psoriasis	asthma	asthma	psoriasis	Weighted median	44	0.0495723	0.018819852830285935	0.00843752	NA	NA	NA	NA	NO HLA radial
psoriasis	asthma	asthma	psoriasis	Weighted mode	44	0.055661724123643674	0.022588527286504446	0.0178079	NA	NA	NA	NA	NO HLA radial
psoriasis	asthma	asthma	psoriasis	MR GRIP	44	0.0401289	0.027171767311174003	0.14717260624903913	NA	NA	NA	NA	NO HLA radial
psoriasis	asthma	asthma	psoriasis	MR Egger Intercept	44	0.00556885	0.00346039	0.11503988737821498	NA	NA	NA	NA	NO HLA radial
psoriasis	asthma	asthma	psoriasis	Inverse variance weighted	41	0.0744695	0.0165717	6.997028833633191e-6	81.46515739101288	40	1.1797662117736299e-4	56.58661139472348	NO HLA direction only steiger
psoriasis	asthma	asthma	psoriasis	MR Egger	41	0.015428704246344457	0.0406167	0.7061093538444873	76.52700592583956	39	3.0954396255779466e-4	NA	NO HLA direction only steiger
psoriasis	asthma	asthma	psoriasis	Weighted median	41	0.0509468	0.019903805299369155	0.010477732699829576	NA	NA	NA	NA	NO HLA direction only steiger
psoriasis	asthma	asthma	psoriasis	Weighted mode	41	0.0557497	0.021853010938419386	0.014667053988041343	NA	NA	NA	NA	NO HLA direction only steiger
psoriasis	asthma	asthma	psoriasis	MR GRIP	41	0.0409745	0.028202126188487952	0.15425392610096947	NA	NA	NA	NA	NO HLA direction only steiger
psoriasis	asthma	asthma	psoriasis	MR Egger Intercept	41	0.00568888	0.00358608	0.12072909054213059	NA	NA	NA	NA	NO HLA direction only steiger
asthma	psoriasis	psoriasis	asthma	Inverse variance weighted	148	0.033425435616909145	0.0413913	0.4193507325514644	447.3808068849327	147	4.495576276879098e-32	57.44959437871266	NO HLA original
asthma	psoriasis	psoriasis	asthma	MR Egger	148	-0.11443	0.10693027229798016	0.28632437727661847	440.60403850866777	146	2.540168932093283e-31	NA	NO HLA original
asthma	psoriasis	psoriasis	asthma	Weighted median	148	0.053504	0.0417447	0.19995	NA	NA	NA	NA	NO HLA original
asthma	psoriasis	psoriasis	asthma	Weighted mode	148	0.055432763701563026	0.0563265	0.3266673292718838	NA	NA	NA	NA	NO HLA original
asthma	psoriasis	psoriasis	asthma	MR GRIP	148	-0.045638	0.0695291	0.5126081112785503	NA	NA	NA	NA	NO HLA original
asthma	psoriasis	psoriasis	asthma	MR Egger Intercept	148	0.00731956	0.00488451	0.1361563899352076	NA	NA	NA	NA	NO HLA original
asthma	psoriasis	psoriasis	asthma	Inverse variance weighted	140	0.0745993	0.034677882872580494	0.0314598	266.67402951153895	139	4.4157202589878367e-10	57.44959437871266	NO HLA radial
asthma	psoriasis	psoriasis	asthma	MR Egger	140	-0.00542692	0.0883975	0.9511356378509507	264.81518541658994	138	4.989360558396759e-10	NA	NO HLA radial
asthma	psoriasis	psoriasis	asthma	Weighted median	140	0.058812678065802544	0.0413629	0.15506364118139182	NA	NA	NA	NA	NO HLA radial
asthma	psoriasis	psoriasis	asthma	Weighted mode	140	0.0593073	0.0613121	0.3350734403805343	NA	NA	NA	NA	NO HLA radial
asthma	psoriasis	psoriasis	asthma	MR GRIP	140	0.0362414	0.0586646	0.5377434187811485	NA	NA	NA	NA	NO HLA radial
asthma	psoriasis	psoriasis	asthma	MR Egger Intercept	140	0.00390091	0.00396347	0.3267326750344539	NA	NA	NA	NA	NO HLA radial
asthma	psoriasis	psoriasis	asthma	Inverse variance weighted	114	0.0479765	0.029412729484712727	0.1028589051650307	130.39119418304756	113	0.12586923219746413	58.4823	NO HLA direction only steiger
asthma	psoriasis	psoriasis	asthma	MR Egger	114	0.049080161848375686	0.0753041	0.5158915228961285	130.39089864059716	112	0.11288890441274145	NA	NO HLA direction only steiger
asthma	psoriasis	psoriasis	asthma	Weighted median	114	0.0616476	0.0441434	0.16255460230079954	NA	NA	NA	NA	NO HLA direction only steiger
asthma	psoriasis	psoriasis	asthma	Weighted mode	114	0.0678024	0.062243130371289215	0.27833236989107185	NA	NA	NA	NA	NO HLA direction only steiger
asthma	psoriasis	psoriasis	asthma	MR GRIP	114	0.054428046590534414	0.0506614	0.28497557118376143	NA	NA	NA	NA	NO HLA direction only steiger
asthma	psoriasis	psoriasis	asthma	MR Egger Intercept	114	-5.27e-05	0.00330597	0.987316	NA	NA	NA	NA	NO HLA direction only steiger
RA	asthma	asthma	RA	Inverse variance weighted	47	0.10743863527425725	0.028851399112091138	1.961980244638402e-4	255.33216826092288	46	8.308511594427624e-31	60.71579996209358	NO HLA original
RA	asthma	asthma	RA	MR Egger	47	0.056774917793828004	0.072241	0.4360392053829977	252.04886603533745	45	1.3532421883269257e-30	NA	NO HLA original
RA	asthma	asthma	RA	Weighted median	47	0.0744301	0.022979659467310138	0.00119969	NA	NA	NA	NA	NO HLA original
RA	asthma	asthma	RA	Weighted mode	47	0.0519831	0.0264226	0.0551876	NA	NA	NA	NA	NO HLA original
RA	asthma	asthma	RA	MR GRIP	47	0.0732441	0.0530298	0.1740420806010062	NA	NA	NA	NA	NO HLA original
RA	asthma	asthma	RA	MR Egger Intercept	47	0.00428109	0.00559158	0.4478934250603669	NA	NA	NA	NA	NO HLA original
RA	asthma	asthma	RA	Inverse variance weighted	39	0.095714	0.019599542333812607	1.0422951346824977e-6	82.6838	38	3.7147838925994207e-5	60.71579996209358	NO HLA radial
RA	asthma	asthma	RA	MR Egger	39	0.0587489	0.045624	0.2058543720645395	80.92116267931964	37	4.065588451056227e-5	NA	NO HLA radial
RA	asthma	asthma	RA	Weighted median	39	0.0745353	0.0226073	9.774059711652348e-4	NA	NA	NA	NA	NO HLA radial
RA	asthma	asthma	RA	Weighted mode	39	0.0508624	0.0303079	0.10151678906777384	NA	NA	NA	NA	NO HLA radial
RA	asthma	asthma	RA	MR GRIP	39	0.0713798	0.0336718	0.0407874	NA	NA	NA	NA	NO HLA radial
RA	asthma	asthma	RA	MR Egger Intercept	39	0.00327704	0.00365032	0.37512851431017336	NA	NA	NA	NA	NO HLA radial
RA	asthma	asthma	RA	Inverse variance weighted	38	0.0954076	0.020011780280111302	1.864584357397232e-6	82.6495	37	2.44559372768847e-5	61.253671939763535	NO HLA direction only steiger
RA	asthma	asthma	RA	MR Egger	38	0.0580959	0.046420386050532905	0.2188173207098801	80.86474102914254	36	2.685179422671081e-5	NA	NO HLA direction only steiger
RA	asthma	asthma	RA	Weighted median	38	0.074097	0.0243576	0.00234971	NA	NA	NA	NA	NO HLA direction only steiger
RA	asthma	asthma	RA	Weighted mode	38	0.046392225439659374	0.0300116	0.130662	NA	NA	NA	NA	NO HLA direction only steiger
RA	asthma	asthma	RA	MR GRIP	38	0.0705453	0.0344111	0.047694	NA	NA	NA	NA	NO HLA direction only steiger
RA	asthma	asthma	RA	MR Egger Intercept	38	0.00330008	0.00370223	0.37864751372037886	NA	NA	NA	NA	NO HLA direction only steiger
asthma	RA	RA	asthma	Inverse variance weighted	144	0.15992081928901403	0.0406184	8.245560104514341e-5	595.6867319085022	143	1.5061546837470931e-56	58.12279512530553	NO HLA original
asthma	RA	RA	asthma	MR Egger	144	-0.00157481	0.10525157355533406	0.9880832364507978	584.3276009651809	142	5.606111268241179e-55	NA	NO HLA original
asthma	RA	RA	asthma	Weighted median	144	0.1412382640044348	0.0417532	7.177858250793562e-4	NA	NA	NA	NA	NO HLA original
asthma	RA	RA	asthma	Weighted mode	144	-0.104366	0.1080624227187651	0.33577950813475244	NA	NA	NA	NA	NO HLA original
asthma	RA	RA	asthma	MR GRIP	144	0.070793	0.0680916	0.3002590752118671	NA	NA	NA	NA	NO HLA original
asthma	RA	RA	asthma	MR Egger Intercept	144	0.00804659	0.0048431	0.0988284	NA	NA	NA	NA	NO HLA original
asthma	RA	RA	asthma	Inverse variance weighted	136	0.18808038306694325	0.035077112109758835	8.23457245537484e-8	386.52458592098975	135	4.2593169286491717e-26	58.12279512530553	NO HLA radial
asthma	RA	RA	asthma	MR Egger	136	0.0539093	0.0927348	0.5619961316495085	379.61638320866496	134	2.4210632955645044e-25	NA	NO HLA radial
asthma	RA	RA	asthma	Weighted median	136	0.15926684218372056	0.041198073740252056	1.1068899425519892e-4	NA	NA	NA	NA	NO HLA radial
asthma	RA	RA	asthma	Weighted mode	136	-0.102677	0.12851642068221417	0.4257265825679365	NA	NA	NA	NA	NO HLA radial
asthma	RA	RA	asthma	MR GRIP	136	0.10487501325890264	0.0596901	0.0812033	NA	NA	NA	NA	NO HLA radial
asthma	RA	RA	asthma	MR Egger Intercept	136	0.00658186	0.00421489	0.12074711437662619	NA	NA	NA	NA	NO HLA radial
asthma	RA	RA	asthma	Inverse variance weighted	120	0.1693051037628859	0.0356031	1.9811033226699196e-6	311.3535735774465	119	3.818661753444198e-19	58.60747608836937	NO HLA direction only steiger
asthma	RA	RA	asthma	MR Egger	120	0.0771563	0.092161	0.4041778561461363	308.2843030145981	118	6.131417137410447e-19	NA	NO HLA direction only steiger
asthma	RA	RA	asthma	Weighted median	120	0.16111865225387428	0.0422762	1.3835158087002972e-4	NA	NA	NA	NA	NO HLA direction only steiger
asthma	RA	RA	asthma	Weighted mode	120	-0.11165	0.15291117870402113	0.4667274699049473	NA	NA	NA	NA	NO HLA direction only steiger
asthma	RA	RA	asthma	MR GRIP	120	0.11148896398977302	0.0600755	0.0659752	NA	NA	NA	NA	NO HLA direction only steiger
asthma	RA	RA	asthma	MR Egger Intercept	120	0.00453931	0.004188	0.28062582813442855	NA	NA	NA	NA	NO HLA direction only steiger
OA	asthma	asthma	OA	Inverse variance weighted	125	0.23104311896086163	0.036233807230828925	1.812379619660174e-10	329.43610619041607	124	1.506847055716828e-20	38.96859442480946	NO HLA original
OA	asthma	asthma	OA	MR Egger	125	0.2557626909977641	0.14395370201777374	0.0780895	329.35176349369135	123	9.394117598608009e-21	NA	NO HLA original
OA	asthma	asthma	OA	Weighted median	125	0.18058831785543975	0.041536652241740205	1.3758143574466902e-5	NA	NA	NA	NA	NO HLA original
OA	asthma	asthma	OA	Weighted mode	125	0.18956700574051344	0.1016271766953254	0.0645003	NA	NA	NA	NA	NO HLA original
OA	asthma	asthma	OA	MR GRIP	125	0.24057823539666795	0.0887975	0.00770496	NA	NA	NA	NA	NO HLA original
OA	asthma	asthma	OA	MR Egger Intercept	125	-0.000691	0.00389572	0.8594243151892759	NA	NA	NA	NA	NO HLA original
OA	asthma	asthma	OA	Inverse variance weighted	123	0.21282199666967053	0.0350261	1.2314184947514228e-9	296.6850016132577	122	1.423373668880685e-16	38.96859442480946	NO HLA radial
OA	asthma	asthma	OA	MR Egger	123	0.30244	0.13827381935443872	0.030647003570950942	295.58815928205564	121	1.2554111694338673e-16	NA	NO HLA radial
OA	asthma	asthma	OA	Weighted median	123	0.17692255205766982	0.0390739	5.957467921763727e-6	NA	NA	NA	NA	NO HLA radial
OA	asthma	asthma	OA	Weighted mode	123	0.18957028175952773	0.1078727536574579	0.0813664	NA	NA	NA	NA	NO HLA radial
OA	asthma	asthma	OA	MR GRIP	123	0.2638547785952508	0.0852868	0.00245511	NA	NA	NA	NA	NO HLA radial
OA	asthma	asthma	OA	MR Egger Intercept	123	-0.00251826	0.00375819	0.5040888889476685	NA	NA	NA	NA	NO HLA radial
OA	asthma	asthma	OA	Inverse variance weighted	111	0.18336281419154873	0.0335169	4.4813414268154874e-8	234.17050302734881	110	5.6150182231915914e-11	39.4609	NO HLA direction only steiger
OA	asthma	asthma	OA	MR Egger	111	0.3150469458770358	0.1302413826311295	0.017221280347372376	231.84205528721384	109	7.176689713891727e-11	NA	NO HLA direction only steiger
OA	asthma	asthma	OA	Weighted median	111	0.1659336104870077	0.040767058309518676	4.69553393541243e-5	NA	NA	NA	NA	NO HLA direction only steiger
OA	asthma	asthma	OA	Weighted mode	111	0.21017808379857605	0.1204353033439963	0.0837507	NA	NA	NA	NA	NO HLA direction only steiger
OA	asthma	asthma	OA	MR GRIP	111	0.25846336827012306	0.080611	0.00176473	NA	NA	NA	NA	NO HLA direction only steiger
OA	asthma	asthma	OA	MR Egger Intercept	111	-0.00370884	0.00354476	0.2977436991050938	NA	NA	NA	NA	NO HLA direction only steiger
asthma	OA	OA	asthma	Inverse variance weighted	148	0.0408344	0.013932504632752791	0.00338011	392.0383877277057	147	3.4852683551537676e-24	57.44959437871266	NO HLA original
asthma	OA	OA	asthma	MR Egger	148	-0.0392224	0.0363247	0.2820242797591899	377.39485103961994	146	2.1104667797562356e-22	NA	NO HLA original
asthma	OA	OA	asthma	Weighted median	148	0.047349	0.014240382190236808	8.8424125966933e-4	NA	NA	NA	NA	NO HLA original
asthma	OA	OA	asthma	Weighted mode	148	0.0461369	0.021907291317191404	0.036903308435193974	NA	NA	NA	NA	NO HLA original
asthma	OA	OA	asthma	MR GRIP	148	-0.00703713	0.023236770368298486	0.762439	NA	NA	NA	NA	NO HLA original
asthma	OA	OA	asthma	MR Egger Intercept	148	0.00393577	0.00165359	0.0185977	NA	NA	NA	NA	NO HLA original
asthma	OA	OA	asthma	Inverse variance weighted	142	0.0370948	0.011891791589765478	0.00181242	265.3189129970399	141	1.1945183130730114e-9	57.44959437871266	NO HLA radial
asthma	OA	OA	asthma	MR Egger	142	-0.0193193	0.030957268323148743	0.5336007766787846	258.16003750054233	140	4.80444785755604e-9	NA	NO HLA radial
asthma	OA	OA	asthma	Weighted median	142	0.0473591	0.014883337452387216	0.00146251	NA	NA	NA	NA	NO HLA radial
asthma	OA	OA	asthma	Weighted mode	142	0.049775339947842556	0.023928486222154554	0.039319885963856334	NA	NA	NA	NA	NO HLA radial
asthma	OA	OA	asthma	MR GRIP	142	0.00604619	0.019805015454842416	0.7606020347872964	NA	NA	NA	NA	NO HLA radial
asthma	OA	OA	asthma	MR Egger Intercept	142	0.00281216	0.00142724	0.050772	NA	NA	NA	NA	NO HLA radial
asthma	OA	OA	asthma	Inverse variance weighted	128	0.044135924778551966	0.012558248495382422	4.405878971456773e-4	231.89667092046017	127	3.905621152185282e-8	56.60514105757609	NO HLA direction only steiger
asthma	OA	OA	asthma	MR Egger	128	-0.011396	0.032917114279075094	0.7297667512625547	225.94200768923437	126	1.1469117830835864e-7	NA	NO HLA direction only steiger
asthma	OA	OA	asthma	Weighted median	128	0.0571415	0.016228727363408964	4.2991239860502937e-4	NA	NA	NA	NA	NO HLA direction only steiger
asthma	OA	OA	asthma	Weighted mode	128	0.0524467	0.023666186875726157	0.028465406492207867	NA	NA	NA	NA	NO HLA direction only steiger
asthma	OA	OA	asthma	MR GRIP	128	0.014276503913468776	0.0213047	0.5040130243677492	NA	NA	NA	NA	NO HLA direction only steiger
asthma	OA	OA	asthma	MR Egger Intercept	128	0.00269158	0.00147704	0.0707837	NA	NA	NA	NA	NO HLA direction only steiger
asthma	PMR	PMR	asthma	Inverse variance weighted	148	0.0809619	0.0530757	0.12715868021742577	242.74206077136424	147	1.1293329801874597e-6	57.44959437871266	NO HLA direction only steiger
asthma	PMR	PMR	asthma	MR Egger	148	-0.0267067	0.13723805744227222	0.8459757417687939	241.54428035108185	146	1.1113871876830775e-6	NA	NO HLA direction only steiger
asthma	PMR	PMR	asthma	Weighted median	148	0.060171919247929466	0.0686972	0.381084	NA	NA	NA	NA	NO HLA direction only steiger
asthma	PMR	PMR	asthma	Weighted mode	148	0.15302429805175954	0.12648389566172819	0.22828522767026468	NA	NA	NA	NA	NO HLA direction only steiger
asthma	PMR	PMR	asthma	MR GRIP	148	0.012463511704478616	0.0886994	0.8884475872885813	NA	NA	NA	NA	NO HLA direction only steiger
asthma	PMR	PMR	asthma	MR Egger Intercept	148	0.0054155	0.00636461	0.39623116274658443	NA	NA	NA	NA	NO HLA direction only steiger
asthma	PMR	PMR	asthma	Inverse variance weighted	147	0.0920508	0.051894	0.0760922	229.2495797864219	146	1.3018649419388294e-5	57.44959437871266	NO HLA direction only steiger
asthma	PMR	PMR	asthma	MR Egger	147	-0.0435901	0.1337209728676193	0.7449107165453688	227.35073633047767	145	1.4763847344886133e-5	NA	NO HLA direction only steiger
asthma	PMR	PMR	asthma	Weighted median	147	0.0708314	0.0678397	0.29644	NA	NA	NA	NA	NO HLA direction only steiger
asthma	PMR	PMR	asthma	Weighted mode	147	0.15302965743871022	0.14346865874293532	0.28789428766079783	NA	NA	NA	NA	NO HLA direction only steiger
asthma	PMR	PMR	asthma	MR GRIP	147	0.00841489	0.0863457	0.9224990063184259	NA	NA	NA	NA	NO HLA direction only steiger
asthma	PMR	PMR	asthma	MR Egger Intercept	147	0.00683842	0.00621406	0.27294855083484143	NA	NA	NA	NA	NO HLA direction only steiger
asthma	PMR	PMR	asthma	Inverse variance weighted	102	0.0428274	0.049773504659552395	0.38954312664891266	72.16242646837631	101	0.9865960977198203	61.73907637667785	NO HLA direction only steiger
asthma	PMR	PMR	asthma	MR Egger	102	0.025641170612167245	0.1241011807556243	0.8367306197688981	72.1396	100	0.9838906289148889	NA	NO HLA direction only steiger
asthma	PMR	PMR	asthma	Weighted median	102	0.1196324706796499	0.0786881	0.1284260985582794	NA	NA	NA	NA	NO HLA direction only steiger
asthma	PMR	PMR	asthma	Weighted mode	102	0.2704889172300313	0.1623723700559683	0.0988409	NA	NA	NA	NA	NO HLA direction only steiger
asthma	PMR	PMR	asthma	MR GRIP	102	0.0276209	0.069089	0.6901656280265253	NA	NA	NA	NA	NO HLA direction only steiger
asthma	PMR	PMR	asthma	MR Egger Intercept	102	8.747485773073104e-4	0.00578623	0.8801400928579308	NA	NA	NA	NA	NO HLA direction only steiger

## Sheet: S9 
dataset	Disease A	Disease B	First disease median age (IQR)	Second disease median age (IQR)	Interval (median [IQR])	Interval (mean [SD])	Overall A age onset	Overall B age onset	prop a < b	% within 1 month	% within 1 year	wilcox statistic	wilcox p
CPRD	asthma	OA	47 [34–59]	62 [53–71]	12.7 [6–21.8]	16.1 ± 13.8	37 [22–52]	63 [54–72]	0.746289	0.0119245	0.0655234	11937066063	0
CPRD	asthma	PMR	59 [46–67]	73 [65–79]	13.2 [6.6–21.6]	16.5 ± 14.2	37 [22–52]	73 [66–80]	0.817541	0.00848752	0.0550566	5.57673e+07	0
CPRD	asthma	psoriasis	32 [17–47]	47 [36–60]	12.1 [5.3–21.2]	14.9 ± 12.4	37 [22–52]	44 [32–58]	0.644436	0.0195169	0.0742264	7.00245e+08	2.0505e-156
CPRD	asthma	RA	44 [30–57]	58 [48–69]	12.7 [5.8–21.3]	15.5 ± 13	37 [22–52]	57 [46–68]	0.714677	0.0213248	0.0722341	7.95329e+07	9.95029e-180
CPRD	COPD	OA	64 [56–72]	71 [63–78]	4.7 [1.9–9]	6.6 ± 6.9	66 [57–75]	63 [54–72]	0.385303	0.0153576	0.101049	2.57496e+09	1
CPRD	COPD	PMR	69 [62–75]	76 [70–81]	5.5 [2.4–10.3]	7.4 ± 7.3	66 [57–75]	73 [66–80]	0.514586	0.0135557	0.120407	28465947	0.248417
CPRD	COPD	psoriasis	62 [54–69]	68 [60–75]	4.6 [1.8–8.7]	6.4 ± 6.9	66 [57–75]	44 [32–58]	0.292126	0.0120732	0.0819421	6.82954e+07	1
CPRD	COPD	RA	63 [55–70]	69 [62–76]	4.6 [1.7–9.2]	6.5 ± 6.9	66 [57–75]	57 [46–68]	0.360585	0.0223559	0.114316	2.18878e+07	1
CPRD	OA	asthma	58 [50–66]	66 [58–74]	6 [2.6–11.5]	8.1 ± 7.4	37 [22–52]	63 [54–72]	0.260516	0.0119245	0.0655234	5153331849	1
CPRD	OA	COPD	62 [54–70]	72 [64–79]	7.9 [3.6–13.9]	9.8 ± 8.2	66 [57–75]	63 [54–72]	0.621871	0.0153576	0.101049	4.32484e+09	0
CPRD	PMR	asthma	68 [60–74]	74 [67–81]	5.1 [2.2–9.3]	6.6 ± 6.1	37 [22–52]	73 [66–80]	0.186591	0.00848752	0.0550566	1.78259e+07	1
CPRD	PMR	COPD	71 [64–77]	78 [71–83]	5.4 [2.3–10.3]	7.1 ± 6.3	66 [57–75]	73 [66–80]	0.490664	0.0135557	0.120407	27526878	0.998127
CPRD	psoriasis	asthma	36 [23–51]	49 [37–63]	9.1 [3.7–18.3]	12.7 ± 11.7	37 [22–52]	44 [32–58]	0.369035	0.0195169	0.0742264	5.26163e+08	1
CPRD	psoriasis	COPD	53 [40–64]	67 [59–75]	11.4 [4.9–22.6]	15.6 ± 14	66 [57–75]	44 [32–58]	0.712957	0.0120732	0.0819421	1.75265e+08	0
CPRD	RA	asthma	50 [39–60]	61 [51–70]	7.9 [3.2–15.5]	10.8 ± 10.1	37 [22–52]	57 [46–68]	0.300373	0.0213248	0.0722341	4.70524e+07	1
CPRD	RA	COPD	58 [49–66]	69 [62–76]	9.1 [3.8–17]	11.9 ± 10.7	66 [57–75]	57 [46–68]	0.651448	0.0223559	0.114316	4.21658e+07	8.35955e-217

## Sheet: S10 
exposure	outcome	method	nsnp	b	se	pval	Q	Q_df	Q_pval	Fstat
BMI	asthma	Inverse variance weighted	898	0.253452	0.0213912	2.1924e-32	2161.720042092897	897	6.671950411504758e-106	61.41850740703596
BMI	asthma	IVW radial	898	0.253508	0.021393	2.15129e-32	NA	NA	NA	NA
BMI	asthma	MR Egger	898	0.21362	0.0592356	0.000327782	2160.466179631564	896	6.199553650500729e-106	NA
BMI	asthma	Weighted median	898	0.247687	0.0304409	4.06346e-16	NA	NA	NA	NA
BMI	asthma	Weighted mode	898	0.249303	0.0434473	1.30938e-08	NA	NA	NA	NA
BMI	asthma	Weighted mode (NOME)	898	0.249303	0.0450552	4.12572e-08	NA	NA	NA	NA
BMI	asthma	Simple mode	898	0.30437	0.0871434	0.00050143	NA	NA	NA	NA
BMI	asthma	Simple mode (NOME)	898	0.30437	0.0872033	0.000505889	NA	NA	NA	NA
BMI	asthma	MR Egger Intercept	898	0.000646065	0.000895924	0.471026	NA	NA	NA	NA
WHR	asthma	Inverse variance weighted	535	0.203131	0.0325496	4.35792e-10	1785.4756478666643	534	1.6863647880350165e-134	56.68042060484798
WHR	asthma	IVW radial	535	0.203179	0.0325528	4.33309e-10	NA	NA	NA	NA
WHR	asthma	MR Egger	535	-0.0817413	0.0900061	0.364196	1747.7938118711097	533	4.907245143310673e-129	NA
WHR	asthma	Weighted median	535	0.171128	0.0317283	6.90738e-08	NA	NA	NA	NA
WHR	asthma	Weighted mode	535	0.0216521	0.0707722	0.759769	NA	NA	NA	NA
WHR	asthma	Weighted mode (NOME)	535	0.0216521	0.0692215	0.754559	NA	NA	NA	NA
WHR	asthma	Simple mode	535	0.326836	0.129688	0.0120201	NA	NA	NA	NA
WHR	asthma	Simple mode (NOME)	535	0.326836	0.140335	0.020233	NA	NA	NA	NA
WHR	asthma	MR Egger Intercept	535	0.00466585	0.0013764	0.000751021	NA	NA	NA	NA
SBP	asthma	Inverse variance weighted	691	0.00329945	0.00141374	0.0196039	1831.1943288742325	690	3.510863262989469e-104	67.37920684074287
SBP	asthma	IVW radial	691	0.00329951	0.00141375	0.0196025	NA	NA	NA	NA
SBP	asthma	MR Egger	691	-0.000274523	0.00371123	0.941055	1828.315742071869	689	5.2894986521596524e-104	NA
SBP	asthma	Weighted median	691	0.00169751	0.0016447	0.30202	NA	NA	NA	NA
SBP	asthma	Weighted mode	691	-0.000553952	0.0033501	0.868714	NA	NA	NA	NA
SBP	asthma	Weighted mode (NOME)	691	-0.000553952	0.00339333	0.870371	NA	NA	NA	NA
SBP	asthma	Simple mode	691	0.00249058	0.00559202	0.656184	NA	NA	NA	NA
SBP	asthma	Simple mode (NOME)	691	0.00249058	0.0060099	0.6787	NA	NA	NA	NA
SBP	asthma	MR Egger Intercept	691	0.00110397	0.00105995	0.297993	NA	NA	NA	NA
Lipids-LDL	asthma	Inverse variance weighted	537	-0.0155948	0.0212397	0.46281	1681.6820323351012	536	2.276174636555986e-118	251.17669841805204
Lipids-LDL	asthma	IVW radial	537	-0.0155948	0.0212397	0.462808	NA	NA	NA	NA
Lipids-LDL	asthma	MR Egger	537	-0.0284397	0.0285052	0.318874	1680.246478171246	535	2.0940464215277968e-118	NA
Lipids-LDL	asthma	Weighted median	537	-0.00906131	0.0229534	0.693012	NA	NA	NA	NA
Lipids-LDL	asthma	Weighted mode	537	-0.0188151	0.0170431	0.270101	NA	NA	NA	NA
Lipids-LDL	asthma	Weighted mode (NOME)	537	-0.0188151	0.0187417	0.315871	NA	NA	NA	NA
Lipids-LDL	asthma	Simple mode	537	0.0475679	0.0642849	0.459652	NA	NA	NA	NA
Lipids-LDL	asthma	Simple mode (NOME)	537	0.0475679	0.065701	0.469377	NA	NA	NA	NA
Lipids-LDL	asthma	MR Egger Intercept	537	0.000494796	0.000731857	0.49928	NA	NA	NA	NA
Lipids-HDL	asthma	Inverse variance weighted	801	-0.0659998	0.0187116	0.000419969	2405.671913484374	800	3.8703788793206204e-160	159.1069962240558
Lipids-HDL	asthma	IVW radial	801	-0.0659989	0.0187118	0.000420097	NA	NA	NA	NA
Lipids-HDL	asthma	MR Egger	801	-0.0390335	0.0256887	0.129037	2398.6382174030887	799	2.340066068829515e-159	NA
Lipids-HDL	asthma	Weighted median	801	-0.0386763	0.0222652	0.0823742	NA	NA	NA	NA
Lipids-HDL	asthma	Weighted mode	801	-0.0433113	0.0209983	0.039472	NA	NA	NA	NA
Lipids-HDL	asthma	Weighted mode (NOME)	801	-0.0433113	0.0214318	0.043624	NA	NA	NA	NA
Lipids-HDL	asthma	Simple mode	801	-0.0433113	0.0620895	0.485654	NA	NA	NA	NA
Lipids-HDL	asthma	Simple mode (NOME)	801	-0.0433113	0.0634423	0.495002	NA	NA	NA	NA
Lipids-HDL	asthma	MR Egger Intercept	801	-0.000880282	0.000575094	0.126246	NA	NA	NA	NA
Lipids-Trig	asthma	Inverse variance weighted	693	0.0111069	0.0210056	0.596972	2089.4167055875087	692	4.284525835477677e-140	159.24013064720387
Lipids-Trig	asthma	IVW radial	693	0.011107	0.0210056	0.596969	NA	NA	NA	NA
Lipids-Trig	asthma	MR Egger	693	-0.0504302	0.0286949	0.0792818	2060.292692876098	691	4.1520194263863746e-136	NA
Lipids-Trig	asthma	Weighted median	693	0.0324079	0.0225231	0.150187	NA	NA	NA	NA
Lipids-Trig	asthma	Weighted mode	693	-0.00319725	0.0180519	0.85947	NA	NA	NA	NA
Lipids-Trig	asthma	Weighted mode (NOME)	693	-0.00319725	0.0188968	0.865693	NA	NA	NA	NA
Lipids-Trig	asthma	Simple mode	693	-0.00319725	0.0719328	0.96456	NA	NA	NA	NA
Lipids-Trig	asthma	Simple mode (NOME)	693	-0.00319725	0.0691763	0.963149	NA	NA	NA	NA
Lipids-Trig	asthma	MR Egger Intercept	693	0.0019976	0.000639159	0.00185024	NA	NA	NA	NA
Education	asthma	Inverse variance weighted	671	-0.242993	0.0257033	3.2677e-21	1420.3624643982434	670	4.6392028658563225e-56	48.03321057464047
Education	asthma	IVW radial	671	-0.243076	0.025708	3.22102e-21	NA	NA	NA	NA
Education	asthma	MR Egger	671	-0.336872	0.092344	0.000284846	1417.9879435103558	669	5.972322534455099e-56	NA
Education	asthma	Weighted median	671	-0.254843	0.03123	3.34443e-16	NA	NA	NA	NA
Education	asthma	Weighted mode	671	-0.252219	0.152988	0.0996942	NA	NA	NA	NA
Education	asthma	Weighted mode (NOME)	671	-0.269414	0.167244	0.107671	NA	NA	NA	NA
Education	asthma	Simple mode	671	-0.269414	0.135134	0.0465925	NA	NA	NA	NA
Education	asthma	Simple mode (NOME)	671	-0.269414	0.126453	0.03349	NA	NA	NA	NA
Education	asthma	MR Egger Intercept	671	0.00135926	0.00128422	0.290239	NA	NA	NA	NA
Smoking-Ever	asthma	Inverse variance weighted	53	0.48763	0.109445	8.37103e-06	125.91661286570142	52	4.5297148379978635e-8	41.74075276635933
Smoking-Ever	asthma	IVW radial	53	0.486825	0.109584	8.89206e-06	NA	NA	NA	NA
Smoking-Ever	asthma	MR Egger	53	0.308637	0.497843	0.538052	125.5818562518287	51	3.143047161143693e-8	NA
Smoking-Ever	asthma	Weighted median	53	0.312255	0.114853	0.00655341	NA	NA	NA	NA
Smoking-Ever	asthma	Weighted mode	53	0.238473	0.226329	0.296912	NA	NA	NA	NA
Smoking-Ever	asthma	Weighted mode (NOME)	53	0.251704	0.255222	0.328593	NA	NA	NA	NA
Smoking-Ever	asthma	Simple mode	53	0.30463	0.267316	0.259681	NA	NA	NA	NA
Smoking-Ever	asthma	Simple mode (NOME)	53	0.30463	0.306895	0.325493	NA	NA	NA	NA
Smoking-Ever	asthma	MR Egger Intercept	53	0.00231157	0.00626933	0.713869	NA	NA	NA	NA
Smoking-Num	asthma	Inverse variance weighted	24	0.185209	0.0739073	0.0122117	55.963055966528465	23	1.4323363880273127e-4	96.63299420801324
Smoking-Num	asthma	IVW radial	24	0.185273	0.0738862	0.0121573	NA	NA	NA	NA
Smoking-Num	asthma	MR Egger	24	0.237118	0.168443	0.173192	55.66263609508937	22	9.556167999051884e-5	NA
Smoking-Num	asthma	Weighted median	24	0.183028	0.0753926	0.0151964	NA	NA	NA	NA
Smoking-Num	asthma	Weighted mode	24	0.193642	0.0748123	0.0164316	NA	NA	NA	NA
Smoking-Num	asthma	Weighted mode (NOME)	24	0.199994	0.0781408	0.0175281	NA	NA	NA	NA
Smoking-Num	asthma	Simple mode	24	0.193642	0.135093	0.1652	NA	NA	NA	NA
Smoking-Num	asthma	Simple mode (NOME)	24	0.193642	0.136742	0.170142	NA	NA	NA	NA
Smoking-Num	asthma	MR Egger Intercept	24	-0.00152839	0.00443548	0.73368	NA	NA	NA	NA
Alcohol	asthma	Inverse variance weighted	48	0.123152	0.0807293	0.127136	113.75205940529484	47	1.8485971547878577e-7	77.47829237304924
Alcohol	asthma	IVW radial	48	0.123119	0.0807262	0.127223	NA	NA	NA	NA
Alcohol	asthma	MR Egger	48	0.132171	0.12939	0.312366	113.73211737711743	46	1.1605604585082279e-7	NA
Alcohol	asthma	Weighted median	48	0.144034	0.0810806	0.0756617	NA	NA	NA	NA
Alcohol	asthma	Weighted mode	48	0.131459	0.0871753	0.138252	NA	NA	NA	NA
Alcohol	asthma	Weighted mode (NOME)	48	0.131459	0.0870653	0.137766	NA	NA	NA	NA
Alcohol	asthma	Simple mode	48	0.272664	0.205777	0.191562	NA	NA	NA	NA
Alcohol	asthma	Simple mode (NOME)	48	0.272664	0.209694	0.199841	NA	NA	NA	NA
Alcohol	asthma	MR Egger Intercept	48	-0.000226463	0.00252159	0.928829	NA	NA	NA	NA
PA	asthma	Inverse variance weighted	16	-0.207704	0.113599	0.0674902	46.48888362275483	15	4.4441735397057686e-5	39.145191440219115
PA	asthma	IVW radial	16	-0.206092	0.113624	0.0697075	NA	NA	NA	NA
PA	asthma	MR Egger	16	-0.66538	0.657197	0.328502	44.88442788205532	14	4.259322093119548e-5	NA
PA	asthma	Weighted median	16	-0.20352	0.10597	0.0547878	NA	NA	NA	NA
PA	asthma	Weighted mode	16	-0.209492	0.187905	0.282444	NA	NA	NA	NA
PA	asthma	Weighted mode (NOME)	16	-0.233742	0.177228	0.206992	NA	NA	NA	NA
PA	asthma	Simple mode	16	-0.142807	0.195548	0.476466	NA	NA	NA	NA
PA	asthma	Simple mode (NOME)	16	-0.142807	0.20854	0.50392	NA	NA	NA	NA
PA	asthma	MR Egger Intercept	16	0.010931	0.0154518	0.490912	NA	NA	NA	NA
BMI	COPD	Inverse variance weighted	900	0.411607	0.0280064	6.74959e-49	1702.740199520249	899	2.999825556759382e-52	61.381585770077265
BMI	COPD	IVW radial	900	0.411629	0.0280072	6.71142e-49	NA	NA	NA	NA
BMI	COPD	MR Egger	900	0.429084	0.0772672	3.69366e-08	1702.6285074640243	898	2.23370919746618e-52	NA
BMI	COPD	Weighted median	900	0.387077	0.0366988	5.22224e-26	NA	NA	NA	NA
BMI	COPD	Weighted mode	900	0.125166	0.0934743	0.180895	NA	NA	NA	NA
BMI	COPD	Weighted mode (NOME)	900	0.125166	0.102385	0.221835	NA	NA	NA	NA
BMI	COPD	Simple mode	900	0.589195	0.149609	8.84353e-05	NA	NA	NA	NA
BMI	COPD	Simple mode (NOME)	900	0.589195	0.153163	0.000128091	NA	NA	NA	NA
BMI	COPD	MR Egger Intercept	900	-0.000283222	0.00116691	0.808285	NA	NA	NA	NA
WHR	COPD	Inverse variance weighted	537	0.362599	0.0391532	2.02472e-20	1231.4774878878995	536	1.1708839647265424e-56	56.5410021743041
WHR	COPD	IVW radial	537	0.362649	0.0391569	2.01684e-20	NA	NA	NA	NA
WHR	COPD	MR Egger	537	-0.091139	0.107935	0.398829	1186.5790943848606	535	2.2398749538953453e-51	NA
WHR	COPD	Weighted median	537	0.223173	0.0463769	1.49315e-06	NA	NA	NA	NA
WHR	COPD	Weighted mode	537	0.0212989	0.123872	0.863547	NA	NA	NA	NA
WHR	COPD	Weighted mode (NOME)	537	0.0212989	0.119531	0.858643	NA	NA	NA	NA
WHR	COPD	Simple mode	537	0.239777	0.165059	0.146899	NA	NA	NA	NA
WHR	COPD	Simple mode (NOME)	537	0.239777	0.174375	0.169686	NA	NA	NA	NA
WHR	COPD	MR Egger Intercept	537	0.00748782	0.00166422	8.36969e-06	NA	NA	NA	NA
SBP	COPD	Inverse variance weighted	693	0.00621004	0.0017172	0.000298765	1309.1169732379578	692	1.481320288333082e-40	67.396425033288807
SBP	COPD	IVW radial	693	0.00620965	0.0017172	0.000299014	NA	NA	NA	NA
SBP	COPD	MR Egger	693	0.00604691	0.00449509	0.178993	1309.114051137006	691	1.074853999360486e-40	NA
SBP	COPD	Weighted median	693	0.00538199	0.00207597	0.00952755	NA	NA	NA	NA
SBP	COPD	Weighted mode	693	0.0093199	0.0059315	0.116581	NA	NA	NA	NA
SBP	COPD	Weighted mode (NOME)	693	0.0100947	0.00675887	0.135751	NA	NA	NA	NA
SBP	COPD	Simple mode	693	0.0069956	0.00849639	0.410586	NA	NA	NA	NA
SBP	COPD	Simple mode (NOME)	693	0.0069956	0.00771179	0.364654	NA	NA	NA	NA
SBP	COPD	MR Egger Intercept	693	5.12563e-05	0.00130512	0.968684	NA	NA	NA	NA
Lipids-LDL	COPD	Inverse variance weighted	542	-0.0361323	0.0209817	0.0850536	954.7926897116054	541	2.3876837807027435e-25	252.3050634648147
Lipids-LDL	COPD	IVW radial	542	-0.0361328	0.0209817	0.0850489	NA	NA	NA	NA
Lipids-LDL	COPD	MR Egger	542	-0.0675827	0.026256	0.0103188	947.8896398716498	540	8.096227430402458e-25	NA
Lipids-LDL	COPD	Weighted median	542	-0.0780677	0.0272622	0.00418871	NA	NA	NA	NA
Lipids-LDL	COPD	Weighted mode	542	-0.0805448	0.0218794	0.000255311	NA	NA	NA	NA
Lipids-LDL	COPD	Weighted mode (NOME)	542	-0.0805448	0.0211517	0.00015616	NA	NA	NA	NA
Lipids-LDL	COPD	Simple mode	542	-0.0455772	0.0862303	0.597333	NA	NA	NA	NA
Lipids-LDL	COPD	Simple mode (NOME)	542	-0.0455772	0.0873167	0.601901	NA	NA	NA	NA
Lipids-LDL	COPD	MR Egger Intercept	542	0.00149555	0.000754158	0.0478656	NA	NA	NA	NA
Lipids-HDL	COPD	Inverse variance weighted	809	-0.0431006	0.0220697	0.0508279	1545.0847669592606	808	1.0512394219318976e-48	158.3054665622365
Lipids-HDL	COPD	IVW radial	809	-0.0431011	0.0220697	0.0508255	NA	NA	NA	NA
Lipids-HDL	COPD	MR Egger	809	0.034906	0.0306391	0.254931	1520.1107947721714	807	2.898659657414867e-46	NA
Lipids-HDL	COPD	Weighted median	809	-0.030504	0.0333973	0.361049	NA	NA	NA	NA
Lipids-HDL	COPD	Weighted mode	809	-0.0400295	0.0261197	0.12578	NA	NA	NA	NA
Lipids-HDL	COPD	Weighted mode (NOME)	809	-0.0400295	0.0226918	0.0781005	NA	NA	NA	NA
Lipids-HDL	COPD	Simple mode	809	-0.0793283	0.0853332	0.35284	NA	NA	NA	NA
Lipids-HDL	COPD	Simple mode (NOME)	809	-0.0793283	0.0853356	0.352854	NA	NA	NA	NA
Lipids-HDL	COPD	MR Egger Intercept	809	-0.00243922	0.000669897	0.000288692	NA	NA	NA	NA
Lipids-Trig	COPD	Inverse variance weighted	698	0.0249605	0.0261782	0.340345	1569.78354497565	697	3.9017009004433287e-69	158.66251483731074
Lipids-Trig	COPD	IVW radial	698	0.0249606	0.0261782	0.340343	NA	NA	NA	NA
Lipids-Trig	COPD	MR Egger	698	-0.0968182	0.0359896	0.00731276	1518.5360475279683	696	3.564726308638421e-63	NA
Lipids-Trig	COPD	Weighted median	698	-0.0110412	0.0386881	0.775345	NA	NA	NA	NA
Lipids-Trig	COPD	Weighted mode	698	-0.0355584	0.0267077	0.183496	NA	NA	NA	NA
Lipids-Trig	COPD	Weighted mode (NOME)	698	-0.0355584	0.0260146	0.17211	NA	NA	NA	NA
Lipids-Trig	COPD	Simple mode	698	-0.0555054	0.0955353	0.561433	NA	NA	NA	NA
Lipids-Trig	COPD	Simple mode (NOME)	698	-0.0555054	0.083871	0.508322	NA	NA	NA	NA
Lipids-Trig	COPD	MR Egger Intercept	698	0.00385496	0.000795412	1.55044e-06	NA	NA	NA	NA
Education	COPD	Inverse variance weighted	674	-0.859577	0.033545	8.11457e-145	1125.092073837439	673	2.7076390042902763e-25	48.04092571448103
Education	COPD	IVW radial	674	-0.859647	0.0335535	9.0941e-145	NA	NA	NA	NA
Education	COPD	MR Egger	674	-0.776568	0.121961	3.56491e-10	1124.2535853918173	672	2.4754570563459223e-25	NA
Education	COPD	Weighted median	674	-0.805176	0.0443502	1.17375e-73	NA	NA	NA	NA
Education	COPD	Weighted mode	674	-0.84827	0.175772	1.72518e-06	NA	NA	NA	NA
Education	COPD	Weighted mode (NOME)	674	-0.878465	0.162858	9.54866e-08	NA	NA	NA	NA
Education	COPD	Simple mode	674	-0.833173	0.180866	4.89663e-06	NA	NA	NA	NA
Education	COPD	Simple mode (NOME)	674	-0.833173	0.177695	3.32846e-06	NA	NA	NA	NA
Education	COPD	MR Egger Intercept	674	-0.00120378	0.00170038	0.479223	NA	NA	NA	NA
Smoking-Ever	COPD	Inverse variance weighted	53	1.68224	0.129376	1.18049e-38	92.2069639756535	52	5.004578834376003e-4	41.74075276635933
Smoking-Ever	COPD	IVW radial	53	1.68446	0.129527	1.15072e-38	NA	NA	NA	NA
Smoking-Ever	COPD	MR Egger	53	2.3149	0.579098	0.000206827	89.99086099691348	51	6.201083566729097e-4	NA
Smoking-Ever	COPD	Weighted median	53	1.43221	0.16937	2.76461e-17	NA	NA	NA	NA
Smoking-Ever	COPD	Weighted mode	53	1.21647	0.411277	0.00465292	NA	NA	NA	NA
Smoking-Ever	COPD	Weighted mode (NOME)	53	1.26771	0.389114	0.00198008	NA	NA	NA	NA
Smoking-Ever	COPD	Simple mode	53	1.24209	0.405366	0.0034557	NA	NA	NA	NA
Smoking-Ever	COPD	Simple mode (NOME)	53	1.24209	0.46334	0.0098184	NA	NA	NA	NA
Smoking-Ever	COPD	MR Egger Intercept	53	-0.00836409	0.00746342	0.267675	NA	NA	NA	NA
Smoking-Num	COPD	Inverse variance weighted	24	1.08159	0.172637	3.72591e-10	109.0160048653426	23	3.7625592913966443e-13	96.63299420801324
Smoking-Num	COPD	IVW radial	24	1.0817	0.173573	4.60673e-10	NA	NA	NA	NA
Smoking-Num	COPD	MR Egger	24	0.896135	0.389339	0.0311973	107.6234965614077	22	2.9242070326101773e-13	NA
Smoking-Num	COPD	Weighted median	24	0.740048	0.129049	9.7734e-09	NA	NA	NA	NA
Smoking-Num	COPD	Weighted mode	24	0.709098	0.132506	1.95911e-05	NA	NA	NA	NA
Smoking-Num	COPD	Weighted mode (NOME)	24	0.725093	0.135358	1.93328e-05	NA	NA	NA	NA
Smoking-Num	COPD	Simple mode	24	1.6528	0.393082	0.000338033	NA	NA	NA	NA
Smoking-Num	COPD	Simple mode (NOME)	24	1.6528	0.364273	0.000147504	NA	NA	NA	NA
Smoking-Num	COPD	MR Egger Intercept	24	0.00543293	0.010183	0.599018	NA	NA	NA	NA
Alcohol	COPD	Inverse variance weighted	48	-0.0112691	0.148996	0.93971	204.17109335408028	47	1.7533671016795496e-21	77.47829237304924
Alcohol	COPD	IVW radial	48	-0.0112693	0.148996	0.939709	NA	NA	NA	NA
Alcohol	COPD	MR Egger	48	-0.269276	0.236809	0.261385	195.90909381393865	46	2.0870181708684388e-20	NA
Alcohol	COPD	Weighted median	48	0.0520923	0.128625	0.685482	NA	NA	NA	NA
Alcohol	COPD	Weighted mode	48	0.0223237	0.122074	0.855686	NA	NA	NA	NA
Alcohol	COPD	Weighted mode (NOME)	48	0.0223237	0.128299	0.862616	NA	NA	NA	NA
Alcohol	COPD	Simple mode	48	0.133108	0.312816	0.672403	NA	NA	NA	NA
Alcohol	COPD	Simple mode (NOME)	48	0.133108	0.354041	0.708633	NA	NA	NA	NA
Alcohol	COPD	MR Egger Intercept	48	0.00661831	0.00475174	0.170371	NA	NA	NA	NA
PA	COPD	Inverse variance weighted	17	-0.518284	0.0925507	2.14356e-08	15.535675838759232	16	0.4858093230364298	38.81226906791864
PA	COPD	IVW radial	17	-0.517556	0.0913897	1.48595e-08	NA	NA	NA	NA
PA	COPD	MR Egger	17	-0.11322	0.452628	0.805874	14.699859372916594	15	0.47324514369707377	NA
PA	COPD	Weighted median	17	-0.422672	0.129703	0.00111895	NA	NA	NA	NA
PA	COPD	Weighted mode	17	-0.417341	0.201575	0.0549536	NA	NA	NA	NA
PA	COPD	Weighted mode (NOME)	17	-0.427326	0.204029	0.0524951	NA	NA	NA	NA
PA	COPD	Simple mode	17	-0.482245	0.248235	0.0698644	NA	NA	NA	NA
PA	COPD	Simple mode (NOME)	17	-0.482245	0.219254	0.0428897	NA	NA	NA	NA
PA	COPD	MR Egger Intercept	17	-0.00969371	0.0106031	0.375058	NA	NA	NA	NA
BMI	OA	Inverse variance weighted	898	0.402025	0.0156299	6.71621e-146	2002.2738693402223	897	3.815528677157133e-86	61.41850740703596
BMI	OA	IVW radial	898	0.40217	0.0156327	5.95005e-146	NA	NA	NA	NA
BMI	OA	MR Egger	898	0.435537	0.05018	1.85449e-17	2001.1706282279952	896	3.4609835115127755e-86	NA
BMI	OA	Weighted median	898	0.37908	0.0192535	2.68685e-86	NA	NA	NA	NA
BMI	OA	Weighted mode	898	0.376675	0.0651748	1.03363e-08	NA	NA	NA	NA
BMI	OA	Weighted mode (NOME)	898	0.391784	0.0660649	4.31257e-09	NA	NA	NA	NA
BMI	OA	Simple mode	898	0.346455	0.0869196	7.26776e-05	NA	NA	NA	NA
BMI	OA	Simple mode (NOME)	898	0.346455	0.0862618	6.40604e-05	NA	NA	NA	NA
BMI	OA	MR Egger Intercept	898	-0.00051274	0.000729542	0.482347	NA	NA	NA	NA
WHR	OA	Inverse variance weighted	535	0.188176	0.0236279	1.66358e-15	1720.0710996808334	534	1.3341297775164354e-124	56.63037417910317
WHR	OA	IVW radial	535	0.188298	0.0236292	1.60154e-15	NA	NA	NA	NA
WHR	OA	MR Egger	535	0.0124864	0.0659577	0.849922	1694.2475634744706	533	5.450944993922387e-121	NA
WHR	OA	Weighted median	535	0.171174	0.0298451	9.72731e-09	NA	NA	NA	NA
WHR	OA	Weighted mode	535	0.165194	0.0471786	0.000501444	NA	NA	NA	NA
WHR	OA	Weighted mode (NOME)	535	0.165194	0.0472938	0.000517366	NA	NA	NA	NA
WHR	OA	Simple mode	535	0.203097	0.0897283	0.0240076	NA	NA	NA	NA
WHR	OA	Simple mode (NOME)	535	0.203097	0.0900505	0.0245144	NA	NA	NA	NA
WHR	OA	MR Egger Intercept	535	0.00288759	0.0010131	0.00453761	NA	NA	NA	NA
SBP	OA	Inverse variance weighted	690	-0.0020209	0.00101967	0.0474886	1891.9968616066587	689	9.866101078983203e-113	67.38059337239612
SBP	OA	IVW radial	690	-0.00202095	0.00101968	0.0474843	NA	NA	NA	NA
SBP	OA	MR Egger	690	-0.00391538	0.00269456	0.146661	1890.4114629817925	688	9.852762110034955e-113	NA
SBP	OA	Weighted median	690	-0.00138003	0.00113537	0.22418	NA	NA	NA	NA
SBP	OA	Weighted mode	690	-0.000495362	0.00302908	0.870145	NA	NA	NA	NA
SBP	OA	Weighted mode (NOME)	690	-0.000495362	0.00294784	0.866599	NA	NA	NA	NA
SBP	OA	Simple mode	690	0.00142339	0.00404283	0.724888	NA	NA	NA	NA
SBP	OA	Simple mode (NOME)	690	0.00142339	0.00384464	0.711327	NA	NA	NA	NA
SBP	OA	MR Egger Intercept	690	0.000595363	0.000783785	0.447754	NA	NA	NA	NA
Lipids-LDL	OA	Inverse variance weighted	539	-0.0390056	0.014627	0.00766053	1459.9968890946914	538	3.7292917685655446e-86	253.4654944404656
Lipids-LDL	OA	IVW radial	539	-0.0390054	0.0146269	0.00766033	NA	NA	NA	NA
Lipids-LDL	OA	MR Egger	539	-0.0492312	0.0197929	0.0131733	1458.3983125648151	537	3.7488441488837044e-86	NA
Lipids-LDL	OA	Weighted median	539	-0.0467	0.0198168	0.0184438	NA	NA	NA	NA
Lipids-LDL	OA	Weighted mode	539	-0.0583858	0.0138396	2.88298e-05	NA	NA	NA	NA
Lipids-LDL	OA	Weighted mode (NOME)	539	-0.0583858	0.0141757	4.40945e-05	NA	NA	NA	NA
Lipids-LDL	OA	Simple mode	539	-0.0583858	0.0475336	0.21987	NA	NA	NA	NA
Lipids-LDL	OA	Simple mode (NOME)	539	-0.0583858	0.0500048	0.243484	NA	NA	NA	NA
Lipids-LDL	OA	MR Egger Intercept	539	0.000380029	0.000495338	0.443292	NA	NA	NA	NA
Lipids-HDL	OA	Inverse variance weighted	804	-0.0132625	0.013688	0.33259	2427.181943928664	803	1.5168014180987888e-162	158.96347234515528
Lipids-HDL	OA	IVW radial	804	-0.0132626	0.013688	0.332584	NA	NA	NA	NA
Lipids-HDL	OA	MR Egger	804	0.0560291	0.0185427	0.00259418	2341.137279103768	802	2.3021475081891206e-150	NA
Lipids-HDL	OA	Weighted median	804	0.00214737	0.016138	0.894144	NA	NA	NA	NA
Lipids-HDL	OA	Weighted mode	804	0.00504496	0.0133978	0.706607	NA	NA	NA	NA
Lipids-HDL	OA	Weighted mode (NOME)	804	0.00504496	0.0121079	0.677035	NA	NA	NA	NA
Lipids-HDL	OA	Simple mode	804	0.0302067	0.0500363	0.546216	NA	NA	NA	NA
Lipids-HDL	OA	Simple mode (NOME)	804	0.0302067	0.0494617	0.541565	NA	NA	NA	NA
Lipids-HDL	OA	MR Egger Intercept	804	-0.00222584	0.000409976	7.50629e-08	NA	NA	NA	NA
Lipids-Trig	OA	Inverse variance weighted	697	0.00496054	0.015461	0.74833	2083.036161888307	696	3.288514839916744e-138	158.65585839523345
Lipids-Trig	OA	IVW radial	697	0.00496055	0.015461	0.74833	NA	NA	NA	NA
Lipids-Trig	OA	MR Egger	697	-0.0615126	0.0213078	0.00401197	2024.8689276371672	695	4.5014706866533366e-130	NA
Lipids-Trig	OA	Weighted median	697	-0.0559494	0.0170813	0.00105487	NA	NA	NA	NA
Lipids-Trig	OA	Weighted mode	697	-0.0358264	0.0144723	0.0135412	NA	NA	NA	NA
Lipids-Trig	OA	Weighted mode (NOME)	697	-0.0358264	0.0139513	0.0104377	NA	NA	NA	NA
Lipids-Trig	OA	Simple mode	697	-0.022461	0.0529743	0.671699	NA	NA	NA	NA
Lipids-Trig	OA	Simple mode (NOME)	697	-0.022461	0.0576551	0.696971	NA	NA	NA	NA
Lipids-Trig	OA	MR Egger Intercept	697	0.00204522	0.000457728	9.2066e-06	NA	NA	NA	NA
Education	OA	Inverse variance weighted	672	-0.285235	0.0198581	8.74401e-47	1609.4703923339666	671	7.606123852957716e-79	48.008971983607594
Education	OA	IVW radial	672	-0.28535	0.0198629	8.45608e-47	NA	NA	NA	NA
Education	OA	MR Egger	672	-0.247695	0.0733617	0.000776977	1608.791868800453	670	5.977800772518987e-79	NA
Education	OA	Weighted median	672	-0.276623	0.0230088	2.70716e-33	NA	NA	NA	NA
Education	OA	Weighted mode	672	-0.297314	0.0895681	0.000950848	NA	NA	NA	NA
Education	OA	Weighted mode (NOME)	672	-0.307188	0.0955079	0.00136064	NA	NA	NA	NA
Education	OA	Simple mode	672	-0.28744	0.0965435	0.00301262	NA	NA	NA	NA
Education	OA	Simple mode (NOME)	672	-0.28744	0.0976859	0.00336812	NA	NA	NA	NA
Education	OA	MR Egger Intercept	672	-0.000542304	0.00102017	0.595192	NA	NA	NA	NA
Smoking-Ever	OA	Inverse variance weighted	53	0.316579	0.0837925	0.000158009	157.99020540666518	52	1.270403709092247e-12	41.74075276635933
Smoking-Ever	OA	IVW radial	53	0.316667	0.0838681	0.000159511	NA	NA	NA	NA
Smoking-Ever	OA	MR Egger	53	0.573828	0.395564	0.152998	156.6295865786569	51	1.1414316760986613e-12	NA
Smoking-Ever	OA	Weighted median	53	0.360511	0.0834035	1.5428e-05	NA	NA	NA	NA
Smoking-Ever	OA	Weighted mode	53	0.449588	0.196396	0.0261597	NA	NA	NA	NA
Smoking-Ever	OA	Weighted mode (NOME)	53	0.476259	0.178882	0.0103	NA	NA	NA	NA
Smoking-Ever	OA	Simple mode	53	0.449588	0.242129	0.0690073	NA	NA	NA	NA
Smoking-Ever	OA	Simple mode (NOME)	53	0.449588	0.260621	0.0904563	NA	NA	NA	NA
Smoking-Ever	OA	MR Egger Intercept	53	-0.00340124	0.00511	0.508663	NA	NA	NA	NA
Smoking-Num	OA	Inverse variance weighted	24	0.0574688	0.0576767	0.319058	78.02412187026682	23	6.612944894539406e-8	96.63299420801324
Smoking-Num	OA	IVW radial	24	0.0574641	0.0576708	0.319048	NA	NA	NA	NA
Smoking-Num	OA	MR Egger	24	-0.230568	0.07459	0.00533451	39.236417029976664	22	0.0132568725901087	NA
Smoking-Num	OA	Weighted median	24	-0.0983438	0.0469645	0.0362598	NA	NA	NA	NA
Smoking-Num	OA	Weighted mode	24	-0.0812993	0.0414562	0.0620862	NA	NA	NA	NA
Smoking-Num	OA	Weighted mode (NOME)	24	-0.0812993	0.0443995	0.0800741	NA	NA	NA	NA
Smoking-Num	OA	Simple mode	24	-0.00570373	0.139624	0.967768	NA	NA	NA	NA
Smoking-Num	OA	Simple mode (NOME)	24	-0.00570373	0.153816	0.97074	NA	NA	NA	NA
Smoking-Num	OA	MR Egger Intercept	24	0.0105729	0.00226715	0.00011935	NA	NA	NA	NA
Alcohol	OA	Inverse variance weighted	48	-0.0145554	0.0771249	0.850308	218.05700363188635	47	7.311689316326016e-24	77.47829237304924
Alcohol	OA	IVW radial	48	-0.0145553	0.077125	0.850309	NA	NA	NA	NA
Alcohol	OA	MR Egger	48	0.0447472	0.114403	0.697503	215.72604921200823	46	8.43184302412131e-24	NA
Alcohol	OA	Weighted median	48	0.0266545	0.0601984	0.657926	NA	NA	NA	NA
Alcohol	OA	Weighted mode	48	0.0374984	0.0563355	0.508904	NA	NA	NA	NA
Alcohol	OA	Weighted mode (NOME)	48	0.0374984	0.0557064	0.504153	NA	NA	NA	NA
Alcohol	OA	Simple mode	48	0.10435	0.138448	0.454778	NA	NA	NA	NA
Alcohol	OA	Simple mode (NOME)	48	0.10435	0.138409	0.454653	NA	NA	NA	NA
Alcohol	OA	MR Egger Intercept	48	-0.00171886	0.00243807	0.484359	NA	NA	NA	NA
PA	OA	Inverse variance weighted	17	-0.0255016	0.0896954	0.776171	70.32619350350573	16	8.748344046906531e-9	38.81226906791864
PA	OA	IVW radial	17	-0.0254848	0.0896964	0.776317	NA	NA	NA	NA
PA	OA	MR Egger	17	0.411788	0.454224	0.378965	66.07733345008428	15	2.2104486573014285e-8	NA
PA	OA	Weighted median	17	0.0519004	0.0745915	0.486557	NA	NA	NA	NA
PA	OA	Weighted mode	17	0.0629746	0.125329	0.622178	NA	NA	NA	NA
PA	OA	Weighted mode (NOME)	17	0.0722924	0.13258	0.593085	NA	NA	NA	NA
PA	OA	Simple mode	17	-0.0115675	0.174854	0.948074	NA	NA	NA	NA
PA	OA	Simple mode (NOME)	17	-0.0115675	0.185265	0.950988	NA	NA	NA	NA
PA	OA	MR Egger Intercept	17	-0.0110424	0.0112436	0.341627	NA	NA	NA	NA
BMI	osteoporosis	Inverse variance weighted	900	-0.239561	0.0294364	4.00962e-16	1361.516230470668	899	1.4186248156302758e-21	61.381585770077265
BMI	osteoporosis	IVW radial	900	-0.239563	0.0294363	4.00694e-16	NA	NA	NA	NA
BMI	osteoporosis	MR Egger	900	-0.385125	0.0840414	5.24246e-06	1356.3532784569684	898	2.789297569298383e-21	NA
BMI	osteoporosis	Weighted median	900	-0.331089	0.0446325	1.18786e-13	NA	NA	NA	NA
BMI	osteoporosis	Weighted mode	900	-0.42475	0.0871369	1.28918e-06	NA	NA	NA	NA
BMI	osteoporosis	Weighted mode (NOME)	900	-0.42475	0.0864311	1.05851e-06	NA	NA	NA	NA
BMI	osteoporosis	Simple mode	900	-0.27925	0.165939	0.0927512	NA	NA	NA	NA
BMI	osteoporosis	Simple mode (NOME)	900	-0.27925	0.172304	0.105437	NA	NA	NA	NA
BMI	osteoporosis	MR Egger Intercept	900	0.00232428	0.00125715	0.0648085	NA	NA	NA	NA
WHR	osteoporosis	Inverse variance weighted	537	-0.140253	0.0416969	0.000769223	1011.4862765027608	536	1.2516949607414504e-31	56.5410021743041
WHR	osteoporosis	IVW radial	537	-0.140269	0.0416971	0.000768225	NA	NA	NA	NA
WHR	osteoporosis	MR Egger	537	-0.428754	0.116754	0.000264536	998.4462246702054	535	1.9685623662187684e-30	NA
WHR	osteoporosis	Weighted median	537	-0.133209	0.053688	0.0130953	NA	NA	NA	NA
WHR	osteoporosis	Weighted mode	537	0.131559	0.312219	0.673655	NA	NA	NA	NA
WHR	osteoporosis	Weighted mode (NOME)	537	0.131559	0.329986	0.690287	NA	NA	NA	NA
WHR	osteoporosis	Simple mode	537	-0.119181	0.234724	0.611837	NA	NA	NA	NA
WHR	osteoporosis	Simple mode (NOME)	537	-0.119181	0.247232	0.629958	NA	NA	NA	NA
WHR	osteoporosis	MR Egger Intercept	537	0.00475577	0.00179915	0.0084498	NA	NA	NA	NA
SBP	osteoporosis	Inverse variance weighted	693	-0.00261577	0.00199216	0.189172	1340.2988345420763	692	8.234146667511986e-44	67.396425033288807
SBP	osteoporosis	IVW radial	693	-0.00261577	0.00199216	0.189171	NA	NA	NA	NA
SBP	osteoporosis	MR Egger	693	0.00432544	0.0051685	0.402946	1336.2037532855531	691	1.5986112460141502e-43	NA
SBP	osteoporosis	Weighted median	693	-0.000434359	0.00243427	0.858382	NA	NA	NA	NA
SBP	osteoporosis	Weighted mode	693	0.00910364	0.00540024	0.0922881	NA	NA	NA	NA
SBP	osteoporosis	Weighted mode (NOME)	693	0.00910364	0.00572323	0.112146	NA	NA	NA	NA
SBP	osteoporosis	Simple mode	693	0.0151733	0.00878358	0.0845313	NA	NA	NA	NA
SBP	osteoporosis	Simple mode (NOME)	693	0.0151733	0.00870264	0.0816859	NA	NA	NA	NA
SBP	osteoporosis	MR Egger Intercept	693	-0.00219609	0.00150909	0.146058	NA	NA	NA	NA
Lipids-LDL	osteoporosis	Inverse variance weighted	551	0.0127582	0.0240914	0.596406	995.7382647013834	550	3.6938813078425596e-28	248.60703367633863
Lipids-LDL	osteoporosis	IVW radial	551	0.0127582	0.0240914	0.596406	NA	NA	NA	NA
Lipids-LDL	osteoporosis	MR Egger	551	0.0272642	0.0304379	0.370788	994.635347050784	549	3.511383575681598e-28	NA
Lipids-LDL	osteoporosis	Weighted median	551	-0.0212145	0.0305905	0.487997	NA	NA	NA	NA
Lipids-LDL	osteoporosis	Weighted mode	551	0.0107576	0.0250197	0.667389	NA	NA	NA	NA
Lipids-LDL	osteoporosis	Weighted mode (NOME)	551	0.0107576	0.0240872	0.655332	NA	NA	NA	NA
Lipids-LDL	osteoporosis	Simple mode	551	-0.0557342	0.0984108	0.571392	NA	NA	NA	NA
Lipids-LDL	osteoporosis	Simple mode (NOME)	551	-0.0557342	0.104419	0.593727	NA	NA	NA	NA
Lipids-LDL	osteoporosis	MR Egger Intercept	551	-0.000683995	0.000876652	0.435588	NA	NA	NA	NA
Lipids-HDL	osteoporosis	Inverse variance weighted	813	0.0235282	0.0249804	0.346261	1419.736502097306	812	9.276938486923184e-36	157.6844735875586
Lipids-HDL	osteoporosis	IVW radial	813	0.0235283	0.0249804	0.346259	NA	NA	NA	NA
Lipids-HDL	osteoporosis	MR Egger	813	-0.0157794	0.0352085	0.654151	1415.364567320079	811	1.795901770443948e-35	NA
Lipids-HDL	osteoporosis	Weighted median	813	0.0305857	0.0412807	0.458742	NA	NA	NA	NA
Lipids-HDL	osteoporosis	Weighted mode	813	0.00785851	0.0300189	0.793553	NA	NA	NA	NA
Lipids-HDL	osteoporosis	Weighted mode (NOME)	813	0.00785851	0.0328239	0.810845	NA	NA	NA	NA
Lipids-HDL	osteoporosis	Simple mode	813	0.0737436	0.124544	0.553943	NA	NA	NA	NA
Lipids-HDL	osteoporosis	Simple mode (NOME)	813	0.0737436	0.11551	0.523383	NA	NA	NA	NA
Lipids-HDL	osteoporosis	MR Egger Intercept	813	0.0011999	0.000758109	0.113868	NA	NA	NA	NA
Lipids-Trig	osteoporosis	Inverse variance weighted	702	-0.0515348	0.0291814	0.0773934	1428.9058670496054	701	4.483739735851613e-52	157.97603707775227
Lipids-Trig	osteoporosis	IVW radial	702	-0.0515346	0.0291814	0.0773947	NA	NA	NA	NA
Lipids-Trig	osteoporosis	MR Egger	702	0.0774557	0.0402307	0.0545983	1387.20108557635	700	1.1883053104255414e-47	NA
Lipids-Trig	osteoporosis	Weighted median	702	0.0929842	0.0407067	0.0223571	NA	NA	NA	NA
Lipids-Trig	osteoporosis	Weighted mode	702	0.087694	0.034669	0.0116416	NA	NA	NA	NA
Lipids-Trig	osteoporosis	Weighted mode (NOME)	702	0.087694	0.0330865	0.00821994	NA	NA	NA	NA
Lipids-Trig	osteoporosis	Simple mode	702	-0.169269	0.147835	0.252604	NA	NA	NA	NA
Lipids-Trig	osteoporosis	Simple mode (NOME)	702	-0.169269	0.145406	0.244772	NA	NA	NA	NA
Lipids-Trig	osteoporosis	MR Egger Intercept	702	-0.00404082	0.00088084	5.31615e-06	NA	NA	NA	NA
Education	osteoporosis	Inverse variance weighted	674	-0.0290489	0.0339417	0.392083	858.5741588923217	673	1.4771949467590793e-6	48.04092571448103
Education	osteoporosis	IVW radial	674	-0.0290488	0.0339417	0.392084	NA	NA	NA	NA
Education	osteoporosis	MR Egger	674	0.0404796	0.125123	0.746404	858.1484904930958	672	1.3643222751634289e-6	NA
Education	osteoporosis	Weighted median	674	-0.0105386	0.0464492	0.820513	NA	NA	NA	NA
Education	osteoporosis	Weighted mode	674	0.178508	0.179029	0.319077	NA	NA	NA	NA
Education	osteoporosis	Weighted mode (NOME)	674	0.178508	0.173649	0.304327	NA	NA	NA	NA
Education	osteoporosis	Simple mode	674	0.236652	0.199886	0.236858	NA	NA	NA	NA
Education	osteoporosis	Simple mode (NOME)	674	0.236652	0.211711	0.264049	NA	NA	NA	NA
Education	osteoporosis	MR Egger Intercept	674	-0.00101019	0.00174971	0.563896	NA	NA	NA	NA
Smoking-Ever	osteoporosis	Inverse variance weighted	53	0.139032	0.12945	0.282811	68.44380809100223	52	0.06274543495253021	41.74075276635933
Smoking-Ever	osteoporosis	IVW radial	53	0.139022	0.12945	0.282847	NA	NA	NA	NA
Smoking-Ever	osteoporosis	MR Egger	53	-0.439139	0.598244	0.466281	67.1535115416976	51	0.06416689012793944	NA
Smoking-Ever	osteoporosis	Weighted median	53	0.207994	0.167284	0.213737	NA	NA	NA	NA
Smoking-Ever	osteoporosis	Weighted mode	53	0.17948	0.354332	0.614625	NA	NA	NA	NA
Smoking-Ever	osteoporosis	Weighted mode (NOME)	53	0.17948	0.334371	0.593716	NA	NA	NA	NA
Smoking-Ever	osteoporosis	Simple mode	53	0.218793	0.352941	0.538022	NA	NA	NA	NA
Smoking-Ever	osteoporosis	Simple mode (NOME)	53	0.218793	0.378514	0.565738	NA	NA	NA	NA
Smoking-Ever	osteoporosis	MR Egger Intercept	53	0.00758159	0.00765887	0.326892	NA	NA	NA	NA
Smoking-Num	osteoporosis	Inverse variance weighted	24	-0.00205867	0.114159	0.985612	62.0119672798453	23	1.9454929182955117e-5	96.63299420801324
Smoking-Num	osteoporosis	IVW radial	24	-0.00205867	0.114159	0.985612	NA	NA	NA	NA
Smoking-Num	osteoporosis	MR Egger	24	0.00629111	0.21022	0.976396	62.00553933711647	22	1.1230399403618229e-5	NA
Smoking-Num	osteoporosis	Weighted median	24	0.0971916	0.105289	0.35596	NA	NA	NA	NA
Smoking-Num	osteoporosis	Weighted mode	24	0.0608212	0.111504	0.590688	NA	NA	NA	NA
Smoking-Num	osteoporosis	Weighted mode (NOME)	24	0.0608212	0.108212	0.579515	NA	NA	NA	NA
Smoking-Num	osteoporosis	Simple mode	24	-0.0348386	0.201237	0.86407	NA	NA	NA	NA
Smoking-Num	osteoporosis	Simple mode (NOME)	24	-0.0348386	0.216442	0.87353	NA	NA	NA	NA
Smoking-Num	osteoporosis	MR Egger Intercept	24	-0.000320294	0.00670682	0.962341	NA	NA	NA	NA
Alcohol	osteoporosis	Inverse variance weighted	48	0.0545354	0.123052	0.657627	120.99591597409562	47	1.9130131544052288e-8	77.47829237304924
Alcohol	osteoporosis	IVW radial	48	0.0545368	0.123052	0.65762	NA	NA	NA	NA
Alcohol	osteoporosis	MR Egger	48	0.0122746	0.182017	0.946526	120.73098621721812	46	1.2619693010638412e-8	NA
Alcohol	osteoporosis	Weighted median	48	0.0261178	0.122404	0.831036	NA	NA	NA	NA
Alcohol	osteoporosis	Weighted mode	48	0.115316	0.112841	0.312046	NA	NA	NA	NA
Alcohol	osteoporosis	Weighted mode (NOME)	48	0.115316	0.119636	0.340038	NA	NA	NA	NA
Alcohol	osteoporosis	Simple mode	48	0.408496	0.28763	0.162145	NA	NA	NA	NA
Alcohol	osteoporosis	Simple mode (NOME)	48	0.408496	0.269488	0.136262	NA	NA	NA	NA
Alcohol	osteoporosis	MR Egger Intercept	48	0.00127192	0.00400338	0.75214	NA	NA	NA	NA
PA	osteoporosis	Inverse variance weighted	21	-0.123971	0.0884672	0.161119	17.87418495629684	20	0.5956960556317714	37.58753626089727
PA	osteoporosis	IVW radial	21	-0.123969	0.0836332	0.138263	NA	NA	NA	NA
PA	osteoporosis	MR Egger	21	0.0330962	0.396761	0.934393	17.709270263099775	19	0.5419299937339281	NA
PA	osteoporosis	Weighted median	21	-0.0913683	0.127923	0.475077	NA	NA	NA	NA
PA	osteoporosis	Weighted mode	21	-0.0708961	0.21759	0.747942	NA	NA	NA	NA
PA	osteoporosis	Weighted mode (NOME)	21	-0.0708961	0.233842	0.764884	NA	NA	NA	NA
PA	osteoporosis	Simple mode	21	-0.0373798	0.253744	0.88436	NA	NA	NA	NA
PA	osteoporosis	Simple mode (NOME)	21	-0.0373798	0.250889	0.883054	NA	NA	NA	NA
PA	osteoporosis	MR Egger Intercept	21	-0.00405189	0.00997765	0.689209	NA	NA	NA	NA
BMI	PMR	Inverse variance weighted	900	0.18888	0.0528068	0.000347815	1001.276463685911	899	0.00959658688797072	61.381585770077265
BMI	PMR	IVW radial	900	0.188879	0.0528067	0.000347815	NA	NA	NA	NA
BMI	PMR	MR Egger	900	0.0522045	0.150963	0.729566	1000.2361732191422	898	0.00958814306535143	NA
BMI	PMR	Weighted median	900	0.213845	0.0928969	0.0213373	NA	NA	NA	NA
BMI	PMR	Weighted mode	900	0.232216	0.157815	0.14152	NA	NA	NA	NA
BMI	PMR	Weighted mode (NOME)	900	0.232216	0.155222	0.134999	NA	NA	NA	NA
BMI	PMR	Simple mode	900	0.403577	0.272539	0.139009	NA	NA	NA	NA
BMI	PMR	Simple mode (NOME)	900	0.403577	0.289837	0.164138	NA	NA	NA	NA
BMI	PMR	MR Egger Intercept	900	0.00218227	0.0022581	0.334096	NA	NA	NA	NA
WHR	PMR	Inverse variance weighted	537	0.218248	0.0710065	0.00211464	671.7654665249212	536	5.6568813522803773e-05	56.5410021743041
WHR	PMR	IVW radial	537	0.218255	0.0710065	0.00211399	NA	NA	NA	NA
WHR	PMR	MR Egger	537	0.195939	0.198806	0.324786	671.7473383609715	535	5.022986498495312e-5	NA
WHR	PMR	Weighted median	537	0.138137	0.104223	0.185038	NA	NA	NA	NA
WHR	PMR	Weighted mode	537	-0.0162315	0.236697	0.945353	NA	NA	NA	NA
WHR	PMR	Weighted mode (NOME)	537	-0.0162315	0.259315	0.950113	NA	NA	NA	NA
WHR	PMR	Simple mode	537	0.111475	0.341042	0.743896	NA	NA	NA	NA
WHR	PMR	Simple mode (NOME)	537	0.111475	0.367682	0.761868	NA	NA	NA	NA
WHR	PMR	MR Egger Intercept	537	0.000368555	0.00306727	0.904404	NA	NA	NA	NA
SBP	PMR	Inverse variance weighted	693	0.00866971	0.00379745	0.0224282	1113.5670260420561	692	3.0636422152157956e-22	67.396425033288807
SBP	PMR	IVW radial	693	0.00866961	0.00379743	0.0224293	NA	NA	NA	NA
SBP	PMR	MR Egger	693	0.0188216	0.00986112	0.0567184	1111.5653818857645	691	3.5332531157399956e-22	NA
SBP	PMR	Weighted median	693	0.00735964	0.00486634	0.130443	NA	NA	NA	NA
SBP	PMR	Weighted mode	693	0.0118759	0.0125669	0.34498	NA	NA	NA	NA
SBP	PMR	Weighted mode (NOME)	693	0.0118759	0.0121202	0.327503	NA	NA	NA	NA
SBP	PMR	Simple mode	693	0.00926671	0.0163362	0.570727	NA	NA	NA	NA
SBP	PMR	Simple mode (NOME)	693	0.00926671	0.0178744	0.604321	NA	NA	NA	NA
SBP	PMR	MR Egger Intercept	693	-0.00321201	0.00287946	0.265029	NA	NA	NA	NA
Lipids-LDL	PMR	Inverse variance weighted	551	0.0645624	0.0423584	0.12746	704.1849668575351	550	8.785525848248522e-6	248.60703367633863
Lipids-LDL	PMR	IVW radial	551	0.0645626	0.0423584	0.127459	NA	NA	NA	NA
Lipids-LDL	PMR	MR Egger	551	0.0285142	0.0534748	0.594092	702.6248887358777	549	9.233185444928817e-6	NA
Lipids-LDL	PMR	Weighted median	551	-0.0747787	0.0667412	0.262531	NA	NA	NA	NA
Lipids-LDL	PMR	Weighted mode	551	0.00396828	0.0501392	0.936946	NA	NA	NA	NA
Lipids-LDL	PMR	Weighted mode (NOME)	551	0.00396828	0.0486134	0.934971	NA	NA	NA	NA
Lipids-LDL	PMR	Simple mode	551	0.0975995	0.173474	0.573926	NA	NA	NA	NA
Lipids-LDL	PMR	Simple mode (NOME)	551	0.0975995	0.174888	0.577024	NA	NA	NA	NA
Lipids-LDL	PMR	MR Egger Intercept	551	0.00170128	0.00154092	0.270045	NA	NA	NA	NA
Lipids-HDL	PMR	Inverse variance weighted	813	-0.00274995	0.047522	0.953855	1178.513612560146	812	5.362375353956086e-16	157.6844735875586
Lipids-HDL	PMR	IVW radial	813	-0.00274995	0.047522	0.953855	NA	NA	NA	NA
Lipids-HDL	PMR	MR Egger	813	0.0207541	0.0669537	0.756658	1178.1524940651475	811	4.696584967579261e-16	NA
Lipids-HDL	PMR	Weighted median	813	-0.0607878	0.0732055	0.406329	NA	NA	NA	NA
Lipids-HDL	PMR	Weighted mode	813	-0.0217528	0.0636987	0.732819	NA	NA	NA	NA
Lipids-HDL	PMR	Weighted mode (NOME)	813	-0.0217528	0.0650179	0.738039	NA	NA	NA	NA
Lipids-HDL	PMR	Simple mode	813	-0.144402	0.192485	0.453351	NA	NA	NA	NA
Lipids-HDL	PMR	Simple mode (NOME)	813	-0.144402	0.193329	0.455325	NA	NA	NA	NA
Lipids-HDL	PMR	MR Egger Intercept	813	-0.000720032	0.00144417	0.618211	NA	NA	NA	NA
Lipids-Trig	PMR	Inverse variance weighted	702	0.0248502	0.0487345	0.610114	920.075686115928	701	4.39022204414038e-8	157.97603707775227
Lipids-Trig	PMR	IVW radial	702	0.0248503	0.0487345	0.610113	NA	NA	NA	NA
Lipids-Trig	PMR	MR Egger	702	-0.0449941	0.0677922	0.507097	917.2026201030668	700	5.4322600812005065e-8	NA
Lipids-Trig	PMR	Weighted median	702	0.008763	0.0854129	0.918284	NA	NA	NA	NA
Lipids-Trig	PMR	Weighted mode	702	0.0141357	0.0637883	0.824687	NA	NA	NA	NA
Lipids-Trig	PMR	Weighted mode (NOME)	702	0.0141357	0.0674357	0.834027	NA	NA	NA	NA
Lipids-Trig	PMR	Simple mode	702	0.139939	0.211337	0.508085	NA	NA	NA	NA
Lipids-Trig	PMR	Simple mode (NOME)	702	0.139939	0.216961	0.51914	NA	NA	NA	NA
Lipids-Trig	PMR	MR Egger Intercept	702	0.00220892	0.00149173	0.139116	NA	NA	NA	NA
Education	PMR	Inverse variance weighted	674	-0.269214	0.0705069	0.000134398	846.1755611809027	673	5.8033962673709525e-6	48.04092571448103
Education	PMR	IVW radial	674	-0.269212	0.070507	0.00013441	NA	NA	NA	NA
Education	PMR	MR Egger	674	-0.194451	0.260119	0.454996	846.063295587935	672	5.205647642964926e-6	NA
Education	PMR	Weighted median	674	-0.20338	0.0903169	0.0243314	NA	NA	NA	NA
Education	PMR	Weighted mode	674	-0.097225	0.318079	0.759956	NA	NA	NA	NA
Education	PMR	Weighted mode (NOME)	674	-0.097225	0.327589	0.766719	NA	NA	NA	NA
Education	PMR	Simple mode	674	0.0658286	0.356906	0.853722	NA	NA	NA	NA
Education	PMR	Simple mode (NOME)	674	0.0658286	0.361661	0.855624	NA	NA	NA	NA
Education	PMR	MR Egger Intercept	674	-0.001086	0.00363682	0.765329	NA	NA	NA	NA
Smoking-Ever	PMR	Inverse variance weighted	53	0.474341	0.244916	0.0527763	55.985495222922545	52	0.3276994160229269	41.74075276635933
Smoking-Ever	PMR	IVW radial	53	0.474331	0.24492	0.0527848	NA	NA	NA	NA
Smoking-Ever	PMR	MR Egger	53	-0.110131	1.13775	0.923267	55.68316052992285	51	0.30299520866494944	NA
Smoking-Ever	PMR	Weighted median	53	0.522196	0.325823	0.109001	NA	NA	NA	NA
Smoking-Ever	PMR	Weighted mode	53	0.250052	0.591813	0.674389	NA	NA	NA	NA
Smoking-Ever	PMR	Weighted mode (NOME)	53	0.282297	0.619886	0.650717	NA	NA	NA	NA
Smoking-Ever	PMR	Simple mode	53	0.153317	0.674514	0.821082	NA	NA	NA	NA
Smoking-Ever	PMR	Simple mode (NOME)	53	0.153317	0.727359	0.833878	NA	NA	NA	NA
Smoking-Ever	PMR	MR Egger Intercept	53	0.00766539	0.0145669	0.601017	NA	NA	NA	NA
Smoking-Num	PMR	Inverse variance weighted	24	0.134364	0.170764	0.431376	31.700278466706624	23	0.10653893546039232	96.63299420801324
Smoking-Num	PMR	IVW radial	24	0.13436	0.170764	0.431389	NA	NA	NA	NA
Smoking-Num	PMR	MR Egger	24	-0.393932	0.284012	0.179328	25.83012745655879	22	0.25904693755381614	NA
Smoking-Num	PMR	Weighted median	24	-0.243251	0.204773	0.234873	NA	NA	NA	NA
Smoking-Num	PMR	Weighted mode	24	-0.110343	0.189106	0.565235	NA	NA	NA	NA
Smoking-Num	PMR	Weighted mode (NOME)	24	-0.110343	0.208478	0.601683	NA	NA	NA	NA
Smoking-Num	PMR	Simple mode	24	0.628041	0.447404	0.173753	NA	NA	NA	NA
Smoking-Num	PMR	Simple mode (NOME)	24	0.628041	0.417508	0.146124	NA	NA	NA	NA
Smoking-Num	PMR	MR Egger Intercept	24	0.0202482	0.00905551	0.0358172	NA	NA	NA	NA
Alcohol	PMR	Inverse variance weighted	48	0.0899585	0.175624	0.608496	56.88666309539243	47	0.1530125803280011	77.47829237304924
Alcohol	PMR	IVW radial	48	0.0899572	0.175625	0.608502	NA	NA	NA	NA
Alcohol	PMR	MR Egger	48	0.270975	0.256554	0.296389	55.74994073317019	46	0.1536597289787401	NA
Alcohol	PMR	Weighted median	48	0.308802	0.249421	0.215688	NA	NA	NA	NA
Alcohol	PMR	Weighted mode	48	0.29677	0.246339	0.234342	NA	NA	NA	NA
Alcohol	PMR	Weighted mode (NOME)	48	0.29677	0.24652	0.23468	NA	NA	NA	NA
Alcohol	PMR	Simple mode	48	0.235963	0.477703	0.62364	NA	NA	NA	NA
Alcohol	PMR	Simple mode (NOME)	48	0.235963	0.519021	0.651468	NA	NA	NA	NA
Alcohol	PMR	MR Egger Intercept	48	-0.00549063	0.00566942	0.337877	NA	NA	NA	NA
PA	PMR	Inverse variance weighted	21	-0.314787	0.238577	0.187023	33.25254276215093	20	0.03164857427053236	37.58753626089727
PA	PMR	IVW radial	21	-0.314438	0.238583	0.187524	NA	NA	NA	NA
PA	PMR	MR Egger	21	-0.763817	1.0914	0.4925	32.94365337483627	19	0.02440236177896853	NA
PA	PMR	Weighted median	21	-0.319228	0.258066	0.216087	NA	NA	NA	NA
PA	PMR	Weighted mode	21	-0.406361	0.357117	0.268613	NA	NA	NA	NA
PA	PMR	Weighted mode (NOME)	21	-0.420401	0.368641	0.267589	NA	NA	NA	NA
PA	PMR	Simple mode	21	-0.33616	0.445593	0.459395	NA	NA	NA	NA
PA	PMR	Simple mode (NOME)	21	-0.33616	0.42546	0.438733	NA	NA	NA	NA
PA	PMR	MR Egger Intercept	21	0.0115893	0.0274577	0.677706	NA	NA	NA	NA
BMI	psoriasis	Inverse variance weighted	900	0.280201	0.0321956	3.23063e-18	1182.8109118933337	899	4.953266188726866e-10	61.381585770077265
BMI	psoriasis	IVW radial	900	0.280207	0.0321956	3.22427e-18	NA	NA	NA	NA
BMI	psoriasis	MR Egger	900	0.25776	0.0918106	0.00510057	1182.721184869628	898	4.348350881702355e-10	NA
BMI	psoriasis	Weighted median	900	0.193794	0.0498521	0.000101337	NA	NA	NA	NA
BMI	psoriasis	Weighted mode	900	0.0596893	0.108361	0.581881	NA	NA	NA	NA
BMI	psoriasis	Weighted mode (NOME)	900	0.0596893	0.105346	0.571126	NA	NA	NA	NA
BMI	psoriasis	Simple mode	900	-0.00229991	0.177467	0.989663	NA	NA	NA	NA
BMI	psoriasis	Simple mode (NOME)	900	-0.00229991	0.208336	0.991194	NA	NA	NA	NA
BMI	psoriasis	MR Egger Intercept	900	0.000356182	0.00136462	0.794144	NA	NA	NA	NA
WHR	psoriasis	Inverse variance weighted	537	0.312964	0.0486909	1.29651e-10	1048.066181305154	536	1.8087567606573898e-35	56.5410021743041
WHR	psoriasis	IVW radial	537	0.31298	0.0486986	1.30244e-10	NA	NA	NA	NA
WHR	psoriasis	MR Egger	537	0.350493	0.131726	0.00803035	1047.881991348651	535	1.3491415862302085e-35	NA
WHR	psoriasis	Weighted median	537	0.260275	0.0633932	4.03047e-05	NA	NA	NA	NA
WHR	psoriasis	Weighted mode	537	0.242452	0.118425	0.0411151	NA	NA	NA	NA
WHR	psoriasis	Weighted mode (NOME)	537	0.242452	0.116244	0.0374771	NA	NA	NA	NA
WHR	psoriasis	Simple mode	537	0.425874	0.191348	0.026453	NA	NA	NA	NA
WHR	psoriasis	Simple mode (NOME)	537	0.425874	0.200782	0.0343738	NA	NA	NA	NA
WHR	psoriasis	MR Egger Intercept	537	-0.000629083	0.00205142	0.759223	NA	NA	NA	NA
SBP	psoriasis	Inverse variance weighted	693	0.00155713	0.00236987	0.511148	1346.5681105613053	692	1.783837143864933e-44	67.396425033288807
SBP	psoriasis	IVW radial	693	0.00155713	0.00236987	0.511149	NA	NA	NA	NA
SBP	psoriasis	MR Egger	693	0.00336704	0.00619805	0.587139	1346.3734712752296	691	1.3377375088370694e-44	NA
SBP	psoriasis	Weighted median	693	0.00237091	0.00277246	0.392461	NA	NA	NA	NA
SBP	psoriasis	Weighted mode	693	0.00387122	0.00595942	0.516168	NA	NA	NA	NA
SBP	psoriasis	Weighted mode (NOME)	693	0.00387122	0.00556412	0.48682	NA	NA	NA	NA
SBP	psoriasis	Simple mode	693	0.0116954	0.00959692	0.223387	NA	NA	NA	NA
SBP	psoriasis	Simple mode (NOME)	693	0.0116954	0.00998447	0.241856	NA	NA	NA	NA
SBP	psoriasis	MR Egger Intercept	693	-0.000568046	0.00179726	0.752051	NA	NA	NA	NA
Lipids-LDL	psoriasis	Inverse variance weighted	542	0.0528504	0.0258364	0.0407977	859.7652789962564	541	6.430125208067571e-17	252.3050634648147
Lipids-LDL	psoriasis	IVW radial	542	0.05285	0.0258364	0.0407997	NA	NA	NA	NA
Lipids-LDL	psoriasis	MR Egger	542	0.101596	0.0319557	0.00156113	849.3970866279014	540	3.53512496087076e-16	NA
Lipids-LDL	psoriasis	Weighted median	542	0.0790054	0.0358408	0.0275003	NA	NA	NA	NA
Lipids-LDL	psoriasis	Weighted mode	542	0.0820584	0.0274927	0.00296654	NA	NA	NA	NA
Lipids-LDL	psoriasis	Weighted mode (NOME)	542	0.0820584	0.0265159	0.00207211	NA	NA	NA	NA
Lipids-LDL	psoriasis	Simple mode	542	0.0584156	0.116342	0.615799	NA	NA	NA	NA
Lipids-LDL	psoriasis	Simple mode (NOME)	542	0.0584156	0.115097	0.611987	NA	NA	NA	NA
Lipids-LDL	psoriasis	MR Egger Intercept	542	-0.00246053	0.000958376	0.0105146	NA	NA	NA	NA
Lipids-HDL	psoriasis	Inverse variance weighted	809	-0.0816458	0.0314876	0.00951568	1675.736904478572	808	6.653181431774175e-63	158.3054665622365
Lipids-HDL	psoriasis	IVW radial	809	-0.0816445	0.0314877	0.00951709	NA	NA	NA	NA
Lipids-HDL	psoriasis	MR Egger	809	-0.00481165	0.0437109	0.912374	1662.598528658888	807	1.3929270210132105e-61	NA
Lipids-HDL	psoriasis	Weighted median	809	-0.0632864	0.0476384	0.184021	NA	NA	NA	NA
Lipids-HDL	psoriasis	Weighted mode	809	-0.030603	0.0378628	0.41918	NA	NA	NA	NA
Lipids-HDL	psoriasis	Weighted mode (NOME)	809	-0.030603	0.0373516	0.412844	NA	NA	NA	NA
Lipids-HDL	psoriasis	Simple mode	809	-0.030603	0.11908	0.797248	NA	NA	NA	NA
Lipids-HDL	psoriasis	Simple mode (NOME)	809	-0.030603	0.11841	0.796127	NA	NA	NA	NA
Lipids-HDL	psoriasis	MR Egger Intercept	809	-0.00242666	0.000960938	0.0117502	NA	NA	NA	NA
Lipids-Trig	psoriasis	Inverse variance weighted	698	0.0848959	0.0320415	0.00805967	1184.681367016703	697	7.335297649394314e-28	158.66251483731074
Lipids-Trig	psoriasis	IVW radial	698	0.0848971	0.0320415	0.00805878	NA	NA	NA	NA
Lipids-Trig	psoriasis	MR Egger	698	0.011813	0.0447756	0.791991	1175.5200525480136	696	3.7415569343273116e-27	NA
Lipids-Trig	psoriasis	Weighted median	698	0.0521804	0.0547417	0.340483	NA	NA	NA	NA
Lipids-Trig	psoriasis	Weighted mode	698	0.000385493	0.0392243	0.992161	NA	NA	NA	NA
Lipids-Trig	psoriasis	Weighted mode (NOME)	698	0.000385493	0.042206	0.992715	NA	NA	NA	NA
Lipids-Trig	psoriasis	Simple mode	698	0.0583245	0.126605	0.645172	NA	NA	NA	NA
Lipids-Trig	psoriasis	Simple mode (NOME)	698	0.0583245	0.134139	0.663837	NA	NA	NA	NA
Lipids-Trig	psoriasis	MR Egger Intercept	698	0.0022505	0.000966296	0.0201447	NA	NA	NA	NA
Education	psoriasis	Inverse variance weighted	674	-0.345246	0.0441957	5.63925e-15	1071.1536129285064	673	1.0462939849521907e-20	48.04092571448103
Education	psoriasis	IVW radial	674	-0.34524	0.0441993	5.67476e-15	NA	NA	NA	NA
Education	psoriasis	MR Egger	674	-0.33945	0.162267	0.0368206	1071.1514154705023	672	8.267408936719406e-21	NA
Education	psoriasis	Weighted median	674	-0.275715	0.0553274	6.24989e-07	NA	NA	NA	NA
Education	psoriasis	Weighted mode	674	-0.233757	0.159707	0.143753	NA	NA	NA	NA
Education	psoriasis	Weighted mode (NOME)	674	-0.233757	0.169566	0.168489	NA	NA	NA	NA
Education	psoriasis	Simple mode	674	-0.417127	0.198628	0.0360967	NA	NA	NA	NA
Education	psoriasis	Simple mode (NOME)	674	-0.417127	0.195347	0.0330959	NA	NA	NA	NA
Education	psoriasis	MR Egger Intercept	674	-8.4336e-05	0.0022714	0.970393	NA	NA	NA	NA
Smoking-Ever	psoriasis	Inverse variance weighted	53	0.586379	0.139025	2.46716e-05	59.83245350202395	52	0.21266935515722143	41.74075276635933
Smoking-Ever	psoriasis	IVW radial	53	0.586145	0.13907	2.50077e-05	NA	NA	NA	NA
Smoking-Ever	psoriasis	MR Egger	53	0.719158	0.645232	0.270258	59.78035094649678	51	0.18696212672920492	NA
Smoking-Ever	psoriasis	Weighted median	53	0.525699	0.18918	0.0054556	NA	NA	NA	NA
Smoking-Ever	psoriasis	Weighted mode	53	0.383835	0.432552	0.378964	NA	NA	NA	NA
Smoking-Ever	psoriasis	Weighted mode (NOME)	53	0.383835	0.394331	0.334869	NA	NA	NA	NA
Smoking-Ever	psoriasis	Simple mode	53	0.494284	0.424655	0.249751	NA	NA	NA	NA
Smoking-Ever	psoriasis	Simple mode (NOME)	53	0.494284	0.446807	0.273706	NA	NA	NA	NA
Smoking-Ever	psoriasis	MR Egger Intercept	53	-0.00172163	0.0081659	0.833859	NA	NA	NA	NA
Smoking-Num	psoriasis	Inverse variance weighted	24	0.064196	0.0849003	0.449569	23.657110014628515	23	0.4229939409514853	96.63299420801324
Smoking-Num	psoriasis	IVW radial	24	0.064193	0.0849007	0.449592	NA	NA	NA	NA
Smoking-Num	psoriasis	MR Egger	24	0.0209244	0.156907	0.895124	23.540091415247517	22	0.3717898031035567	NA
Smoking-Num	psoriasis	Weighted median	24	0.0306206	0.113991	0.788219	NA	NA	NA	NA
Smoking-Num	psoriasis	Weighted mode	24	0.0385199	0.111142	0.732056	NA	NA	NA	NA
Smoking-Num	psoriasis	Weighted mode (NOME)	24	0.0385199	0.110433	0.730406	NA	NA	NA	NA
Smoking-Num	psoriasis	Simple mode	24	0.0980663	0.232072	0.676535	NA	NA	NA	NA
Smoking-Num	psoriasis	Simple mode (NOME)	24	0.0980663	0.215484	0.653306	NA	NA	NA	NA
Smoking-Num	psoriasis	MR Egger Intercept	24	0.00169246	0.00511781	0.744	NA	NA	NA	NA
Alcohol	psoriasis	Inverse variance weighted	48	0.167259	0.117225	0.153634	69.49447891617629	47	0.01811052920994347	77.47829237304924
Alcohol	psoriasis	IVW radial	48	0.167236	0.117225	0.153688	NA	NA	NA	NA
Alcohol	psoriasis	MR Egger	48	0.0732414	0.181534	0.688481	68.80064095013583	46	0.01632090600681269	NA
Alcohol	psoriasis	Weighted median	48	0.357191	0.15705	0.0229432	NA	NA	NA	NA
Alcohol	psoriasis	Weighted mode	48	0.315749	0.162232	0.0576126	NA	NA	NA	NA
Alcohol	psoriasis	Weighted mode (NOME)	48	0.315749	0.165742	0.0629009	NA	NA	NA	NA
Alcohol	psoriasis	Simple mode	48	-0.454578	0.370767	0.226288	NA	NA	NA	NA
Alcohol	psoriasis	Simple mode (NOME)	48	-0.454578	0.363717	0.217556	NA	NA	NA	NA
Alcohol	psoriasis	MR Egger Intercept	48	0.00249622	0.00366498	0.499222	NA	NA	NA	NA
PA	psoriasis	Inverse variance weighted	17	-0.147774	0.133127	0.26699	21.43368213822602	16	0.16243623719932165	38.81226906791864
PA	psoriasis	IVW radial	17	-0.147901	0.133152	0.266668	NA	NA	NA	NA
PA	psoriasis	MR Egger	17	0.851182	0.557902	0.147895	17.498446874516596	15	0.289950161459839	NA
PA	psoriasis	Weighted median	17	-0.239983	0.175693	0.171963	NA	NA	NA	NA
PA	psoriasis	Weighted mode	17	-0.20589	0.301074	0.503854	NA	NA	NA	NA
PA	psoriasis	Weighted mode (NOME)	17	-0.20589	0.330386	0.541949	NA	NA	NA	NA
PA	psoriasis	Simple mode	17	-0.261996	0.316952	0.420613	NA	NA	NA	NA
PA	psoriasis	Simple mode (NOME)	17	-0.261996	0.330729	0.439844	NA	NA	NA	NA
PA	psoriasis	MR Egger Intercept	17	-0.0253745	0.0138155	0.0861544	NA	NA	NA	NA
BMI	RA	Inverse variance weighted	861	0.290541	0.0351665	1.43385e-16	1881.5142814557871	860	3.914549738787586e-78	61.16482150709034
BMI	RA	IVW radial	861	0.290594	0.0351709	1.42836e-16	NA	NA	NA	NA
BMI	RA	MR Egger	861	0.38069	0.100708	0.000167575	1879.517533831963	859	4.552505555989024e-78	NA
BMI	RA	Weighted median	861	0.262781	0.0484802	5.94752e-08	NA	NA	NA	NA
BMI	RA	Weighted mode	861	0.264075	0.0865687	0.00235499	NA	NA	NA	NA
BMI	RA	Weighted mode (NOME)	861	0.264075	0.0805399	0.00108434	NA	NA	NA	NA
BMI	RA	Simple mode	861	0.348066	0.153018	0.0231707	NA	NA	NA	NA
BMI	RA	Simple mode (NOME)	861	0.348066	0.163602	0.0336612	NA	NA	NA	NA
BMI	RA	MR Egger Intercept	861	-0.0014365	0.00150373	0.3397	NA	NA	NA	NA
WHR	RA	Inverse variance weighted	517	0.255609	0.0621664	3.92766e-05	2228.243439578001	516	9.444613004207345e-211	56.85382261459805
WHR	RA	IVW radial	517	0.255668	0.0621766	3.92306e-05	NA	NA	NA	NA
WHR	RA	MR Egger	517	0.245059	0.16926	0.148274	2228.2240009125567	515	4.569758209047676e-211	NA
WHR	RA	Weighted median	517	0.176943	0.0514692	0.000586378	NA	NA	NA	NA
WHR	RA	Weighted mode	517	0.364406	0.120242	0.00256313	NA	NA	NA	NA
WHR	RA	Weighted mode (NOME)	517	0.364406	0.131602	0.00582526	NA	NA	NA	NA
WHR	RA	Simple mode	517	0.492608	0.18687	0.00863908	NA	NA	NA	NA
WHR	RA	Simple mode (NOME)	517	0.492608	0.183527	0.00750577	NA	NA	NA	NA
WHR	RA	MR Egger Intercept	517	0.000175751	0.00262205	0.946585	NA	NA	NA	NA
SBP	RA	Inverse variance weighted	659	0.00885206	0.00313615	0.0047638	3129.202124653618	658	8.988621000000001e-301	67.51978146789104
SBP	RA	IVW radial	659	0.0088519	0.00313612	0.00476409	NA	NA	NA	NA
SBP	RA	MR Egger	659	0.0176975	0.00823667	0.0320285	3122.7914974507403	657	5.18827747e-299	NA
SBP	RA	Weighted median	659	0.00290943	0.00242803	0.230812	NA	NA	NA	NA
SBP	RA	Weighted mode	659	0.00281545	0.00550368	0.609132	NA	NA	NA	NA
SBP	RA	Weighted mode (NOME)	659	0.00281545	0.0051115	0.581954	NA	NA	NA	NA
SBP	RA	Simple mode	659	-0.0122672	0.00808401	0.129631	NA	NA	NA	NA
SBP	RA	Simple mode (NOME)	659	-0.0122672	0.00827305	0.13861	NA	NA	NA	NA
SBP	RA	MR Egger Intercept	659	-0.00278336	0.00239667	0.245923	NA	NA	NA	NA
Lipids-LDL	RA	Inverse variance weighted	517	0.0115806	0.0304955	0.704133	1453.360877899289	516	4.146459898691727e-90	256.914951214744
Lipids-LDL	RA	IVW radial	517	0.0115806	0.0304955	0.704132	NA	NA	NA	NA
Lipids-LDL	RA	MR Egger	517	-0.0219803	0.0382917	0.566204	1447.479340100106	515	1.6524206672493098e-89	NA
Lipids-LDL	RA	Weighted median	517	-0.0232058	0.031613	0.462913	NA	NA	NA	NA
Lipids-LDL	RA	Weighted mode	517	2.25904e-05	0.0264498	0.999319	NA	NA	NA	NA
Lipids-LDL	RA	Weighted mode (NOME)	517	2.25904e-05	0.0254956	0.999293	NA	NA	NA	NA
Lipids-LDL	RA	Simple mode	517	0.417669	0.103437	6.21221e-05	NA	NA	NA	NA
Lipids-LDL	RA	Simple mode (NOME)	517	0.417669	0.105718	8.87336e-05	NA	NA	NA	NA
Lipids-LDL	RA	MR Egger Intercept	517	0.00160229	0.00110764	0.148623	NA	NA	NA	NA
Lipids-HDL	RA	Inverse variance weighted	767	-0.0670686	0.0335761	0.0457694	2460.099349425351	766	1.4791387411584269e-176	155.83041416971034
Lipids-HDL	RA	IVW radial	767	-0.0670689	0.033576	0.0457686	NA	NA	NA	NA
Lipids-HDL	RA	MR Egger	767	0.0646701	0.0466517	0.166079	2409.067978232944	765	3.37605019828656e-169	NA
Lipids-HDL	RA	Weighted median	767	-0.0235816	0.037746	0.532139	NA	NA	NA	NA
Lipids-HDL	RA	Weighted mode	767	0.0286156	0.0293314	0.329573	NA	NA	NA	NA
Lipids-HDL	RA	Weighted mode (NOME)	767	0.0286156	0.0306029	0.35005	NA	NA	NA	NA
Lipids-HDL	RA	Simple mode	767	0.238905	0.0925664	0.0100393	NA	NA	NA	NA
Lipids-HDL	RA	Simple mode (NOME)	767	0.238905	0.0904577	0.00843304	NA	NA	NA	NA
Lipids-HDL	RA	MR Egger Intercept	767	-0.00410495	0.00101972	6.25012e-05	NA	NA	NA	NA
Lipids-Trig	RA	Inverse variance weighted	675	0.0125498	0.0333076	0.706334	1826.898208001905	674	4.935767204003121e-107	161.7346735793755
Lipids-Trig	RA	IVW radial	675	0.0125498	0.0333076	0.706333	NA	NA	NA	NA
Lipids-Trig	RA	MR Egger	675	-0.0723194	0.0463307	0.119009	1808.407918740127	673	1.0266764856852758e-104	NA
Lipids-Trig	RA	Weighted median	675	-0.00755608	0.0419174	0.856948	NA	NA	NA	NA
Lipids-Trig	RA	Weighted mode	675	-0.00279123	0.0304096	0.926894	NA	NA	NA	NA
Lipids-Trig	RA	Weighted mode (NOME)	675	-0.00279123	0.0321019	0.930738	NA	NA	NA	NA
Lipids-Trig	RA	Simple mode	675	0.199925	0.0969854	0.0396481	NA	NA	NA	NA
Lipids-Trig	RA	Simple mode (NOME)	675	0.199925	0.105436	0.0583633	NA	NA	NA	NA
Lipids-Trig	RA	MR Egger Intercept	675	0.00269286	0.00102656	0.00890815	NA	NA	NA	NA
Education	RA	Inverse variance weighted	644	-0.620557	0.0502819	5.41037e-35	1799.3805109571804	643	4.661626126509803e-110	48.39631663592272
Education	RA	IVW radial	644	-0.620863	0.0502998	5.29833e-35	NA	NA	NA	NA
Education	RA	MR Egger	644	-0.646117	0.183088	0.000446943	1799.3214208888496	642	2.8344978748965513e-110	NA
Education	RA	Weighted median	644	-0.551435	0.0477351	7.21509e-31	NA	NA	NA	NA
Education	RA	Weighted mode	644	-0.680404	0.196962	0.000587554	NA	NA	NA	NA
Education	RA	Weighted mode (NOME)	644	-0.723965	0.200946	0.000339135	NA	NA	NA	NA
Education	RA	Simple mode	644	-0.723965	0.198701	0.000290658	NA	NA	NA	NA
Education	RA	Simple mode (NOME)	644	-0.723965	0.207525	0.000518749	NA	NA	NA	NA
Education	RA	MR Egger Intercept	644	0.000373153	0.0025699	0.884598	NA	NA	NA	NA
Smoking-Ever	RA	Inverse variance weighted	52	0.487919	0.150655	0.00120091	92.22377289850772	51	3.6129120896731846e-4	40.51206116476272
Smoking-Ever	RA	IVW radial	52	0.488002	0.150683	0.00120118	NA	NA	NA	NA
Smoking-Ever	RA	MR Egger	52	0.132375	0.693675	0.849431	91.71765410292664	50	2.9423712632586663e-4	NA
Smoking-Ever	RA	Weighted median	52	0.231379	0.168526	0.169766	NA	NA	NA	NA
Smoking-Ever	RA	Weighted mode	52	0.160553	0.350307	0.64867	NA	NA	NA	NA
Smoking-Ever	RA	Weighted mode (NOME)	52	0.176591	0.405171	0.66479	NA	NA	NA	NA
Smoking-Ever	RA	Simple mode	52	0.208667	0.427427	0.627505	NA	NA	NA	NA
Smoking-Ever	RA	Simple mode (NOME)	52	0.208667	0.447361	0.642887	NA	NA	NA	NA
Smoking-Ever	RA	MR Egger Intercept	52	0.00462602	0.0088069	0.601715	NA	NA	NA	NA
Smoking-Num	RA	Inverse variance weighted	22	0.155912	0.117781	0.185587	63.77404820514761	21	3.372478425504e-6	102.43356666071271
Smoking-Num	RA	IVW radial	22	0.155957	0.117789	0.185491	NA	NA	NA	NA
Smoking-Num	RA	MR Egger	22	-0.30271	0.171073	0.0920607	41.62163647663973	20	0.00309712197985142	NA
Smoking-Num	RA	Weighted median	22	0.0696844	0.0949904	0.463197	NA	NA	NA	NA
Smoking-Num	RA	Weighted mode	22	0.0338307	0.0951043	0.725597	NA	NA	NA	NA
Smoking-Num	RA	Weighted mode (NOME)	22	0.0338307	0.0915062	0.715301	NA	NA	NA	NA
Smoking-Num	RA	Simple mode	22	0.531035	0.285478	0.0769276	NA	NA	NA	NA
Smoking-Num	RA	Simple mode (NOME)	22	0.531035	0.294097	0.0853312	NA	NA	NA	NA
Smoking-Num	RA	MR Egger Intercept	22	0.0187842	0.00575741	0.00389645	NA	NA	NA	NA
Alcohol	RA	Inverse variance weighted	47	0.110577	0.138006	0.422987	115.37385077876056	46	6.942710048072354e-8	78.4162215443334
Alcohol	RA	IVW radial	47	0.110562	0.138002	0.423037	NA	NA	NA	NA
Alcohol	RA	MR Egger	47	0.0313389	0.229476	0.891982	114.8920421759226	45	4.960209898526946e-8	NA
Alcohol	RA	Weighted median	47	0.00576769	0.134627	0.965827	NA	NA	NA	NA
Alcohol	RA	Weighted mode	47	-0.0358146	0.14771	0.809498	NA	NA	NA	NA
Alcohol	RA	Weighted mode (NOME)	47	-0.0358146	0.157113	0.820692	NA	NA	NA	NA
Alcohol	RA	Simple mode	47	0.17088	0.335163	0.6126	NA	NA	NA	NA
Alcohol	RA	Simple mode (NOME)	47	0.17088	0.344449	0.622189	NA	NA	NA	NA
Alcohol	RA	MR Egger Intercept	47	0.00193482	0.00445392	0.666068	NA	NA	NA	NA
PA	RA	Inverse variance weighted	15	-0.559494	0.136025	3.90259e-05	24.224040895095015	14	0.04304658685961747	39.74713737759799
PA	RA	IVW radial	15	-0.561274	0.136013	3.68137e-05	NA	NA	NA	NA
PA	RA	MR Egger	15	0.851922	0.579842	0.165551	16.42471552742442	13	0.2269537620039377	NA
PA	RA	Weighted median	15	-0.307469	0.159058	0.0532288	NA	NA	NA	NA
PA	RA	Weighted mode	15	-0.28549	0.212021	0.199532	NA	NA	NA	NA
PA	RA	Weighted mode (NOME)	15	-0.28549	0.221631	0.218583	NA	NA	NA	NA
PA	RA	Simple mode	15	-0.299477	0.297973	0.33193	NA	NA	NA	NA
PA	RA	Simple mode (NOME)	15	-0.299477	0.323967	0.370935	NA	NA	NA	NA
PA	RA	MR Egger Intercept	15	-0.0348081	0.0140097	0.0273734	NA	NA	NA	NA
AF	asthma	Inverse variance weighted	199	0.0366363	0.0110228	0.000888316	426.858	198	7.33338e-19	71.9735
AF	asthma	MR Egger	199	0.0148059	0.0237597	0.533905	424.54	197	9.32658e-19	NA
AF	asthma	Weighted median	199	0.0189086	0.0139821	0.176266	NA	NA	NA	NA
AF	asthma	Weighted mode	199	0.00729422	0.0193924	0.707218	NA	NA	NA	NA
AF	asthma	Weighted mode (NOME)	199	0.00729422	0.0182791	0.690288	NA	NA	NA	NA
AF	asthma	Simple mode	199	0.00729422	0.0323168	0.82166	NA	NA	NA	NA
AF	asthma	Simple mode (NOME)	199	0.00729422	0.0339023	0.829869	NA	NA	NA	NA
AF	asthma	MR Egger Intercept	199	0.00161633	0.00155848	0.300952	NA	NA	NA	NA
AF	asthma	Inverse variance weighted	192	0.0337562	0.0096855	0.000491715	311.373	191	8.40971e-08	71.9735
AF	asthma	MR Egger	192	0.0174388	0.0208044	0.402957	310.091	190	8.43599e-08	NA
AF	asthma	Weighted median	192	0.0188802	0.0132462	0.154061	NA	NA	NA	NA
AF	asthma	Weighted mode	192	0.00876696	0.0189213	0.64365	NA	NA	NA	NA
AF	asthma	Weighted mode (NOME)	192	0.00876696	0.020138	0.663804	NA	NA	NA	NA
AF	asthma	Simple mode	192	0.00573124	0.0337091	0.865174	NA	NA	NA	NA
AF	asthma	Simple mode (NOME)	192	0.00573124	0.0317364	0.856882	NA	NA	NA	NA
AF	asthma	MR Egger Intercept	192	0.00122392	0.00138083	0.376542	NA	NA	NA	NA
AF	COPD	Inverse variance weighted	198	0.0289054	0.0138119	0.0363679	308.156	197	6.82927e-07	71.9735
AF	COPD	MR Egger	198	0.052356	0.0299732	0.0822449	306.939	196	6.79665e-07	NA
AF	COPD	Weighted median	198	0.0441667	0.0207228	0.0330633	NA	NA	NA	NA
AF	COPD	Weighted mode	198	0.0558203	0.0361343	0.124	NA	NA	NA	NA
AF	COPD	Weighted mode (NOME)	198	0.0558203	0.0381763	0.145288	NA	NA	NA	NA
AF	COPD	Simple mode	198	0.0634374	0.0537575	0.239397	NA	NA	NA	NA
AF	COPD	Simple mode (NOME)	198	0.0634374	0.0514296	0.218867	NA	NA	NA	NA
AF	COPD	MR Egger Intercept	198	-0.00178087	0.00201982	0.37902	NA	NA	NA	NA
AF	COPD	Inverse variance weighted	196	0.029272	0.0130899	0.0253373	272.074	195	0.000220065	71.9735
AF	COPD	MR Egger	196	0.0532614	0.0284243	0.0624617	270.811	194	0.000222923	NA
AF	COPD	Weighted median	196	0.0441711	0.0200613	0.027679	NA	NA	NA	NA
AF	COPD	Weighted mode	196	0.0533885	0.0366949	0.147296	NA	NA	NA	NA
AF	COPD	Weighted mode (NOME)	196	0.0565141	0.037919	0.137737	NA	NA	NA	NA
AF	COPD	Simple mode	196	0.0627654	0.0490752	0.202429	NA	NA	NA	NA
AF	COPD	Simple mode (NOME)	196	0.0627654	0.0544052	0.250049	NA	NA	NA	NA
AF	COPD	MR Egger Intercept	196	-0.00183356	0.00192832	0.342858	NA	NA	NA	NA
AF	OA	Inverse variance weighted	199	-0.000128027	0.00789995	0.98707	485.72	198	3.46891e-26	71.9735
AF	OA	MR Egger	199	0.0023273	0.0149309	0.876294	485.627	197	2.26109e-26	NA
AF	OA	Weighted median	199	-0.000979831	0.0114426	0.931761	NA	NA	NA	NA
AF	OA	Weighted mode	199	-0.00304139	0.0110125	0.7827	NA	NA	NA	NA
AF	OA	Weighted mode (NOME)	199	-0.00304139	0.0120101	0.800348	NA	NA	NA	NA
AF	OA	Simple mode	199	0.018136	0.0293064	0.536733	NA	NA	NA	NA
AF	OA	Simple mode (NOME)	199	0.018136	0.02991	0.544975	NA	NA	NA	NA
AF	OA	MR Egger Intercept	199	-0.000205437	0.00105907	0.846392	NA	NA	NA	NA
AF	OA	Inverse variance weighted	195	-0.00234683	0.00723482	0.745651	386.242	194	7.3488e-15	71.9735
AF	OA	MR Egger	195	0.00814233	0.0135369	0.548219	384.566	193	7.90889e-15	NA
AF	OA	Weighted median	195	-0.000917125	0.0115381	0.936645	NA	NA	NA	NA
AF	OA	Weighted mode	195	-0.00241781	0.0111502	0.828562	NA	NA	NA	NA
AF	OA	Weighted mode (NOME)	195	-0.00241781	0.0115485	0.834386	NA	NA	NA	NA
AF	OA	Simple mode	195	0.0186653	0.0295349	0.528149	NA	NA	NA	NA
AF	OA	Simple mode (NOME)	195	0.0186653	0.0293062	0.524938	NA	NA	NA	NA
AF	OA	MR Egger Intercept	195	-0.00087885	0.000958476	0.360327	NA	NA	NA	NA
AF	PMR	Inverse variance weighted	198	0.0339181	0.026666	0.203387	201.281	197	0.402199	71.9735
AF	PMR	MR Egger	198	0.0479228	0.0551947	0.386319	201.195	196	0.384498	NA
AF	PMR	Weighted median	198	0.0472908	0.0506156	0.350143	NA	NA	NA	NA
AF	PMR	Weighted mode	198	0.0295975	0.0526144	0.57439	NA	NA	NA	NA
AF	PMR	Weighted mode (NOME)	198	0.0295975	0.0537452	0.582463	NA	NA	NA	NA
AF	PMR	Simple mode	198	-0.0124095	0.0988437	0.900219	NA	NA	NA	NA
AF	PMR	Simple mode (NOME)	198	-0.0124095	0.0972399	0.898582	NA	NA	NA	NA
AF	PMR	MR Egger Intercept	198	-0.00106998	0.00368953	0.772119	NA	NA	NA	NA
AF	PMR	Inverse variance weighted	198	0.0339181	0.026666	0.203387	201.281	197	0.402199	71.9735
AF	PMR	MR Egger	198	0.0479228	0.0551947	0.386319	201.195	196	0.384498	NA
AF	PMR	Weighted median	198	0.0472908	0.0496445	0.340798	NA	NA	NA	NA
AF	PMR	Weighted mode	198	0.0295975	0.0540992	0.584931	NA	NA	NA	NA
AF	PMR	Weighted mode (NOME)	198	0.0295975	0.0525548	0.573956	NA	NA	NA	NA
AF	PMR	Simple mode	198	-0.0124095	0.101519	0.902834	NA	NA	NA	NA
AF	PMR	Simple mode (NOME)	198	-0.0124095	0.103036	0.904258	NA	NA	NA	NA
AF	PMR	MR Egger Intercept	198	-0.00106998	0.00368953	0.772119	NA	NA	NA	NA
AF	psoriasis	Inverse variance weighted	198	0.0181937	0.0147674	0.217941	218.327	197	0.142027	71.9735
AF	psoriasis	MR Egger	198	-0.0215032	0.02886	0.457113	215.517	196	0.161524	NA
AF	psoriasis	Weighted median	198	0.0110035	0.0294908	0.709062	NA	NA	NA	NA
AF	psoriasis	Weighted mode	198	0.0165042	0.0279832	0.556006	NA	NA	NA	NA
AF	psoriasis	Weighted mode (NOME)	198	0.0165042	0.0293236	0.57419	NA	NA	NA	NA
AF	psoriasis	Simple mode	198	0.0491318	0.0545061	0.368476	NA	NA	NA	NA
AF	psoriasis	Simple mode (NOME)	198	0.0491318	0.0608419	0.420334	NA	NA	NA	NA
AF	psoriasis	MR Egger Intercept	198	0.00319465	0.00199823	0.111489	NA	NA	NA	NA
AF	psoriasis	Inverse variance weighted	198	0.0181937	0.0147674	0.217941	218.327	197	0.142027	71.9735
AF	psoriasis	MR Egger	198	-0.0215032	0.02886	0.457113	215.517	196	0.161524	NA
AF	psoriasis	Weighted median	198	0.0110035	0.0292706	0.706974	NA	NA	NA	NA
AF	psoriasis	Weighted mode	198	0.0165042	0.0288634	0.568107	NA	NA	NA	NA
AF	psoriasis	Weighted mode (NOME)	198	0.0165042	0.0285352	0.563667	NA	NA	NA	NA
AF	psoriasis	Simple mode	198	0.0491318	0.0561504	0.382637	NA	NA	NA	NA
AF	psoriasis	Simple mode (NOME)	198	0.0491318	0.0513929	0.340242	NA	NA	NA	NA
AF	psoriasis	MR Egger Intercept	198	0.00319465	0.00199823	0.111489	NA	NA	NA	NA
AF	RA	Inverse variance weighted	192	0.00771589	0.0160969	0.631697	338.164	191	2.80352e-10	72.1616
AF	RA	MR Egger	192	-0.0238106	0.0321584	0.45996	335.898	190	3.46921e-10	NA
AF	RA	Weighted median	192	0.0133131	0.0206882	0.519893	NA	NA	NA	NA
AF	RA	Weighted mode	192	-0.0359412	0.0282354	0.204597	NA	NA	NA	NA
AF	RA	Weighted mode (NOME)	192	-0.0359412	0.0291872	0.219687	NA	NA	NA	NA
AF	RA	Simple mode	192	0.0715994	0.0548682	0.193485	NA	NA	NA	NA
AF	RA	Simple mode (NOME)	192	0.0715994	0.056358	0.205473	NA	NA	NA	NA
AF	RA	MR Egger Intercept	192	0.00250366	0.00221142	0.258997	NA	NA	NA	NA
AF	RA	Inverse variance weighted	190	0.0131577	0.0148343	0.375091	283.034	189	1.10958e-05	72.1616
AF	RA	MR Egger	190	-0.0266335	0.0295095	0.367925	279.427	188	1.68514e-05	NA
AF	RA	Weighted median	190	0.0139856	0.0205649	0.496461	NA	NA	NA	NA
AF	RA	Weighted mode	190	-0.0367369	0.0282427	0.194924	NA	NA	NA	NA
AF	RA	Weighted mode (NOME)	190	-0.0367369	0.0275799	0.184458	NA	NA	NA	NA
AF	RA	Simple mode	190	0.0729791	0.0607886	0.231432	NA	NA	NA	NA
AF	RA	Simple mode (NOME)	190	0.0729791	0.059098	0.218407	NA	NA	NA	NA
AF	RA	MR Egger Intercept	190	0.00316778	0.00203342	0.120948	NA	NA	NA	NA
allergic_rhinitis	asthma	Inverse variance weighted	29	0.793763	0.0763373	2.52929e-25	215.386	28	8.10796e-31	46.7051
allergic_rhinitis	asthma	MR Egger	29	0.735014	0.266234	0.0102383	214.962	27	3.41303e-31	NA
allergic_rhinitis	asthma	Weighted median	29	0.678578	0.0650627	1.81648e-25	NA	NA	NA	NA
allergic_rhinitis	asthma	Weighted mode	29	0.618999	0.106535	3.05275e-06	NA	NA	NA	NA
allergic_rhinitis	asthma	Weighted mode (NOME)	29	0.720017	0.0812193	1.28183e-09	NA	NA	NA	NA
allergic_rhinitis	asthma	Simple mode	29	0.578592	0.143135	0.000375138	NA	NA	NA	NA
allergic_rhinitis	asthma	Simple mode (NOME)	29	0.578592	0.137877	0.000247631	NA	NA	NA	NA
allergic_rhinitis	asthma	MR Egger Intercept	29	0.00347887	0.0150795	0.819286	NA	NA	NA	NA
allergic_rhinitis	asthma	Inverse variance weighted	26	0.81544	0.0620073	1.68592e-39	104.239	25	1.20083e-11	46.7051
allergic_rhinitis	asthma	MR Egger	26	1.41339	0.223939	1.59216e-06	79.1936	24	8.17439e-08	NA
allergic_rhinitis	asthma	Weighted median	26	0.718404	0.0715956	1.07833e-23	NA	NA	NA	NA
allergic_rhinitis	asthma	Weighted mode	26	0.6469	0.083282	4.00502e-08	NA	NA	NA	NA
allergic_rhinitis	asthma	Weighted mode (NOME)	26	0.729907	0.0788555	1.48974e-09	NA	NA	NA	NA
allergic_rhinitis	asthma	Simple mode	26	0.602203	0.13723	0.000181903	NA	NA	NA	NA
allergic_rhinitis	asthma	Simple mode (NOME)	26	0.602203	0.114564	1.92195e-05	NA	NA	NA	NA
allergic_rhinitis	asthma	MR Egger Intercept	26	-0.0337542	0.0122519	0.0110193	NA	NA	NA	NA
allergic_rhinitis	COPD	Inverse variance weighted	31	0.275785	0.0475703	6.73416e-09	80.6804	30	1.57644e-06	45.6905
allergic_rhinitis	COPD	MR Egger	31	0.185204	0.156469	0.246165	79.6638	29	1.29734e-06	NA
allergic_rhinitis	COPD	Weighted median	31	0.290089	0.0520481	2.49704e-08	NA	NA	NA	NA
allergic_rhinitis	COPD	Weighted mode	31	0.333335	0.0913144	0.000988117	NA	NA	NA	NA
allergic_rhinitis	COPD	Weighted mode (NOME)	31	0.344025	0.0849218	0.000331771	NA	NA	NA	NA
allergic_rhinitis	COPD	Simple mode	31	0.340462	0.113158	0.00527294	NA	NA	NA	NA
allergic_rhinitis	COPD	Simple mode (NOME)	31	0.340462	0.104315	0.0027462	NA	NA	NA	NA
allergic_rhinitis	COPD	MR Egger Intercept	31	0.00545226	0.00896251	0.547697	NA	NA	NA	NA
allergic_rhinitis	COPD	Inverse variance weighted	31	0.275785	0.0475703	6.73416e-09	80.6804	30	1.57644e-06	45.6905
allergic_rhinitis	COPD	MR Egger	31	0.185204	0.156469	0.246165	79.6638	29	1.29734e-06	NA
allergic_rhinitis	COPD	Weighted median	31	0.290089	0.046496	4.4036e-10	NA	NA	NA	NA
allergic_rhinitis	COPD	Weighted mode	31	0.333335	0.0901835	0.000873552	NA	NA	NA	NA
allergic_rhinitis	COPD	Weighted mode (NOME)	31	0.344025	0.0806476	0.000183082	NA	NA	NA	NA
allergic_rhinitis	COPD	Simple mode	31	0.340462	0.104411	0.00276751	NA	NA	NA	NA
allergic_rhinitis	COPD	Simple mode (NOME)	31	0.340462	0.0953813	0.00122737	NA	NA	NA	NA
allergic_rhinitis	COPD	MR Egger Intercept	31	0.00545226	0.00896251	0.547697	NA	NA	NA	NA
allergic_rhinitis	OA	Inverse variance weighted	29	0.00584844	0.0248877	0.814214	81.7793	28	3.61538e-07	46.7051
allergic_rhinitis	OA	MR Egger	29	-0.10372	0.0843247	0.229304	76.5503	27	1.24459e-06	NA
allergic_rhinitis	OA	Weighted median	29	-0.0138391	0.0236604	0.558612	NA	NA	NA	NA
allergic_rhinitis	OA	Weighted mode	29	-0.0262286	0.0452951	0.567178	NA	NA	NA	NA
allergic_rhinitis	OA	Weighted mode (NOME)	29	-0.0283688	0.0454906	0.537926	NA	NA	NA	NA
allergic_rhinitis	OA	Simple mode	29	-0.0647521	0.0550754	0.249616	NA	NA	NA	NA
allergic_rhinitis	OA	Simple mode (NOME)	29	-0.0647521	0.0551547	0.250281	NA	NA	NA	NA
allergic_rhinitis	OA	MR Egger Intercept	29	0.00641611	0.0047245	0.185689	NA	NA	NA	NA
allergic_rhinitis	OA	Inverse variance weighted	28	-0.00627556	0.0213737	0.769055	56.6034	27	0.000721999	46.7051
allergic_rhinitis	OA	MR Egger	28	-0.0632222	0.0741035	0.401362	55.2334	26	0.00070796	NA
allergic_rhinitis	OA	Weighted median	28	-0.0144807	0.0249139	0.561087	NA	NA	NA	NA
allergic_rhinitis	OA	Weighted mode	28	-0.0246981	0.0451094	0.588522	NA	NA	NA	NA
allergic_rhinitis	OA	Weighted mode (NOME)	28	-0.0262305	0.0512234	0.612758	NA	NA	NA	NA
allergic_rhinitis	OA	Simple mode	28	-0.0676061	0.0583055	0.256398	NA	NA	NA	NA
allergic_rhinitis	OA	Simple mode (NOME)	28	-0.0676061	0.0593372	0.264563	NA	NA	NA	NA
allergic_rhinitis	OA	MR Egger Intercept	28	0.00337357	0.00420085	0.429216	NA	NA	NA	NA
allergic_rhinitis	PMR	Inverse variance weighted	31	0.124429	0.115776	0.282492	74.8712	30	1.04997e-05	45.6905
allergic_rhinitis	PMR	MR Egger	31	-0.260284	0.352864	0.466664	71.5873	29	1.83336e-05	NA
allergic_rhinitis	PMR	Weighted median	31	0.142255	0.121596	0.24204	NA	NA	NA	NA
allergic_rhinitis	PMR	Weighted mode	31	0.281304	0.253459	0.275877	NA	NA	NA	NA
allergic_rhinitis	PMR	Weighted mode (NOME)	31	0.281304	0.258533	0.285225	NA	NA	NA	NA
allergic_rhinitis	PMR	Simple mode	31	0.265698	0.258688	0.312585	NA	NA	NA	NA
allergic_rhinitis	PMR	Simple mode (NOME)	31	0.265698	0.249833	0.296041	NA	NA	NA	NA
allergic_rhinitis	PMR	MR Egger Intercept	31	0.0235613	0.0204278	0.258167	NA	NA	NA	NA
allergic_rhinitis	PMR	Inverse variance weighted	29	0.0348691	0.0946318	0.712522	44.4981	28	0.0247859	45.6905
allergic_rhinitis	PMR	MR Egger	29	-0.250555	0.287609	0.391345	42.7502	27	0.0277184	NA
allergic_rhinitis	PMR	Weighted median	29	0.122897	0.118999	0.301719	NA	NA	NA	NA
allergic_rhinitis	PMR	Weighted mode	29	0.274621	0.282314	0.339006	NA	NA	NA	NA
allergic_rhinitis	PMR	Weighted mode (NOME)	29	0.28116	0.281624	0.326658	NA	NA	NA	NA
allergic_rhinitis	PMR	Simple mode	29	0.261543	0.265686	0.333346	NA	NA	NA	NA
allergic_rhinitis	PMR	Simple mode (NOME)	29	0.261543	0.263256	0.328977	NA	NA	NA	NA
allergic_rhinitis	PMR	MR Egger Intercept	29	0.0176106	0.0167611	0.302718	NA	NA	NA	NA
allergic_rhinitis	psoriasis	Inverse variance weighted	31	-0.0661293	0.0678301	0.329597	71.1352	30	3.41547e-05	45.6905
allergic_rhinitis	psoriasis	MR Egger	31	0.204544	0.217802	0.355422	67.1828	29	7.29123e-05	NA
allergic_rhinitis	psoriasis	Weighted median	31	-0.0887337	0.066046	0.179106	NA	NA	NA	NA
allergic_rhinitis	psoriasis	Weighted mode	31	-0.0643192	0.0894782	0.47781	NA	NA	NA	NA
allergic_rhinitis	psoriasis	Weighted mode (NOME)	31	-0.0643192	0.08421	0.450954	NA	NA	NA	NA
allergic_rhinitis	psoriasis	Simple mode	31	-0.0134765	0.102069	0.895839	NA	NA	NA	NA
allergic_rhinitis	psoriasis	Simple mode (NOME)	31	-0.0134765	0.114805	0.907337	NA	NA	NA	NA
allergic_rhinitis	psoriasis	MR Egger Intercept	31	-0.0161938	0.0123979	0.201759	NA	NA	NA	NA
allergic_rhinitis	psoriasis	Inverse variance weighted	29	-0.0702607	0.0527114	0.182554	36.4545	28	0.131386	45.6905
allergic_rhinitis	psoriasis	MR Egger	29	0.200572	0.157833	0.214646	32.5024	27	0.213989	NA
allergic_rhinitis	psoriasis	Weighted median	29	-0.0879124	0.0668953	0.188786	NA	NA	NA	NA
allergic_rhinitis	psoriasis	Weighted mode	29	-0.0672565	0.0899281	0.460761	NA	NA	NA	NA
allergic_rhinitis	psoriasis	Weighted mode (NOME)	29	-0.0672565	0.0949246	0.484476	NA	NA	NA	NA
allergic_rhinitis	psoriasis	Simple mode	29	-0.0170928	0.113238	0.881101	NA	NA	NA	NA
allergic_rhinitis	psoriasis	Simple mode (NOME)	29	-0.0170928	0.10936	0.876919	NA	NA	NA	NA
allergic_rhinitis	psoriasis	MR Egger Intercept	29	-0.0161934	0.00893719	0.0811368	NA	NA	NA	NA
allergic_rhinitis	RA	Inverse variance weighted	29	0.080209	0.0756076	0.288754	127.326	28	1.27299e-14	46.6062
allergic_rhinitis	RA	MR Egger	29	-0.077846	0.254776	0.762293	125.363	27	1.26902e-14	NA
allergic_rhinitis	RA	Weighted median	29	0.102373	0.0607288	0.0918461	NA	NA	NA	NA
allergic_rhinitis	RA	Weighted mode	29	0.0700879	0.10472	0.508792	NA	NA	NA	NA
allergic_rhinitis	RA	Weighted mode (NOME)	29	0.0760511	0.112045	0.502865	NA	NA	NA	NA
allergic_rhinitis	RA	Simple mode	29	0.201279	0.130917	0.135407	NA	NA	NA	NA
allergic_rhinitis	RA	Simple mode (NOME)	29	0.201279	0.136807	0.152372	NA	NA	NA	NA
allergic_rhinitis	RA	MR Egger Intercept	29	0.00948691	0.0145886	0.520997	NA	NA	NA	NA
allergic_rhinitis	RA	Inverse variance weighted	25	0.0789455	0.0565706	0.162859	51.8634	24	0.000815112	46.6062
allergic_rhinitis	RA	MR Egger	25	-0.127892	0.182834	0.491258	48.8621	23	0.00129608	NA
allergic_rhinitis	RA	Weighted median	25	0.126111	0.061909	0.0416461	NA	NA	NA	NA
allergic_rhinitis	RA	Weighted mode	25	0.179435	0.117826	0.140859	NA	NA	NA	NA
allergic_rhinitis	RA	Weighted mode (NOME)	25	0.183374	0.122939	0.148836	NA	NA	NA	NA
allergic_rhinitis	RA	Simple mode	25	0.218827	0.138019	0.125946	NA	NA	NA	NA
allergic_rhinitis	RA	Simple mode (NOME)	25	0.218827	0.146573	0.148479	NA	NA	NA	NA
allergic_rhinitis	RA	MR Egger Intercept	25	0.012338	0.0103803	0.246727	NA	NA	NA	NA
asthma	COPD	Inverse variance weighted	161	0.385571	0.0248422	2.50876e-54	384.551	160	1.58971e-20	62.9624
asthma	COPD	MR Egger	161	0.238623	0.0576041	5.56571e-05	366.306	159	2.12045e-18	NA
asthma	COPD	Weighted median	161	0.319527	0.0270437	3.258e-32	NA	NA	NA	NA
asthma	COPD	Weighted mode	161	0.290593	0.0351272	4.8234e-14	NA	NA	NA	NA
asthma	COPD	Weighted mode (NOME)	161	0.3001	0.0351557	1.01515e-14	NA	NA	NA	NA
asthma	COPD	Simple mode	161	0.290593	0.061514	5.0279e-06	NA	NA	NA	NA
asthma	COPD	Simple mode (NOME)	161	0.290593	0.0613863	4.81889e-06	NA	NA	NA	NA
asthma	COPD	MR Egger Intercept	161	0.00782077	0.00277909	0.0055088	NA	NA	NA	NA
asthma	COPD	Inverse variance weighted	156	0.375572	0.0213621	3.42927e-69	268.281	155	4.38054e-08	62.9624
asthma	COPD	MR Egger	156	0.251435	0.0492762	9.74082e-07	255.442	154	5.16902e-07	NA
asthma	COPD	Weighted median	156	0.319517	0.0280656	4.98666e-30	NA	NA	NA	NA
asthma	COPD	Weighted mode	156	0.29407	0.0373414	5.54113e-13	NA	NA	NA	NA
asthma	COPD	Weighted mode (NOME)	156	0.29407	0.036468	1.87748e-13	NA	NA	NA	NA
asthma	COPD	Simple mode	156	0.285211	0.0566528	1.31618e-06	NA	NA	NA	NA
asthma	COPD	Simple mode (NOME)	156	0.285211	0.0721286	0.000116483	NA	NA	NA	NA
asthma	COPD	MR Egger Intercept	156	0.00667881	0.00240058	0.00607529	NA	NA	NA	NA
asthma	OA	Inverse variance weighted	161	0.0412853	0.0125487	0.00100189	406.059	160	2.41474e-23	62.9624
asthma	OA	MR Egger	161	-0.0261259	0.0296937	0.380271	390.744	159	1.59314e-21	NA
asthma	OA	Weighted median	161	0.025902	0.0135408	0.0557621	NA	NA	NA	NA
asthma	OA	Weighted mode	161	0.0327291	0.0161769	0.0447172	NA	NA	NA	NA
asthma	OA	Weighted mode (NOME)	161	0.0362301	0.0164777	0.0293324	NA	NA	NA	NA
asthma	OA	Simple mode	161	0.0537354	0.0316153	0.0911377	NA	NA	NA	NA
asthma	OA	Simple mode (NOME)	161	0.0537354	0.0343463	0.119672	NA	NA	NA	NA
asthma	OA	MR Egger Intercept	161	0.00357522	0.0014322	0.0135686	NA	NA	NA	NA
asthma	OA	Inverse variance weighted	156	0.0399617	0.0109455	0.000261236	292.427	155	1.65608e-10	62.9624
asthma	OA	MR Egger	156	-0.0153527	0.0258021	0.552705	282.221	154	1.36847e-09	NA
asthma	OA	Weighted median	156	0.0259201	0.0143611	0.071093	NA	NA	NA	NA
asthma	OA	Weighted mode	156	0.0345746	0.0177117	0.0527306	NA	NA	NA	NA
asthma	OA	Weighted mode (NOME)	156	0.0345746	0.0186539	0.0657144	NA	NA	NA	NA
asthma	OA	Simple mode	156	0.0542851	0.0326092	0.0979887	NA	NA	NA	NA
asthma	OA	Simple mode (NOME)	156	0.0542851	0.032853	0.100485	NA	NA	NA	NA
asthma	OA	MR Egger Intercept	156	0.0029686	0.0012579	0.0195307	NA	NA	NA	NA
asthma	PMR	Inverse variance weighted	161	0.150726	0.0530084	0.00446301	310.798	160	9.69778e-12	62.9624
asthma	PMR	MR Egger	161	0.220029	0.12398	0.0778592	310.051	159	8.2952e-12	NA
asthma	PMR	Weighted median	161	0.116794	0.0653803	0.0740377	NA	NA	NA	NA
asthma	PMR	Weighted mode	161	0.10958	0.13504	0.418305	NA	NA	NA	NA
asthma	PMR	Weighted mode (NOME)	161	0.10958	0.136891	0.424613	NA	NA	NA	NA
asthma	PMR	Simple mode	161	0.184968	0.181793	0.310468	NA	NA	NA	NA
asthma	PMR	Simple mode (NOME)	161	0.184968	0.177175	0.298068	NA	NA	NA	NA
asthma	PMR	MR Egger Intercept	161	-0.00378017	0.00611062	0.53705	NA	NA	NA	NA
asthma	PMR	Inverse variance weighted	159	0.0920719	0.0512369	0.0723381	261.414	158	4.31866e-07	62.9624
asthma	PMR	MR Egger	159	-0.0978868	0.129742	0.451694	257.259	157	7.80775e-07	NA
asthma	PMR	Weighted median	159	0.0677147	0.0678253	0.318101	NA	NA	NA	NA
asthma	PMR	Weighted mode	159	0.109687	0.117002	0.349943	NA	NA	NA	NA
asthma	PMR	Weighted mode (NOME)	159	0.109687	0.120764	0.365116	NA	NA	NA	NA
asthma	PMR	Simple mode	159	0.184818	0.181773	0.310827	NA	NA	NA	NA
asthma	PMR	Simple mode (NOME)	159	0.184818	0.172607	0.285917	NA	NA	NA	NA
asthma	PMR	MR Egger Intercept	159	0.00980875	0.0061603	0.113339	NA	NA	NA	NA
asthma	psoriasis	Inverse variance weighted	161	0.041258	0.0458141	0.367826	684.409	160	5.66081e-66	62.9624
asthma	psoriasis	MR Egger	161	0.0458356	0.109395	0.675787	684.4	159	2.72867e-66	NA
asthma	psoriasis	Weighted median	161	0.0751515	0.040644	0.0644551	NA	NA	NA	NA
asthma	psoriasis	Weighted mode	161	0.0769285	0.0620328	0.216745	NA	NA	NA	NA
asthma	psoriasis	Weighted mode (NOME)	161	0.0869177	0.0664542	0.192772	NA	NA	NA	NA
asthma	psoriasis	Simple mode	161	0.0869177	0.0880057	0.324821	NA	NA	NA	NA
asthma	psoriasis	Simple mode (NOME)	161	0.0869177	0.0861241	0.314396	NA	NA	NA	NA
asthma	psoriasis	MR Egger Intercept	161	-0.000242207	0.00525269	0.96328	NA	NA	NA	NA
asthma	psoriasis	Inverse variance weighted	148	0.121223	0.0346011	0.000459274	314.881	147	2.89316e-14	62.9624
asthma	psoriasis	MR Egger	148	0.16116	0.0803405	0.0467078	314.227	146	2.33856e-14	NA
asthma	psoriasis	Weighted median	148	0.0795512	0.0403907	0.0488907	NA	NA	NA	NA
asthma	psoriasis	Weighted mode	148	0.0758682	0.0652965	0.247158	NA	NA	NA	NA
asthma	psoriasis	Weighted mode (NOME)	148	0.0758682	0.0741287	0.307769	NA	NA	NA	NA
asthma	psoriasis	Simple mode	148	0.0842742	0.08996	0.3504	NA	NA	NA	NA
asthma	psoriasis	Simple mode (NOME)	148	0.0842742	0.0891964	0.346303	NA	NA	NA	NA
asthma	psoriasis	MR Egger Intercept	148	-0.00208247	0.00377882	0.582415	NA	NA	NA	NA
asthma	RA	Inverse variance weighted	151	0.299933	0.0516743	6.46362e-09	1163.74	150	2.71575e-156	63.2122
asthma	RA	MR Egger	151	0.56573	0.12104	6.55985e-06	1119.73	149	2.06265e-148	NA
asthma	RA	Weighted median	151	0.16902	0.0398363	2.20694e-05	NA	NA	NA	NA
asthma	RA	Weighted mode	151	-0.095421	0.154247	0.537101	NA	NA	NA	NA
asthma	RA	Weighted mode (NOME)	151	0.408067	0.235673	0.0854196	NA	NA	NA	NA
asthma	RA	Simple mode	151	0.427066	0.163808	0.0100528	NA	NA	NA	NA
asthma	RA	Simple mode (NOME)	151	0.427066	0.170181	0.0131529	NA	NA	NA	NA
asthma	RA	MR Egger Intercept	151	-0.0141909	0.00586422	0.0167286	NA	NA	NA	NA
asthma	RA	Inverse variance weighted	138	0.263475	0.0345782	2.54303e-14	359.57	137	6.93493e-22	63.2122
asthma	RA	MR Egger	138	0.270421	0.098147	0.00666833	359.555	136	4.25893e-22	NA
asthma	RA	Weighted median	138	0.299895	0.0386258	8.22215e-15	NA	NA	NA	NA
asthma	RA	Weighted mode	138	0.423877	0.0877108	3.56195e-06	NA	NA	NA	NA
asthma	RA	Weighted mode (NOME)	138	0.429604	0.0805843	3.91971e-07	NA	NA	NA	NA
asthma	RA	Simple mode	138	0.441059	0.137776	0.00170091	NA	NA	NA	NA
asthma	RA	Simple mode (NOME)	138	0.441059	0.132361	0.00110781	NA	NA	NA	NA
asthma	RA	MR Egger Intercept	138	-0.000327765	0.00433179	0.939797	NA	NA	NA	NA
coronary_heart	asthma	Inverse variance weighted	290	-0.0124804	0.0189307	0.509723	1073.95	289	1.03077e-90	64.1935
coronary_heart	asthma	MR Egger	290	-0.0634642	0.0419715	0.13161	1067.09	288	6.58932e-90	NA
coronary_heart	asthma	Weighted median	290	-0.0437499	0.0175859	0.0128544	NA	NA	NA	NA
coronary_heart	asthma	Weighted mode	290	-0.0621798	0.022054	0.0051434	NA	NA	NA	NA
coronary_heart	asthma	Weighted mode (NOME)	290	-0.0621798	0.0248595	0.012929	NA	NA	NA	NA
coronary_heart	asthma	Simple mode	290	-0.0468532	0.0510225	0.359236	NA	NA	NA	NA
coronary_heart	asthma	Simple mode (NOME)	290	-0.0468532	0.0508685	0.357785	NA	NA	NA	NA
coronary_heart	asthma	MR Egger Intercept	290	0.00228258	0.00167772	0.17473	NA	NA	NA	NA
coronary_heart	asthma	Inverse variance weighted	274	-0.00183624	0.0131623	0.889049	460.899	273	8.488e-12	64.1935
coronary_heart	asthma	MR Egger	274	-0.0904531	0.0280474	0.00141354	440.407	272	4.19804e-10	NA
coronary_heart	asthma	Weighted median	274	-0.0440498	0.0175572	0.0121096	NA	NA	NA	NA
coronary_heart	asthma	Weighted mode	274	-0.0639683	0.0261629	0.0151174	NA	NA	NA	NA
coronary_heart	asthma	Weighted mode (NOME)	274	-0.0684265	0.0226783	0.00279135	NA	NA	NA	NA
coronary_heart	asthma	Simple mode	274	-0.0461355	0.052076	0.376437	NA	NA	NA	NA
coronary_heart	asthma	Simple mode (NOME)	274	-0.0461355	0.0502003	0.358892	NA	NA	NA	NA
coronary_heart	asthma	MR Egger Intercept	274	0.00403431	0.00113404	0.000441586	NA	NA	NA	NA
coronary_heart	COPD	Inverse variance weighted	291	0.0621956	0.0238989	0.00925614	813.004	290	4.0569e-51	64.2382
coronary_heart	COPD	MR Egger	291	-0.115823	0.0509631	0.0237795	771.784	289	1.26828e-45	NA
coronary_heart	COPD	Weighted median	291	-0.0417992	0.0257486	0.104513	NA	NA	NA	NA
coronary_heart	COPD	Weighted mode	291	-0.0802014	0.0361309	0.0272092	NA	NA	NA	NA
coronary_heart	COPD	Weighted mode (NOME)	291	-0.0802014	0.03831	0.0371741	NA	NA	NA	NA
coronary_heart	COPD	Simple mode	291	-0.0305858	0.0886256	0.73026	NA	NA	NA	NA
coronary_heart	COPD	Simple mode (NOME)	291	-0.0305858	0.0928136	0.741986	NA	NA	NA	NA
coronary_heart	COPD	MR Egger Intercept	291	0.00820546	0.00208857	0.000106881	NA	NA	NA	NA
coronary_heart	COPD	Inverse variance weighted	279	0.0488164	0.0199701	0.0145062	506.321	278	1.66033e-15	64.2382
coronary_heart	COPD	MR Egger	279	-0.0968655	0.0428624	0.0246034	481.025	277	3.51908e-13	NA
coronary_heart	COPD	Weighted median	279	-0.0412304	0.0259048	0.111472	NA	NA	NA	NA
coronary_heart	COPD	Weighted mode	279	-0.080375	0.0388202	0.0393341	NA	NA	NA	NA
coronary_heart	COPD	Weighted mode (NOME)	279	-0.080375	0.0365563	0.0287259	NA	NA	NA	NA
coronary_heart	COPD	Simple mode	279	-0.0332858	0.0954562	0.727577	NA	NA	NA	NA
coronary_heart	COPD	Simple mode (NOME)	279	-0.0332858	0.0911923	0.715384	NA	NA	NA	NA
coronary_heart	COPD	MR Egger Intercept	279	0.00665989	0.00174495	0.000166892	NA	NA	NA	NA
coronary_heart	OA	Inverse variance weighted	291	0.00252886	0.0116511	0.828169	780.418	290	1.3674e-46	64.2382
coronary_heart	OA	MR Egger	291	-0.0639956	0.0261545	0.0150078	759.335	289	6.27002e-44	NA
coronary_heart	OA	Weighted median	291	-0.0276762	0.0173914	0.111526	NA	NA	NA	NA
coronary_heart	OA	Weighted mode	291	-0.0285477	0.0193339	0.140878	NA	NA	NA	NA
coronary_heart	OA	Weighted mode (NOME)	291	-0.032523	0.019747	0.100644	NA	NA	NA	NA
coronary_heart	OA	Simple mode	291	-0.0126464	0.0378907	0.738803	NA	NA	NA	NA
coronary_heart	OA	Simple mode (NOME)	291	-0.0126464	0.0428889	0.768309	NA	NA	NA	NA
coronary_heart	OA	MR Egger Intercept	291	0.00297359	0.00104974	0.00494043	NA	NA	NA	NA
coronary_heart	OA	Inverse variance weighted	284	-0.00764214	0.0103852	0.461809	582.932	283	5.91892e-23	64.2382
coronary_heart	OA	MR Egger	284	-0.0464545	0.0235797	0.0498043	576.079	282	2.43529e-22	NA
coronary_heart	OA	Weighted median	284	-0.0277289	0.0172765	0.108493	NA	NA	NA	NA
coronary_heart	OA	Weighted mode	284	-0.0311983	0.0202867	0.125198	NA	NA	NA	NA
coronary_heart	OA	Weighted mode (NOME)	284	-0.0311983	0.0194881	0.110518	NA	NA	NA	NA
coronary_heart	OA	Simple mode	284	-0.00954614	0.0409674	0.815916	NA	NA	NA	NA
coronary_heart	OA	Simple mode (NOME)	284	-0.00954614	0.0435789	0.826766	NA	NA	NA	NA
coronary_heart	OA	MR Egger Intercept	284	0.00173139	0.000945293	0.0680677	NA	NA	NA	NA
coronary_heart	PMR	Inverse variance weighted	291	0.15664	0.0406852	0.00011809	421.771	290	6.57712e-07	64.2382
coronary_heart	PMR	MR Egger	291	0.0707714	0.0916997	0.440879	420.184	289	7.00605e-07	NA
coronary_heart	PMR	Weighted median	291	0.057563	0.0643479	0.371023	NA	NA	NA	NA
coronary_heart	PMR	Weighted mode	291	0.0526405	0.0902867	0.560321	NA	NA	NA	NA
coronary_heart	PMR	Weighted mode (NOME)	291	0.0526405	0.0944613	0.577772	NA	NA	NA	NA
coronary_heart	PMR	Simple mode	291	0.206092	0.166126	0.215765	NA	NA	NA	NA
coronary_heart	PMR	Simple mode (NOME)	291	0.206092	0.16549	0.21401	NA	NA	NA	NA
coronary_heart	PMR	MR Egger Intercept	291	0.00391803	0.00374986	0.296966	NA	NA	NA	NA
coronary_heart	PMR	Inverse variance weighted	289	0.135053	0.0366463	0.000228431	338.012	288	0.0226671	64.2382
coronary_heart	PMR	MR Egger	289	0.0580243	0.0824034	0.48191	336.734	287	0.0230626	NA
coronary_heart	PMR	Weighted median	289	0.0502143	0.065911	0.446149	NA	NA	NA	NA
coronary_heart	PMR	Weighted mode	289	0.0555104	0.0946748	0.558115	NA	NA	NA	NA
coronary_heart	PMR	Weighted mode (NOME)	289	0.0555104	0.0964408	0.565341	NA	NA	NA	NA
coronary_heart	PMR	Simple mode	289	0.208749	0.184947	0.259965	NA	NA	NA	NA
coronary_heart	PMR	Simple mode (NOME)	289	0.208749	0.176279	0.237313	NA	NA	NA	NA
coronary_heart	PMR	MR Egger Intercept	289	0.00351602	0.00336907	0.297541	NA	NA	NA	NA
coronary_heart	psoriasis	Inverse variance weighted	291	0.110682	0.0261279	2.27375e-05	545.787	290	6.99421e-18	64.2382
coronary_heart	psoriasis	MR Egger	291	0.033562	0.0567148	0.554469	541.395	289	1.44077e-17	NA
coronary_heart	psoriasis	Weighted median	291	0.0866718	0.0433705	0.0456727	NA	NA	NA	NA
coronary_heart	psoriasis	Weighted mode	291	0.0461238	0.052556	0.380881	NA	NA	NA	NA
coronary_heart	psoriasis	Weighted mode (NOME)	291	0.0461238	0.0558455	0.40953	NA	NA	NA	NA
coronary_heart	psoriasis	Simple mode	291	0.0234011	0.0967888	0.809125	NA	NA	NA	NA
coronary_heart	psoriasis	Simple mode (NOME)	291	0.0234011	0.0982191	0.811852	NA	NA	NA	NA
coronary_heart	psoriasis	MR Egger Intercept	291	0.00359901	0.00235061	0.12684	NA	NA	NA	NA
coronary_heart	psoriasis	Inverse variance weighted	287	0.0887341	0.0222901	6.86618e-05	388.383	286	5.16117e-05	64.2382
coronary_heart	psoriasis	MR Egger	287	0.0520138	0.0484311	0.283742	387.391	285	5.03857e-05	NA
coronary_heart	psoriasis	Weighted median	287	0.0866603	0.0420034	0.039096	NA	NA	NA	NA
coronary_heart	psoriasis	Weighted mode	287	0.0499541	0.0522543	0.339889	NA	NA	NA	NA
coronary_heart	psoriasis	Weighted mode (NOME)	287	0.0499541	0.0494725	0.313476	NA	NA	NA	NA
coronary_heart	psoriasis	Simple mode	287	0.0172844	0.0991209	0.861693	NA	NA	NA	NA
coronary_heart	psoriasis	Simple mode (NOME)	287	0.0172844	0.101519	0.864928	NA	NA	NA	NA
coronary_heart	psoriasis	MR Egger Intercept	287	0.00172141	0.00201539	0.393749	NA	NA	NA	NA
coronary_heart	RA	Inverse variance weighted	278	0.0950462	0.0444168	0.0323653	1850.88	277	1.8162e-230	58.6849
coronary_heart	RA	MR Egger	278	-0.0959889	0.109133	0.379862	1826.62	276	2.13391e-226	NA
coronary_heart	RA	Weighted median	278	-0.0229197	0.029636	0.439301	NA	NA	NA	NA
coronary_heart	RA	Weighted mode	278	-0.0363571	0.0567826	0.522517	NA	NA	NA	NA
coronary_heart	RA	Weighted mode (NOME)	278	-0.0363571	0.0610098	0.551714	NA	NA	NA	NA
coronary_heart	RA	Simple mode	278	0.100129	0.0843229	0.236068	NA	NA	NA	NA
coronary_heart	RA	Simple mode (NOME)	278	0.100129	0.0810897	0.217953	NA	NA	NA	NA
coronary_heart	RA	MR Egger Intercept	278	0.00809031	0.00422564	0.0565803	NA	NA	NA	NA
coronary_heart	RA	Inverse variance weighted	265	0.0151374	0.0219607	0.490637	401.796	264	9.137e-08	58.6849
coronary_heart	RA	MR Egger	265	-0.174595	0.0523178	0.000968449	379.045	263	3.5427e-06	NA
coronary_heart	RA	Weighted median	265	-0.0226927	0.0294779	0.441406	NA	NA	NA	NA
coronary_heart	RA	Weighted mode	265	-0.0379	0.0581775	0.51532	NA	NA	NA	NA
coronary_heart	RA	Weighted mode (NOME)	265	-0.0434229	0.0593809	0.465268	NA	NA	NA	NA
coronary_heart	RA	Simple mode	265	0.111219	0.0894338	0.214755	NA	NA	NA	NA
coronary_heart	RA	Simple mode (NOME)	265	0.111219	0.0862433	0.198321	NA	NA	NA	NA
coronary_heart	RA	MR Egger Intercept	265	0.00797465	0.00200715	9.16642e-05	NA	NA	NA	NA
diabetes_type_2	asthma	Inverse variance weighted	455	0.0455423	0.0125069	0.000271193	1780.08	454	5.0052e-156	67.4492
diabetes_type_2	asthma	MR Egger	455	-0.031394	0.0257421	0.223267	1735.6	453	3.86094e-149	NA
diabetes_type_2	asthma	Weighted median	455	-0.00200912	0.0127687	0.874972	NA	NA	NA	NA
diabetes_type_2	asthma	Weighted mode	455	-0.035753	0.0233034	0.125666	NA	NA	NA	NA
diabetes_type_2	asthma	Weighted mode (NOME)	455	-0.035753	0.0228571	0.118468	NA	NA	NA	NA
diabetes_type_2	asthma	Simple mode	455	0.0268815	0.0501343	0.592091	NA	NA	NA	NA
diabetes_type_2	asthma	Simple mode (NOME)	455	0.0268815	0.0537931	0.617515	NA	NA	NA	NA
diabetes_type_2	asthma	MR Egger Intercept	455	0.00429389	0.00126015	0.000714255	NA	NA	NA	NA
diabetes_type_2	asthma	Inverse variance weighted	440	0.0409194	0.0101905	5.93302e-05	1055.12	439	1.21614e-52	67.4492
diabetes_type_2	asthma	MR Egger	440	-0.0244679	0.0219642	0.265895	1028.76	438	1.69739e-49	NA
diabetes_type_2	asthma	Weighted median	440	0.0155284	0.012158	0.201526	NA	NA	NA	NA
diabetes_type_2	asthma	Weighted mode	440	-0.0186877	0.0250264	0.455632	NA	NA	NA	NA
diabetes_type_2	asthma	Weighted mode (NOME)	440	-0.0224019	0.0254009	0.378294	NA	NA	NA	NA
diabetes_type_2	asthma	Simple mode	440	0.0258829	0.0480265	0.590208	NA	NA	NA	NA
diabetes_type_2	asthma	Simple mode (NOME)	440	0.0258829	0.0517391	0.617143	NA	NA	NA	NA
diabetes_type_2	asthma	MR Egger Intercept	440	0.0035376	0.00105596	0.000877627	NA	NA	NA	NA
diabetes_type_2	COPD	Inverse variance weighted	455	0.0629829	0.0151528	3.23148e-05	1084.82	454	1.48521e-53	67.4492
diabetes_type_2	COPD	MR Egger	455	-0.0160112	0.0333075	0.630955	1068.15	453	1.22717e-51	NA
diabetes_type_2	COPD	Weighted median	455	0.0390511	0.0208083	0.0605581	NA	NA	NA	NA
diabetes_type_2	COPD	Weighted mode	455	0.0342207	0.0267324	0.201156	NA	NA	NA	NA
diabetes_type_2	COPD	Weighted mode (NOME)	455	0.0342207	0.0292645	0.242872	NA	NA	NA	NA
diabetes_type_2	COPD	Simple mode	455	0.0861009	0.055027	0.118349	NA	NA	NA	NA
diabetes_type_2	COPD	Simple mode (NOME)	455	0.0861009	0.0578231	0.137171	NA	NA	NA	NA
diabetes_type_2	COPD	MR Egger Intercept	455	0.004204	0.00158125	0.0081232	NA	NA	NA	NA
diabetes_type_2	COPD	Inverse variance weighted	448	0.0490671	0.0140031	0.000458303	894.465	447	3.86108e-32	67.4492
diabetes_type_2	COPD	MR Egger	448	-0.0266769	0.0306916	0.38521	879.358	446	1.20188e-30	NA
diabetes_type_2	COPD	Weighted median	448	0.0385365	0.0212641	0.0699428	NA	NA	NA	NA
diabetes_type_2	COPD	Weighted mode	448	0.034952	0.0304146	0.251094	NA	NA	NA	NA
diabetes_type_2	COPD	Weighted mode (NOME)	448	0.034952	0.0290664	0.22981	NA	NA	NA	NA
diabetes_type_2	COPD	Simple mode	448	0.0817033	0.054917	0.13752	NA	NA	NA	NA
diabetes_type_2	COPD	Simple mode (NOME)	448	0.0817033	0.0572311	0.154104	NA	NA	NA	NA
diabetes_type_2	COPD	MR Egger Intercept	448	0.00403802	0.0014588	0.00587402	NA	NA	NA	NA
diabetes_type_2	OA	Inverse variance weighted	455	0.0235728	0.00892758	0.00827957	1609.48	454	7.45293e-129	67.4492
diabetes_type_2	OA	MR Egger	455	-0.0369029	0.0182042	0.0432307	1559.9	453	2.01717e-121	NA
diabetes_type_2	OA	Weighted median	455	-0.00968376	0.0107321	0.36689	NA	NA	NA	NA
diabetes_type_2	OA	Weighted mode	455	-0.0198466	0.0118902	0.0957751	NA	NA	NA	NA
diabetes_type_2	OA	Weighted mode (NOME)	455	-0.0232302	0.0117365	0.0483847	NA	NA	NA	NA
diabetes_type_2	OA	Simple mode	455	0.0478269	0.0286997	0.0963114	NA	NA	NA	NA
diabetes_type_2	OA	Simple mode (NOME)	455	0.0478269	0.0307694	0.120794	NA	NA	NA	NA
diabetes_type_2	OA	MR Egger Intercept	455	0.00334987	0.000882761	0.000167859	NA	NA	NA	NA
diabetes_type_2	OA	Inverse variance weighted	432	0.0198211	0.00727074	0.00640772	945.582	431	1.40356e-40	67.4492
diabetes_type_2	OA	MR Egger	432	-0.0266343	0.0147167	0.0710252	917.695	430	1.81696e-37	NA
diabetes_type_2	OA	Weighted median	432	-0.00267602	0.0106368	0.801365	NA	NA	NA	NA
diabetes_type_2	OA	Weighted mode	432	-0.020766	0.0118914	0.0814721	NA	NA	NA	NA
diabetes_type_2	OA	Weighted mode (NOME)	432	-0.020766	0.0124459	0.0959426	NA	NA	NA	NA
diabetes_type_2	OA	Simple mode	432	0.0537923	0.0284045	0.058921	NA	NA	NA	NA
diabetes_type_2	OA	Simple mode (NOME)	432	0.0537923	0.0296484	0.0703205	NA	NA	NA	NA
diabetes_type_2	OA	MR Egger Intercept	432	0.00258024	0.000713795	0.000336149	NA	NA	NA	NA
diabetes_type_2	PMR	Inverse variance weighted	455	0.0894068	0.0353847	0.0115138	1086.26	454	9.73869e-54	67.4492
diabetes_type_2	PMR	MR Egger	455	0.0441857	0.0724575	0.542289	1085.03	453	8.98626e-54	NA
diabetes_type_2	PMR	Weighted median	455	0.000299728	0.0480139	0.995019	NA	NA	NA	NA
diabetes_type_2	PMR	Weighted mode	455	-0.0193642	0.0525064	0.712451	NA	NA	NA	NA
diabetes_type_2	PMR	Weighted mode (NOME)	455	-0.0193642	0.0571804	0.735029	NA	NA	NA	NA
diabetes_type_2	PMR	Simple mode	455	0.0266387	0.118946	0.822892	NA	NA	NA	NA
diabetes_type_2	PMR	Simple mode (NOME)	455	0.0266387	0.112219	0.812468	NA	NA	NA	NA
diabetes_type_2	PMR	MR Egger Intercept	455	0.00254879	0.00356322	0.474788	NA	NA	NA	NA
diabetes_type_2	PMR	Inverse variance weighted	454	0.0413836	0.0247808	0.0949227	527.43	453	0.00887301	67.4492
diabetes_type_2	PMR	MR Egger	454	-0.0569288	0.0505053	0.260262	521.686	452	0.012867	NA
diabetes_type_2	PMR	Weighted median	454	0.000288412	0.0473198	0.995137	NA	NA	NA	NA
diabetes_type_2	PMR	Weighted mode	454	-0.0239104	0.0545331	0.661264	NA	NA	NA	NA
diabetes_type_2	PMR	Weighted mode (NOME)	454	-0.0239104	0.0545311	0.661253	NA	NA	NA	NA
diabetes_type_2	PMR	Simple mode	454	0.0163253	0.115417	0.887581	NA	NA	NA	NA
diabetes_type_2	PMR	Simple mode (NOME)	454	0.0163253	0.110021	0.882107	NA	NA	NA	NA
diabetes_type_2	PMR	MR Egger Intercept	454	0.00552623	0.00247713	0.0261779	NA	NA	NA	NA
diabetes_type_2	psoriasis	Inverse variance weighted	455	0.0734143	0.0184917	7.18379e-05	930.915	454	4.24587e-35	67.4492
diabetes_type_2	psoriasis	MR Egger	455	0.0165912	0.0393293	0.673332	925.446	453	1.21159e-34	NA
diabetes_type_2	psoriasis	Weighted median	455	0.0613259	0.0260997	0.0187896	NA	NA	NA	NA
diabetes_type_2	psoriasis	Weighted mode	455	0.0523387	0.034664	0.131767	NA	NA	NA	NA
diabetes_type_2	psoriasis	Weighted mode (NOME)	455	0.0523387	0.0362918	0.149946	NA	NA	NA	NA
diabetes_type_2	psoriasis	Simple mode	455	-0.0288926	0.0655302	0.659492	NA	NA	NA	NA
diabetes_type_2	psoriasis	Simple mode (NOME)	455	-0.0288926	0.0665923	0.664587	NA	NA	NA	NA
diabetes_type_2	psoriasis	MR Egger Intercept	455	0.00314044	0.00191937	0.102495	NA	NA	NA	NA
diabetes_type_2	psoriasis	Inverse variance weighted	450	0.0782592	0.014486	6.57519e-08	558.331	449	0.000324625	67.4492
diabetes_type_2	psoriasis	MR Egger	450	0.0253709	0.030671	0.408566	553.61	448	0.000473834	NA
diabetes_type_2	psoriasis	Weighted median	450	0.0613273	0.0250252	0.0142607	NA	NA	NA	NA
diabetes_type_2	psoriasis	Weighted mode	450	0.0531043	0.0340994	0.120094	NA	NA	NA	NA
diabetes_type_2	psoriasis	Weighted mode (NOME)	450	0.0531043	0.0315744	0.0932874	NA	NA	NA	NA
diabetes_type_2	psoriasis	Simple mode	450	-0.0409123	0.0633795	0.518925	NA	NA	NA	NA
diabetes_type_2	psoriasis	Simple mode (NOME)	450	-0.0409123	0.073882	0.580024	NA	NA	NA	NA
diabetes_type_2	psoriasis	MR Egger Intercept	450	0.00292565	0.00149683	0.0512554	NA	NA	NA	NA
diabetes_type_2	RA	Inverse variance weighted	440	0.0261644	0.0161284	0.104749	983.001	439	1.12289e-43	67.2957
diabetes_type_2	RA	MR Egger	440	-0.0629854	0.0328015	0.0554822	961.742	438	2.67791e-41	NA
diabetes_type_2	RA	Weighted median	440	-0.0202272	0.0202506	0.317871	NA	NA	NA	NA
diabetes_type_2	RA	Weighted mode	440	-0.0411393	0.0312069	0.188098	NA	NA	NA	NA
diabetes_type_2	RA	Weighted mode (NOME)	440	-0.0411393	0.0287045	0.152512	NA	NA	NA	NA
diabetes_type_2	RA	Simple mode	440	0.0619592	0.0579479	0.285557	NA	NA	NA	NA
diabetes_type_2	RA	Simple mode (NOME)	440	0.0619592	0.0607916	0.308666	NA	NA	NA	NA
diabetes_type_2	RA	MR Egger Intercept	440	0.00503116	0.0016169	0.0019824	NA	NA	NA	NA
diabetes_type_2	RA	Inverse variance weighted	432	0.0248447	0.014711	0.0912477	794.753	431	6.09238e-24	67.2957
diabetes_type_2	RA	MR Egger	432	-0.0542956	0.0298782	0.0698782	778.095	430	2.03842e-22	NA
diabetes_type_2	RA	Weighted median	432	-0.0203717	0.0204181	0.318411	NA	NA	NA	NA
diabetes_type_2	RA	Weighted mode	432	-0.0383622	0.0276946	0.166712	NA	NA	NA	NA
diabetes_type_2	RA	Weighted mode (NOME)	432	-0.0446353	0.0285704	0.118953	NA	NA	NA	NA
diabetes_type_2	RA	Simple mode	432	0.068281	0.0661445	0.30251	NA	NA	NA	NA
diabetes_type_2	RA	Simple mode (NOME)	432	0.068281	0.0616568	0.268723	NA	NA	NA	NA
diabetes_type_2	RA	MR Egger Intercept	432	0.00448547	0.00147834	0.00255856	NA	NA	NA	NA
HF	asthma	Inverse variance weighted	27	0.132603	0.0443574	0.00279494	63.6205	26	5.36655e-05	41.7749
HF	asthma	MR Egger	27	-0.0439184	0.127041	0.732458	58.5059	25	0.000167431	NA
HF	asthma	Weighted median	27	0.0828585	0.0505466	0.101161	NA	NA	NA	NA
HF	asthma	Weighted mode	27	0.116475	0.122024	0.348608	NA	NA	NA	NA
HF	asthma	Weighted mode (NOME)	27	0.270833	0.149268	0.0811704	NA	NA	NA	NA
HF	asthma	Simple mode	27	0.262414	0.133568	0.0602271	NA	NA	NA	NA
HF	asthma	Simple mode (NOME)	27	0.262414	0.136191	0.0649997	NA	NA	NA	NA
HF	asthma	MR Egger Intercept	27	0.00863668	0.00584213	0.151805	NA	NA	NA	NA
HF	asthma	Inverse variance weighted	27	0.132603	0.0443574	0.00279494	63.6205	26	5.36655e-05	41.7749
HF	asthma	MR Egger	27	-0.0439184	0.127041	0.732458	58.5059	25	0.000167431	NA
HF	asthma	Weighted median	27	0.0828585	0.0513243	0.106438	NA	NA	NA	NA
HF	asthma	Weighted mode	27	0.116475	0.119864	0.34014	NA	NA	NA	NA
HF	asthma	Weighted mode (NOME)	27	0.270833	0.136559	0.0579925	NA	NA	NA	NA
HF	asthma	Simple mode	27	0.262414	0.129403	0.0529358	NA	NA	NA	NA
HF	asthma	Simple mode (NOME)	27	0.262414	0.131241	0.0561078	NA	NA	NA	NA
HF	asthma	MR Egger Intercept	27	0.00863668	0.00584213	0.151805	NA	NA	NA	NA
HF	COPD	Inverse variance weighted	27	0.0939901	0.0713715	0.187868	73.3838	26	2.10768e-06	41.7749
HF	COPD	MR Egger	27	-0.234367	0.205862	0.265717	65.8375	25	1.56702e-05	NA
HF	COPD	Weighted median	27	0.0696944	0.0744662	0.349314	NA	NA	NA	NA
HF	COPD	Weighted mode	27	0.00326942	0.112213	0.976979	NA	NA	NA	NA
HF	COPD	Weighted mode (NOME)	27	-0.00653368	0.117578	0.95611	NA	NA	NA	NA
HF	COPD	Simple mode	27	0.189528	0.155397	0.233551	NA	NA	NA	NA
HF	COPD	Simple mode (NOME)	27	0.189528	0.170031	0.275191	NA	NA	NA	NA
HF	COPD	MR Egger Intercept	27	0.0159618	0.00942933	0.102924	NA	NA	NA	NA
HF	COPD	Inverse variance weighted	26	0.0877106	0.0670576	0.190877	62.1682	25	5.22065e-05	41.7749
HF	COPD	MR Egger	26	-0.233019	0.19198	0.236646	54.9667	24	0.000316287	NA
HF	COPD	Weighted median	26	0.069596	0.0696118	0.31742	NA	NA	NA	NA
HF	COPD	Weighted mode	26	0.023302	0.131711	0.860999	NA	NA	NA	NA
HF	COPD	Weighted mode (NOME)	26	0.0191342	0.143681	0.895124	NA	NA	NA	NA
HF	COPD	Simple mode	26	0.169175	0.174624	0.341927	NA	NA	NA	NA
HF	COPD	Simple mode (NOME)	26	0.169175	0.176196	0.346174	NA	NA	NA	NA
HF	COPD	MR Egger Intercept	26	0.0155957	0.00879504	0.0888818	NA	NA	NA	NA
HF	OA	Inverse variance weighted	27	0.0145435	0.0310888	0.639924	77.2759	26	5.47613e-07	41.7749
HF	OA	MR Egger	27	-0.0739581	0.0785995	0.355735	72.908	25	1.41092e-06	NA
HF	OA	Weighted median	27	0.0089767	0.0313126	0.774357	NA	NA	NA	NA
HF	OA	Weighted mode	27	-0.00628899	0.0367055	0.865286	NA	NA	NA	NA
HF	OA	Weighted mode (NOME)	27	-0.00628899	0.0378092	0.86918	NA	NA	NA	NA
HF	OA	Simple mode	27	-0.0026493	0.0550399	0.961977	NA	NA	NA	NA
HF	OA	Simple mode (NOME)	27	-0.0026493	0.05332	0.960752	NA	NA	NA	NA
HF	OA	MR Egger Intercept	27	0.00463377	0.0037863	0.232427	NA	NA	NA	NA
HF	OA	Inverse variance weighted	26	0.0043618	0.0297163	0.883305	66.0185	25	1.4754e-05	41.7749
HF	OA	MR Egger	26	-0.0564382	0.0757593	0.463525	63.9856	24	1.71251e-05	NA
HF	OA	Weighted median	26	0.00698057	0.0289663	0.809563	NA	NA	NA	NA
HF	OA	Weighted mode	26	-0.00472248	0.0395628	0.905939	NA	NA	NA	NA
HF	OA	Weighted mode (NOME)	26	-0.00472248	0.0394974	0.905784	NA	NA	NA	NA
HF	OA	Simple mode	26	-0.00113358	0.0559498	0.983996	NA	NA	NA	NA
HF	OA	Simple mode (NOME)	26	-0.00113358	0.0567983	0.984235	NA	NA	NA	NA
HF	OA	MR Egger Intercept	26	0.00323134	0.00370048	0.391196	NA	NA	NA	NA
HF	PMR	Inverse variance weighted	27	0.0705607	0.0947196	0.456306	24.2469	26	0.561851	41.7749
HF	PMR	MR Egger	27	0.272798	0.271983	0.325471	23.6177	25	0.541543	NA
HF	PMR	Weighted median	27	0.0797915	0.136389	0.558528	NA	NA	NA	NA
HF	PMR	Weighted mode	27	0.0463001	0.211311	0.828276	NA	NA	NA	NA
HF	PMR	Weighted mode (NOME)	27	0.0463001	0.212225	0.829004	NA	NA	NA	NA
HF	PMR	Simple mode	27	-0.072239	0.236462	0.762418	NA	NA	NA	NA
HF	PMR	Simple mode (NOME)	27	-0.072239	0.238195	0.764093	NA	NA	NA	NA
HF	PMR	MR Egger Intercept	27	-0.0102003	0.0128593	0.435111	NA	NA	NA	NA
HF	PMR	Inverse variance weighted	27	0.0705607	0.0947196	0.456306	24.2469	26	0.561851	41.7749
HF	PMR	MR Egger	27	0.272798	0.271983	0.325471	23.6177	25	0.541543	NA
HF	PMR	Weighted median	27	0.0797915	0.129999	0.539356	NA	NA	NA	NA
HF	PMR	Weighted mode	27	0.0463001	0.22425	0.838035	NA	NA	NA	NA
HF	PMR	Weighted mode (NOME)	27	0.0463001	0.208417	0.825932	NA	NA	NA	NA
HF	PMR	Simple mode	27	-0.072239	0.23458	0.760574	NA	NA	NA	NA
HF	PMR	Simple mode (NOME)	27	-0.072239	0.232836	0.758839	NA	NA	NA	NA
HF	PMR	MR Egger Intercept	27	-0.0102003	0.0128593	0.435111	NA	NA	NA	NA
HF	psoriasis	Inverse variance weighted	27	0.107276	0.0799932	0.1799	55.6545	26	0.000625229	41.7749
HF	psoriasis	MR Egger	27	0.185043	0.203064	0.370864	55.2684	25	0.000453772	NA
HF	psoriasis	Weighted median	27	0.0450217	0.0895183	0.615011	NA	NA	NA	NA
HF	psoriasis	Weighted mode	27	0.0423866	0.113271	0.711287	NA	NA	NA	NA
HF	psoriasis	Weighted mode (NOME)	27	0.0423866	0.114148	0.713402	NA	NA	NA	NA
HF	psoriasis	Simple mode	27	0.0600761	0.157978	0.706825	NA	NA	NA	NA
HF	psoriasis	Simple mode (NOME)	27	0.0600761	0.153744	0.699164	NA	NA	NA	NA
HF	psoriasis	MR Egger Intercept	27	-0.00420536	0.0100626	0.679573	NA	NA	NA	NA
HF	psoriasis	Inverse variance weighted	26	0.0596693	0.0677078	0.378168	36.8527	25	0.0596205	41.7749
HF	psoriasis	MR Egger	26	0.233937	0.165241	0.1697	34.9134	24	0.0696957	NA
HF	psoriasis	Weighted median	26	0.0405801	0.0892994	0.649522	NA	NA	NA	NA
HF	psoriasis	Weighted mode	26	0.0512487	0.114433	0.658121	NA	NA	NA	NA
HF	psoriasis	Weighted mode (NOME)	26	0.0557607	0.126761	0.663797	NA	NA	NA	NA
HF	psoriasis	Simple mode	26	0.0783209	0.163062	0.63518	NA	NA	NA	NA
HF	psoriasis	Simple mode (NOME)	26	0.0783209	0.172951	0.654563	NA	NA	NA	NA
HF	psoriasis	MR Egger Intercept	26	-0.00956902	0.00828765	0.259617	NA	NA	NA	NA
HF	RA	Inverse variance weighted	26	0.240614	0.0985098	0.0145846	118.719	25	3.7233e-14	41.2957
HF	RA	MR Egger	26	-0.116792	0.253862	0.649614	108.283	24	1.12349e-12	NA
HF	RA	Weighted median	26	0.169346	0.0697288	0.0151556	NA	NA	NA	NA
HF	RA	Weighted mode	26	0.195479	0.149314	0.202379	NA	NA	NA	NA
HF	RA	Weighted mode (NOME)	26	0.220435	0.136326	0.118435	NA	NA	NA	NA
HF	RA	Simple mode	26	0.226674	0.118045	0.0663061	NA	NA	NA	NA
HF	RA	Simple mode (NOME)	26	0.226674	0.116468	0.0629487	NA	NA	NA	NA
HF	RA	MR Egger Intercept	26	0.0181321	0.0119222	0.141362	NA	NA	NA	NA
HF	RA	Inverse variance weighted	22	0.174559	0.0506271	0.000564896	20.244	21	0.505857	41.2957
HF	RA	MR Egger	22	0.33352	0.145544	0.0329187	18.8869	20	0.529188	NA
HF	RA	Weighted median	22	0.184664	0.0698194	0.00817209	NA	NA	NA	NA
HF	RA	Weighted mode	22	0.159819	0.129305	0.230112	NA	NA	NA	NA
HF	RA	Weighted mode (NOME)	22	0.172608	0.127484	0.190141	NA	NA	NA	NA
HF	RA	Simple mode	22	0.159819	0.143994	0.27959	NA	NA	NA	NA
HF	RA	Simple mode (NOME)	22	0.159819	0.143929	0.279377	NA	NA	NA	NA
HF	RA	MR Egger Intercept	22	-0.00781923	0.00671214	0.257751	NA	NA	NA	NA
hypertension	asthma	Inverse variance weighted	570	0.0905354	0.0127334	1.15988e-12	1393.29	569	7.4059e-71	60.6778
[truncated: 383 more rows]

[truncated: 5 more sheets: S11 , S12, S13 , S14, S15]
